# Supplementary material for: Integrated multi-locus genome-wide association studies and transcriptome analysis for seed yield and yield-related traits in Brassica napus
Source: Front Plant Sci. 2023 Apr 14;14:1153000. doi: 10.3389/fpls.2023.1153000 (PMC10140536; doi:10.3389/fpls.2023.1153000)
Supplement: Supplementary file 1 [file Table_1.xlsx]

## Sheet: Table S1
Supplementary Table S1 Primers used for qRT-PCR in this study
Gene ID	Forward primer sequence (5'→3')	Reverse primer sequence (5'→3')
BnaA02g05120D	CTTCAACCATCCTTCCAA	TTCACGCTTGTAGAGTTC
BnaA02g05540D	TGTTAGAGGAAAGACCAT	TTACAATGAGAGCCACTA
BnaA06g17710D	GCTAACTTATGTGTTGTATC	GATGCCATTAGTCTTGTT
BnaA06g21890D	TTCTTCTTCTACGACTACT	CTTGGCATATACGACATT
BnaA09g08410D	AGTTGATAGACAGAGGTT	CCGTCAAGAACATAACAA
BnaA09g39450D	CTAATAGTGGAGAAGATGGAT	TGTGAGAAGAAGGTGAAC
BnaA09g39920D	AGGCTGATATGTTAGTTAT	TTGAGGATTCTTCTTCTT
BnaA09g57040D	AAGAATGAGAGGAAGAGA	TACTGTTGTGGTTGTTAG
BnaA10g22530D	AAGTTCACATCAATCCAA	GACGACGATATTTGAAGA
BnaA10g23070D	CTGTTGCTGAGACGATAA	CATAATGTGCTTGTTCCTAA
BnaC03g27900D	GAAGAAGTATATCTACACCAT	AAGTCAGTTCCATCTCTA
BnaC03g45540D	TACATCTCCGTCGTCTAG	TAAACCAAACGAGAACAG
BnaC04g26460D	TGTTGATATGTGGTCTGTT	CTCAGTTGGTGTTCCTAG
BnaC05g18750D	GAATCAGGAGAAGGAGAAC	AATTGTAAGCGGAAGGAG
BnaC08g43130D	CGTTCTGATATGATTATGG	CGTTTCCTGTAAATGATT
BnaC08g43830D	CGACTTGAAGATGTATAAG	CATAAGAGGGAACATAATC
BnaC09g09430D	TTGAGATGGAGGATGTAA	TGCGGTAGAATGAGTATA
BnaC09g25980D	AGATTGTGGGTATAATAGGA	ACGGTATTGGTGAGTATT
BnaC09g36710D	AGAGATATTCTACATTGTG	TAATGAGGAAGATACAGT
BnaC09g43860D	CTTGTCTCTGGAACTGTA	ATTTGTCTTTCTTTGGTGAT
BnaC09g43890D	TTGGAACTATGGATAAGGT	CTGGTAATGGAGAAGACA
BnaC09g47280D	CAACGGCTTAGTGAGATT	AAGGCTGTTCAGATGTAA
BnaA09g39640D	TGGTGTAACAATCGTAGT	ATTCTCTTGAGGCGTATT
BnaA09g39790D	ACGGTGTAATCAATAAATG	CTCCAACAAGAATTATCG
BnaA09g39840D	CTCTTAGGATTGATGCTA	CTTCTTGGTAATAGTTGAC
BnaA03g55890D	CTGGAATTGCTGACCGTATGAG	ATCTGTTGGAAAGTGCTGAGGG

## Sheet: Table S2
Supplementary Table S2 Significantly associated QTNs identified by multi-locus GWAS in the eight traits
Trait	QTN	Chr	Position	LOD	R2(%)	Method	Environment
PH	qPHYL13-A01-1	A01	13477378	3.43-7.85	0.87-2.28	2,5	E1
	qPHYL13-A01-2	A01	13502530	5.18-8.69	1.10-4.22	3,4	E1
	qPHYL13-A01-3	A01	13445808	6.61-8..81	2.03-3.20	3,5	E1
	qPHYL13-A02-1	A02	6017174	3.94-4.95	0.82-3.85	2,4,6	E1
	qPHYL13-A03-1	A03	1595670	4.25-8.38	0.87-2.13	1,3	E1
	qPHYL13-A03-2	A03	28351091	4.48-7.32	0.91-3.04	2,3,5	E1
	qPHYL13-A03-3	A03	25516986	3.92-4.19	0.80-0.92	2,4	E1
	qPHYL13-A03-4	A03	29005800	6.16-6.85	1.57-2.75	3,4,5	E1
	qPHYL13-A05-1	A05	8015598	4.16-8.33	1.22-3.70	1,2,4	E1
	qPHYL13-A06-1	A06	1823673	4.19-11.30	0.99-4.04	2,3,4,5	E1
	qPHYL13-A06-2	A07	21991244	3.38-4.15	0.85-0.85	2,3	E1
	qPHYL13-A07-1	A07	22347600	3.69-4.85	0.72-1.36	4,5	E1
	qPHYL13-A09-1	A09	104022	5.90-12.43	1.64-2.07	1,2,3,5	E1
	qPHYL13-A09-2	A09	17988451	4.07-7.80	1.79-2.48	2,5	E1
	qPHYL13-A10-1	A10	12029059	5.81-9.57	1.82-4.95	3,5	E1
	qPHYL13-C01-1	C01	38211270	5.66-20.21	1.90-4.71	1,2,3	E1
	qPHYL13-C01-2	C01	28583866	5.54-6.86	3.02-3.72	2,4	E1
	qPHYL13-C01-3	C01	37878754	3.77-5.67	1.14-2.72	3,4,5	E1
	qPHYL13-C02-1	C02	39946683	6.77-11.17	3.14-3.55	1,4	E1
	qPHYL13-C02-2	C02	29840248	4.93-6.09	1.16-1.64	2,3	E1
	qPHYL13-C02-3	C02	21805491	4.00-7.07	1.15-2.84	2,4,5	E1
	qPHYL13-C02-4	C02	33661739	5.07-7.30	2.22-3.00	2,4,5	E1
	qPHYL13-C03-1	C03	19914224	3.44-7.54	1.32-1.96	2,4	E1
	qPHYL13-C04-1	C04	4135194	3.81-14.63	1.77-4.91	1,2,3,4	E1
	qPHYL13-C04-2	C04	16211781	4.35-9.40	2.06-2.55	1,4	E1
	qPHYL13-C04-3	C04	35640810	6.78-11.05	3.37-5.18	2,4,5	E1
	qPHYL13-C04-4	C04	14522903	4.01-6.30	1.82-2.11	2,5	E1
	qPHYL13-C05-1	C05	40921255	6.25-6.91	2.01-2.36	1,2	E1
	qPHYL13-C05-2	C05	865706	3.46-11.26	1.41-3.87	1,2,3,4,5	E1
	qPHYL13-C05-3	C05	35061843	5.11-9.57	2.48-2.76	2,3,4	E1
	qPHYL13-C06-1	C06	6497211	3.72-8.93	0.93-2.84	1,2,3	E1
	qPHYL13-C06-2	C06	4156855	3.44-5.91	0.72-2.61	1,2,3,4,5	E1
	qPHYL13-C06-3	C06	20847312	4.29-11.39	1.50-3.96	2,5	E1
	qPHYL13-C07-1	C07	18622573	4.40-6.99	1.05-3.32	2,3,4,5	E1
	qPHYL13-C07-2	C07	24180012	4.01-6.06	1.44-4.37	2,4	E1
	qPHYL13-C07-3	C07	25751625	3.84-10.22	1.74-3.09	2,4	E1
	qPHYL13-C07-4	C07	37176669	5.00-6.17	1.41-1.92	2,4	E1
	qPHYL13-C07-5	C07	15728432	3.16-4.62	0.73-1.95	2,5	E1
	qPHYL13-C08-1	C08	29928392	3.26-4.47	0.83-1.39	3,4	E1
	qPHYL13-C09-1	C09	27451837	4.82-12.35	1.54-3.88	1,2,3,4,5	E1
	qPHYL13-C09-2	C09	38160132	3.65-5.65	0.53-1.56	2,3	E1
	qPHYL13-C09-3	C09	41492529	3.71-4.14	0.91-1.20	2,3,5	E1
	qPHYL13-C09-4	C09	5270140	5.00-7.16	2.15-3.07	2,4,5	E1
	qPHNC14-A02-1	A02	5644617	3.82-4.60	0.93-2.23	3,4	E2
	qPHNC14-A03-1	A03	4814195	4.38-8.20	1.00-2.43	2,3	E2
	qPHNC14-A05-1	A05	1227250	5.01-9.35	1.15-3.14	1,2,5	E2
	qPHNC14-A05-2	A05	19533139	4.48-9.82	1.74-4.77	2,3,5	E2
	qPHNC14-A05-3	A05	5342679	3.43-4.28	1.48-1.71	2,4	E2
	qPHNC14-A05-4	A05	8239952	3.14-6.18	1.40-1.56	3,5	E2
	qPHNC14-A06-1	A06	7951970	5.75-6.44	1.51-5.36	3,5	E2
	qPHNC14-A07-1	A07	21110213	6.20-7.31	1.37-2.12	2,3	E2
	qPHNC14-A10-1	A10	12232810	4.35-12.04	1.65-5.33	2,3,4,5	E2
	qPHNC14-A10-2	A10	13593030	4.06-7.81	1.67-2.73	2,4	E2
	qPHNC14-C01-1	C01	20876387	5.08-6.26	1.07-2.16	2,3	E2
	qPHNC14-C02-1	C02	16018054	3.64-11.71	1.91-5.13	1,2,3,4,5	E2
	qPHNC14-C02-2	C02	21824568	7.91-8.54	1.79-2.64	2,3	E2
	qPHNC14-C03-1	C03	9101221	3.76-14.67	1.57-7.19	1,2,3	E2
	qPHNC14-C03-2	C03	8093988	3.00-6.96	0.49-2.27	2,3	E2
	qPHNC14-C03-3	C03	13701276	3.67-5.81	0.80-1.89	1,3	E2
	qPHNC14-C03-4	C03	50254673	5.49-6.65	2.66-3.38	2,4	E2
	qPHNC14-C04-1	C04	43686479	3.89-9.14	1.99-4.56	1,2,4,5	E2
	qPHNC14-C04-2	C04	26783353	4.42-6.54	1.44-2.79	1,3	E2
	qPHNC14-C04-3	C04	34062261	4.45-7.52	1.58-2.46	3,5	E2
	qPHNC14-C04-4	C04	42374117	4.09-6.89	1.58-5.21	1,4	E2
	qPHNC14-C05-1	C05	33730197	5.31-8.27	2.13-3.67	2,3,4	E2
	qPHNC14-C05-2	C05	38346175	3.78-6.12	1.65-2.72	3,5	E2
	qPHNC14-C06-1	C06	20908538	3.52-8.87	1.99-5.32	2,3,4,5	E2
	qPHNC14-C06-2	C06	10370207	3.19-4.65	0.67-3.01	3,5	E2
	qPHNC14-C06-3	C06	18786611	4.14-4.35	1.63-1.95	1,4	E2
	qPHNC14-C06-4	C06	21039900	4.70-9.45	0.88-1.32	1,2	E2
	qPHNC14-C07-1	C07	34933357	4.61-7.62	1.24-2.65	2,3,4	E2
	qPHNC14-C07-2	C07	17089905	3.61-5.16	1.71-2.18	1,5	E2
	qPHNC14-C07-1	C08	15379554	7.21-11.93	3.06-5.30	2,3,4,5	E2
	qPHNC14-C07-2	C08	18801051	4.14-6.64	1.77-2.50	1,2,3	E2
	qPHNC14-C07-3	C08	1707533	7.56-9.50	3.32-5.37	2,4	E2
	qPHNC14-C09-1	C09	11549816	4.44-5.91	0.99-1.51	1,2,5	E2
	qPHNC14-C09-2	C09	23082357	5.73-8.04	2.25-4.46	3,4,5	E2
	qPHNC14-C09-3	C09	38872691	4.30-4.99	1.70-2.76	3,4,5	E2
	qPHNC14-C09-4	C09	21596403	3.44-5.90	1.76-2.07	1,2	E2
	qPHNC14-C09-5	C09	31175174	6.83-8.08	3.16-5.10	1,4	E2
	qPHNC14-C09-6	C09	40352660	5.66-5.95	0.18-0.46	2,4	E2
	qPHWH16-A01-1	A01	44909	5.16-11.26	1.88-3.45	2,3,5	E3
	qPHWH16-A01-2	A01	17715206	3.35-6.07	1.22-1.84	1,2,3	E3
	qPHWH16-A01-3	A01	20707781	5.64-6.76	1.98-2.09	2,3	E3
	qPHWH16-A02-1	A02	1577844	3.49-9.91	0.42-1.84	1,3,4	E3
	qPHWH16-A03-1	A03	28172910	4.41-7.50	1.10-1.77	2,3	E3
	qPHWH16-A05-1	A05	10268685	4.52-5.70	0.86-1.08	1,4	E3
	qPHWH16-A06-1	A06	3477693	3.84-4.92	0.70-1.11	1,5	E3
	qPHWH16-A06-2	A06	13067623	3.15-3.23	1.06-1.20	1,5	E3
	qPHWH16-A07-1	A07	5632988	5.52-9.83	3.01-4.03	1,2,4	E3
	qPHWH16-A09-1	A09	8627846	3.17-7.42	1.14-2.50	2,3,4,5	E3
	qPHWH16-A09-2	A09	13086818	3.58-8.50	1.77-4.87	2,4	E3
	qPHWH16-A09-3	A09	17055019	7.10-8.11	2.26-3.55	2,3	E3
	qPHWH16-A09-4	A09	32059301	3.50-6.00	1.33-1.91	4,5	E3
	qPHWH16-A10-1	A10	8523802	3.86-9.29	1.02-2.92	2,3,5	E3
	qPHWH16-C01-1	C01	10062468	4.35-5.25	1.14-2.64	1,4	E3
	qPHWH16-C01-2	C01	16701425	6.46-6.65	2.80-3.39	2,5	E3
	qPHWH16-C01-3	C01	19472838	3.98-9.35	1.68-3.88	1,5	E3
	qPHWH16-C02-1	C02	25897170	3.86-10.37	0.09-0.25	3,5	E3
	qPHWH16-C04-1	C04	6504674	12.38-24.06	8.31-9.54	1,2,4	E3
	qPHWH16-C04-2	C04	25598341	3.61-10.52	2.41-2.83	1,2,3,4	E3
	qPHWH16-C04-3	C04	39653913	5.64-15.34	1.87-4.40	1,2,3,4,5	E3
	qPHWH16-C04-4	C04	38022781	3.94-4.20	1.42-1.44	2,3	E3
	qPHWH16-C04-5	C04	39075663	4.63-6.76	2.20-4.03	2,4	E3
	qPHWH16-C05-1	C05	9370278	4.68-11.90	2.98-3.61	2,3,5	E3
	qPHWH16-C05-2	C05	36252249	6.96-14.20	4.18-5.15	2,3,4	E3
	qPHWH16-C05-3	C05	27006946	3.12-4.92	0.98-1.93	2,4	E3
	qPHWH16-C05-4	C05	38055745	4.35-4.95	1.35-2.39	3,4	E3
	qPHWH16-C06-1	C06	29660554	3.05-5.75	1.61-1.69	2,4	E3
	qPHWH16-C07-1	C07	41298135	3.31-6.32	0.36-1.59	1,3,6	E3
	qPHWH16-C07-2	C07	16891290	4.21-4.27	1.93-2.34	2,5	E3
	qPHWH16-C07-3	C07	24167801	4.07-7.15	1.66-2.93	2,3	E3
	qPHWH16-C07-1	C08	1721160	5.14-7.86	1.09-3.11	1,3,5	E3
	qPHWH16-C07-2	C08	18928273	4.69-7.07	1.15-2.97	2,3,4	E3
	qPHWH16-C07-3	C08	14292762	9.56-10.60	3.86-5.18	2,4	E3
	qPHWH16-C07-4	C08	27753871	4.39-6.05	1.40-2.11	2,4	E3
	qPHWH16-C09-1	C09	19357140	4.75-6.25	2.06-2.53	4,5	E3
	qPHWH16-C09-2	C09	47083398	4.27-9.07	2.72-4.07	2,4	E3
FT	qFTYL13-A01-1	A01	5331556	3.19-3.86	0.99-1.22	2,3	E1
	qFTYL13-A01-2	A01	21966597	7.61-8.65	3.59-5.35	3,5	E1
	qFTYL13-A02-2	A03	3784916	4.11-5.69	1.34-2.12	2,3	E1
	qFTYL13-A03-1	A03	23460059	4.76-9.69	2.07-4.25	2,3,5	E1
	qFTYL13-A06-1	A06	10055162	3.22-6.37	2.31-5.29	1,4,6	E1
	qFTYL13-A07-1	A07	22908602	3.21-12.71	0.06-2.86	1,2,3,5,6	E1
	qFTYL13-A08-1	A08	1997873	3.23-3.46	0.40-1.03	2,5	E1
	qFTYL13-A09-1	A09	28437625	3.29-8.00	1.43-2.72	2,5,6	E1
	qFTYL13-A10-1	A10	13668235	10.56-15.37	4.64-7.70	2,3	E1
	qFTYL13-C01-1	C01	20920370	3.35-5.64	1.12-4.00	2,3,4	E1
	qFTYL13-C02-1	C02	8629330	6.75-9.73	2.25-3.80	1,2	E1
	qFTYL13-C03-1	C03	54974502	3.11-5.86	1.04-2.15	1,2	E1
	qFTYL13-C03-2	C03	12024986	3.07-10.20	2.22-4.77	2,3,4,5	E1
	qFTYL13-C03-3	C03	54834997	3.11-14.48	1.04-7.30	2,3,4,5	E1
	qFTYL13-C04-1	C04	13905362	5.17-7.50	2.99-3.51	1,4	E1
	qFTYL13-C04-2	C04	25285025	5.13-6.73	1.55-2.65	2,3	E1
	qFTYL13-C05-1	C05	24445098	4.97-6.30	2.46-3.54	2,5	E1
	qFTYL13-C05-2	C05	38369328	3.41-7.75	1.10-3.28	2,3	E1
	qFTYL13-C05-3	C05	21875130	4.50-5.35	2.07-4.52	2,4,5	E1
	qFTYL13-C05-4	C05	12956572	4.24-4.42	0.93-1.72	1,3	E1
	qFTYL13-C06-1	C06	23464784	4.20-9.28	0.89-4.73	2,3	E1
	qFTYL13-C07-1	C07	1380178	4.16-4.93	2.21-3.62	1,4	E1
	qFTYL13-C07-2	C07	18963666	4.03-4.17	1.19-4.50	3,4	E1
	qFTYL13-C07-3	C07	25298131	3.19-3.40	2.04-4.45	4,5	E1
	qFTYL13-C08-1	C08	17219641	5.75-6.61	2.60-5.58	2,5	E1
	qFTYL13-C08-2	C08	2932849	4.13-8.55	2.11-4.68	1,2,3,4	E1
	qFTYL13-C08-3	C08	18905826	3.05-7.18	0.83-3.38	1,2,5	E1
	qFTYL13-C09-1	C09	18729975	6.10-7.29	1.98-2.73	1,3	E1
	qFTYL13-C09-2	C09	39277100	5.95-6.89	2.97-3.27	2,3	E1
	qFTYL13-C09-3	C09	36081732	3.22-8.04	0.53-4.05	2,3,4	E1
	qFTYL13-C09-4	C09	36629709	3.20-9.54	1.67-5.55	1,2,4,5	E1
	qFTYL13-C09-5	C09	45879981	3.77-7.28	1.99-5.74	1,2,3,4,5	E1
	qFTYL13-C09-6	C09	47042755	3.01-4.82	1.78-2.55	2,4	E1
	qFTNC14-A01-1	A01	21966108	3.51-4.93	1.62-4.23	1,2,4,5	E2
	qFTNC14-A03-1	A03	6603733	5.50-7.07	1.73-1.75	2,3	E2
	qFTNC14-A04-1	A04	5427325	3.24-3.35	2.24-2.90	4,5	E2
	qFTNC14-A06-1	A06	16293561	5.33-11.76	1.21-5.02	1,3	E2
	qFTNC14-A08-1	A08	6241006	4.19-6.70	1.67-7.32	2,3,5	E2
	qFTNC14-A10-1	A10	4626930	3.48-5.43	1.23-1.43	2,3	E2
	qFTNC14-A10-2	A10	7926879	3.73-6.92	0.87-2.98	1,2,3	E2
	qFTNC14-C02-1	C02	31328973	3.43-7.76	1.42-2.33	1,3	E2
	qFTNC14-C03-1	C03	45863458	6.63-6.81	2.37-5.12	3,4	E2
	qFTNC14-C04-1	C04	30774727	4.56-4.89	0.90-1.31	2,3	E2
	qFTNC14-C05-1	C05	25767695	4.78-6.29	3.03-3.72	2,4	E2
	qFTNC14-C05-2	C05	30648159	4.50-4.77	2.97-5.87	2,4	E2
	qFTNC14-C05-3	C05	7459349	3.61-10.23	1.13-5.35	2,3,4,5	E2
	qFTNC14-C05-4	C05	36573565	3.06-5.29	1.18-3.71	2,3,5	E2
	qFTNC14-C06-1	C06	19167268	3.66-4.39	1.17-1.33	2,3	E2
	qFTNC14-C06-2	C06	546022	4.64-6.56	3.23-6.54	1,4,6	E2
	qFTNC14-C06-3	C06	22249300	4.26-5.49	1.87-4.51	1,2,4	E2
	qFTNC14-C07-1	C07	34111208	3.51-7.41	1.38-1.87	2,3	E2
	qFTNC14-C07-2	C07	43191929	3.04-6.95	2.29-2.35	2,3	E2
	qFTNC14-C07-3	C07	13020732	3.44-7.27	1.30-2.57	1,2,3	E2
	qFTNC14-C07-4	C07	32197435	3.52-9.60	1.69-6.36	1,2,5	E2
	qFTNC14-C08-1	C08	585422	4.03-5.82	3.67-7.12	2,4	E2
	qFTNC14-C08-2	C08	1314643	3.72-13.13	1.42-4.80	2,3	E2
	qFTNC14-C08-3	C08	33452621	3.96-3.98	3.08-5.38	4,5	E2
	qFTNC14-C08-4	C08	34482052	3.52-6.94	1.21-2.31	2,3	E2
	qFTNC14-C09-1	C09	40752804	4.36-16.04	0.80-5.17	1,3	E2
	qFTNC14-C09-2	C09	45702482	5.99-12.10	2.84-3.49	1,2	E2
	qFTNC14-C09-3	C09	46963599	3.21-12.38	1.43-4.80	2,3	E2
	qFTNC14-C09-4	C09	45879370	4.36-4.83	2.84-4.57	2,4,5	E2
	qFTWH16-A01-1	A01	22399724	3.11-7.81	0.53-2.47	1,2,3	E3
	qFTWH16-A02-1	A02	8448485	3.24-3.84	0.59-2.12	3,4	E3
	qFTWH16-A02-2	A02	823532	6.02-8.73	1.63-2.53	2.3	E3
	qFTWH16-A03-1	A03	19068425	6.56-6.85	1.31-1.45	2,3	E3
	qFTWH16-A03-2	A03	22460550	5.59-6.76	0.26-0.34	2,3	E3
	qFTWH16-A03-3	A03	25897765	10.12-10.21	3.05-3.22	2,3	E3
	qFTWH16-A03-4	A03	22616177	6.56-15.01	3.27-4.66	1,2,5	E3
	qFTWH16-A04-1	A04	5779016	3.58-6.77	1.24-2.48	2,3	E3
	qFTWH16-A05-1	A05	654751	3.85-7.64	1.93-7.14	1,2,3,4,5,6	E3
	qFTWH16-A07-1	A07	15522141	3.36-6.47	1.24-2.83	1,2,3	E3
	qFTWH16-A08-1	A08	12389134	5.23-13.04	2.86-5.09	2,3,5	E3
	qFTWH16-A09-1	A09	16691949	3.10-5.95	2.44-2.90	1,4	E3
	qFTWH16-A09-2	A09	26424278	5.26-14.76	1.91-5.05	2,3,4	E3
	qFTWH16-A10-1	A10	2497174	3.87-5.37	1.93-3.17	1,2,4,5	E3
	qFTWH16-A10-2	A10	13668235	10.56-15.37	4.64-7.70	2,3	E3
	qFTWH16-C01-1	C01	1165947	3.57-7.55	2.83-4.46	1,4	E3
	qFTWH16-C01-2	C01	2781748	4.31-7.24	1.29-2.27	2,3	E3
	qFTWH16-C01-3	C01	34163417	3.82-5.73	0.91-1.98	2,3	E3
	qFTWH16-C02-1	C02	33276136	5.41-13.66	1.05-3.40	1,3	E3
	qFTWH16-C03-1	C03	15174218	3.58-4.69	0.84-1.59	2,3	E3
	qFTWH16-C03-2	C03	39032905	4.19-5.16	1.25-1.32	2,3	E3
	qFTWH16-C03-3	C03	12081167	3.04-5.72	0.35-3.79	1,2,3,4,5,6	E3
	qFTWH16-C03-4	C03	32290227	3.66-11.24	1.40-4.88	1,2,3,5	E3
	qFTWH16-C04-1	C04	13905330	3.34-6.79	3.02-4.67	2,5	E3
	qFTWH16-C04-2	C04	44029664	7.77-11.65	2.79-4.15	2,3	E3
	qFTWH16-C05-1	C05	221650	3.72-6.41	1.18-2.39	2,3	E3
	qFTWH16-C05-2	C05	2412490	3.40-8..37	1.10-2.51	2,3	E3
	qFTWH16-C05-3	C05	1574534	3.53-9.09	2.84-3.89	2,3,5	E3
	qFTWH16-C05-4	C05	12956572	4.24-4.42	0.93-1.72	1,3	E3
	qFTWH16-C06-1	C06	11010860	5.17-5.30	1.77-1.82	2,3	E3
	qFTWH16-C06-2	C06	15269522	3.60-7.37	1.45-2.86	1,3	E3
	qFTWH16-C06-3	C06	21891937	3.92-7.18	2.52-6.44	2,4,5	E3
	qFTWH16-C08-1	C08	24325202	4.24-12.08	3.13-5.51	1,4	E3
	qFTWH16-C09-1	C09	17851812	4.03-8.16	0.00-6.58	2,3,4,5,6	E3
BN	qBNYL13-A01-1	A01	21382905	3.87-9.28	0.56-1.03	2,3	E1
	qBNYL13-A02-1	A02	1803724	3.24-5.68	0.84-1.48	4,5	E1
	qBNYL13-A02-2	A02	3869380	3.91-9.05	0.94-2.45	4,5	E1
	qBNYL13-A02-3	A02	9613197	3.05-3.72	1.46-2.16	1,4	E1
	qBNYL13-A02-4	A02	2688795	4.89-10.75	2.40-5.34	2,3,4,5	E1
	qBNYL13-A03-1	A03	114772	3.61-8.48	2.00-2.12	5,6	E1
	qBNYL13-A03-2	A03	12103354	3.17-7.44	1.47-3.69	2,3,4	E1
	qBNYL13-A04-1	A04	10728950	6.43-6.60	3.17-3.23	3,5	E1
	qBNYL13-A05-1	A05	4048244	4.83-10.93	0.34-0.65	1,2,3,4	E1
	qBNYL13-A06-1	A06	1088628	3.45-6.27	1.45-1.46	2,4	E1
	qBNYL13-A06-2	A06	5716585	3.01-4.42	0.86-2.08	2,3	E1
	qBNYL13-A06-3	A06	9426825	3.82-9.35	2.45-3.43	1,2,3,4,5	E1
	qBNYL13-A08-1	A08	651056	3.36-3.88	1.34-1.95	4,5	E1
	qBNYL13-A08-2	A08	3908757	3.51-8.17	2.91-3.48	2,4	E1
	qBNYL13-A09-1	A09	419723	3.49-10.03	1.09-2.70	2,4	E1
	qBNYL13-A09-2	A09	6726406	5.28-6.45	1.61-2.68	2,3	E1
	qBNYL13-A09-3	A09	24354989	4.44-5.11	1.67-3.18	4,5	E1
	qBNYL13-C01-1	C01	2143316	3.54-3.98	0.08-0.10	4,5	E1
	qBNYL13-C01-2	C01	356325	3.60-6.13	0.64-2.80	2,4,5	E1
	qBNYL13-C01-3	C01	8895671	3.24-9.01	1.44-2.54	2,3,4	E1
	qBNYL13-C01-4	C01	24816783	4.13-8.50	2.61-2.99	2,3,4	E1
	qBNYL13-C02-1	C02	29657905	6.22-6.39	2.04-2.52	2,3	E1
	qBNYL13-C02-2	C02	35286701	3.71-3.82	1.46-2.25	4,5	E1
	qBNYL13-C03-1	C03	35445955	3.69-4.45	1.12-2.34	4,5	E1
	qBNYL13-C03-2	C03	36100463	3.60-4.72	1.32-2.27	4,5	E1
	qBNYL13-C03-3	C03	20422180	3.13-4.25	0.71-1.41	2,3,5	E1
	qBNYL13-C03-4	C03	44848633	3.32-7.91	1.00-4.08	2,3,4,5	E1
	qBNYL13-C04-1	C04	34353806	4.76-5.41	1.61-2.79	4,5	E1
	qBNYL13-C04-2	C04	41438309	3.07-7.95	2.55-3.21	1,3	E1
	qBNYL13-C04-3	C04	47721622	8.39-12.82	5.04-6.14	2,3	E1
	qBNYL13-C04-4	C04	45269010	5.09-12.56	2.69-5.50	2,3,4,5	E1
	qBNYL13-C05-1	C05	9329057	4.71-7.20	2.52-2.99	4,5	E1
	qBNYL13-C05-2	C05	35798978	3.52-3.83	0.45-1.21	1,2	E1
	qBNYL13-C05-3	C05	12985317	5.20-11.01	1.84-3.07	1,2,4	E1
	qBNYL13-C05-4	C05	17761000	4.18-9.68	2.06-5.53	1,3,5	E1
	qBNYL13-C05-5	C05	35799014	3.72-7.11	1.23-2.20	3,4,5	E1
	qBNYL13-C06-1	C06	13368252	4.62-6.54	1.49-2.80	2,3	E1
	qBNYL13-C06-2	C06	4708955	6.18-8.91	2.11-4.13	2,4,5	E1
	qBNYL13-C07-1	C07	37551178	4.43-4.74	0.92-1.55	2,5	E1
	qBNYL13-C07-2	C07	42138837	3.49-6.57	0.44-0.67	2,3	E1
	qBNYL13-C07-3	C07	34759787	4.46-9.63	1.22-3.54	2,3,5	E1
	qBNYL13-C08-1	C08	5782576	6.80-7.78	3.28-4.25	3,4	E1
	qBNYL13-C09-1	C09	12070027	5.84-8.09	2.44-4.03	3,5	E1
	qBNYL13-C09-2	C09	12070048	7.46-12.16	4.26-4.75	2,4	E1
	qBNYL13-C09-3	C09	21827718	3.78-7.16	2.06-2.79	2,3	E1
	qBNYL13-C09-4	C09	42829949	3.31-3.86	0.79-1.09	3,5	E1
	qBNNC14-A01-1	A01	10061197	3.07-7.06	1.58-3.02	2,3,4	E2
	qBNNC14-A01-2	A01	17372622	3.22-8.61	2.02-3.54	2,3,4,5	E2
	qBNNC14-A02-1	A02	13115410	4.05-5.79	0.11-0.15	1,2	E2
	qBNNC14-A03-1	A03	807842	4.47-12.43	4.66-5.33	2,4	E2
	qBNNC14-A03-2	A03	26493470	6.13-10.88	2.62-6.14	2,3,4	E2
	qBNNC14-A04-1	A04	938577	3.38-4.72	1.20-2.58	2,4	E2
	qBNNC14-A05-1	A05	12821937	7.06-8.35	1.22-2.05	2,3	E2
	qBNNC14-A05-2	A05	13790319	3.15-7.00	1.35-2.81	2,3,4	E2
	qBNNC14-A07-1	A07	122548	3.75-9.75	1.09-6.04	1,2,3,4,5	E2
	qBNNC14-A09-1	A09	18743066	4.66-4.87	1.72-2.24	2,3	E2
	qBNNC14-A09-2	A09	25901500	3.07-5.52	1.32-2.23	2,5	E2
	qBNNC14-C02-1	C02	16542494	3.61-6.43	0.95-2.98	3,5	E2
	qBNNC14-C02-2	C02	41187706	6.29-6.59	2.93-2.94	2,3	E2
	qBNNC14-C02-3	C02	30665579	4.03-6.00	1.34-2.04	1,2,4	E2
	qBNNC14-C02-4	C02	37387805	4.55-18.93	2.38-8.18	1,4,5	E2
	qBNNC14-C02-5	C02	38729649	3.95-9.25	1.31-5.81	2,3,4,5	E2
	qBNNC14-C03-1	C03	31349369	3.63-5.50	1.38-3.55	2,4	E2
	qBNNC14-C03-2	C03	48994299	6.73-7.16	3.48-4.42	4,5	E2
	qBNNC14-C03-3	C03	49178906	4.50-7.98	2.25-3.84	2,3	E2
	qBNNC14-C03-4	C03	2553752	4.13-6.69	1.18-2.65	2,3,4	E2
	qBNNC14-C03-5	C03	51474169	3.80-8.99	1.98-3.41	1,2,4	E2
	qBNNC14-C04-1	C04	30428874	4.28-10.14	1.08-3.82	1,2	E2
	qBNNC14-C04-2	C04	36641077	6.05-6.53	2.73-2.97	2,5	E2
	qBNNC14-C04-3	C04	43687102	3.65-5.36	1.55-2.36	1,5	E2
	qBNNC14-C05-1	C05	29202443	7.15-10.24	3.64-7.88	2,4	E2
	qBNNC14-C05-2	C05	7829415	5.10-7.53	1.88-3.52	2,3,4	E2
	qBNNC14-C06-1	C06	27993240	3.49-5.58	0.69-1.06	2,3	E2
	qBNNC14-C06-2	C06	30945618	5.16-5.23	2.21-2.38	2,5	E2
	qBNNC14-C06-3	C06	16925361	3.13-5.08	1.19-2.08	1,3,4,5	E2
	qBNNC14-C06-4	C06	28420758	4.45-5.71	2.32-3.69	1,4,5	E2
	qBNNC14-C07-1	C07	32490997	3.42-4.34	0.59-0.88	2,3	E2
	qBNNC14-C07-2	C07	36411211	4.34-6.27	1.25-3.65	2,4	E2
	qBNNC14-C08-1	C08	18157081	7.09-7.20	2.91-2.97	2,3	E2
	qBNNC14-C08-2	C08	24114714	3.37-8.73	2.17-4.08	2,4,5	E2
	qBNNC14-C09-1	C09	43570432	3.87-9.01	1.17-3.49	2,5	E2
	qBNNC14-C09-2	C09	7540254	7.42-13.93	2.54-4.04	1,2,3,4	E2
	qBNWH16-A01-1	A01	21228528	3.89-5.95	1.83-2.82	4,5	E3
	qBNWH16-A02-1	A02	14110	4.25-6.01	1.31-3.72	3,4	E3
	qBNWH16-A03-1	A03	16344742	3.44-5.32	0.73-1.67	2,4	E3
	qBNWH16-A03-2	A03	16890506	5.21-6.63	2.84-4.01	4,5	E3
	qBNWH16-A04-1	A04	3916422	3.78-5.91	2.43-2.54	1,4	E3
	qBNWH16-A04-2	A04	8367889	3.92-8.81	0.20-1.09	2,5	E3
	qBNWH16-A05-1	A05	8754440	6.23-9.70	2.17-3.61	2,3	E3
	qBNWH16-A05-2	A05	10584051	5.77-12.57	3.45-5.84	2,3,4	E3
	qBNWH16-C01-1	C01	29078022	3.20-4.38	0.83-1.09	2,3	E3
	qBNWH16-C01-2	C01	36443390	3.48-11.96	2.45-3.95	1,4	E3
	qBNWH16-C02-1	C02	44049838	3.06-4.19	0.51-1.70	1,3,5	E3
	qBNWH16-C03-1	C03	14506182	3.70-8.50	2.29-3.17	2,4	E3
	qBNWH16-C03-2	C03	4243695	3.72-11.65	1.99-4.92	2,3,5	E3
	qBNWH16-C03-3	C03	40316564	3.25-7.00	1.21-3.66	2,3,4,5	E3
	qBNWH16-C04-1	C04	7184727	3.67-6.75	1.60-5.62	1,2,4	E3
	qBNWH16-C04-2	C04	8445653	3.07-7.15	1.99-2.99	2,3,4	E3
	qBNWH16-C05-1	C05	17760973	3.03-3.68	1.70-2.56	4,5	E3
	qBNWH16-C05-2	C05	35538059	3.08-4.25	0.53-1.36	2,3	E3
	qBNWH16-C05-3	C05	1006794	3.85-5.83	1.31-2.47	1,2,3,	E3
	qBNWH16-C06-1	C06	4242278	3.94-4.99	0.73-1.59	2,4	E3
	qBNWH16-C06-2	C06	10323110	3.74-4.05	0.52-0.93	2,3	E3
	qBNWH16-C06-3	C06	4978698	5.22-7.61	2.02-3.11	1,2,3,4,5	E3
	qBNWH16-C08-1	C08	13003476	3.47-3.75	1.07-1.10	4,5	E3
	qBNWH16-C08-2	C08	25243813	4.31-10.90	1.53-5.04	2,3,4	E3
	qBNWH16-C09-1	C09	22522499	3.79-4.35	1.48-1.87	1,5	E3
	qBNWH16-C09-2	C09	44997334	3.19-7.51	1.03-3.54	2,4	E3
	qBNWH16-C09-3	C09	14534126	3.79-5.95	1.42-2.49	1,2,3	E3
	qBNWH16-C09-4	C09	30688762	3.96-6.85	1.53-5.76	2,3,4,5	E3
SI	qSIYL13-A01-1	A01	13494572	4.86-7.33	1.88-2.78	2,5	E1
	qSIYL13-A01-2	A01	20118558	3.25-4.90	0.45-1.24	2,3,5	E1
	qSIYL13-A01-3	A01	21122950	3.67-7.27	0.51-1.51	2,4,5	E1
	qSIYL13-A02-1	A02	227093	3.86-6.05	0.85-1.74	2,5	E1
	qSIYL13-A04-1	A04	394368	3.37-4.63	0.55-1.85	3,5	E1
	qSIYL13-A04-2	A04	10239639	3.59-9.51	1.10-3.98	1,2,4,5	E1
	qSIYL13-A06-1	A06	11197665	4.23-6.88	1.20-4.22	1,3,4,5	E1
	qSIYL13-A06-2	A06	16895263	3.29-7.04	0.51-1.53	2,3,5	E1
	qSIYL13-A07-1	A07	13927487	4.96-7.43	1.68-2.67	2,4,5	E1
	qSIYL13-A08-1	A08	4765883	3.13-7.92	0.00-3.13	1,3	E1
	qSIYL13-A08-2	A08	10445159	3.39-4.51	1.01-1.49	2,4	E1
	qSIYL13-A09-1	A09	8678778	4.57-5.84	1.44-3.03	1,3,4	E1
	qSIYL13-A09-2	A09	23327461	4.13-5.23	0.89-2.47	2,4	E1
	qSIYL13-C01-1	C01	9717667	3.62-6.46	1.73-2.24	3,4	E1
	qSIYL13-C02-1	C02	30676392	5.44-7.88	0.93-2.29	1,3	E1
	qSIYL13-C03-1	C03	11580401	3.04-4.78	0.49-2.20	3,5	E1
	qSIYL13-C03-2	C03	13513425	3.27-5.30	0.59-1.90	2,3,4	E1
	qSIYL13-C03-3	C03	23705441	5.45-7.99	2.27-2.92	1,5	E1
	qSIYL13-C03-4	C03	28314136	3.73-8.61	0.31-0.68	2,5	E1
	qSIYL13-C03-5	C03	33618186	3.18-7.98	0.35-1.53	2,3	E1
	qSIYL13-C03-6	C03	37988891	4.76-11.50	1.52-4.22	1,2,3,4,5	E1
	qSIYL13-C04-1	C04	12516309	3.94-6.27	1.26-3.54	4,5	E1
	qSIYL13-C04-2	C04	13609719	3.73-5.73	1.07-2.14	2,3,4,5	E1
	qSIYL13-C04-3	C04	24303215	3.23-4.77	0.63-1.73	1,2,3,5	E1
	qSIYL13-C04-4	C04	31878512	4.38-9.16	1.50-3.76	1,2,5	E1
	qSIYL13-C04-5	C04	31945763	3.91-5.23	0.87-3.76	3,4,5	E1
	qSIYL13-C04-6	C04	34909561	3.55-6.52	0.91-1.76	2,3,5	E1
	qSIYL13-C04-7	C04	38021034	3.10-4.10	1.13-1.81	2,4	E1
	qSIYL13-C05-1	C05	7985979	4.71-12.46	3.31-6.02	2,4	E1
	qSIYL13-C05-2	C05	16477066	6.63-11.43	2.18-4.47	2,5	E1
	qSIYL13-C05-3	C06	837138	4.36-7.10	1.48-3.49	2,4	E1
	qSIYL13-C06-1	C06	1520394	4.62-9.30	1.32-3.76	2,3,4,5	E1
	qSIYL13-C06-2	C06	17641450	4.00-5.58	0.96-3.63	2,3,4,5	E1
	qSIYL13-C06-3	C06	18615458	3.09-6.82	0.63-2.28	2,3	E1
	qSIYL13-C07-1	C07	387622	4.85-8.48	1.38-3.45	2,3,4,5	E1
	qSIYL13-C07-2	C07	1083641	4.40-5.41	1.45-2.01	1,2	E1
	qSIYL13-C07-3	C07	4930603	3.52-6.76	1.43-1.82	2,3,4	E1
	qSIYL13-C07-4	C07	13019594	4.59-9.98	1.26-4.65	1,5	E1
	qSIYL13-C07-5	C07	16531116	3.76-6.13	1.29-1.95	1,5	E1
	qSIYL13-C07-6	C07	19712739	3.53-5.44	1.47-1.84	1,3	E1
	qSIYL13-C08-1	C08	6217737	4.25-4.60	1.56-2.41	2,4	E1
	qSIYL13-C08-2	C08	9234710	3.15-6.75	0.57-2.67	1,2,3,4,5	E1
	qSIYL13-C08-3	C08	34036961	5.47-8.96	2.02-4.01	2,4,5	E1
	qSIYL13-C08-4	C08	34760900	3.40-7.51	1.74-3.08	1,2,4	E1
	qSIYL13-C09-1	C09	9987034	4.72-4.76	1.53-2.87	2,4	E1
	qSIYL13-C09-2	C09	42047318	3.53-11.26	2.12-5.23	2,4	E1
	qSIYL13-C09-3	C09	42532993	4.64-6.58	0.81-2.82	2,3,5	E1
	qSIYL13-C09-4	C09	42705598	4.06-7.10	3.04-3.40	4,5	E1
	qSINC14-A01-1	A01	13494451	5.99-6.09	1.66-1.91	2,3	E2
	qSINC14-A02-1	A02	24401109	4.20-7.63	1.73-3.09	1,2,3,4,5	E2
	qSINC14-A02-2	A02	24406452	8.20-11.74	3.45-4.30	2,3,4,5	E2
	qSINC14-A03-1	A03	10941148	6.47-9.03	2.77-3.37	2,3	E2
	qSINC14-A05-1	A05	18890665	5.91-7.92	2.71-4.04	4,5	E2
	qSINC14-A07-1	A07	7440971	3.54-10.30	2.36-4.56	2,3,4	E2
	qSINC14-A07-2	A07	21764266	3.37-4.58	0.91-4.30	2,4	E2
	qSINC14-A09-1	A09	33364708	4.24-7.69	1.65-3.18	1,2,3,5	E2
	qSINC14-C01-1	C01	4573601	6.30-6.63	2.42-2.58	1,5	E2
	qSINC14-C01-2	C01	4607053	3.34-9.01	2.23-3.68	2,4,5	E2
	qSINC14-C01-3	C01	18454460	4.31-5.73	1.30-1.82	2,3	E2
	qSINC14-C01-4	C01	25167140	5.10-6.50	1.63-1.98	2,3	E2
	qSINC14-C01-5	C01	26354384	3.62-5.23	0.85-1.03	2,3	E2
	qSINC14-C02-1	C02	16019162	3.41-8.08	1.92-3.15	3,4,5	E2
	qSINC14-C03-1	C03	6711	5.05-5.24	2.13-2.17	2,5	E2
	qSINC14-C03-2	C03	3322010	5.08-5.61	1.39-2.20	1,5	E2
	qSINC14-C03-3	C03	12205472	3.28-8.77	1.19-2.64	2,4,5	E2
	qSINC14-C03-4	C03	18843619	3.82-4.65	1.06-1.81	3,4	E2
	qSINC14-C03-5	C03	21828785	3.50-5.00	1.03-2.84	2,3,4	E2
	qSINC14-C03-6	C03	24559431	3.80-6.13	1.51-2.91	2,3,4	E2
	qSINC14-C03-7	C03	57209811	5.98-8.41	2.08-3.65	1,5	E2
	qSINC14-C04-1	C04	6728645	5.91-14.05	1.93-6.06	1,2,3,4	E2
	qSINC14-C04-2	C04	40519449	3.71-8.30	3.08-3.80	1,4	E2
	qSINC14-C05-1	C05	1767932	3.76-3.94	1.16-2.44	1,5	E2
	qSINC14-C05-2	C05	6931675	4.19-9.17	0.92-2.32	2,3,5	E2
	qSINC14-C05-3	C05	12961196	3.79-8.98	0.97-3.50	2,5	E2
	qSINC14-C05-4	C05	13209352	5.47-13.04	2.03-4.76	2,3,5	E2
	qSINC14-C06-1	C06	3220112	4.17-7.52	1.29-3.87	2,4	E2
	qSINC14-C06-2	C06	4628473	5.30-12.77	2.24-5.44	2,3,4,5	E2
	qSINC14-C06-3	C06	13629116	3.81-9.72	2.22-4.05	4,5	E2
	qSINC14-C06-4	C06	22456415	4.40-9.27	0.48-1.59	2,3,4	E2
	qSINC14-C06-5	C06	23582095	4.28-8.19	1.62-2.85	3,5	E2
	qSINC14-C07-1	C07	9017402	3.95-4.62	1.50-2.64	3,4	E2
	qSINC14-C07-2	C07	9350044	3.67-6.99	1.30-2.57	2,5	E2
	qSINC14-C07-3	C07	19361423	3.89-4.27	1.30-1.33	3,5	E2
	qSINC14-C08-1	C08	14541163	3.22-8.88	1.17-3.79	1,2	E2
	qSINC14-C08-2	C08	31169672	3.37-5.38	1.37-3.29	2,4	E2
	qSINC14-C09-1	C09	4341142	5.47-6.39	1.60-1.95	2,3,5	E2
	qSINC14-C09-2	C09	13004062	5.66-18.90	2.24-7.96	1,2,3,4	E2
	qSINC14-C09-3	C09	36398933	5.88-6.93	2.65-3.98	3,4	E2
	qSINC14-C09-4	C09	43317669	5.03-5.51	1.89-1.90	2,3	E2
	qSIWH16-A01-1	A01	21380473	3.07-7.82	0.46-3.18	3,4,5	E3
	qSIWH16-A02-1	A02	1615609	4.53-8.22	1.40-1.65	2,3	E3
	qSIWH16-A02-2	A02	1777012	5.67-12.24	1.41-2.56	2,3,4,5	E3
	qSIWH16-A03-1	A03	14896	3.62-5.12	0.47-1.30	2,3,5	E3
	qSIWH16-A04-1	A04	555388	4.44-7.97	1.08-1.42	2,3	E3
	qSIWH16-A05-1	A05	14397803	3.29-7.75	1.39-3.50	2,3,4	E3
	qSIWH16-A05-2	A05	21803821	3.15-4.66	0.33-1.25	2,3	E3
	qSIWH16-A06-1	A06	12684426	3.54-10.32	1.68-4.97	1,2,3,4,5	E3
	qSIWH16-A06-2	A06	13709248	3.37-3.96	0.88-1.06	3,5	E3
	qSIWH16-A07-1	A07	12693130	4.45-5.92	1.07-1.27	2,3	E3
	qSIWH16-A08-1	A08	345035	3.68-6.21	1.61-2.52	2,3,4	E3
	qSIWH16-A08-2	A08	4572690	6.07-11.80	1.21-4.98	2,3,4,5	E3
	qSIWH16-A08-3	A08	15421845	4.64-8.06	1.41-2.24	1,2,3,4,5	E3
	qSIWH16-A09-1	A09	30309505	5.25-8.69	1.81-3.79	2,3,4,5	E3
	qSIWH16-A10-1	A10	915307	3.09-3.33	0.69-1.87	3,4	E3
	qSIWH16-C01-1	C01	10888198	7.01-11.70	3.20-5.46	2,3,4,5	E3
	qSIWH16-C01-2	C01	14516971	3.87-10.38	0.71-4.60	2,3,4,5	E3
	qSIWH16-C01-3	C01	37883031	3.57-3.63	0.53-2.45	3,4	E3
	qSIWH16-C02-1	C02	15059835	4.29-17.47	1.57-6.12	2,4,5	E3
	qSIWH16-C03-1	C03	20224423	4.13-5.87	1.78-2.98	2,4,5	E3
	qSIWH16-C03-2	C03	22767136	3.07-6.32	0.27-2.16	1,2,3,4,5	E3
	qSIWH16-C03-3	C03	33748011	6.13-10.30	3.83-4.85	2,4,5	E3
	qSIWH16-C03-4	C03	34092824	4.19-9.40	1.82-4.03	2,3,4,5	E3
	qSIWH16-C03-5	C03	50358921	5.32-6.68	2.84-2.85	2,4	E3
	qSIWH16-C04-1	C04	2630875	5.99-19.99	1.83-8.61	2,3,4,5	E3
	qSIWH16-C04-2	C04	25634167	5.12-10.89	1.05-4.63	2,3,5	E3
	qSIWH16-C04-3	C04	37004287	4.88-12.23	2.76-5.45	1,4	E3
	qSIWH16-C07-1	C07	4594661	3.08-3.90	0.48-2.39	3,4	E3
	qSIWH16-C07-2	C07	6023726	4.21-8.39	2.29-3.56	2,4,5	E3
	qSIWH16-C07-3	C07	28231465	4.39-11.06	2.06-4.37	1,2,3,4,5	E3
	qSIWH16-C07-4	C07	38015178	3.27-8.42	1.00-1.53	3,4	E3
	qSIWH16-C08-1	C08	4477146	4.01-6.38	2.55-2.79	1,4	E3
	qSIWH16-C08-2	C08	29925771	4.04-7.30	1.13-2.54	1,2,3,4,5	E3
	qSIWH16-C09-1	C09	7123409	3.48-5.13	0.74-2.09	1,2	E3
	qSIWH16-C09-2	C09	32484566	4.42-6.57	1.09-3.30	2,3,4,5	E3
	qSIWH16-C09-3	C09	40430053	6.22-7.61	0.81-2.19	2,3	E3
	qSIWH16-C09-4	C09	40430155	3.22-5.23	0.71-2.04	3,4	E3
SN	qSNYL13-A01-1	A01	8952393	3.38-10.61	2.52-3.94	2,3,4,5	E1
	qSNYL13-A01-2	A01	10310739	3.51-3.71	0.55-1.14	2,4	E1
	qSNYL13-A01-3	A01	18292039	4.65-12.32	2.01-4.1	2,4	E1
	qSNYL13-A02-1	A02	2259254	6.21-7.81	2.49-5.14	2,3,4	E1
	qSNYL13-A02-2	A02	13065894	4.29-5.52	1.00-1.89	2,4,5	E1
	qSNYL13-A03-1	A03	3451064	5.46-6.48	1.79-2.65	1,2	E1
	qSNYL13-A03-2	A03	10120369	5.91-10.91	1.57-2.93	2,3,5	E1
	qSNYL13-A03-3	A03	13720368	4.04-7.78	0.57-2.13	3,4	E1
	qSNYL13-A04-1	A04	2852969	5.44-9.76	1.28-3.08	2,3,5,6	E1
	qSNYL13-A04-2	A04	4263431	3.81-4.39	1.85-2.42	4,5	E1
	qSNYL13-A04-3	A04	12681911	6.61-6.65	1.76-2.36	2,3	E1
	qSNYL13-A08-1	A08	4607211	4.87-5.66	2.02-2.06	3,5	E1
	qSNYL13-A08-2	A08	4766142	5.32-8.05	1.41-3.16	2,3	E1
	qSNYL13-A08-3	A08	5193792	4.10-6.50	0.94-2.64	4,5	E1
	qSNYL13-A08-4	A08	12039861	4.72-6.33	1.90-2.17	3,4	E1
	qSNYL13-A09-1	A09	24005491	4.59-7.15	0.64-2.48	5,6	E1
	qSNYL13-A10-1	A10	3193647	3.99-7.09	1.41-2.36	1,3,5	E1
	qSNYL13-C01-1	C01	13822736	6.36-8.39	3.31-4.52	1,3,5	E1
	qSNYL13-C02-1	C02	34148008	3.08-11.32	0.62-4.00	1,2	E1
	qSNYL13-C02-2	C02	43873219	5.62-6.37	2.30-3.32	2,3	E1
	qSNYL13-C03-1	C03	6528064	4.21-5.00	1.19-1.58	2,3,5	E1
	qSNYL13-C03-2	C03	20816909	7.81-9.38	4.41-6.22	4,5	E1
	qSNYL13-C03-3	C03	23602183	5.44-11.33	2.36-5.20	2,3,4	E1
	qSNYL13-C03-4	C03	32556947	3.71-6.20	1.44-3.74	2,3,4,5	E1
	qSNYL13-C03-5	C03	44834735	3.80-5.45	0.56-1.50	2,3	E1
	qSNYL13-C04-1	C04	7464315	3.25-6.41	1.40-2.16	2,3,5	E1
	qSNYL13-C04-2	C04	37117279	4.40-7.97	1.53-2.92	1,2,5	E1
	qSNYL13-C06-1	C06	22847301	3.75-5.07	1.51-3.71	3,4	E1
	qSNYL13-C06-2	C06	23969137	5.14-5.36	2.54-3.33	3,6	E1
	qSNYL13-C07-1	C07	7384882	4.06-4.81	2.09-2.97	3,4	E1
	qSNYL13-C07-2	C07	14903186	5.30-10.29	2.21-2.68	2,4,5	E1
	qSNYL13-C07-3	C07	33921898	3.50-14.52	3.31-5.48	2,3,4	E1
	qSNYL13-C08-1	C08	1808344	4.44-6.11	1.24-1.64	2,5	E1
	qSNYL13-C08-2	C08	2559721	6.63-12.41	2.83-10.26	2,3,4,5	E1
	qSNYL13-C08-3	C08	24951217	3.77-6.34	2.00-3.48	2,3,4	E1
	qSNNC14-A01-1	A01	18990267	5.94-6.16	1.77-1.81	4,5	E2
	qSNNC14-A02-1	A02	83509	3.96-11.55	1.74-4.42	2,3,4,5	E2
	qSNNC14-A02-2	A02	1455661	3.70-8.53	2.60-3.76	1,2,3,4,5,6	E2
	qSNNC14-A02-3	A02	13595586	5.59-8.57	2.44-2.85	2,3,5	E2
	qSNNC14-A02-4	A02	16991651	3.54-6.06	1.33-2.61	2,3,5	E2
	qSNNC14-A02-5	A02	23105706	4.74-9.68	1.72-4.96	2,4,5	E2
	qSNNC14-A04-1	A04	3958264	3.27-5.66	2.07-2.72	2,4	E2
	qSNNC14-A05-1	A05	3654390	4.15-9.12	1.58-3.07	2,3,5	E2
	qSNNC14-A05-2	A05	17387486	3.47-6.04	0.70-1.92	1,5	E2
	qSNNC14-A05-3	A05	19248125	6.71-7.43	1.51-1.69	2,3	E2
	qSNNC14-A06-1	A06	10393794	5.39-6.12	1.40-2.10	2,3	E2
	qSNNC14-A06-2	A06	23659378	8.91-9.60	4.30-4.36	4,5	E2
	qSNNC14-A07-1	A07	4839921	3.24-8.59	0.47-2.13	2,3	E2
	qSNNC14-A09-1	A09	23970439	5.24-10.46	2.02-3.23	2,3,5	E2
	qSNNC14-A09-2	A09	27195252	4.25-5.68	0.00-1.51	1,2,5,6	E2
	qSNNC14-A09-3	A09	29885969	3.61-8.60	1.44-3.98	4,5	E2
	qSNNC14-C01-1	C01	6139759	5.72-10.31	2.38-4.71	1,2,3,4,5	E2
	qSNNC14-C01-2	C01	10445944	5.85-7.72	2.18-3.21	2,3	E2
	qSNNC14-C02-1	C02	21793561	3.10-3.50	1.34-1.99	2,4	E2
	qSNNC14-C02-2	C02	26933648	3.72-4.43	1.18-1.91	2,3	E2
	qSNNC14-C02-3	C02	29249150	4.53-5.73	1.35-2.57	1,3	E2
	qSNNC14-C03-1	C03	29367638	4.51-5.03	1.28-1.96	3,5	E2
	qSNNC14-C04-1	C04	21774489	5.43-7.97	1.23-3.09	4,5	E2
	qSNNC14-C04-2	C04	24085887	5.67-10.04	2.42-5.64	1,3,4,5	E2
	qSNNC14-C04-3	C04	28360335	5.67-11.89	3.18-5.99	2,4,5	E2
	qSNNC14-C05-1	C05	16832855	3.42-10.50	2.13-5.31	2,4,5	E2
	qSNNC14-C05-2	C05	18193184	3.50-5.16	0.09-0.27	1,2,4,5	E2
	qSNNC14-C05-3	C05	24657467	3.92-5.63	2.55-2.95	4,5	E2
	qSNNC14-C05-4	C05	29349165	5.38-12.38	2.15-5.70	1,2,3,4,5	E2
	qSNNC14-C05-5	C05	32335309	4.26-4.84	1.58-1.88	1,3	E2
	qSNNC14-C05-6	C05	42405720	4.23-7.24	1.10-1.55	1,5	E2
	qSNNC14-C06-1	C06	13960751	3.85-4.74	1.64-2.59	2,4,5	E2
	qSNNC14-C07-1	C07	321242	3.47-6.55	1.16-3.05	1,3,5	E2
	qSNNC14-C07-2	C07	2456768	3.19-4.77	1.23-2.73	1,4	E2
	qSNNC14-C07-3	C07	3183504	4.18-6.15	1.32-2.43	1,2,4,5	E2
	qSNNC14-C07-4	C07	5240755	3.72-6.12	1.89-3.03	2,4,5	E2
	qSNNC14-C07-5	C07	19358642	3.17-5.66	1.00-2.61	3,4,5	E2
	qSNNC14-C07-6	C07	38864350	8.00-11.54	2.70-5.08	2,3	E2
	qSNNC14-C08-1	C08	14224594	5.39-7.08	1.86-4.06	4,5,	E2
	qSNNC14-C09-1	C09	2409995	3.12-5.63	1.16-2.37	1,2,3,4,5	E2
	qSNNC14-C09-2	C09	9330294	3.02-3.10	0.60-1.01	3,5	E2
	qSNNC14-C09-3	C09	21989748	5.76-12.11	2.54-5.93	2,3,4	E2
	qSNNC14-C09-4	C09	23597640	4.04-4.37	1.07-1.74	1,2	E2
	qSNNC14-C09-5	C09	11236617	6.51-9.86	3.23-3.96	1,2,3，	E2
	qSNNC14-C09-6	C09	16839183	4.55-9.55	128-4.06	2,4,5	E2
	qSNNC14-C09-7	C09	20774003	3.19-5.58	0.88-2.36	2,4,5	E2
	qSNWH16-A01-1	A01	9772921	3.63-4.87	1.39-1.92	1,3	E3
	qSNWH16-A01-2	A01	18096025	5.20-6.24	0.97-1.01	1,2	E3
	qSNWH16-A02-1	A02	1231065	3.02-3.85	1.18-1.69	4,5	E3
	qSNWH16-A02-2	A02	7096534	5.69-7.41	1.43-2.41	4,5	E3
	qSNWH16-A03-1	A03	576788	6.16-7.63	2.11-2.23	2,3	E3
	qSNWH16-A03-2	A03	24389609	3.38-5.31	1.55-2.63	2,3,4,5	E3
	qSNWH16-A04-1	A04	788606	7.23-14.33	1.62-3.16	2,3,4	E3
	qSNWH16-A04-2	A04	11820732	3.68-9.55	1.07-2.60	1,2,3,4	E3
	qSNWH16-A04-3	A04	17333487	4.39-6.99	2.24-2.74	2,3,4	E3
	qSNWH16-A05-1	A05	765180	3.09-3.32	0.49-0.56	2,3	E3
	qSNWH16-A05-2	A05	8453656	3.14-7.69	0.14-1.00	1,2,3	E3
	qSNWH16-A05-3	A05	11094754	4.68-4.68	0.84-2.20	1,3	E3
	qSNWH16-A06-1	A06	10956987	3.38-9.69	1.68-5.63	1,2,3,4	E3
	qSNWH16-A06-2	A06	19798661	3.81-4.71	1.39-2.43	3,5	E3
	qSNWH16-A06-3	A06	19798667	5.15-9.80	2.20-4.47	2,4	E3
	qSNWH16-A09-1	A09	2366673	3.16-10.46	0.92-3.84	1,2,3	E3
	qSNWH16-C01-1	C01	11520135	3.84-5.08	0.00-2.23	1,5,6	E3
	qSNWH16-C01-2	C01	32678245	7.00-9.94	0.61-1.30	1,2,3	E3
	qSNWH16-C01-3	C01	38414612	3.26-25.34	2.02-12.89	1,2,3,4,5,6	E3
	qSNWH16-C02-1	C02	28710399	5.11-7.01	1.72-2.88	3,4,5	E3
	qSNWH16-C03-1	C03	6528756	6.08-6.73	4.06-4.36	4,5	E3
	qSNWH16-C03-2	C03	18058136	3.11-5.80	0.69-2.27	4,5	E3
	qSNWH16-C03-3	C03	18071865	4.29-9.95	1.34-4.77	1,2,3	E3
	qSNWH16-C03-4	C03	20103462	3.18-10.98	2.05-5.01	4,5	E3
	qSNWH16-C03-5	C03	27891172	4.44-4.90	1.41-2.17	1,2	E3
	qSNWH16-C03-6	C03	52032078	4.72-6.46	2.24-3.30	1,5	E3
	qSNWH16-C04-1	C04	2345865	5.28-11.98	1.72-5.74	1,2,3,4,5,	E3
	qSNWH16-C04-2	C04	34354049	3.63-5.85	1.08-3.01	2,3	E3
	qSNWH16-C06-1	C06	1069469	3.74-4.04	1.32-1.93	4,5	E3
	qSNWH16-C06-2	C06	4849217	5.09-5.29	1.82-2.51	1,2	E3
	qSNWH16-C06-3	C06	14647381	4.26-7.57	1.76-3.24	2,3,4,5	E3
	qSNWH16-C06-4	C06	20172330	3.28-4.96	0.83-2.81	1,2,3,4,5	E3
	qSNWH16-C06-5	C06	23333526	3.95-8.47	0.99-3.36	1,2,3	E3
	qSNWH16-C07-1	C07	826238	3.23-4.16	1.14-1.51	1,3	E3
	qSNWH16-C07-2	C07	3019188	4.02-6.54	0.92-2.52	2,3,4	E3
	qSNWH16-C07-3	C07	4239248	4.98-5.94	1.66-2.37	1,3	E3
	qSNWH16-C07-4	C07	5861946	9.94-10.61	3.76-5.56	1,2,3	E3
	qSNWH16-C07-5	C07	16925805	3.99-10.52	3.31-3.55	3,4,5	E3
	qSNWH16-C07-6	C07	22546983	5.80-8.38	1.92-2.92	2,4	E3
	qSNWH16-C07-7	C07	22546984	3.19-6.27	0.62-1.50	3,5	E3
	qSNWH16-C07-8	C07	26981729	3.05-4.08	0.63-1.49	2,3	E3
	qSNWH16-C07-9	C07	38864350	8.00-11.54	2.70-5.08	2,3	E3
	qSNWH16-C08-1	C08	14224594	5.39-7.08	1.86-4.06	4,5,	E3
	qSNWH16-C09-1	C09	11236617	6.51-9.86	3.23-3.96	1,2,3，	E3
	qSNWH16-C09-2	C09	16839183	4.55-9.55	128-4.06	2,4,5	E3
	qSNWH16-C09-3	C09	20774003	3.19-5.58	0.88-2.36	2,4,5	E3
SP	qSPYL13-A01-1	A01	7018850	6.49-8.38	2.81-4.24	4,5	E1
	qSPYL13-A01-2	A01	11556133	4.42-6.37	2.20-2.79	3,5	E1
	qSPYL13-A01-3	A01	21432094	4.22-4.43	1.95-2.01	1,2	E1
	qSPYL13-A02-1	A02	566056	6.52-11.38	2.96-6.74	2,3,4,5	E1
	qSPYL13-A03-1	A03	13972274	3.14-3.63	0.44-0.75	2,4	E1
	qSPYL13-A03-2	A03	15505762	4.32-4.78	1.13-1.75	1,2	E1
	qSPYL13-A04-1	A04	3634020	3.00-3.53	0.88-1.41	2,5	E1
	qSPYL13-A05-1	A05	11823270	5.60-5.65	3.44-5.95	2,4	E1
	qSPYL13-A05-2	A05	20286641	3.11-4.11	0.88-1.50	2,3	E1
	qSPYL13-A08-1	A08	1376196	3.82-4.75	4.57-5.53	2,3,4	E1
	qSPYL13-A09-1	A09	27841314	4.09-5.03	1.49-2.07	2,5	E1
	qSPYL13-C01-1	C01	28135129	4.57-10.20	1.55-4.67	2,3	E1
	qSPYL13-C02-1	C02	8005746	4.75-6.55	2.04-2.44	2,5	E1
	qSPYL13-C02-2	C02	14802705	3.22-5.37	1.17-4.40	2,3,4	E1
	qSPYL13-C03-1	C03	9013194	6.57-11.50	5.12-5.69	4,5	E1
	qSPYL13-C03-2	C03	17932082	5.29-6.12	2.24-5.24	1,2,3,5	E1
	qSPYL13-C03-3	C03	20383585	6.59-8.04	2.87-5.25	4,5	E1
	qSPYL13-C03-4	C03	45350351	3.45-5.06	0.78-1.73	1,3	E1
	qSPYL13-C03-5	C03	59680513	6.15-7.02	1.97-3.23	3,5	E1
	qSPYL13-C04-1	C04	9333971	3.12-5.37	0.99-2.42	1,2	E1
	qSPYL13-C05-1	C05	17115779	4.68-4.91	1.71-2.15	1,3	E1
	qSPYL13-C05-2	C05	32085211	4.05-4.20	1.60-1.78	2,5	E1
	qSPYL13-C06-1	C06	16824981	4.21-10.42	1.48-3.96	3,5	E1
	qSPYL13-C06-2	C06	25604517	3.13-5.58	0.77-3.07	1,3,4	E1
	qSPYL13-C06-3	C06	30945572	3.15-6.11	0.63-1.75	1,3	E1
	qSPYL13-C06-4	C06	35530461	806-10.43	2.27-3.28	1,3	E1
	qSPYL13-C07-1	C07	1274305	3.27-4.01	0.90-1.34	1,3	E1
	qSPYL13-C07-2	C07	5777117	3.39-6.30	0.85-2.62	1,3	E1
	qSPYL13-C07-3	C07	16002136	3.26-9.94	2.17-5.32	1,2,3,4	E1
	qSPYL13-C07-4	C07	29600216	3.36-8.93	1.25-4.38	2,5	E1
	qSPYL13-C07-5	C07	39589654	4.30-5.30	1.85-2.13	2,3	E1
	qSPYL13-C08-1	C08	5846584	3.62-5.47	0.53-0.63	3,5	E1
	qSPYL13-C08-2	C08	27089068	4.01-4.16	1.25-1.43	2,3	E1
	qSPYL13-C09-1	C09	25836173	3.13-11.90	3.46-5.67	2,3,4,5	E1
	qSPNC14-A01-1	A01	21453605	7.02-9.15	1.38-2.40	2,3	E2
	qSPNC14-A02-1	A02	14549145	3.05-8.44	0.00-1.27	1,2,3	E2
	qSPNC14-A03-1	A03	3275253	8.24-11.91	2.45-3.44	1,2,3,4	E2
	qSPNC14-A03-2	A03	12084936	8.32-13.56	1.30-1.85	2,3,4,5	E2
	qSPNC14-A03-3	A03	16567839	3.07-4.75	0.30-1.39	2,5	E2
	qSPNC14-A04-1	A04	12100287	3.30-4.21	0.62-1.17	2,5	E2
	qSPNC14-A04-2	A04	13129515	3.78-8.07	1.65-2.61	2,3	E2
	qSPNC14-A07-1	A07	23786874	4.21-6.23	1.66-2.89	3,4	E2
	qSPNC14-C01-1	C01	3181650	3.85-5.38	1.33-1.52	2,3	E2
	qSPNC14-C01-2	C01	8843202	3.37-4.11	1.44-2.78	2,3,4	E2
	qSPNC14-C01-3	C01	33484981	3.27-7.47	1.25-4.83	2,3,4,5	E2
	qSPNC14-C01-4	C01	36081628	3.65-10.68	1.65-5.21	2,3,4,5	E2
	qSPNC14-C02-1	C02	16856888	4.84-11.34	2.66-5.48	1,2,3,4	E2
	qSPNC14-C02-2	C02	17588664	5.84-14.68	1.93-8.96	1,2,3,4,5	E2
	qSPNC14-C02-3	C02	19888120	3.61-8.49	1.25-2.80	2,3,4	E2
	qSPNC14-C02-4	C02	31128192	3.53-4.53	1.90-2.35	4,5	E2
	qSPNC14-C03-1	C03	24266571	3.26-7.06	0.16-1.57	1,2,3	E2
	qSPNC14-C03-2	C03	31339715	4.03-8.30	2.14-4.80	1,2,3,4,5	E2
	qSPNC14-C03-3	C03	45646165	4.59-7.90	0.36-0.68	2,3,4	E2
	qSPNC14-C04-1	C04	3844739	4.67-23.88	0.69-3.86	1,2	E2
	qSPNC14-C04-2	C04	41368755	3.40-13.51	0.75-2.28	1,2,5	E2
	qSPNC14-C05-1	C05	6508287	3.54-6.57	1.07-2.42	1,2,3	E2
	qSPNC14-C05-2	C05	16418852	7.91-11.84	3.74-4.96	2,3,4,5	E2
	qSPNC14-C05-3	C05	30996771	3.68-4.13	1.46-1.62	2,3	E2
	qSPNC14-C05-4	C05	34884649	3.31-4.45	1.52-2.01	2,4,5	E2
	qSPNC14-C06-1	C06	14816079	3.64-4.05	1.47-3.55	2,4	E2
	qSPNC14-C07-1	C07	130585	3.65-6.88	1.67-3.85	3,4,5	E2
	qSPNC14-C07-2	C07	12408675	3.53-5.62	1.35-1.55	3,4	E2
	qSPNC14-C07-3	C07	13552469	3.75-7.74	1.63-3.93	2,3,4,5	E2
	qSPNC14-C07-4	C07	39755155	5.25-6.58	1.87-3.64	2,4	E2
	qSPNC14-C08-1	C08	8207984	7.29-9.92	3.79-5.22	2,3,4,5	E2
	qSPNC14-C08-2	C08	33401941	3.40-4.70	1.26-2.34	2,3	E2
	qSPNC14-C09-1	C09	12357331	10.12-10.88	2.27-2.74	1,2	E2
	qSPNC14-C09-2	C09	24974617	3.45-6.37	1.45-3.28	2,3,4	E2
	qSPNC14-C09-3	C09	40125524	3.50-9.33	1.20-2.38	2,3,4	E2
	qSPNC14-C09-4	C09	44919935	5.66-8.17	2.39-3.70	2,4,5	E2
	qSPNC14-C09-5	C09	48293393	3.69-7.21	2.54-2.74	2,4	E2
	qSPWH16-A02-1	A02	2493428	4.70-6.47	1.41-2.25	1,2,5	E3
	qSPWH16-A04-1	A04	10321047	5.03-5.64	2.53-3.25	4,5	E3
	qSPWH16-A04-2	A04	11913667	5.09-6.62	2.78-4.50	2,4,5	E3
	qSPWH16-A04-3	A04	12888573	3.67-6.60	0.31-1.44	2,3	E3
	qSPWH16-A05-1	A05	2127090	3.62-7.00	0.30-1.27	2,3	E3
	qSPWH16-A05-2	A05	18067824	7.07-12.04	2.37-3.35	1,3	E3
	qSPWH16-A05-3	A05	18155345	3.48-8.79	1.53-4.26	1,2,4,5	E3
	qSPWH16-A05-4	A05	20816472	3.21-9.27	1.16-1.94	3,4,5	E3
	qSPWH16-A06-1	A06	5643971	4.26-13.76	1.49-2.78	2,3	E3
	qSPWH16-A07-1	A07	11188274	5.02-11.36	1.45-2.14	1,2,3,5	E3
	qSPWH16-A07-2	A07	13520938	4.01-5.19	0.79-1.76	4,5	E3
	qSPWH16-A07-3	A07	13532852	9.04-10.09	1.13-3.05	2,3	E3
	qSPWH16-A07-4	A07	13812218	3.67-4.08	1.45-1.69	4,5	E3
	qSPWH16-A08-1	A08	1376300	3.76-4.00	1.72-1.93	4,5	E3
	qSPWH16-A08-2	A08	17095922	4.02-6.73	1.24-2.85	4,5	E3
	qSPWH16-A09-1	A09	8749242	3.24-5.31	1.53-3.35	4,5	E3
	qSPWH16-A09-2	A09	18477223	3.41-7.20	1.18-3.73	1,4,5	E3
	qSPWH16-A10-1	A10	86359	4.02-6.75	2.57-3.43	4,5	E3
	qSPWH16-A10-2	A10	7518671	4.28-7.79	0.67-2.89	2,3	E3
	qSPWH16-A10-3	A10	12605952	3.04-7.07	1.14-1.92	2,3,4	E3
	qSPWH16-C01-1	C01	898918	5.47-11.28	2.69-2.79	2,3	E3
	qSPWH16-C01-2	C01	14647548	7.36-8.76	1.60-3.78	2,3	E3
	qSPWH16-C01-3	C01	25968581	4.31-5.06	0.78-1.77	2,3	E3
	qSPWH16-C03-1	C03	8913528	3.87-4.46	0.03-0.12	1,3,5	E3
	qSPWH16-C03-2	C03	16292168	3.18-3.62	1.08-1.79	1,2,5	E3
	qSPWH16-C03-3	C03	30605297	5.00-6.14	0.98-2.41	2,3,5	E3
	qSPWH16-C03-4	C03	34756232	3.38-6.03	0.54-3.24	2.3.5	E3
	qSPWH16-C04-1	C04	3425707	4.92-10.38	2.13-4.05	1,2	E3
	qSPWH16-C04-2	C04	9573802	4.33-7.19	2.15-3.53	2,4,5	E3
	qSPWH16-C04-3	C04	10077114	3.80-9.07	1.38-3.48	2,4,5	E3
	qSPWH16-C04-4	C04	38449907	3.66-7.56	1.15-3.93	2,4,5	E3
	qSPWH16-C05-1	C05	9206887	5.00-7.99	3.13-5.35	1,2,4,5	E3
	qSPWH16-C05-2	C05	21427076	3.89-8.87	1.08-4.84	1,2,3,4,5	E3
	qSPWH16-C05-3	C05	35461490	5.06-5.70	3.33-4.65	4,5	E3
	qSPWH16-C06-1	C06	16371250	3.96-4.69	0.83-2.15	3,4,5	E3
	qSPWH16-C06-2	C06	22713243	6.02-8.30	2.72-3.34	4,5	E3
	qSPWH16-C06-3	C06	23336667	3.10-3.15	0.88-0.96	2,5	E3
	qSPWH16-C06-4	C06	31563851	3.21-5.27	0.98-1.02	2,3	E3
	qSPWH16-C07-1	C07	577684	3.12-7.18	0.69-3.79	2,3	E3
	qSPWH16-C08-1	C08	4973222	6.54-7.99	1.69-4.46	3,4,5	E3
	qSPWH16-C08-2	C08	12162991	6.42-7.57	3.39-3.69	2,5	E3
	qSPWH16-C08-3	C08	21076319	5.29-6.04	3.33-5.37	4,5	E3
	qSPWH16-C08-4	C09	24974690	3.34-3.83	1.35-1.82	2,5	E3
	qSPWH16-C09-1	C09	46744189	3.08-7.24	0.87-3.71	2,4,5	E3
SW	qSWYL13-A01-1	A01	13846377	3.36-5.68	1.95-2.35	4,5	E1
	qSWYL13-A01-2	A01	21885378	6.53-7.02	1.21-1.43	2,3	E1
	qSWYL13-A02-1	A02	7610485	7.18-21.14	1.77-8.32	1,2,3,4,5	E1
	qSWYL13-A02-2	A02	9978238	3.34-3.95	0.91-1.86	3,5	E1
	qSWYL13-A03-1	A03	17281190	4.47-6.23	1.36-1.84	2,4	E1
	qSWYL13-A05-1	A05	6111316	3.85-7.11	0.99-3.08	2,5	E1
	qSWYL13-A05-2	A05	10071113	3.30-8.83	1.61-5.44	4,5	E1
	qSWYL13-A05-3	A05	13595007	3.33-4.85	1.00-1.77	1,3	E1
	qSWYL13-A06-1	A06	13396893	4.97-6.37	2.70-3.22	4,5	E1
	qSWYL13-A06-2	A06	15184268	4.04-9.41	0.82-3.77	1,2,3	E1
	qSWYL13-A09-1	A09	17288298	3.44-7.26	0.80-1.34	2,3	E1
	qSWYL13-A09-2	A09	28130192	4.00-26.19	3.21-7.50	2,3,4,5	E1
	qSWYL13-A09-3	A09	28623596	4.09-4.42	0.52-0.60	2,3	E1
	qSWYL13-A10-1	A10	1416308	4.37-8.85	0.96-3.04	2,5	E1
	qSWYL13-A10-2	A10	15198168	3.42-12.37	1.90-4.66	2,4,5,6	E1
	qSWYL13-C01-1	C01	11143808	4.67-7.30	1.63-1.92	1,3	E1
	qSWYL13-C01-2	C01	22041811	5.86-5.94	1.74-5.20	2,5	E1
	qSWYL13-C03-1	C03	15203367	5.80-7.41	2.77-3.47	2,4,5	E1
	qSWYL13-C03-2	C03	18035059	4.12-5.05	1.80-2.36	4,5	E1
	qSWYL13-C03-3	C03	25856914	4.54-9.67	1.94-4.54	1,2,3,4,5	E1
	qSWYL13-C03-4	C03	30204335	5.44-8.74	2.89-4.96	2,4,5	E1
	qSWYL13-C03-5	C03	32820456	4.23-7.30	0.81-1.04	1,3,5	E1
	qSWYL13-C03-6	C03	33059809	3.87-8.18	0.24-0.65	1,2,3	E1
	qSWYL13-C03-7	C03	38304116	3.05-3.96	1.58-2.51	4,5	E1
	qSWYL13-C04-1	C04	32824347	3.46-4.90	2.00-2.34	1,4,5	E1
	qSWYL13-C05-1	C05	12504134	3.86-9.21	1.30-2.18	3,4	E1
	qSWYL13-C06-1	C06	22495640	3.24-11.72	0.81-7.37	2,3,4,5	E1
	qSWYL13-C06-2	C06	25865116	3.46-4.29	1.14-2.85	4,5	E1
	qSWYL13-C06-3	C06	29292644	4.57-5.23	2.55-3.23	2,4	E1
	qSWYL13-C07-1	C07	8590524	3.19-5.49	1.77-1.79	2,5	E1
	qSWYL13-C07-2	C07	18309538	3.37-6.89	1.66-2.90	3,4	E1
	qSWYL13-C07-3	C07	30256937	4.29-4.44	2.04-3.17	2,5	E1
	qSWYL13-C07-4	C07	38545053	4.35-10.84	1.27-3.68	1,2	E1
	qSWYL13-C07-5	C07	39858834	4.31-5.41	0.85-5.51	5,6	E1
	qSWYL13-C08-1	C08	34945532	5.08-5.68	0.93-1.99	3,5	E1
	qSWYL13-C09-1	C09	6300069	5.59-5.85	1.80-2.41	2,3	E1
	qSWYL13-C09-2	C09	20364097	4.21-4.53	1.31-1.35	1,2	E1
	qSWNC14-A02-1	A02	6232403	4.03-6.18	0.90-1.13	2,3	E2
	qSWNC14-A02-2	A02	23763726	4.636-9.95	1.99-2.41	2,3	E2
	qSWNC14-A03-1	A03	1819506	4.03-9.90	0.84-1.42	2,3	E2
	qSWNC14-A03-2	A03	17068006	5.09-6.62	0.64-1.81	2,3	E2
	qSWNC14-A04-1	A04	4263314	5.13-8.01	1.78-3.31	2,3,6	E2
	qSWNC14-A04-2	A04	13210370	3.64-8.35	0.78-4.11	2,3,4	E2
	qSWNC14-A07-1	A07	9287808	3.24-8.62	0.76-4.96	2,3	E2
	qSWNC14-A08-1	A08	9852929	4.38-6.82	1.05-1.23	2,3	E2
	qSWNC14-A09-1	A09	1968518	3.11-3.86	0.42-0.62	2,3	E2
	qSWNC14-A09-2	A09	3094635	3.72-5.98	1.12-2.33	2,4	E2
	qSWNC14-A09-3	A09	28150419	3.12-13.42	1.11-4.10	1,4	E2
	qSWNC14-A09-4	A09	28182807	5.35-9.51	2.44-3.16	1,2,4	E2
	qSWNC14-A10-1	A10	16421126	3.05-8.40	0.37-4.11	2,3	E2
	qSWNC14-C01-1	C01	16928202	3.59-4.43	1.32-2.30	4,5	E2
	qSWNC14-C03-1	C03	16657840	7.55-9.62	1.96-4.20	2,3,5	E2
	qSWNC14-C03-2	C03	29726240	3.91-5.69	0.55-2.24	3,5	E2
	qSWNC14-C03-3	C03	40437357	3.67-3.97	1.37-1.37	2,4	E2
	qSWNC14-C03-4	C03	54974483	4.23-8.66	1.79-4.14	2,4,5	E2
	qSWNC14-C03-5	C03	59728662	3.35-5.09	1.29-1.83	3,5	E2
	qSWNC14-C04-1	C04	27882624	4.92-8.83	1.36-5.04	2,3,5	E2
	qSWNC14-C05-1	C05	16252830	3.14-9.18	0.33-5.57	3,4	E2
	qSWNC14-C05-2	C05	26254944	4.33-7.64	1.30-4.91	2,3,4	E2
	qSWNC14-C05-3	C05	34615807	4.94-7.29	1.68-5.98	1,4	E2
	qSWNC14-C06-1	C06	3334656	3.08-7.79	1.14-3.66	2,5	E2
	qSWNC14-C06-2	C06	16244038	5.42-6.11	1.04-3.03	3,5	E2
	qSWNC14-C06-3	C06	24758355	4.72-8.29	1.00-3.50	2,3	E2
	qSWNC14-C07-1	C07	37609075	7.80-8.24	1.05-6.19	4,6	E2
	qSWNC14-C08-1	C08	2932247	3.07-3.67	1.10-2.50	2,5	E2
	qSWNC14-C08-2	C08	3303491	5.91-10.60	2.44-3.93	1,2,3,4,5	E2
	qSWNC14-C08-3	C08	18157206	5.02-8.45	1.94-5.61	1,2,4	E2
	qSWNC14-C08-4	C08	22575780	4.68-7.56	0.89-3.05	2,3	E2
	qSWNC14-C08-5	C08	36027660	4.85-6.87	0.83-1.53	2,4	E2
	qSWNC14-C09-1	C09	12324596	5.28-6.93	1.38-3.86	3,4	E2
	qSWNC14-C09-2	C09	29387336	5.77-8.95	1.88-2.43	2,3	E2
	qSWWH16-A01-1	A01	12311662	5.32-7.22	2.72-3.27	2,4,5	E3
	qSWWH16-A01-2	A01	14347375	5.84-7.88	1.60-2.57	1,3	E3
	qSWWH16-A01-3	A01	21531870	4.43-6.74	2.52-4.17	2,4,5	E3
	qSWWH16-A02-1	A02	7610485	3.39-7.74	0.83-3.61	2,3,4,5	E3
	qSWWH16-A02-2	A02	9978238	3.63-10.30	0.89-3.80	1,3	E3
	qSWWH16-A04-1	A04	6184539	3.92-8.10	2.42-2.93	2,4	E3
	qSWWH16-A05-1	A05	11305754	3.30-3.65	0.88-1.62	2,3,5	E3
	qSWWH16-A05-2	A05	15816338	3.22-4.69	0.76-1.45	1,2	E3
	qSWWH16-A06-1	A06	5716484	3.81-12.08	0.96-4.02	1,2,3,5	E3
	qSWWH16-A06-2	A06	10063511	7.40-10.03	2.59-5.21	2,5	E3
	qSWWH16-A06-3	A06	15184188	6.07-14.12	1.68-4.73	1,2,3	E3
	qSWWH16-A07-1	A07	9973232	5.02-10.02	0.46-0.96	1,2,3	E3
	qSWWH16-A09-1	A09	4168712	3.08-10.46	0.99-4.50	1,2,3,4	E3
	qSWWH16-A09-2	A09	27915980	3.85-11.85	2.11-3.22	3,4,5	E3
	qSWWH16-A10-1	A10	15198168	3.63-6.83	1.11-2.31	4,5	E3
	qSWWH16-C02-1	C02	20918373	3.13-3.97	1.34-2.52	4,5	E3
	qSWWH16-C04-1	C04	6713431	3.63-4.96	1.16-2.96	1,4	E3
	qSWWH16-C04-2	C04	9404623	6.78-9.11	2.69-3.45	2,5	E3
	qSWWH16-C04-3	C04	27649747	3.18-5.14	2.22-2.33	4,5	E3
	qSWWH16-C05-1	C05	4072774	3.14-5.94	1.85-3.01	4,5	E3
	qSWWH16-C05-2	C05	5217527	3.92-5.48	1.02-2.16	2,3	E3
	qSWWH16-C05-3	C05	29685392	5.77-7.97	3.00-4.24	2,4	E3
	qSWWH16-C05-4	C05	30666036	3.79-5.89	1.63-3.23	4,5	E3
	qSWWH16-C05-5	C05	38193055	3.61-7.64	1.99-2.09	3,5	E3
	qSWWH16-C06-1	C06	12707029	3.55-6.50	1.41-1.50	3,5	E3
	qSWWH16-C06-2	C06	14727080	3.78-5.62	0.68-0.91	1,2	E3
	qSWWH16-C06-3	C06	21444185	5.00-7.69	1.29-4.15	2,3,4	E3
	qSWWH16-C07-1	C07	25765822	3.68-3.95	0.66-0.84	2,3	E3
	qSWWH16-C07-2	C07	37609075	5.93-8.90	0.41-6.79	1,4,6	E3
	qSWWH16-C07-3	C07	38545053	3.23-6.35	0.87-2.23	1,3,4	E3
	qSWWH16-C07-4	C07	39532351	6.64-10.02	2.81-2.91	1,3	E3
	qSWWH16-C08-1	C08	37165475	5.33-6.35	1.37-2.25	1,2,3	E3
	qSWWH16-C09-1	C09	18147539	3.10-3.28	0.82-1.14	1,5	E3
	qSWWH16-C09-2	C09	20013527	5.57-5.77	3.13-4.40	4,5	E3
	qSWWH16-C09-3	C09	45701602	5.21-5.65	2.73-4.11	4,5	E3
YP	qYPYL13-A01-1	A01	1192622	4.23-4.27	1.48-3.03	1,3	E1
	qYPYL13-A01-2	A01	20175725	3.26-6.43	1.08-2.04	2,3	E1
	qYPYL13-A01-3	A01	20745003	5.25-8.17	1.43-3.43	3,4,5	E1
	qYPYL13-A02-1	A02	13065894	3.48-7.14	0.85-2.43	2,3,4,5	E1
	qYPYL13-A02-2	A02	13115722	3.75-8.74	1.27-3.43	2,3,4,5	E1
	qYPYL13-A02-3	A02	16447302	4.79-7.19	2.03-2.08	3,5	E1
	qYPYL13-A03-1	A03	4052647	4.68-8.60	2.28-3.43	2,4,5	E1
	qYPYL13-A03-2	A03	18711870	4.26-4.97	1.59-1.78	3,5	E1
	qYPYL13-A04-1	A04	7906866	5.84-7.10	1.14-1.18	4,5	E1
	qYPYL13-A05-1	A05	13039104	3.17-8.55	0.97-3.65	2,3	E1
	qYPYL13-A07-1	A07	14982713	3.14-3.92	1.26-1.68	3,5	E1
	qYPYL13-A09-1	A09	17533965	3.40-5.40	1.42-2.44	3,4,5	E1
	qYPYL13-A09-2	A09	19386331	4.09-4.96	0.83-1.92	2,4	E1
	qYPYL13-A10-1	A10	3483688	5.64-12.62	1.78-4.02	2,4,5	E1
	qYPYL13-A10-2	A10	9777221	3.93-6.97	2.08-3.50	1,3,4	E1
	qYPYL13-A10-3	A10	12468394	6.90-11.93	3.55-4.25	2,4	E1
	qYPYL13-C01-1	C01	2143316	3.46-5.10	0.09-0.09	3,4	E1
	qYPYL13-C01-2	C01	32676594	5.15-8.72	3.55-4.99	1,4	E1
	qYPYL13-C01-3	C01	38140842	3.18-3.57	0.49-0.55	2,3	E1
	qYPYL13-C02-1	C02	15516897	3.36-5.29	1.38-2.06	2,3	E1
	qYPYL13-C02-2	C02	23840088	3.73-9.41	1.05-4.56	3,5	E1
	qYPYL13-C02-3	C02	28582763	3.21-6.00	2.53-2.70	4,5	E1
	qYPYL13-C03-1	C03	17128462	3.98-6.26	1.71-3.11	2,3,4,5	E1
	qYPYL13-C03-2	C03	45022247	3.26-4.14	1.06-2.63	2,3,4	E1
	qYPYL13-C03-3	C03	56781515	3.65-4.16	0.84-1.68	2,5	E1
	qYPYL13-C04-1	C04	18928349	4.27-5.81	1.59-3.92	2,4	E1
	qYPYL13-C04-2	C04	48037949	4.57-12.15	2.97-6.78	1,2,4	E1
	qYPYL13-C05-1	C05	16271125	3.01-14.56	5.74-9.64	1,2,4,5	E1
	qYPYL13-C05-2	C05	16379795	3.40-4.19	1.17-2.18	2,4	E1
	qYPYL13-C05-3	C05	19339283	3.57-6.78	2.03-2.76	2,3,4	E1
	qYPYL13-C06-1	C06	1904950	3.58-3.67	1.89-2.10	2,4	E1
	qYPYL13-C07-1	C07	36102759	5.81-5.91	2.22-3.13	2,5	E1
	qYPYL13-C09-1	C09	16972748	3.79-5.37	2.11-4.02	1,2,4,5	E1
	qYPYL13-C09-2	C09	27461881	4.94-5.41	1.51-2.41	3,5	E1
	qYPNC14-A02-1	A02	1329932	6.45-10.97	2.60-4.02	2,3	E2
	qYPNC14-A02-2	A02	13653302	5.48-11.75	1.81-3.81	1,2,3,4	E2
	qYPNC14-A02-3	A02	21348563	5.36-5.50	1.80-4.07	3,4	E2
	qYPNC14-A02-4	A02	21407382	4.13-5.01	1.52-2.66	1,2	E2
	qYPNC14-A02-5	A02	22625060	3.08-11.39	0.65-4.08	1,2,3,4,5	E2
	qYPNC14-A03-1	A03	10504491	4.40-5.06	1.61-2.79	2,4	E2
	qYPNC14-A03-2	A03	22046769	4.36-9.64	1.85-3.79	2,3	E2
	qYPNC14-A03-3	A03	25172525	3.42-4.24	0.69-1.89	2,3,4	E2
	qYPNC14-A04-1	A04	15392247	3.58-8.16	0.75-0.80	1,4	E2
	qYPNC14-A06-1	A06	18302396	5.36-6.99	1.34-1.71	1,2	E2
	qYPNC14-A07-1	A07	16134416	3.94-7.47	1.40-1.63	2,3,4,5	E2
	qYPNC14-A07-2	A07	18999700	3.19-4.81	1.75-2.23	4,5,	E2
	qYPNC14-A07-3	A07	20049290	3.59-6.88	1.03-3.84	2,3,4	E2
	qYPNC14-A07-4	A07	21594406	4.46-8.12	1.29-1.91	1,2,3,4	E2
	qYPNC14-A07-5	A07	23806496	7.52-9.43	3.23-4.67	2,3	E2
	qYPNC14-A09-1	A09	4644798	6.45-8.75	2.41-5.43	2,4	E2
	qYPNC14-A09-2	A09	31332606	4.46-7.22	1.78-2.62	1,3	E2
	qYPNC14-C01-1	C01	4214023	3.35-4.31	1.69-1.77	1,5	E2
	qYPNC14-C01-2	C01	15678141	4.48-6.20	1.82-2.78	1,2,5	E2
	qYPNC14-C01-3	C01	38242022	309-3.34	0.72-1.49	3,4	E2
	qYPNC14-C02-1	C02	21316730	5.49-9.24	2.65-6.21	2,5	E2
	qYPNC14-C02-2	C02	27546286	4.53-5.61	1.62-1.88	1,2	E2
	qYPNC14-C03-1	C03	25198395	5.82-8.10	2.56-4.90	1,2,3,4,5	E2
	qYPNC14-C03-2	C03	33833665	3.62-6.33	1.87-3.55	1,3,4,5	E2
	qYPNC14-C04-1	C04	28852545	3.16-3.82	1.67-2.31	1,5	E2
	qYPNC14-C04-2	C04	34237664	4.20-7.85	1.22-3.48	2,5	E2
	qYPNC14-C04-3	C04	43929535	3.24-3.80	1.58-2.00	4,5	E2
	qYPNC14-C05-1	C05	21181619	4.74-5.82	1.83-2.62	1,3	E2
	qYPNC14-C05-2	C05	32804034	3.43-4.90	0.70-2.42	3,4,5	E2
	qYPNC14-C05-3	C05	36299979	3.43-10.76	2.41-5.92	1,4	E2
	qYPNC14-C06-1	C06	2358232	5.19-12.52	1.91-5.27	2,3,4	E2
	qYPNC14-C06-2	C06	7377869	3.76-7.71	1.56-2.57	2,3,5	E2
	qYPNC14-C06-3	C06	18947267	3.87-6.74	0.89-1.88	2,3,4	E2
	qYPNC14-C06-4	C06	32166389	3.74-4.14	0.79-1.42	2,3	E2
	qYPNC14-C07-1	C07	17279909	4.52-4.95	1.65-1.66	2,3	E2
	qYPNC14-C07-2	C07	30196948	3.02-11.40	0.31-2.26	2,3,4,6	E2
	qYPNC14-C08-1	C08	13189257	3.75-8.56	1.65-3.26	2,4,5	E2
	qYPNC14-C08-2	C08	21716376	3.16-4.80	1.21-1.49	3,5	E2
	qYPNC14-C09-1	C09	2659413	6.52-8.55	3.79-4.23	2,5	E2
	qYPNC14-C09-2	C09	38383507	3.86-4.61	2.77-3.15	1,4	E2
	qYPWH16-A02-1	A02	2638813	4.84-5.00	0.51-1.40	3,5	E3
	qYPWH16-A02-2	A02	17218666	4.76-5.56	0.18-0.70	3,5	E3
	qYPWH16-A02-3	A02	20110811	3.98-4.93	2.16-2.33	2,5	E3
	qYPWH16-A02-4	A02	21525706	5.50-7.92	0.96-3.14	2,3	E3
	qYPWH16-A03-1	A03	20210012	4.26-4.40	1,90-3.11	1,2	E3
	qYPWH16-A04-1	A04	3588760	3.44-13.07	0.38-3.88	2,3,4,5	E3
	qYPWH16-A04-2	A04	13607733	3.07-7.42	0.33-3.21	2,3,4	E3
	qYPWH16-A04-3	A04	15598984	458-4.88	0.80-1.23	2,3	E3
	qYPWH16-A04-4	A04	16730683	3.45-11.39	3.18-6.65	2,4,5	E3
	qYPWH16-A07-1	A07	21399751	5.25-8.52	0.76-4.22	2,3,5	E3
	qYPWH16-A08-1	A08	12452496	5.59-6.84	0.06-0.13	2,3	E3
	qYPWH16-A09-1	A09	9575217	3.89-4.40	0.56-1.23	3,5	E3
	qYPWH16-A09-2	A09	32059301	3.70-5.32	1.83-1.96	4,5	E3
	qYPWH16-A10-1	A10	8882087	3.20-4.74	0.34-4.04	1,2,4,6	E3
	qYPWH16-C01-1	C01	33743214	3.41-5.79	1.07-2.24	3,5	E3
	qYPWH16-C01-2	C01	38414612	3.40-5.09	1.78-1.81	2,5	E3
	qYPWH16-C02-1	C02	7311356	5.98-12.48	1.19-5.98	2,3,4	E3
	qYPWH16-C02-2	C02	15059485	3.40-6.46	1.29-2.08	1,2,3	E3
	qYPWH16-C02-3	C02	41097629	3.06-9.70	0.70-5.73	1,2,3	E3
	qYPWH16-C03-1	C03	44895348	3.45-11.09	1.66-5.47	1,2,3,4	E3
	qYPWH16-C04-1	C04	2345865	4.04-4.44	1.42-2.09	4,5	E3
	qYPWH16-C04-2	C04	3065439	3.86-4.18	0.77-2.76	2,4	E3
	qYPWH16-C04-3	C04	15883157	8.07-12.27	1.40-4.63	2,3	E3
	qYPWH16-C05-1	C05	22484374	12.89-20.47	2.72-9.73	2,3	E3
	qYPWH16-C05-2	C05	33694996	3.37-6.23	1.53-4.04	4,5	E3
	qYPWH16-C06-1	C06	3258139	5.04-8.60	1.90-2.65	3,5	E3
	qYPWH16-C06-2	C06	5848551	3.50-4.64	0.44-0.97	1,3	E3
	qYPWH16-C07-1	C07	23700412	3.32-5.92	0.43-1.94	2,3	E3
	qYPWH16-C07-2	C07	32921463	3.71-5.60	0.88-3.89	2,3,4,5	E3
	qYPWH16-C08-1	C08	5231321	3.42-5.99	1.12-1.79	1,3,5	E3
	qYPWH16-C08-2	C08	11258623	3.64-6.48	1.28-2.57	1,2,3	E3
	qYPWH16-C08-3	C08	15562797	10.88-11.59	6.95-7.44	4,5	E3
	qYPWH16-C09-1	C09	2409958	5.63-7.58	2.01-2.77	2,4	E3
	qYPWH16-C09-2	C09	25107966	3.95-9.25	3.19-6.73	4,5	E3
	qYPWH16-C09-3	C09	28952443	4.52-5.51	0.79-2.82	2,3	E3
	qYPWH16-C09-4	C09	43791723	3.42-6.83	2.75-4.22	4,5	E3
Note, in the method, 1, 2, 3, 4, 5, and 6 represent mrMLM, FASTmrMLM, pLARmEB, pKWmEB, ISIS EM-BLASSO, and FASTmrEMMA.

## Sheet: Table S3
Supplementary Table S3 The shared significantly associated QTNs identified by multi-locus GWAS in different envionments
Trait	QTNa	Chr.	Position	Allele	LOD	R2（%）	–log10(P)	Environment	Methodsb
PH	qPHYL13-C05-2	C05	35061843	C/T	5.11-9.57	2.48-2.76	5.91-10.50	E1	2,3,4
	qPHNC14-C05-2	C05	36252249	T/C	6.96-14.20	4.18-5.15	7.83-15.21	E2	2,3,4
	qPHNC14-C08-2	C08	18928273	C/T	4.69-7.07	1.15-2.97	5.47-7.93	E2	2,3,4
	qPHWH16-C08-2	C08	18801051	G/C	4.14-6.64	1.77-2.50	5.41-7.50	E3	1,2,3
BN	qBNYL13-C06-2	C06	4708955	C/T	6.18-8.91	2.11-4.13	7.02-9.83	E1	2,4,5
	qBNWH16-C06-3	C06	4978698	T/C	5.22-7.61	2.02-3.11	6.02-8.49	E3	1,2,3,4,5
	qBNNC14-C08-2	C08	24114714	C/T	3.37-8.73	2.17-4.08	4.09-9.64	E2	2,4,5
	qBNWH16-C08-2	C08	25243813	C/T	4.31-10.90	1.53-5.04	5.07-11.86	E3	2,3,4
FT	qFTYL13-A02-1	A02	823532	T/G	4.65-8.73	5.43-9.64	1.35-2.53	E1, E3	2,3
	qFTYL13-A02-2	A02	3784916	G/C	4.11-5.69	4.86-6.51	1.34-2.12	E1, E3	2,3
	qFTWH16-A03-4	A03	22616177	A/C	6.56-15.01	7.41-16.03	3.27-6.69	E1,E3	1,2,5
	qFTYL13-A08-1	A08	1997873	A/C	3.23-6.68	3.94-7.54	0.40-1.03	E1, E3	2,5
	qFTYL13-A10-1	A10	13668235	C/T	3.85-15.37	4.60-16.40	1.90-7.70	E2, E3	2,3
	qFTYL13-C01-1	C01	20920370	G/A	3.35-5.64	4.07-6.46	1.12-4.00	E1,E3	2,3,4
	qFTWH16-C03-3	C03	12081167	G/A	3.04-5.72	3.73-5.72	0.35-3.79	E1,E3	1,2,3,4,5,6
	qFTYL13-C04-2	C04	25285025	G/A	3.42-6.73	4.14-7.59	1.09-2.65	E1,E3	2,3
	qFTNC14-C05-3	C05	7459349	C/T	3.61-10.23	4.34-10.23	1.13-5.35	E2, E3	2,3,4,5
	qFTYL13-C05-4	C05	12956572	G/T	4.24-5.38	5.00-6.19	0.93-2.17	E1, E3	1,3
	qFTYL13-C08-3	C08	18905826	C/T	3.05-7.18	3.75-8.05	0.83-3.18	E1,E3	1,2,3,5
	qFTYL13-C09-5	C09	45879981	A/G	3.77-7.28	4.51-8.15	1.99-5.74	E1, E2	1,2,3,4,5
	qFTYL13-C09-6	C09	47042755	C/T	3.01-4.82	1.78-3.90	3.71-5.61	E1, E2, E3	2,4,5
SI	qSIYL13-A01-3	A01	21122950	C/T	3.67–7.27	0.51–1.51	4.40-8.14	E1	2,4,5
	qSIWH16-A01-1	A01	21380473	A/G	3.07–7.82	0.46–3.18	3.77-8.71	E3	3,4,5
	qSIWH16-C02-1	C02	15059835	C/T	4.29–17.47	1.57–6.12	5.06-18.53	E3	2,4,5
	qSINC14-C02-1	C02	16019162	C/T	3.41–8.08	1.92–3.15	4.13-8.98	E2	3,4,5
	qSINC14-C03-5	C03	21828785	T/A	3.50–5.00	1.03–2.84	4.23-5.80	E2	2,3,4
	qSIWH16-C03-2	C03	22767136	C/T	3.07–6.32	0.27–2.16	3.77-7.17	E3	1,2,3,4,5
SN	qSNYL13-2-2	A02	13065894	G/C	4.29–5.52	1.00–1.89	5.06-6.34	E1	2,4,5
	qSNNC14-2-3	A02	13595586	G/A	5.59–8.57	2.44–2.85	6.41-9.48	E2	2,3,5
	qSNWH16-16-3	C06	13960751	C/A	3.85–4.74	1.64–2.59	4.43-5.52	E2	2,4,5
	qSNNC14-16-1	C06	14647381	G/A	4.26–7.57	1.76–3.24	5.02-8.46	E3	2,3,4,5
	qSNWH16-17-2	C07	3019188	G/T	4.02–6.54	0.92–2.52	4.77-7.39	E3	2,3,4
	qSNNC14-17-3	C07	3183504	T/C	4.18–6.15	1.32–2.43	4.94-6.99	E2	1,2,4,5
	qSNWH16-19-1,qSNNC14-19-5	C09	11236617	T/C	6.51–9.86	3.23–3.96	7.36-10.80	E2,E3	1,2,3
	qSNWH16-19-2,qSNNC14-19-6	C09	16839183	C/T	4.55–9.55	128–4.06	5.32-10.47	E2,E3	2,4,5
	qSNWH16-19-3,qSNNC14-19-7	C09	20774003	C/T	3.19–5.58	0.88–2.36	3.89-6.40	E2,E3	2,4,5
SP	qSPWH16-C03-3	C03	30605297	A/G	5.00–6.14	0.98–2.41	5.80-6.97	E3	2,3,5
	qSPNC14-C03-2	C03	31339715	G/T	4.03–8.30	2.14–4.80	4.78-9.20	E2	1,2,3,4,5
	qSPNC14-C09-2	C09	24974617	A/C	3.45–6.37	1.45–3.28	3.72-7.21	E2	2,3,4
	qSPYL13-C09-1	C09	25836173	T/A	3.13–11.90	3.46–5.67	3.84-12.88	E1	2,3,4,5
	qSPWH16-C08-4	C09	24974690	C/T	3.34-3.83	1.35-1.82	4.06-4.57	E3	2,5
SW	qSWYL13-A02-1, qSWWH16-A02-1	A02	7610485	T/A	3.39-21.14	4.10-22.24	0.83-8.32	E1,E3	1,2,3,4,5
	qSWYL13-A02-2, qSWWH16-A02-2	A02	9978238	A/G	3.34-10.95	4.05-11.91	0.89-1.86	E1,E2,E3	1,3,5
	qSWWH16-A04-1	A04	6184539	T/G	4.18-8.10	4.67-9.00	1.95-2.93	E1,E2,E3	1,2,3
	qSWWH16-A05-1	A05	11305754	C/T	3.30-4.6	4.02-5.43	0.88-2.24	E1,E3	1,2,3,5
	qSWWH16-A06-2	A06	10063511	A/T	7.40-10.03	8.27-10.97	2.43-5.21	E2,E3	1,2,5
	qSWWH16-A06-3	A06	15184188	C/T	4.04–14.12	4.79–15.13	0.82–4.73	E1,E3	1,2,3
	qSWWH16-A09-1	A09	4168712	A/G	3.08–0.34	3.79–11.41	0.99–4.50	E2,E3	1,2,3,4
	qSWYL13-A09-2	A09	28130192	C/T	4.00–26.19	4.75–27.33	1.17–7.50	E1,E2	2,3,4,5
	qSWNC14-A09-4	A09	28182807	A/G	5.35–17.43	6.16–18.48	2.44–4.26	E1,E2	1,2,4
	qSWYL13-A10-2, qSWWH16-A10-1	A10	15198168	T/C	3.63–12.37	4.14–13.35	1.11–4.66	E1,E3	2,4,5,6
	qSWYL13-C01-1	C01	11143808	A/C	3.63–7.30	4.36–8.18	1.62–1.92	E1,E2	1,3,5
	qSWYL13-C03-3	C03	25856914	G/T	4.54–9.67	5.32–10.60	1.94–4.54	E1,E3	1,2,3,4,5
	qSWYL13-C03-6	C03	33059809	G/A	3.87–8.18	4.62–9.08	0.24–0.65	E1,E3	1,2,3
	qSWYL13-C03-7	C03	38304116	T/G	3.05–7.82	3.05–7.82	1.58–3.51	E1,E2	2,4,5
	qSWWH16-C05-4	C05	30666036	T/A	3.79–6.92	4.53–7.78	1.63–3.23	E1,E3	2,4,5
	qSWYL13-C07-2	C07	18309538	C/T	3.37–6.54	4.00–7.75	1.04–3.07	E1,E2,E3	2,3,4,5
	qSWNC14-C07-1, qSWWH16-C07-2	C07	37609075	C/A	5.93–8.90	6.77–9.81	0.88–6.79	E2,E3	1,2,4,5
	qSWYL13-C07-4, qSWWH16-C07-3	C07	38545053	A/G	3.23–10.84	3.23–10.84	0.87–3.68	E1,E3	1,2,3,4
	qSWNC14-C08-3	C08	18157206	C/T	4.50–8.45	5.27–9.35	1.94–5.61	E2,E3	1,2,4
	qSWWH16-C08-1	C08	37165475	A/G	5.33–6.35	6.14–7.19	1.37–4.21	E2,E3	1,2,3,4
YP	qYPWH16-A07-1	A07	21399751	A/G	5.25–8.52	0.76–4.22	6.06-9.43	E3	2,3,5
	qYPNC14-A07-4	A07	21594406	G/A	4.46–8.12	1.29–1.91	5.23-9.02	E2	1,2,3,4
	qYPWH16-A10-1	A10	8882087	C/T	3.20–4.74	0.34–4.04	3.91-5.52	E3	1,2,4,6
	qYPYL13-A10-2	A10	9777221	A/C	3.93–6.97	2.08–3.50	4.68-7.84	E1	1,3,4
	qYPWH16-C03-1	C03	44895348	T/C	3.45–11.09	1.66–5.47	4.33-12.05	E3	1,2,3,4
	qYPYL13-C03-2	C03	45022247	T/C	3.26–4.14	1.06–2.63	3.97-4.90	E1	2,3,4
Note, a, the QTNs identified by Multi-locus GWAS and single-locus GWAS within 1 M region were present here.
b, in the method, 1, 2, 3, 4, 5, and 6 represent mrMLM, FASTmrMLM, pLARmEB, pKWmEB, ISIS EM-BLASSO, and FASTmrEMMA.

## Sheet: Table S4
Supplementary Table S4 Significantly associated QTNs identified by multi-locus GWAS and single-locus GWAS
Trait	QTNa	Chromosome	Position	Allele	LOD	R2(%)	–log10(P)	Environment	Methodsb	MLM(GEMMA)c
PH	qPHYL13-A06-1	A06	1823673	A/C	4.19-11.30	0.99-4.04	4.95-12.27	E1	2,3,4,5	1823673
	qPHYL13-A09-1	A09	104022	A/C	5.90-12.43	1.64-2.07	6.73-13.41	E1	1,2,3,5	191392
	qPHNC14-A10-1	A10	12232810	G/A	4.35-12.04	1.65-5.33	5.12-13.02	E2	2,3,4,5	11671073
	qPHWH16-C04-1	C04	6504674	A/G	12.38-24.06	8.31-9.54	13.36-25.18	E2	1,2,4	6504674
	qFTNC14-A01-1	A01	21966108	T/C	3.51-4.93	1.62-4.23	4.24-14.27	E2	1,2,4,5	22523299
	qFTWH16-A03-4	A03	22616177	A/C	6.56-15.01	3.27-4.66	7.41-16.03	E3	1,2,5	22616177
FT	qFTYL13-A09-1	A09	28437625	C/T	3.29-8.00	1.43-2.72	4.00-8.90	E1	2,5,6	28153906
	qFTYL13-C03-2	C03	12024986	A/G	3.07-10.20	2.22-4.77	3.07-10.20	E1	2,3,4,5	12406026
	qFTNC14-C09-4	C09	45879370	G/A	4.36-4.83	2.84-4.57	4.32-5.62	E2	2,4,5	46791877
	qFTYL13-C09-5	C09	45879981	A/G	3.77-7.28	1.99-5.74	4.51-8.15	E1	1,2,3,4,5	45566827
	qBNYL13-A03-2	A03	12103354	C/G	3.17-7.44	1.47-3.69	3.87-8.32	E1	2,3,4	10838197
	qBNYL13-C05-4	C05	17761000	G/C	4.18-9.68	2.06-5.53	4.94-10.61	E1	1,3,5	16688426
BN	qBNWH16-C09-3	C09	14534126	A/G	3.79-5.95	1.42-2.49	4.53-6.79	E3	1,2,3	14068396
	qPSYL13-C05-1	C05	7985979	A/G	4.71-12.46	3.31-6.02	5.49-13.44	E1	2,4	7994681
	qPSWH16-C04-1	C04	2630875	C/T	5.99-19.99	1.83-8.61	6.82-21.07	E3	2,3,4,5	3943362
SI	qSNNC14-C05-4	C05	29349165	A/G	5.38-12.38	2.15-5.70	6.19-13.37	E2	1,2,3,4,5	30469557
	qSNWH16-A04-1	A04	788606	T/C	7.23-14.33	1.62-3.16	8.10-15.34	E3	2,3,4	793456
SN	qSNWH16-C07-2	C07	3019188	G/T	4.02-6.54	0.92-2.52	4.77-7.39	E3	2,3,4	2775149
	qSNWH16-C09-2	C09	16839183	C/T	4.55-9.55	128-4.06	5.32-10.47	E3	2,4,5	16243502
	qSPYL13-A01-3	A01	21432094	G/A	4.22-4.43	1.95-2.01	4.98-10.07	E1	1,2	21199449
	qSPYL13-C03-2	C03	17932082	G/T	5.29-6.12	2.24-5.24	6.10-13.24	E1	1,2,3,5	17087931
SP	qSPWH16-A08-2	A08	17095922	C/T	4.02-6.73	1.24-2.85	4.77-7.59	E3	4,5	16533130
	qSPWH16-C04-2	C04	9573802	A/T	4.33-7.19	2.15-3.53	5.10-8.06	E3	2,4,5	9573830
	qSPNC14-C09-3	C09	40125524	C/A	3.50-9.33	1.20-2.38	4.23-10.26	E2	2,3,4	41400248
SW	qSWYL13-A02-1	A02	7610485	T/A	3.39-21.14	4.10-22.24	0.83-8.32	E1,E3	1,2,3,4,5	7600283
	qSWYL13-A02-2, qSWWH16-A02-2	A02	9978238	A/G	3.34-10.95	4.05-11.91	0.89-1.86	E1,E2,E3	1,3,5	9972386
	qSWYL13-A09-2	A09	28130192	C/T	4.00–26.19	4.75–27.33	1.17–7.50	E1,E2	2,3,4,5	28135940
	qSWNC14-A09-4	A09	28182807	A/G	5.35–17.43	6.16–18.48	2.44–4.26	E1,E2	1,2,4	28171742
	qSWYL13-C01-1	C01	11143808	A/C	3.63–7.30	4.36–8.18	1.62–1.92	E1,E2	1,3,5	11143808
	qSWYL13-C03-3	C03	25856914	G/T	4.54–9.67	5.32–10.60	1.94–4.54	E1,E3	1,2,3,4,5	25846914
	qSWWH16-C05-4	C05	30666036	T/A	3.79–6.92	4.53–7.78	1.63–3.23	E1,E3	2,4,5	30666036
	qSWYL13-C07-2	C07	18309538	C/T	3.37–6.54	4.00–7.75	1.04–3.07	E1,E2,E3	2,3,4,5	18306538
	qSWWH16-C08-1	C08	37165475	A/G	5.33–6.35	6.14–7.19	1.37–4.21	E2,E3	1,2,3,4	37165765
YP	qYPNC14-A02-2	A02	13653302	T/C	5.48-11.75	1.81-3.81	6.29-12.72	E2	1,2,3,4	14005798
	qYPNC14-A04-1	A04	15392247	C/T	3.58-8.16	0.75-0.80	4.31-9.06	E2	1,4	14528593
	qYPNC14-C02-2	C02	27546286	A/T	4.53-5.61	1.62-1.88	5.31-6.42	E2	1,2	27537753
	qYPNC14-C05-1	C05	21181619	A/C	4.74-5.82	1.83-2.62	5.53-6.65	E2	1,3	21177935
	qYPNC14-C06-2	C06	7377869	A/G	3.76-7.71	1.56-2.57	4.50-8.59	E2	2,3,5	7606454
	qYPNC14-C08-2	C08	21716376	A/G	3.16-4.80	1.21-1.49	3.87-5.59	E2	3,5	22555661
	qYPWH16-C01-1	C01	33743214	A/C	3.41-5.79	1.07-2.24	4.13-6.76	E3	3,5	33418214
Note, a, the QTNs identified by Multi-locus GWAS and single-locus GWAS within 1 M region were present here.
b, in the method, 1, 2, 3, 4, 5, and 6 represent mrMLM, FASTmrMLM, pLARmEB, pKWmEB, ISIS EM-BLASSO, and FASTmrEMMA.
c, the results of GEMMA with MLM model from previous study by Hu et al., (2022).

## Sheet: Table S5
Supplementary Table S5 Stable significantly associated QTNs and candidate genes identified by multi-locus GWAS for SW and SP
Trait	QTN	Chromosome	Position	LOD	R2(%)	Method	Candidate genes
SWYL13	qSWYL13-A02-1	A02	7610485	7.18-21.14	1.77-8.32	1,2,3,4,5	BnaA02g13460D	BnaA02g13470D	BnaA02g13480D	BnaA02g13490D	BnaA02g13500D	BnaA02g13510D	BnaA02g13520D	BnaA02g13530D	BnaA02g13540D	BnaA02g13550D	BnaA02g13560D	BnaA02g13570D	BnaA02g13580D	BnaA02g13590D	BnaA02g13600D	BnaA02g13610D	BnaA02g13620D	BnaA02g13630D	BnaA02g13640D	BnaA02g13650D	BnaA02g13660D	BnaA02g13670D	BnaA02g13680D	BnaA02g13690D	BnaA02g13700D	BnaA02g13710D	BnaA02g13720D	BnaA02g13730D	BnaA02g13740D	BnaA02g13750D	BnaA02g13760D	BnaA02g13770D	BnaA02g13780D	BnaA02g13790D	BnaA02g13800D	BnaA02g13810D	BnaA02g13820D	BnaA02g13830D	BnaA02g13840D	BnaA02g13850D	BnaA02g13860D	BnaA02g13870D	BnaA02g13880D
	qSWYL13-A06-2	A06	15184268	4.04-9.41	0.82-3.77	1,2,3	BnaA06g21610D	BnaA06g21620D	BnaA06g21630D	BnaA06g21640D	BnaA06g21650D	BnaA06g21660D	BnaA06g21670D	BnaA06g21680D	BnaA06g21690D	BnaA06g21700D	BnaA06g21710D	BnaA06g21720D	BnaA06g21730D	BnaA06g21740D	BnaA06g21750D	BnaA06g21760D	BnaA06g21770D	BnaA06g21780D	BnaA06g21790D	BnaA06g21800D	BnaA06g21810D	BnaA06g21820D	BnaA06g21830D	BnaA06g21840D	BnaA06g21850D	BnaA06g21860D	BnaA06g21870D	BnaA06g21880D	BnaA06g21890D	BnaA06g21900D	BnaA06g21910D	BnaA06g21920D	BnaA06g21930D	BnaA06g21940D	BnaA06g21950D	BnaA06g21960D	BnaA06g21970D
	qSWYL13-A09-2	A09	28130192	4.00-26.19	3.21-7.50	2,3,4,5	BnaA09g38990D	BnaA09g39000D	BnaA09g39010D	BnaA09g39020D	BnaA09g39030D	BnaA09g39040D	BnaA09g39050D	BnaA09g39060D	BnaA09g39070D	BnaA09g39080D	BnaA09g39090D	BnaA09g39100D	BnaA09g39110D	BnaA09g39120D	BnaA09g39130D	BnaA09g39140D	BnaA09g39150D	BnaA09g39160D	BnaA09g39170D	BnaA09g39180D	BnaA09g39190D	BnaA09g39200D	BnaA09g39210D	BnaA09g39220D	BnaA09g39230D	BnaA09g39240D	BnaA09g39250D	BnaA09g39260D	BnaA09g39270D	BnaA09g39280D	BnaA09g39290D	BnaA09g39300D	BnaA09g39310D	BnaA09g39320D	BnaA09g39330D	BnaA09g39340D	BnaA09g39350D	BnaA09g39360D	BnaA09g39370D	BnaA09g39380D	BnaA09g39390D	BnaA09g39400D	BnaA09g39410D
	qSWYL13-C01-1	C01	11143808	4.67-7.30	1.63-1.92	1,3	BnaC01g15890D	BnaC01g15900D	BnaC01g15910D	BnaC01g15920D	BnaC01g15930D	BnaC01g15940D	BnaC01g15950D	BnaC01g15960D	BnaC01g15970D	BnaC01g15980D	BnaC01g15990D	BnaC01g16000D	BnaC01g16010D	BnaC01g16020D	BnaC01g16030D	BnaC01g16040D	BnaC01g16050D	BnaC01g16060D	BnaC01g16070D	BnaC01g16080D	BnaC01g16090D	BnaC01g16100D	BnaC01g16110D	BnaC01g16120D	BnaC01g16130D	BnaC01g16140D	BnaC01g16150D	BnaC01g16160D	BnaC01g16170D	BnaC01g16180D	BnaC01g16190D	BnaC01g16200D	BnaC01g16210D	BnaC01g16220D	BnaC01g16230D	BnaC01g16240D	BnaC01g16250D	BnaC01g16260D	BnaC01g16270D	BnaC01g16280D	BnaC01g16290D	BnaC01g16300D	BnaC01g16310D
	qSWYL13-C03-3	C03	25856914	4.54-9.67	1.94-4.54	1,2,3,4,5	BnaC03g40750D	BnaC03g40760D	BnaC03g40770D	BnaC03g40780D	BnaC03g40790D	BnaC03g40800D	BnaC03g40810D	BnaC03g40820D	BnaC03g40830D	BnaC03g40840D	BnaC03g40850D	BnaC03g40860D	BnaC03g40870D	BnaC03g40880D	BnaC03g40890D	BnaC03g40900D	BnaC03g40910D	BnaC03g40920D	BnaC03g40930D	BnaC03g40940D	BnaC03g40950D	BnaC03g40960D	BnaC03g40970D	BnaC03g40980D	BnaC03g40990D	BnaC03g41000D	BnaC03g41010D	BnaC03g41020D	BnaC03g41030D	BnaC03g41040D	BnaC03g41050D	BnaC03g41060D	BnaC03g41070D	BnaC03g41080D	BnaC03g41090D	BnaC03g41100D	BnaC03g41110D	BnaC03g41120D	BnaC03g41130D	BnaC03g41140D	BnaC03g41150D	BnaC03g41160D
	qSWYL13-C03-6	C03	33059809	3.87-8.18	0.24-0.65	1,2,3	BnaC03g47840D	BnaC03g47850D	BnaC03g47860D	BnaC03g47870D	BnaC03g47880D	BnaC03g47890D	BnaC03g47900D	BnaC03g47910D	BnaC03g47920D	BnaC03g47930D	BnaC03g47940D	BnaC03g47950D	BnaC03g47960D	BnaC03g47970D	BnaC03g47980D	BnaC03g47990D	BnaC03g48000D	BnaC03g48010D	BnaC03g48020D	BnaC03g48030D	BnaC03g48040D	BnaC03g48050D	BnaC03g48060D	BnaC03g48070D	BnaC03g48080D	BnaC03g48090D	BnaC03g48100D	BnaC03g48110D	BnaC03g48120D	BnaC03g48130D	BnaC03g48140D	BnaC03g48150D	BnaC03g48160D	BnaC03g48170D	BnaC03g48180D	BnaC03g48190D	BnaC03g48200D	BnaC03g48210D	BnaC03g48220D	BnaC03g48230D	BnaC03g48240D	BnaC03g48250D	BnaC03g48260D
	qSWYL13-C03-7	C03	38304116	3.05-3.96	1.58-2.51	4,5	BnaC03g53030D	BnaC03g53040D	BnaC03g53050D	BnaC03g53060D	BnaC03g53070D	BnaC03g53080D	BnaC03g53090D	BnaC03g53100D	BnaC03g53110D	BnaC03g53120D	BnaC03g53130D	BnaC03g53140D	BnaC03g53150D	BnaC03g53160D	BnaC03g53170D	BnaC03g53180D	BnaC03g53190D	BnaC03g53200D	BnaC03g53210D	BnaC03g53220D	BnaC03g53230D	BnaC03g53240D	BnaC03g53250D
	qSWYL13-C07-2	C07	18309538	3.37-6.89	1.66-2.90	3,4	BnaC07g12540D	BnaC07g12550D	BnaC07g12560D	BnaC07g12570D	BnaC07g12580D	BnaC07g12590D	BnaC07g12600D	BnaC07g12610D	BnaC07g12620D	BnaC07g12630D	BnaC07g12640D	BnaC07g12650D	BnaC07g12660D	BnaC07g12670D	BnaC07g12680D	BnaC07g12690D	BnaC07g12700D	BnaC07g12710D	BnaC07g12720D	BnaC07g12730D	BnaC07g12740D	BnaC07g12750D	BnaC07g12760D	BnaC07g12770D	BnaC07g12780D	BnaC07g12790D	BnaC07g12800D	BnaC07g12810D	BnaC07g12820D	BnaC07g12830D	BnaC07g12840D	BnaC07g12850D	BnaC07g12860D	BnaC07g12870D	BnaC07g12880D	BnaC07g12890D	BnaC07g12900D	BnaC07g12910D	BnaC07g12920D	BnaC07g12930D	BnaC07g12940D	BnaC07g12950D	BnaC07g12960D
SWNC14	qSWNC14-A09-4	A09	28182807	5.35-9.51	2.44-3.16	1,2,4	BnaA09g39470D	BnaA09g39480D	BnaA09g39490D	BnaA09g39500D	BnaA09g39510D	BnaA09g39520D	BnaA09g39530D	BnaA09g39540D	BnaA09g39550D	BnaA09g39560D	BnaA09g39570D	BnaA09g39580D	BnaA09g39590D	BnaA09g39600D	BnaA09g39610D	BnaA09g39620D	BnaA09g39630D	BnaA09g39640D	BnaA09g39650D	BnaA09g39660D	BnaA09g39670D	BnaA09g39680D	BnaA09g39690D	BnaA09g39700D	BnaA09g39710D	BnaA09g39720D	BnaA09g39730D	BnaA09g39740D	BnaA09g39750D	BnaA09g39760D	BnaA09g39770D	BnaA09g39780D	BnaA09g39790D	BnaA09g39800D	BnaA09g39810D	BnaA09g39820D	BnaA09g39830D	BnaA09g39840D	BnaA09g39850D	BnaA09g39860D	BnaA09g39870D	BnaA09g39880D	BnaA09g39890D
	qSWNC14-C08-3	C08	18157206	5.02-8.45	1.94-5.61	1,2,4	BnaC08g12870D	BnaC08g12880D	BnaC08g12890D	BnaC08g12900D	BnaC08g12910D	BnaC08g12920D	BnaC08g12930D	BnaC08g12940D	BnaC08g12950D	BnaC08g12960D	BnaC08g12970D	BnaC08g12980D	BnaC08g12990D	BnaC08g13000D	BnaC08g13010D	BnaC08g13020D	BnaC08g13030D	BnaC08g13040D	BnaC08g13050D	BnaC08g13060D	BnaC08g13070D	BnaC08g13080D	BnaC08g13090D	BnaC08g13100D	BnaC08g13110D	BnaC08g13120D	BnaC08g13130D	BnaC08g13140D	BnaC08g13150D	BnaC08g13160D	BnaC08g13170D	BnaC08g13180D	BnaC08g13190D	BnaC08g13200D	BnaC08g13210D	BnaC08g13220D	BnaC08g13230D	BnaC08g13240D	BnaC08g13250D	BnaC08g13260D	BnaC08g13270D	BnaC08g13280D	BnaC08g13290D
SWWH16	qSWWH16-A04-1	A04	6184539	3.92-8.10	2.42-2.93	2,4	BnaA04g07240D	BnaA04g07250D	BnaA04g07260D	BnaA04g07270D	BnaA04g07280D	BnaA04g07290D	BnaA04g07300D	BnaA04g07310D	BnaA04g07320D	BnaA04g07330D	BnaA04g07340D	BnaA04g07350D	BnaA04g07360D	BnaA04g07370D	BnaA04g07380D	BnaA04g07390D	BnaA04g07400D	BnaA04g07410D	BnaA04g07420D	BnaA04g07430D	BnaA04g07440D	BnaA04g07450D	BnaA04g07460D	BnaA04g07470D	BnaA04g07480D
	qSWWH16-A05-1	A05	11305754	3.30-3.65	0.88-1.62	2,3,5	BnaA05g16420D	BnaA05g16430D	BnaA05g16440D	BnaA05g16450D	BnaA05g16460D	BnaA05g16470D	BnaA05g16480D	BnaA05g16490D	BnaA05g16500D	BnaA05g16510D	BnaA05g16520D	BnaA05g16530D	BnaA05g16540D	BnaA05g16550D	BnaA05g16560D	BnaA05g16570D	BnaA05g16580D	BnaA05g16590D	BnaA05g16600D	BnaA05g16610D	BnaA05g16620D	BnaA05g16630D	BnaA05g16640D	BnaA05g16650D	BnaA05g16660D	BnaA05g16670D	BnaA05g16680D	BnaA05g16690D	BnaA05g16700D	BnaA05g16710D	BnaA05g16720D	BnaA05g16730D	BnaA05g16740D	BnaA05g16750D	BnaA05g16760D	BnaA05g16770D	BnaA05g16780D	BnaA05g16790D	BnaA05g16800D	BnaA05g16810D
	qSWWH16-A06-2	A06	10063511	7.40-10.03	2.59-5.21	2,5	BnaA06g17330D	BnaA06g17340D	BnaA06g17350D	BnaA06g17360D	BnaA06g17370D	BnaA06g17380D	BnaA06g17390D	BnaA06g17400D	BnaA06g17410D	BnaA06g17420D	BnaA06g17430D	BnaA06g17440D	BnaA06g17450D	BnaA06g17460D	BnaA06g17470D	BnaA06g17480D	BnaA06g17490D	BnaA06g17500D	BnaA06g17510D	BnaA06g17520D	BnaA06g17530D	BnaA06g17540D	BnaA06g17550D	BnaA06g17560D	BnaA06g17570D	BnaA06g17580D	BnaA06g17590D	BnaA06g17600D	BnaA06g17610D	BnaA06g17620D	BnaA06g17630D	BnaA06g17640D	BnaA06g17650D	BnaA06g17660D	BnaA06g17670D	BnaA06g17680D	BnaA06g17690D	BnaA06g17700D	BnaA06g17710D	BnaA06g17720D	BnaA06g17730D	BnaA06g17740D	BnaA06g17750D
	qSWWH16-A06-3	A06	15184188	6.07-14.12	1.68-4.73	1,2,3	BnaA06g21610D	BnaA06g21620D	BnaA06g21630D	BnaA06g21640D	BnaA06g21650D	BnaA06g21660D	BnaA06g21670D	BnaA06g21680D	BnaA06g21690D	BnaA06g21700D	BnaA06g21710D	BnaA06g21720D	BnaA06g21730D	BnaA06g21740D	BnaA06g21750D	BnaA06g21760D	BnaA06g21770D	BnaA06g21780D	BnaA06g21790D	BnaA06g21800D	BnaA06g21810D	BnaA06g21820D	BnaA06g21830D	BnaA06g21840D	BnaA06g21850D	BnaA06g21860D	BnaA06g21870D	BnaA06g21880D	BnaA06g21890D	BnaA06g21900D	BnaA06g21910D	BnaA06g21920D	BnaA06g21930D	BnaA06g21940D	BnaA06g21950D	BnaA06g21960D	BnaA06g21970D
	qSWWH16-A09-1	A09	4168712	3.08-10.46	0.99-4.50	1,2,3,4	BnaA09g08190D	BnaA09g08200D	BnaA09g08210D	BnaA09g08220D	BnaA09g08230D	BnaA09g08240D	BnaA09g08250D	BnaA09g08260D	BnaA09g08270D	BnaA09g08280D	BnaA09g08290D	BnaA09g08300D	BnaA09g08310D	BnaA09g08320D	BnaA09g08330D	BnaA09g08340D	BnaA09g08350D	BnaA09g08360D	BnaA09g08370D	BnaA09g08380D	BnaA09g08390D	BnaA09g08400D	BnaA09g08410D	BnaA09g08420D	BnaA09g08430D	BnaA09g08440D	BnaA09g08450D	BnaA09g08460D	BnaA09g08470D	BnaA09g08480D	BnaA09g08490D	BnaA09g08500D	BnaA09g08510D	BnaA09g08520D	BnaA09g08530D	BnaA09g08540D	BnaA09g08550D	BnaA09g08560D	BnaA09g08570D	BnaA09g08580D	BnaA09g08590D	BnaA09g08600D	BnaA09g08610D
	qSWWH16-A09-2	A09	27915980	3.85-11.85	2.11-3.22	3,4,5	BnaA09g38990D	BnaA09g39000D	BnaA09g39010D	BnaA09g39020D	BnaA09g39030D	BnaA09g39040D	BnaA09g39050D	BnaA09g39060D	BnaA09g39070D	BnaA09g39080D	BnaA09g39090D	BnaA09g39100D	BnaA09g39110D	BnaA09g39120D	BnaA09g39130D	BnaA09g39140D	BnaA09g39150D	BnaA09g39160D	BnaA09g39170D	BnaA09g39180D	BnaA09g39190D	BnaA09g39200D	BnaA09g39210D	BnaA09g39220D	BnaA09g39230D	BnaA09g39240D	BnaA09g39250D	BnaA09g39260D	BnaA09g39270D	BnaA09g39280D	BnaA09g39290D	BnaA09g39300D	BnaA09g39310D	BnaA09g39320D	BnaA09g39330D	BnaA09g39340D	BnaA09g39350D	BnaA09g39360D	BnaA09g39370D	BnaA09g39380D	BnaA09g39390D	BnaA09g39400D	BnaA09g39410D
	qSWWH16-C05-4	C05	30666036	3.79-5.89	1.63-3.23	4,5	BnaC05g31170D	BnaC05g31180D	BnaC05g31190D	BnaC05g31200D	BnaC05g31210D	BnaC05g31220D	BnaC05g31230D	BnaC05g31240D	BnaC05g31250D	BnaC05g31260D	BnaC05g31270D	BnaC05g31280D	BnaC05g31290D	BnaC05g31300D	BnaC05g31310D	BnaC05g31320D	BnaC05g31330D	BnaC05g31340D	BnaC05g31350D	BnaC05g31360D	BnaC05g31370D	BnaC05g31380D	BnaC05g31390D	BnaC05g31400D	BnaC05g31410D	BnaC05g31420D	BnaC05g31430D	BnaC05g31440D	BnaC05g31450D	BnaC05g31460D	BnaC05g31470D
	qSWWH16-C08-1	C08	37165475	5.33-6.35	1.37-2.25	1,2,3	BnaC08g43060D	BnaC08g43070D	BnaC08g43080D	BnaC08g43090D	BnaC08g43100D	BnaC08g43110D	BnaC08g43120D	BnaC08g43130D	BnaC08g43140D	BnaC08g43150D	BnaC08g43160D	BnaC08g43170D	BnaC08g43180D	BnaC08g43190D	BnaC08g43200D	BnaC08g43210D	BnaC08g43220D	BnaC08g43230D	BnaC08g43240D	BnaC08g43250D	BnaC08g43260D	BnaC08g43270D	BnaC08g43280D	BnaC08g43290D	BnaC08g43300D	BnaC08g43310D	BnaC08g43320D	BnaC08g43330D	BnaC08g43340D	BnaC08g43350D	BnaC08g43360D	BnaC08g43370D	BnaC08g43380D	BnaC08g43390D	BnaC08g43400D	BnaC08g43410D	BnaC08g43420D	BnaC08g43430D	BnaC08g43440D	BnaC08g43450D	BnaC08g43460D	BnaC08g43470D	BnaC08g43480D
	qSWYL13-A02-1, qSWWH16-A02-1	A02	7610485	3.39-21.14	0.83-8.32	1,2,3,4,5	BnaA02g13460D	BnaA02g13470D	BnaA02g13480D	BnaA02g13490D	BnaA02g13500D	BnaA02g13510D	BnaA02g13520D	BnaA02g13530D	BnaA02g13540D	BnaA02g13550D	BnaA02g13560D	BnaA02g13570D	BnaA02g13580D	BnaA02g13590D	BnaA02g13600D	BnaA02g13610D	BnaA02g13620D	BnaA02g13630D	BnaA02g13640D	BnaA02g13650D	BnaA02g13660D	BnaA02g13670D	BnaA02g13680D	BnaA02g13690D	BnaA02g13700D	BnaA02g13710D	BnaA02g13720D	BnaA02g13730D	BnaA02g13740D	BnaA02g13750D	BnaA02g13760D	BnaA02g13770D	BnaA02g13780D	BnaA02g13790D	BnaA02g13800D	BnaA02g13810D	BnaA02g13820D	BnaA02g13830D	BnaA02g13840D	BnaA02g13850D	BnaA02g13860D	BnaA02g13870D	BnaA02g13880D
	qSWYL13-A02-2, qSWWH16-A02-2	A02	9978238	3.34-10.30	0.89-3.80	1,3,5	BnaA02g16450D	BnaA02g16460D	BnaA02g16470D	BnaA02g16480D	BnaA02g16490D	BnaA02g16500D	BnaA02g16510D	BnaA02g16520D	BnaA02g16530D	BnaA02g16540D	BnaA02g16550D	BnaA02g16560D	BnaA02g16570D	BnaA02g16580D	BnaA02g16590D	BnaA02g16600D	BnaA02g16610D	BnaA02g16620D	BnaA02g16630D	BnaA02g16640D	BnaA02g16650D	BnaA02g16660D	BnaA02g16670D	BnaA02g16680D	BnaA02g16690D	BnaA02g16700D	BnaA02g16710D	BnaA02g16720D	BnaA02g16730D	BnaA02g16740D	BnaA02g16750D	BnaA02g16760D	BnaA02g16770D	BnaA02g16780D	BnaA02g16790D	BnaA02g16800D	BnaA02g16810D	BnaA02g16820D	BnaA02g16830D	BnaA02g16840D	BnaA02g16850D	BnaA02g16860D	BnaA02g16870D
	qSWYL13-A10-2, qSWWH16-A10-1	A10	15198168	3.42-12.37	1.11-4.66	2,4,5,6	BnaA10g22080D	BnaA10g22090D	BnaA10g22100D	BnaA10g22110D	BnaA10g22120D	BnaA10g22130D	BnaA10g22140D	BnaA10g22150D	BnaA10g22160D	BnaA10g22170D	BnaA10g22180D	BnaA10g22190D	BnaA10g22200D	BnaA10g22210D	BnaA10g22220D	BnaA10g22230D	BnaA10g22240D	BnaA10g22250D	BnaA10g22260D	BnaA10g22270D	BnaA10g22280D	BnaA10g22290D	BnaA10g22300D	BnaA10g22310D	BnaA10g22320D	BnaA10g22330D	BnaA10g22340D	BnaA10g22350D	BnaA10g22360D	BnaA10g22370D	BnaA10g22380D	BnaA10g22390D	BnaA10g22400D	BnaA10g22410D	BnaA10g22420D	BnaA10g22430D	BnaA10g22440D	BnaA10g22450D	BnaA10g22460D	BnaA10g22470D	BnaA10g22480D	BnaA10g22490D	BnaA10g22500D
	qSWYL13-C07-4, qSWWH16-C07-3	C07	38545053	3.23-10.84	0.87-3.68	1,2,3,4	BnaC07g36120D	BnaC07g36130D	BnaC07g36140D	BnaC07g36150D	BnaC07g36160D	BnaC07g36170D	BnaC07g36180D	BnaC07g36190D	BnaC07g36200D	BnaC07g36210D	BnaC07g36220D	BnaC07g36230D	BnaC07g36240D	BnaC07g36250D	BnaC07g36260D	BnaC07g36270D	BnaC07g36280D	BnaC07g36290D	BnaC07g36300D	BnaC07g36310D	BnaC07g36320D	BnaC07g36330D	BnaC07g36340D	BnaC07g36350D	BnaC07g36360D	BnaC07g36370D	BnaC07g36380D	BnaC07g36390D	BnaC07g36400D	BnaC07g36410D	BnaC07g36420D	BnaC07g36430D	BnaC07g36440D	BnaC07g36450D	BnaC07g36460D	BnaC07g36470D	BnaC07g36480D	BnaC07g36490D	BnaC07g36500D	BnaC07g36510D	BnaC07g36520D	BnaC07g36530D	BnaC07g36540D
	qSWNC14-C07-1, qSWWH16-C07-2	C07	37609075	5.93-8.90	0.41-6.79	1,4,6	BnaC07g34840D	BnaC07g34850D	BnaC07g34860D	BnaC07g34870D	BnaC07g34880D	BnaC07g34890D	BnaC07g34900D	BnaC07g34910D	BnaC07g34920D	BnaC07g34930D	BnaC07g34940D	BnaC07g34950D	BnaC07g34960D	BnaC07g34970D	BnaC07g34980D	BnaC07g34990D	BnaC07g35000D	BnaC07g35010D	BnaC07g35020D	BnaC07g35030D	BnaC07g35040D	BnaC07g35050D	BnaC07g35060D	BnaC07g35070D	BnaC07g35080D	BnaC07g35090D	BnaC07g35100D	BnaC07g35110D	BnaC07g35120D	BnaC07g35130D	BnaC07g35140D	BnaC07g35150D	BnaC07g35160D	BnaC07g35170D	BnaC07g35180D	BnaC07g35190D	BnaC07g35200D	BnaC07g35210D	BnaC07g35220D	BnaC07g35230D	BnaC07g35240D	BnaC07g35250D	BnaC07g35260D
SPY13	qSPYL13-A02-1	A02	566056	6.52-11.38	2.96-6.74	2,3,4,5	BnaA02g00950D	BnaA02g00960D	BnaA02g00970D	BnaA02g00980D	BnaA02g00990D	BnaA02g01000D	BnaA02g01010D	BnaA02g01020D	BnaA02g01030D	BnaA02g01040D	BnaA02g01050D	BnaA02g01060D	BnaA02g01070D	BnaA02g01080D	BnaA02g01090D	BnaA02g01100D	BnaA02g01110D	BnaA02g01120D	BnaA02g01130D	BnaA02g01140D	BnaA02g01150D	BnaA02g01160D	BnaA02g01170D	BnaA02g01180D	BnaA02g01190D	BnaA02g01200D	BnaA02g01210D	BnaA02g01220D	BnaA02g01230D	BnaA02g01240D	BnaA02g01250D	BnaA02g01260D	BnaA02g01270D	BnaA02g01280D	BnaA02g01290D	BnaA02g01300D	BnaA02g01310D	BnaA02g01320D	BnaA02g01330D	BnaA02g01340D	BnaA02g01350D	BnaA02g01360D	BnaA02g01370D
	qSPYL13-C03-2	C03	17932082	5.29-6.12	2.24-5.24	1,2,3,5	BnaC03g29590D	BnaC03g29600D	BnaC03g29610D	BnaC03g29620D	BnaC03g29630D	BnaC03g29640D	BnaC03g29650D	BnaC03g29660D	BnaC03g29670D	BnaC03g29680D	BnaC03g29690D	BnaC03g29700D	BnaC03g29710D	BnaC03g29720D	BnaC03g29730D	BnaC03g29740D	BnaC03g29750D	BnaC03g29760D	BnaC03g29770D	BnaC03g29780D	BnaC03g29790D	BnaC03g29800D	BnaC03g29810D	BnaC03g29820D	BnaC03g29830D	BnaC03g29840D	BnaC03g29850D	BnaC03g29860D	BnaC03g29870D	BnaC03g29880D	BnaC03g29890D	BnaC03g29900D	BnaC03g29910D	BnaC03g29920D	BnaC03g29930D	BnaC03g29940D	BnaC03g29950D	BnaC03g29960D	BnaC03g29970D	BnaC03g29980D	BnaC03g29990D
	qSPYL13-C09-1	C09	25836173	3.13-11.90	3.46-5.67	2,3,4,5	BnaC09g25850D	BnaC09g25860D	BnaC09g25870D	BnaC09g25880D	BnaC09g25890D	BnaC09g25900D	BnaC09g25910D	BnaC09g25920D	BnaC09g25930D	BnaC09g25940D	BnaC09g25950D	BnaC09g25960D	BnaC09g25970D	BnaC09g25980D	BnaC09g25990D	BnaC09g26000D	BnaC09g26010D	BnaC09g26020D	BnaC09g26030D	BnaC09g26040D	BnaC09g26050D	BnaC09g26060D	BnaC09g26070D	BnaC09g26080D	BnaC09g26090D	BnaC09g26100D	BnaC09g26110D	BnaC09g26120D	BnaC09g26130D	BnaC09g26140D	BnaC09g26150D	BnaC09g26160D
SPNC14	qSPNC14-A02-1	A02	14549145	3.05-8.44	0.00-1.27	1,2,3	BnaA02g21960D	BnaA02g21970D	BnaA02g21980D	BnaA02g21990D	BnaA02g22000D	BnaA02g22010D	BnaA02g22020D	BnaA02g22030D	BnaA02g22040D	BnaA02g22050D	BnaA02g22060D	BnaA02g22070D	BnaA02g22080D	BnaA02g22090D	BnaA02g22100D	BnaA02g22110D	BnaA02g22120D	BnaA02g22130D	BnaA02g22140D	BnaA02g22150D	BnaA02g22160D	BnaA02g22170D	BnaA02g22180D	BnaA02g22190D	BnaA02g22200D	BnaA02g22210D	BnaA02g22220D	BnaA02g22230D	BnaA02g22240D	BnaA02g22250D
	qSPNC14-C09-2	C09	24974617	3.45-6.37	1.45-3.28	2,3,4	BnaC09g25380D	BnaC09g25390D	BnaC09g25400D	BnaC09g25410D	BnaC09g25420D	BnaC09g25430D	BnaC09g25440D	BnaC09g25450D	BnaC09g25460D	BnaC09g25470D	BnaC09g25480D	BnaC09g25490D	BnaC09g25500D	BnaC09g25510D	BnaC09g25520D	BnaC09g25530D	BnaC09g25540D	BnaC09g25550D	BnaC09g25560D	BnaC09g25570D	BnaC09g25580D	BnaC09g25590D	BnaC09g25600D	BnaC09g25610D
	qSPNC14-C09-3	C09	40125524	3.50-9.33	1.20-2.38	2,3,4	BnaC09g36560D	BnaC09g36570D	BnaC09g36580D	BnaC09g36590D	BnaC09g36600D	BnaC09g36610D	BnaC09g36620D	BnaC09g36630D	BnaC09g36640D	BnaC09g36650D	BnaC09g36660D	BnaC09g36670D	BnaC09g36680D	BnaC09g36690D	BnaC09g36700D	BnaC09g36710D	BnaC09g36720D	BnaC09g36730D	BnaC09g36740D	BnaC09g36750D	BnaC09g36760D	BnaC09g36770D	BnaC09g36780D	BnaC09g36790D	BnaC09g36800D	BnaC09g36810D	BnaC09g36820D	BnaC09g36830D	BnaC09g36840D	BnaC09g36850D	BnaC09g36860D	BnaC09g36870D	BnaC09g36880D	BnaC09g36890D	BnaC09g36900D	BnaC09g36910D	BnaC09g36920D	BnaC09g36930D	BnaC09g36940D	BnaC09g36950D	BnaC09g36960D
	qSPNC14-C09-4	C09	44919935	5.66-8.17	2.39-3.70	2,4,5	BnaC09g43400D	BnaC09g43410D	BnaC09g43420D	BnaC09g43430D	BnaC09g43440D	BnaC09g43450D	BnaC09g43460D	BnaC09g43470D	BnaC09g43480D	BnaC09g43490D	BnaC09g43500D	BnaC09g43510D	BnaC09g43520D	BnaC09g43530D	BnaC09g43540D	BnaC09g43550D	BnaC09g43560D	BnaC09g43570D	BnaC09g43580D	BnaC09g43590D	BnaC09g43600D	BnaC09g43610D	BnaC09g43620D	BnaC09g43630D	BnaC09g43640D	BnaC09g43650D	BnaC09g43660D	BnaC09g43670D	BnaC09g43680D	BnaC09g43690D	BnaC09g43700D	BnaC09g43710D	BnaC09g43720D	BnaC09g43730D	BnaC09g43740D	BnaC09g43750D	BnaC09g43760D	BnaC09g43770D	BnaC09g43780D	BnaC09g43790D	BnaC09g43800D	BnaC09g43810D	BnaC09g43820D
SPWH16	qSPWH16-A02-1	A02	2493428	4.70-6.47	1.41-2.25	1,2,5	BnaA02g05110D	BnaA02g05120D	BnaA02g05130D	BnaA02g05140D	BnaA02g05150D	BnaA02g05160D	BnaA02g05170D	BnaA02g05180D	BnaA02g05190D	BnaA02g05200D	BnaA02g05210D	BnaA02g05220D	BnaA02g05230D	BnaA02g05240D	BnaA02g05250D	BnaA02g05260D	BnaA02g05270D	BnaA02g05280D	BnaA02g05290D	BnaA02g05300D	BnaA02g05310D	BnaA02g05320D	BnaA02g05330D	BnaA02g05340D	BnaA02g05350D	BnaA02g05360D	BnaA02g05370D	BnaA02g05380D	BnaA02g05390D	BnaA02g05400D	BnaA02g05410D	BnaA02g05420D	BnaA02g05430D	BnaA02g05440D	BnaA02g05450D	BnaA02g05460D	BnaA02g05470D	BnaA02g05480D	BnaA02g05490D	BnaA02g05500D	BnaA02g05510D	BnaA02g05520D	BnaA02g05530D
	qSPWH16-A04-2	A04	11913667	5.09-6.62	2.78-4.50	2,4,5	BnaA04g13860D	BnaA04g13870D	BnaA04g13880D	BnaA04g13890D	BnaA04g13900D	BnaA04g13910D	BnaA04g13920D	BnaA04g13930D	BnaA04g13940D	BnaA04g13950D	BnaA04g13960D	BnaA04g13970D	BnaA04g13980D	BnaA04g13990D	BnaA04g14000D	BnaA04g14010D	BnaA04g14020D	BnaA04g14030D	BnaA04g14040D	BnaA04g14050D	BnaA04g14060D	BnaA04g14070D	BnaA04g14080D	BnaA04g14090D	BnaA04g14100D	BnaA04g14110D	BnaA04g14120D	BnaA04g14130D	BnaA04g14140D	BnaA04g14150D	BnaA04g14160D	BnaA04g14170D	BnaA04g14180D	BnaA04g14190D	BnaA04g14200D	BnaA04g14210D	BnaA04g14220D	BnaA04g14230D	BnaA04g14240D	BnaA04g14250D	BnaA04g14260D	BnaA04g14270D	BnaA04g14280D
	qSPWH16-C03-1	C03	8913528	3.87-4.46	0.03-0.12	1,3,5	BnaC03g17090D	BnaC03g17100D	BnaC03g17110D	BnaC03g17120D	BnaC03g17130D	BnaC03g17140D	BnaC03g17150D	BnaC03g17160D	BnaC03g17170D	BnaC03g17180D	BnaC03g17190D	BnaC03g17200D	BnaC03g17210D	BnaC03g17220D	BnaC03g17230D	BnaC03g17240D	BnaC03g17250D	BnaC03g17260D	BnaC03g17270D	BnaC03g17280D	BnaC03g17290D	BnaC03g17300D	BnaC03g17310D	BnaC03g17320D	BnaC03g17330D	BnaC03g17340D	BnaC03g17350D	BnaC03g17360D	BnaC03g17370D	BnaC03g17380D	BnaC03g17390D	BnaC03g17400D	BnaC03g17410D	BnaC03g17420D	BnaC03g17430D	BnaC03g17440D	BnaC03g17450D	BnaC03g17460D	BnaC03g17470D	BnaC03g17480D	BnaC03g17490D	BnaC03g17500D	BnaC03g17510D
	qSPWH16-C03-2	C03	16292168	3.18-3.62	1.08-1.79	1,2,5	BnaC03g27650D	BnaC03g27660D	BnaC03g27670D	BnaC03g27680D	BnaC03g27690D	BnaC03g27700D	BnaC03g27710D	BnaC03g27720D	BnaC03g27730D	BnaC03g27740D	BnaC03g27750D	BnaC03g27760D	BnaC03g27770D	BnaC03g27780D	BnaC03g27790D	BnaC03g27800D	BnaC03g27810D	BnaC03g27820D	BnaC03g27830D	BnaC03g27840D	BnaC03g27850D	BnaC03g27860D	BnaC03g27870D	BnaC03g27880D	BnaC03g27890D	BnaC03g27900D	BnaC03g27910D	BnaC03g27920D	BnaC03g27930D	BnaC03g27940D	BnaC03g27950D	BnaC03g27960D	BnaC03g27970D	BnaC03g27980D	BnaC03g27990D	BnaC03g28000D	BnaC03g28010D	BnaC03g28020D	BnaC03g28030D	BnaC03g28040D	BnaC03g28050D	BnaC03g28060D	BnaC03g28070D
	qSPWH16-C03-3	C03	30605297	5.00-6.14	0.98-2.41	2,3,5	BnaC03g45410D	BnaC03g45420D	BnaC03g45430D	BnaC03g45440D	BnaC03g45450D	BnaC03g45460D	BnaC03g45470D	BnaC03g45480D	BnaC03g45490D	BnaC03g45500D	BnaC03g45510D	BnaC03g45520D	BnaC03g45530D	BnaC03g45540D	BnaC03g45550D	BnaC03g45560D	BnaC03g45570D	BnaC03g45580D	BnaC03g45590D	BnaC03g45600D	BnaC03g45610D	BnaC03g45620D	BnaC03g45630D	BnaC03g45640D	BnaC03g45650D	BnaC03g45660D	BnaC03g45670D	BnaC03g45680D	BnaC03g45690D	BnaC03g45700D	BnaC03g45710D	BnaC03g45720D	BnaC03g45730D	BnaC03g45740D	BnaC03g45750D	BnaC03g45760D	BnaC03g45770D	BnaC03g45780D	BnaC03g45790D
	qSPWH16-C03-4	C03	34756232	3.38-6.03	0.54-3.24	2.3.5	BnaC03g49670D	BnaC03g49680D	BnaC03g49690D	BnaC03g49700D	BnaC03g49710D	BnaC03g49720D	BnaC03g49730D	BnaC03g49740D	BnaC03g49750D	BnaC03g49760D	BnaC03g49770D	BnaC03g49780D	BnaC03g49790D	BnaC03g49800D	BnaC03g49810D	BnaC03g49820D	BnaC03g49830D	BnaC03g49840D	BnaC03g49850D	BnaC03g49860D	BnaC03g49870D	BnaC03g49880D	BnaC03g49890D	BnaC03g49900D	BnaC03g49910D	BnaC03g49920D	BnaC03g49930D	BnaC03g49940D	BnaC03g49950D	BnaC03g49960D	BnaC03g49970D	BnaC03g49980D	BnaC03g49990D	BnaC03g50000D	BnaC03g50010D	BnaC03g50020D	BnaC03g50030D	BnaC03g50040D	BnaC03g50050D	BnaC03g50060D	BnaC03g50070D	BnaC03g50080D	BnaC03g50090D
	qSPWH16-C05-2	C05	21427076	3.89-8.87	1.08-4.84	1,2,3,4,5	BnaC05g26480D	BnaC05g26490D	BnaC05g26500D	BnaC05g26510D	BnaC05g26520D	BnaC05g26530D	BnaC05g26540D	BnaC05g26550D	BnaC05g26560D	BnaC05g26570D	BnaC05g26580D	BnaC05g26590D	BnaC05g26600D	BnaC05g26610D	BnaC05g26620D	BnaC05g26630D	BnaC05g26640D	BnaC05g26650D	BnaC05g26660D	BnaC05g26670D	BnaC05g26680D	BnaC05g26690D	BnaC05g26700D
	qSPWH16-C09-1	C09	46744189	3.08-7.24	0.87-3.71	2,4,5	BnaC09g46920D	BnaC09g46930D	BnaC09g46940D	BnaC09g46950D	BnaC09g46960D	BnaC09g46970D	BnaC09g46980D	BnaC09g46990D	BnaC09g47000D	BnaC09g47010D	BnaC09g47020D	BnaC09g47030D	BnaC09g47040D	BnaC09g47050D	BnaC09g47060D	BnaC09g47070D	BnaC09g47080D	BnaC09g47090D	BnaC09g47100D	BnaC09g47110D	BnaC09g47120D	BnaC09g47130D	BnaC09g47140D	BnaC09g47150D	BnaC09g47160D	BnaC09g47170D	BnaC09g47180D	BnaC09g47190D	BnaC09g47200D	BnaC09g47210D	BnaC09g47220D	BnaC09g47230D	BnaC09g47240D	BnaC09g47250D	BnaC09g47260D	BnaC09g47270D	BnaC09g47280D	BnaC09g47290D	BnaC09g47300D	BnaC09g47310D	BnaC09g47320D	BnaC09g47330D	BnaC09g47340D
Note, in the method, 1, 2, 3, 4, 5, and 6 represent mrMLM, FASTmrMLM, pLARmEB, pKWmEB, ISIS EM-BLASSO, and FASTmrEMMA.
[truncated: 94 more columns]

## Sheet: Table S6
Supplementary Table S6 Expression patterns of differentially expression genes (DEGs) between R01 and R56 with three periods
Gene ID	R01_2W	R01_3W	R01_4W	R56_2W	R56_3W	R56_4W	Arabidopsis	Annotation
BnaA01g00340D	1.8036	1.13972	0.928015	3.85088	3.48563	1.52377	AT4G37670	N-acetyl-l-glutamate synthase 2	N-acetyl-l-glutamate synthase 2 (NAGS2); FUNCTIONS IN: acetyl-CoA:L-glutamate N-acetyltransferase activity, N-acetyltransferase activity; INVOLVED IN: cellular amino acid biosynthetic process, arginine biosynthetic process, metabolic process; LOCATED IN: cytoplasm; EXPRESSED IN: 20 plant structures; EXPRESSED DURING: 12 growth stages; CONTAINS InterPro DOMAIN/s: GCN5-related N-acetyltransferase, …
BnaA01g00680D	0.69918	0.173388	0.00551533	2.40675	1.65253	1.11888	AT4G37250	Leucine-rich repeat protein kinase family protein	Leucine-rich repeat protein kinase family protein; FUNCTIONS IN: protein serine/threonine kinase activity, kinase activity, ATP binding; INVOLVED IN: transmembrane receptor protein tyrosine kinase signaling pathway, protein amino acid phosphorylation; LOCATED IN: endomembrane system; EXPRESSED IN: 22 plant structures; EXPRESSED DURING: 13 growth stages; CONTAINS InterPro DOMAIN/s: Protein kinase,…
BnaA01g00760D	1.30269	0.670726	0.146321	8.09586	8.02379	1.98713	AT4G36970	Remorin family protein	Remorin family protein; FUNCTIONS IN: DNA binding; LOCATED IN: plasma membrane, chloroplast; EXPRESSED IN: 22 plant structures; EXPRESSED DURING: 13 growth stages; CONTAINS InterPro DOMAIN/s: Remorin, C-terminal (InterPro:IPR005516); BEST Arabidopsis thaliana protein match is: Remorin family protein (TAIR:AT1G45207.2); Has 30201 Blast hits to 17322 proteins in 780 species: Archae - 12; Bacteria -…
BnaA01g01010D	0.144043	0.0803903	0.233364	1.85331	1.97858	2.91877	AT4G36820	Protein of unknown function (DUF607)	Protein of unknown function (DUF607); CONTAINS InterPro DOMAIN/s: Protein of unknown function DUF607 (InterPro:IPR006769); BEST Arabidopsis thaliana protein match is: Protein of unknown function (DUF607) (TAIR:AT2G23790.1); Has 370 Blast hits to 370 proteins in 122 species: Archae - 0; Bacteria - 0; Metazoa - 148; Fungi - 54; Plants - 129; Viruses - 0; Other Eukaryotes - 39 (source: NCBI BLink).
BnaA01g01080D	0.497716	0.482623	0.375029	4.23694	10.2934	6.69536	AT4G36750	Quinone reductase family protein	Quinone reductase family protein; FUNCTIONS IN: oxidoreductase activity, FMN binding; INVOLVED IN: negative regulation of transcription; LOCATED IN: plasma membrane; EXPRESSED IN: 24 plant structures; EXPRESSED DURING: 13 growth stages; CONTAINS InterPro DOMAIN/s: Flavoprotein WrbA (InterPro:IPR010089), Flavodoxin/nitric oxide synthase (InterPro:IPR008254); BEST Arabidopsis thaliana protein match…
BnaA01g01330D	0.0931173	0	0.689564	1.51406	0	0.300457	AT4G36360	beta-galactosidase 3	putative beta-galactosidase (BGAL3 gene)
BnaA01g01590D	8.99606	10.5629	9.93824	20.8787	23.5054	21.7435	AT4G35980	unknown protein; FUNCTIONS IN: molecular_function unknown; INVOLVED IN: biological_process unknown; LOCATED IN: cellular_component unknown; EXPRESSED IN: 24 plant structures; EXPRESSED DURING: 15 growth stages; Has 30201 Blast hits to 17322 proteins in 780 species: Archae - 12; Bacteria - 1396; Metazoa - 17338; Fungi - 3422; Plants - 5037; Viruses - 0; Other Eukaryotes - 2996 (source: NCBI BLink).	0
BnaA01g02300D	4.57055	6.27637	7.10847	2.14073	2.49441	2.27349	AT4G34900	xanthine dehydrogenase 2	xanthine dehydrogenase 2 (XDH2); FUNCTIONS IN: in 8 functions; INVOLVED IN: oxidation reduction, allantoin biosynthetic process; LOCATED IN: cellular_component unknown; CONTAINS InterPro DOMAIN/s: Aldehyde oxidase/xanthine dehydrogenase (InterPro:IPR016208), Ferredoxin (InterPro:IPR001041), Molybdopterin dehydrogenase, FAD-binding (InterPro:IPR002346), Beta-grasp fold, ferredoxin-type (InterPro:I…
BnaA01g03280D	0	0	0	1.16175	0.529938	0.658651	AT4G33690	unknown protein; FUNCTIONS IN: molecular_function unknown; INVOLVED IN: biological_process unknown; LOCATED IN: chloroplast; EXPRESSED IN: pollen tube; Has 543 Blast hits to 512 proteins in 106 species: Archae - 0; Bacteria - 0; Metazoa - 281; Fungi - 54; Plants - 72; Viruses - 0; Other Eukaryotes - 136 (source: NCBI BLink).	0
BnaA01g03300D	4.06675	4.03135	5.41723	0.093056	0.0646943	0.324176	AT4G33666	unknown protein; FUNCTIONS IN: molecular_function unknown; INVOLVED IN: biological_process unknown; LOCATED IN: chloroplast; EXPRESSED IN: 19 plant structures; EXPRESSED DURING: 11 growth stages; Has 30201 Blast hits to 17322 proteins in 780 species: Archae - 12; Bacteria - 1396; Metazoa - 17338; Fungi - 3422; Plants - 5037; Viruses - 0; Other Eukaryotes - 2996 (source: NCBI BLink).	0
BnaA01g03330D	50.5726	67.6625	43.9057	0.005966	0.0396317	0.00767633	AT4G33640	unknown protein; Has 30201 Blast hits to 17322 proteins in 780 species: Archae - 12; Bacteria - 1396; Metazoa - 17338; Fungi - 3422; Plants - 5037; Viruses - 0; Other Eukaryotes - 2996 (source: NCBI BLink).	0
BnaA01g03460D	7.10183	4.62498	2.75031	2.00344	1.28644	2.8529	AT4G33470	histone deacetylase 14	Encodes HDA14, a member of the histone deacetylase family proteins that can deacetylate a-tubulin, associates with a/b-tubulin and is retained on GTP/taxol-stabilized microtubules, at least in part, by direct association with the PP2A-A2 subunit. The association of a histone deacetylase with PP2A suggests a direct link between protein phosphorylation and acetylation.
BnaA01g04790D	0	0	0.0378493	20.5937	22.3734	14.0675	AT4G32130	Protein of unknown function (DUF2012)	FUNCTIONS IN: carbohydrate binding; INVOLVED IN: biological_process unknown; LOCATED IN: endoplasmic reticulum; EXPRESSED IN: male gametophyte, callus, pollen tube; EXPRESSED DURING: L mature pollen stage, M germinated pollen stage; CONTAINS InterPro DOMAIN/s: Carbohydrate-binding-like fold (InterPro:IPR013784), Protein of unknown function DUF2012 (InterPro:IPR019008); BEST Arabidopsis thaliana p…
BnaA01g05110D	11.1715	8.52327	9.3219	27.2695	29.2616	21.8629	AT4G31720	TBP-associated factor II 15	Arabidopsis thaliana putative TBP-associated 15 kDa subunit protein (TAFII15)
BnaA01g05130D	31.8754	24.4535	21.185	42.0416	35.2433	25.5465	AT4G31700	ribosomal protein S6	Encodes a putative ribosomal protein S6 (rps6a). RPS6A and RPS6B are fully redundant and essential during gametogenesis.
BnaA01g05300D	10.161	16.674	16.3391	0.724811	0.529599	1.65601	AT4G39080	vacuolar proton ATPase A3	Vacuolar proton ATPase subunit VHA-a isoform 3. Localized in the tonoplast.
BnaA01g05890D	1.36547	1.39809	1.23961	10.8354	5.87016	4.84696	AT4G31360	selenium binding	selenium binding; FUNCTIONS IN: selenium binding; INVOLVED IN: cell redox homeostasis; EXPRESSED IN: 22 plant structures; EXPRESSED DURING: 12 growth stages; CONTAINS InterPro DOMAIN/s: Selenoprotein, Rdx type (InterPro:IPR011893); BEST Arabidopsis thaliana protein match is: selenium binding (TAIR:AT2G24440.1); Has 221 Blast hits to 197 proteins in 65 species: Archae - 0; Bacteria - 10; Metazoa -…
BnaA01g06020D	0	0	0	11.014	13.1707	11.5441	AT4G31170	Protein kinase superfamily protein	Protein kinase superfamily protein; FUNCTIONS IN: protein serine/threonine/tyrosine kinase activity, kinase activity; INVOLVED IN: protein amino acid phosphorylation; LOCATED IN: cellular_component unknown; EXPRESSED IN: 22 plant structures; EXPRESSED DURING: 13 growth stages; CONTAINS InterPro DOMAIN/s: Protein kinase, catalytic domain (InterPro:IPR000719), Serine-threonine/tyrosine-protein kina…
BnaA01g07720D	1.93861	4.1039	2.20196	0.554603	1.81947	0.373335	-	-	-
BnaA01g07790D	0.770869	0.44432	0.077956	0	0.057562	0	-	-	-
BnaA01g07920D	0.801438	0.936695	0.700881	0.710719	1.23396	0.688447	AT4G29000	Tesmin/TSO1-like CXC domain-containing protein	Tesmin/TSO1-like CXC domain-containing protein; CONTAINS InterPro DOMAIN/s: Tesmin/TSO1-like, CXC (InterPro:IPR005172); BEST Arabidopsis thaliana protein match is: Tesmin/TSO1-like CXC domain-containing protein (TAIR:AT2G20110.1); Has 1016 Blast hits to 666 proteins in 93 species: Archae - 0; Bacteria - 0; Metazoa - 285; Fungi - 4; Plants - 322; Viruses - 0; Other Eukaryotes - 405 (source: NCBI B…
BnaA01g08060D	0.165509	0	0.048872	0.133999	0.144214	0.117955	AT4G28820	HIT-type Zinc finger family protein	HIT-type Zinc finger family protein; CONTAINS InterPro DOMAIN/s: Zinc finger, HIT-type (InterPro:IPR007529); Has 375 Blast hits to 372 proteins in 152 species: Archae - 0; Bacteria - 2; Metazoa - 132; Fungi - 117; Plants - 47; Viruses - 0; Other Eukaryotes - 77 (source: NCBI BLink).
BnaA01g08710D	16.5165	17.6977	28.4081	5.33153	7.83319	12.0914	AT4G17840	FUNCTIONS IN: molecular_function unknown; INVOLVED IN: biological_process unknown; LOCATED IN: chloroplast, membrane; EXPRESSED IN: 23 plant structures; EXPRESSED DURING: 13 growth stages; CONTAINS InterPro DOMAIN/s: Abortive infection protein (InterPro:IPR003675); BEST Arabidopsis thaliana protein match is: unknown protein (TAIR:AT2G35260.1); Has 30201 Blast hits to 17322 proteins in 780 species…	0
BnaA01g09930D	3.38969	3.87662	3.87117	6.59998	7.38072	7.39143	AT4G19190	zinc knuckle (CCHC-type) family protein	zinc knuckle (CCHC-type) family protein; FUNCTIONS IN: zinc ion binding, nucleic acid binding; INVOLVED IN: biological_process unknown; LOCATED IN: cellular_component unknown; CONTAINS InterPro DOMAIN/s: CBF1-interacting co-repressor CIR, N-terminal (InterPro:IPR019339), Zinc finger, CCHC-type (InterPro:IPR001878); Has 30201 Blast hits to 17322 proteins in 780 species: Archae - 12; Bacteria - 139…
BnaA01g10370D	20.7378	15.2634	13.0203	7.54186	6.63879	9.26629	AT4G20030	RNA-binding (RRM/RBD/RNP motifs) family protein	RNA-binding (RRM/RBD/RNP motifs) family protein; FUNCTIONS IN: RNA binding, nucleotide binding, nucleic acid binding; INVOLVED IN: biological_process unknown; LOCATED IN: nucleus; EXPRESSED IN: 21 plant structures; EXPRESSED DURING: 13 growth stages; CONTAINS InterPro DOMAIN/s: RNA recognition motif, RNP-1 (InterPro:IPR000504), Nucleotide-binding, alpha-beta plait (InterPro:IPR012677); BEST Arabi…
BnaA01g10490D	11.5304	10.1222	10.8066	0	0	0	AT4G20280	TBP-associated factor 11	Encodes TAF11, a putative TBP-associated factor (TBP: TATA binding protein).
BnaA01g12280D	0.794863	0.543225	0.304547	0.0630257	0.675277	0	AT4G22540	OSBP(oxysterol binding protein)-related protein 2A	OSBP(oxysterol binding protein)-related protein 2A (ORP2A); CONTAINS InterPro DOMAIN/s: Pleckstrin homology-type (InterPro:IPR011993), Oxysterol-binding protein (InterPro:IPR000648), Pleckstrin homology (InterPro:IPR001849); BEST Arabidopsis thaliana protein match is: OSBP(oxysterol binding protein)-related protein 2B (TAIR:AT4G12460.1); Has 30201 Blast hits to 17322 proteins in 780 species: Arch…
BnaA01g12370D	0.349012	8.70463	21.3775	0	0	0	AT4G22680	myb domain protein 85	Encodes a putative transcription factor (MYB85).
BnaA01g12510D	5.165	2.60557	1.97752	14.264	11.2811	15.3793	AT4G22830	unknown protein; FUNCTIONS IN: molecular_function unknown; INVOLVED IN: biological_process unknown; LOCATED IN: chloroplast; EXPRESSED IN: 20 plant structures; EXPRESSED DURING: 13 growth stages; CONTAINS InterPro DOMAIN/s: Protein of unknown function DUF2499 (InterPro:IPR019634); Has 319 Blast hits to 317 proteins in 103 species: Archae - 0; Bacteria - 147; Metazoa - 0; Fungi - 0; Plants - 64; V…	0
BnaA01g12520D	0.290851	0.236387	0.178575	0.276012	0.3467	0.137566	AT4G22860	Cell cycle regulated microtubule associated protein	Cell cycle regulated microtubule associated protein; CONTAINS InterPro DOMAIN/s: Cell cycle regulated microtubule associated protein (InterPro:IPR022021); BEST Arabidopsis thaliana protein match is: Cell cycle regulated microtubule associated protein (TAIR:AT4G11990.1); Has 112 Blast hits to 104 proteins in 26 species: Archae - 0; Bacteria - 0; Metazoa - 14; Fungi - 3; Plants - 89; Viruses - 0; O…
BnaA01g12530D	0.105944	1.37021	0.0598267	5.44019	64.7906	23.3292	AT4G22880	leucoanthocyanidin dioxygenase	encodes leucoanthocyanidin dioxygenase, which is involved in proanthocyanin biosynthesis. Mutant analysis suggests that this gene is also involved in vacuole formation.
BnaA01g13000D	1.20081	1.29453	1.65509	6.89293	7.59334	5.65831	AT4G23330	BEST Arabidopsis thaliana protein match is: eukaryotic translation initiation factor 3A (TAIR:AT4G11420.1); Has 63 Blast hits to 55 proteins in 14 species: Archae - 0; Bacteria - 0; Metazoa - 1; Fungi - 0; Plants - 62; Viruses - 0; Other Eukaryotes - 0 (source: NCBI BLink).	0
BnaA01g13340D	2.23523	2.21115	2.38223	0.0622193	0.0757297	0.0458313	AT4G23660	polyprenyltransferase 1	Encodes para-hydroxy benzoate polyprenyl diphosphate transferase. The enzyme was shown to be able to use a wide range of prenyl substrates : from GPP (C10) to decaprenyl diphosphate (C50).
BnaA01g13350D	0.162112	0.172575	0.315121	30.7587	27.4165	47.3367	AT4G23680	Polyketide cyclase/dehydrase and lipid transport superfamily protein	Polyketide cyclase/dehydrase and lipid transport superfamily protein; FUNCTIONS IN: molecular_function unknown; INVOLVED IN: response to biotic stimulus, defense response; LOCATED IN: cellular_component unknown; EXPRESSED IN: 19 plant structures; EXPRESSED DURING: 9 growth stages; CONTAINS InterPro DOMAIN/s: Bet v I allergen (InterPro:IPR000916); BEST Arabidopsis thaliana protein match is: Polyke…
BnaA01g13370D	8.40521	7.2114	5.05522	4.67223	3.80268	1.21927	AT4G23710	vacuolar ATP synthase subunit G2	vacuolar ATP synthase subunit G2 (VAG2); FUNCTIONS IN: hydrolase activity, acting on acid anhydrides, catalyzing transmembrane movement of substances; INVOLVED IN: proton transport; LOCATED IN: plasma membrane, vacuole; EXPRESSED IN: 25 plant structures; EXPRESSED DURING: 15 growth stages; CONTAINS InterPro DOMAIN/s: Vacuolar (H+)-ATPase G subunit (InterPro:IPR005124); BEST Arabidopsis thaliana p…
BnaA01g13770D	0.876394	1.55076	0.91153	15.4841	8.65573	4.40983	AT4G24275	Identified as a screen for stress-responsive genes.	unknown protein; Has 11 Blast hits to 11 proteins in 4 species: Archae - 0; Bacteria - 0; Metazoa - 0; Fungi - 0; Plants - 11; Viruses - 0; Other Eukaryotes - 0 (source: NCBI BLink).
BnaA01g13800D	5.12397	5.36401	5.32961	6.47429	7.06082	6.17334	AT4G24290	MAC/Perforin domain-containing protein	MAC/Perforin domain-containing protein; FUNCTIONS IN: molecular_function unknown; INVOLVED IN: biological_process unknown; LOCATED IN: plasma membrane; EXPRESSED IN: 18 plant structures; EXPRESSED DURING: 9 growth stages; CONTAINS InterPro DOMAIN/s: Membrane attack complex component/perforin (MACPF) domain (InterPro:IPR020864), Membrane attack complex component/perforin (MACPF) domain, metazoa (I…
BnaA01g13980D	0.014283	0.017563	0.0170793	0.050429	0.270765	0.109351	-	-	-
BnaA01g13990D	2.11534	1.68451	1.03385	3.42017	6.29331	2.29421	AT4G24620	phosphoglucose isomerase 1	The PGI1 gene encodes the plastid phospho-glucose (Glc) isomerase. While pgi1-1 mutant has a deficiency in leaf starch synthesis, it accumulates starch in root cap cells. Flowering time of the pgi1-1 mutant is significantly delayed under short-day conditions.
BnaA01g14340D	0	0	0	7.61065	11.7995	6.56604	AT4G24972	tapetum determinant 1	Encodes a novel small protein which is similar to proteins of unknown function from other plant species. TPD1 is involved in cell specification during anther and pollen development. Identified in a screen for male steriles. Mutants lack tapetal cells and have an increased number of microsporocytes. Expressed in flower buds, leaves and young seedlings. In anthers, TPD1 is expressed throughout poll…
BnaA01g14590D	0	0	0	0.0197063	0.05115	0.00128467	AT4G25230	RPM1 interacting protein 2	RPM1 interacting protein 2, has a CUE domain which is sufficient for the interaction with RPM1.Positive regulator of RPM1 and PRS2 mediated hypersensitive response.Functions as ubiquitin ligase and binds to RPM1.
BnaA01g14730D	0.0445383	0	0.064598	0.000196333	0.125361	0.00274567	AT4G25360	TRICHOME BIREFRINGENCE-LIKE 18	Encodes a member of the TBL (TRICHOME BIREFRINGENCE-LIKE) gene family containing a plant-specific DUF231 (domain of unknown function) domain. TBL gene family has 46 members, two of which (TBR/AT5G06700 and TBL3/AT5G01360) have been shown to be involved in the synthesis and deposition of secondary wall cellulose, presumably by influencing the esterification state of pectic polymers. A nomenclature…
BnaA01g14860D	52.7596	35.5984	31.6964	72.9793	60.1648	31.4055	AT4G25630	fibrillarin 2	encodes a fibrillarin, a key nucleolar protein in eukaryotes which associates with box C/D small nucleolar RNAs (snoRNAs) directing 2'-O-ribose methylation of the rRNA. This gene also encodes a novel box C/D snoRNA, U60.2f in its fifth intron that accumulates in seedlings and that their targeted residue on the 25 S rRNA is methylated.
BnaA01g15060D	0	0	0	0.006441	0.0101287	0.00343733	AT4G25880	pumilio 6	Encodes a member of the Arabidopsis Pumilio (APUM) proteins containing PUF domain (eight repeats of approximately 36 amino acids each). PUF proteins regulate both mRNA stability and translation through sequence-specific binding to the 3' UTR of target mRNA transcripts.
BnaA01g15900D	0.988505	1.54691	0.909678	9.93153	9.56655	6.21948	AT4G26780	Co-chaperone GrpE family protein	unknown function
BnaA01g15910D	2.15504	0.216348	0	14.2809	7.50889	1.01904	AT4G26790	GDSL-like Lipase/Acylhydrolase superfamily protein	GDSL-motif esterase/acyltransferase/lipase. Enzyme group with broad substrate specificity that may catalyze acyltransfer or hydrolase reactions with lipid and non-lipid substrates.
BnaA01g16560D	4.15267	6.06969	5.55674	13.259	11.8909	9.04084	AT4G27585	SPFH/Band 7/PHB domain-containing membrane-associated protein family	SPFH/Band 7/PHB domain-containing membrane-associated protein family; FUNCTIONS IN: zinc ion binding; INVOLVED IN: biological_process unknown; LOCATED IN: mitochondrion, membrane; EXPRESSED IN: callus, leaf; CONTAINS InterPro DOMAIN/s: Band 7 protein (InterPro:IPR001107); BEST Arabidopsis thaliana protein match is: SPFH/Band 7/PHB domain-containing membrane-associated protein family (TAIR:AT5G541…
BnaA01g17350D	4.76021	5.36936	4.73524	29.7847	25.1889	18.0776	AT4G16450	unknown protein; FUNCTIONS IN: molecular_function unknown; INVOLVED IN: photorespiration; LOCATED IN: mitochondrion, mitochondrial membrane, mitochondrial respiratory chain complex I, respiratory chain complex I, membrane; EXPRESSED IN: 25 plant structures; EXPRESSED DURING: 15 growth stages; Has 30201 Blast hits to 17322 proteins in 780 species: Archae - 12; Bacteria - 1396; Metazoa - 17338; Fun…	0
BnaA01g17480D	0.00912267	0.0548263	0.039306	0.447687	0.304235	0.206599	AT4G16350	calcineurin B-like protein 6	Calcium sensor protein. Binds CIPK14.
BnaA01g17570D	317.924	434.07	327.242	29.8173	39.2783	22.4456	AT4G16190	Papain family cysteine protease	Papain family cysteine protease; FUNCTIONS IN: cysteine-type peptidase activity, cysteine-type endopeptidase activity; INVOLVED IN: proteolysis; LOCATED IN: vacuole; EXPRESSED IN: 23 plant structures; EXPRESSED DURING: 13 growth stages; CONTAINS InterPro DOMAIN/s: Peptidase C1A, papain (InterPro:IPR013128), Proteinase inhibitor I29, cathepsin propeptide (InterPro:IPR013201), Peptidase C1A, papain…
BnaA01g17700D	3.30549	1.99338	0.842653	9.04955	6.64349	2.84005	AT4G16141	GATA type zinc finger transcription factor family protein	GATA type zinc finger transcription factor family protein; FUNCTIONS IN: sequence-specific DNA binding, zinc ion binding, sequence-specific DNA binding transcription factor activity; INVOLVED IN: regulation of transcription, DNA-dependent; CONTAINS InterPro DOMAIN/s: Zinc finger, NHR/GATA-type (InterPro:IPR013088), Zinc finger, GATA-type (InterPro:IPR000679); BEST Arabidopsis thaliana protein mat…
BnaA01g18190D	0.241563	0.180075	0.221137	0	0	0	-	-	-
BnaA01g18440D	0.0187913	0.0579737	0.108819	0	0	0	.	-	-
BnaA01g19280D	12.5467	8.62768	10.4076	4.27979	6.78263	9.57559	AT3G51820	UbiA prenyltransferase family protein	Encodes a protein with chlorophyll synthase activity. This enzyme has been shown to perform the esterification of chlorophyllide (a and b), the last step of chlorophyll biosynthesis. Although it can use either geranylgeranyl pyrophosphate (GGPP) or phytyl pyrophosphate (PhyPP) as substrates, the esterification reaction was faster with GGPP than with PhyPP.
BnaA01g19460D	1.39994	2.53026	2.58563	33.3355	105.52	36.2294	AT3G51450	Calcium-dependent phosphotriesterase superfamily protein	Calcium-dependent phosphotriesterase superfamily protein; FUNCTIONS IN: strictosidine synthase activity; INVOLVED IN: alkaloid biosynthetic process, biosynthetic process; LOCATED IN: endomembrane system; EXPRESSED IN: 22 plant structures; EXPRESSED DURING: 13 growth stages; CONTAINS InterPro DOMAIN/s: Strictosidine synthase (InterPro:IPR004141), Strictosidine synthase, conserved region (InterPro:…
BnaA01g19490D	5.27974	3.90266	3.59599	0.092125	0.244798	0	AT3G51390	DHHC-type zinc finger family protein	DHHC-type zinc finger family protein; FUNCTIONS IN: zinc ion binding; INVOLVED IN: biological_process unknown; LOCATED IN: plasma membrane; EXPRESSED IN: 25 plant structures; EXPRESSED DURING: 15 growth stages; CONTAINS InterPro DOMAIN/s: Zinc finger, DHHC-type (InterPro:IPR001594); BEST Arabidopsis thaliana protein match is: DHHC-type zinc finger family protein (TAIR:AT3G56930.1); Has 4950 Blast…
BnaA01g19500D	0	0	0	0	0	0.338463	AT3G51370	Protein phosphatase 2C family protein	Protein phosphatase 2C family protein; FUNCTIONS IN: protein serine/threonine phosphatase activity, catalytic activity; INVOLVED IN: protein amino acid dephosphorylation; LOCATED IN: plasma membrane; EXPRESSED IN: 22 plant structures; EXPRESSED DURING: 13 growth stages; CONTAINS InterPro DOMAIN/s: Protein phosphatase 2C, manganese/magnesium aspartate binding site (InterPro:IPR000222), Protein pho…
BnaA01g19550D	0	0	0	0	0.062732	0	AT3G51230	BEST Arabidopsis thaliana protein match is: Chalcone-flavanone isomerase family protein (TAIR:AT5G66230.1); Has 39 Blast hits to 39 proteins in 11 species: Archae - 0; Bacteria - 0; Metazoa - 0; Fungi - 0; Plants - 39; Viruses - 0; Other Eukaryotes - 0 (source: NCBI BLink).	0
BnaA01g20830D	0	0	0	0.042865	0.004859	0.0788897	-	-	-
BnaA01g20940D	0	0	0	0.979746	0.69425	0.411176	.	-	-
BnaA01g21580D	0	0	0	0.027533	0.32569	0.255495	AT1G58110	Basic-leucine zipper (bZIP) transcription factor family protein	Basic-leucine zipper (bZIP) transcription factor family protein; FUNCTIONS IN: protein dimerization activity, sequence-specific DNA binding, DNA binding, sequence-specific DNA binding transcription factor activity; INVOLVED IN: regulation of transcription, DNA-dependent; LOCATED IN: cellular_component unknown; EXPRESSED IN: 23 plant structures; EXPRESSED DURING: 13 growth stages; CONTAINS InterPr…
BnaA01g21870D	0.368703	0.399686	0.33134	0.220504	0.27323	0.167404	AT1G59520	CW7	Encodes CW7.
BnaA01g22270D	0	0.006505	0.0339727	0.86041	1.37937	0.654908	.	-	-
BnaA01g23100D	0.676914	0.234059	0.219167	0.266323	0.488315	0.252766	AT1G60900	U2 snRNP auxilliary factor, large subunit, splicing factor	U2 snRNP auxilliary factor, large subunit, splicing factor; FUNCTIONS IN: RNA binding, nucleotide binding, nucleic acid binding; INVOLVED IN: mRNA processing; LOCATED IN: nucleus; CONTAINS InterPro DOMAIN/s: RNA recognition motif, RNP-1 (InterPro:IPR000504), Nucleotide-binding, alpha-beta plait (InterPro:IPR012677), U2 snRNP auxilliary factor, large subunit, splicing factor (InterPro:IPR006529); …
BnaA01g23640D	11.3932	8.1887	7.96088	0	0	0.0291847	.	-	-
BnaA01g23900D	0.101303	0.021312	0.0339783	0.063946	0.0655013	0.013059	AT3G23280	XB3 ortholog 5 in Arabidopsis thaliana	Encodes a ubiquitin ligase that is a novel player in ethylene signaling involved in negatively regulating apical hook curvature, with alternative splicing controlling dual targeting to the nuclear and cytoplasmic compartments.
BnaA01g24490D	0.128505	0.18796	0.12028	0	0	0	.	-	-
BnaA01g24950D	6.16667e-05	8.33333e-05	0	0	0.000361	0	AT3G21690	MATE efflux family protein	MATE efflux family protein; FUNCTIONS IN: antiporter activity, drug transmembrane transporter activity, transporter activity; INVOLVED IN: drug transmembrane transport, transmembrane transport; LOCATED IN: plasma membrane, membrane; EXPRESSED IN: 23 plant structures; EXPRESSED DURING: 13 growth stages; CONTAINS InterPro DOMAIN/s: Multi antimicrobial extrusion protein MatE (InterPro:IPR002528); BE…
BnaA01g25140D	0.574044	0.493691	0.870283	4.84597	2.40619	2.05642	AT3G21420	2-oxoglutarate (2OG) and Fe(II)-dependent oxygenase superfamily protein	2-oxoglutarate (2OG) and Fe(II)-dependent oxygenase superfamily protein; FUNCTIONS IN: oxidoreductase activity; INVOLVED IN: metabolic process; LOCATED IN: cellular_component unknown; EXPRESSED IN: 16 plant structures; EXPRESSED DURING: 8 growth stages; CONTAINS InterPro DOMAIN/s: Oxoglutarate/iron-dependent oxygenase (InterPro:IPR005123); BEST Arabidopsis thaliana protein match is: senescence-re…
BnaA01g25370D	0.159564	0.203442	0.168453	0	0	0	-	-	-
BnaA01g25500D	0.00205467	0.001329	0.00110367	0	0	0	AT3G20910	nuclear factor Y, subunit A9	nuclear factor Y, subunit A9 (NF-YA9); FUNCTIONS IN: sequence-specific DNA binding transcription factor activity, specific transcriptional repressor activity; INVOLVED IN: negative regulation of gene-specific transcription, regulation of transcription, DNA-dependent; LOCATED IN: CCAAT-binding factor complex, nucleus; EXPRESSED IN: 16 plant structures; EXPRESSED DURING: 9 growth stages; CONTAINS I…
BnaA01g25900D	16.8341	22.8426	21.8568	16.7497	13.8966	11.2944	AT3G19760	eukaryotic initiation factor 4A-III	Encodes an RNA helicase that may be a component of the Exon Junction Complex. Subcellular localization is modulated by stress. Under normal conditions it is localized to the nuceloplasm but under hyopoxic conditions it localizes to the nucleolus and splicing speckles.
BnaA01g25960D	7.95084	2.65477	2.00294	0.285266	0.212463	0.0460127	.	-	-
BnaA01g26060D	0.011591	0.00594633	0.0128067	0.847299	0.739355	0.245097	-	-	-
BnaA01g26470D	1.63507	2.2587	1.4357	27.6198	19.9814	17.2047	AT3G18820	RAB GTPase homolog G3F	RAB GTPase homolog G3F (RAB7B); FUNCTIONS IN: GTP binding; INVOLVED IN: protein transport, small GTPase mediated signal transduction; LOCATED IN: plasma membrane, nucleus; EXPRESSED IN: 26 plant structures; EXPRESSED DURING: 13 growth stages; CONTAINS InterPro DOMAIN/s: Ras GTPase (InterPro:IPR001806), Small GTP-binding protein (InterPro:IPR005225), Small GTPase (InterPro:IPR020851), Ras (InterPr…
BnaA01g26560D	0	0.0277527	0	135.161	66.7581	43.4339	AT3G18740	Ribosomal protein L7Ae/L30e/S12e/Gadd45 family protein	The gene encodes a putative leucine-rich repeat (LRR)Receptor-like kinase (RLK).
BnaA01g26630D	0	0	0.00741433	0	0	0	AT3G18640	Zinc finger C-x8-C-x5-C-x3-H type family protein	Zinc finger C-x8-C-x5-C-x3-H type family protein; FUNCTIONS IN: zinc ion binding, nucleic acid binding; EXPRESSED IN: 18 plant structures; EXPRESSED DURING: 10 growth stages; CONTAINS InterPro DOMAIN/s: Zinc finger, CCCH-type (InterPro:IPR000571); BEST Arabidopsis thaliana protein match is: histone-lysine N-methyltransferases (TAIR:AT3G26850.2); Has 2096 Blast hits to 1919 proteins in 216 species…
BnaA01g26640D	0	0	0	2.612	2.16998	0.942141	AT3G18630	uracil dna glycosylase	Encodes a uracil-DNA glycosylase (UDG) involved in a base excision DNA repair pathway in mitochondria.
BnaA01g26670D	0	0	0	5.23202	2.79068	0.852253	AT3G18580	Nucleic acid-binding, OB-fold-like protein	Nucleic acid-binding, OB-fold-like protein; FUNCTIONS IN: single-stranded DNA binding; INVOLVED IN: biological_process unknown; CONTAINS InterPro DOMAIN/s: Nucleic acid-binding, OB-fold-like (InterPro:IPR016027), Nucleic acid-binding, OB-fold (InterPro:IPR012340), Primosome PriB/single-strand DNA-binding (InterPro:IPR000424); BEST Arabidopsis thaliana protein match is: mitochondrially targeted si…
BnaA01g26690D	0.198042	0.048017	0.0941687	17.215	14.7775	5.23962	AT3G18560	unknown protein; BEST Arabidopsis thaliana protein match is: unknown protein (TAIR:AT1G49000.1); Has 95 Blast hits to 95 proteins in 13 species: Archae - 0; Bacteria - 0; Metazoa - 0; Fungi - 0; Plants - 95; Viruses - 0; Other Eukaryotes - 0 (source: NCBI BLink).	0
BnaA01g26720D	0.02936	0.0452387	0.0159037	147.57	81.1672	50.0121	AT3G18490	Eukaryotic aspartyl protease family protein	Encodes ASPG1 (ASPARTIC PROTEASE IN GUARD CELL 1). Functions in drought avoidance through abscisic acid (ABA) signalling in guard cells.
BnaA01g26730D	0	0.053341	0.048131	13.2306	9.2187	6.11491	AT3G18480	CCAAT-displacement protein alternatively spliced product	This gene is predicted to encode a protein that functions as a Golgi apparatus structural component, known as a golgin in mammals and yeast. A fluorescently-tagged version of CASP co-localizes with Golgi markers, and this localization appears to require the C-terminal (565–689aa) portion of the protein. The protein is inserted into a membrane in a type II orientation.
BnaA01g26750D	0	0.025583	0	116.957	76.2538	67.2251	AT3G18410	Complex I subunit NDUFS6	Complex I subunit NDUFS6; CONTAINS InterPro DOMAIN/s: NADH-ubiquinone oxidoreductase, subunit 10 (InterPro:IPR019377), Complex I subunit NDUFS6 (InterPro:IPR020163); BEST Arabidopsis thaliana protein match is: Complex I subunit NDUFS6 (TAIR:AT1G49140.1); Has 165 Blast hits to 165 proteins in 75 species: Archae - 0; Bacteria - 0; Metazoa - 6; Fungi - 92; Plants - 61; Viruses - 0; Other Eukaryotes …
BnaA01g26780D	0	0	0	4.90799	2.15542	2.1684	AT3G18380	sequence-specific DNA binding transcription factors;sequence-specific DNA binding	sequence-specific DNA binding transcription factors;sequence-specific DNA binding; FUNCTIONS IN: sequence-specific DNA binding, sequence-specific DNA binding transcription factor activity; INVOLVED IN: regulation of transcription, DNA-dependent; EXPRESSED IN: 22 plant structures; EXPRESSED DURING: 13 growth stages; CONTAINS InterPro DOMAIN/s: Homeobox (InterPro:IPR001356); BEST Arabidopsis thalia…
BnaA01g26800D	0	0	0	0.0824333	0.549888	0.00414333	AT3G18350	Plant protein of unknown function (DUF639)	Plant protein of unknown function (DUF639); CONTAINS InterPro DOMAIN/s: Protein of unknown function DUF639 (InterPro:IPR006927); BEST Arabidopsis thaliana protein match is: Plant protein of unknown function (DUF639) (TAIR:AT1G48840.1); Has 149 Blast hits to 146 proteins in 12 species: Archae - 0; Bacteria - 0; Metazoa - 0; Fungi - 0; Plants - 149; Viruses - 0; Other Eukaryotes - 0 (source: NCBI B…
BnaA01g26820D	0.209627	0.370521	0.279363	3.3567	3.10746	4.59513	AT3G18290	zinc finger protein-related	Encodes BRUTUS (BTS), a putative E3 ligase protein with metal ion binding and DNA binding domains, which negatively regulates the response to iron deficiency.
BnaA01g26840D	0.015496	0.0195233	0.00721867	7.66609	6.23546	5.31511	AT3G18215	Protein of unknown function, DUF599	Protein of unknown function, DUF599; CONTAINS InterPro DOMAIN/s: Protein of unknown function DUF599 (InterPro:IPR006747); BEST Arabidopsis thaliana protein match is: Protein of unknown function, DUF599 (TAIR:AT5G24600.2); Has 303 Blast hits to 303 proteins in 73 species: Archae - 0; Bacteria - 107; Metazoa - 0; Fungi - 0; Plants - 182; Viruses - 0; Other Eukaryotes - 14 (source: NCBI BLink).
BnaA01g26860D	0	0.00337	0.00357733	13.7403	8.45017	5.89428	AT3G18190	TCP-1/cpn60 chaperonin family protein	TCP-1/cpn60 chaperonin family protein; FUNCTIONS IN: unfolded protein binding, ATP binding; INVOLVED IN: response to cadmium ion; EXPRESSED IN: 24 plant structures; EXPRESSED DURING: 15 growth stages; CONTAINS InterPro DOMAIN/s: Chaperonin Cpn60/TCP-1 (InterPro:IPR002423), Chaperone, tailless complex polypeptide 1 (InterPro:IPR017998), Chaperonin TCP-1, conserved site (InterPro:IPR002194), T-comp…
BnaA01g26900D	0.417393	0.212901	0.401648	3.00374	1.86485	1.60519	.	-	-
BnaA01g26910D	0.0160967	0	0.006766	1.7613	1.47767	1.21569	-	-	-
BnaA01g26950D	3.11672	2.74491	3.01853	19.3521	15.2841	11.4874	AT3G18160	peroxin 3-1	peroxin 3-1 (PEX3-1); FUNCTIONS IN: molecular_function unknown; INVOLVED IN: peroxisome organization; LOCATED IN: mitochondrion, peroxisome, integral to peroxisomal membrane; EXPRESSED IN: 23 plant structures; EXPRESSED DURING: 13 growth stages; CONTAINS InterPro DOMAIN/s: Peroxin-3 (InterPro:IPR006966); BEST Arabidopsis thaliana protein match is: peroxin 3 (TAIR:AT1G48635.1); Has 315 Blast hits …
BnaA01g26980D	0.471144	0.189947	0.149377	63.1824	31.6491	14.9035	AT3G18130	receptor for activated C kinase 1C	Encodes a protein with similarity to mammalian RACKs. RACKs function to shuttle activated protein kinase C to different subcellular sites and may also function as a scaffold through physical interactions with other proteins. RACK1C has no phenotype on its own and probably acts redundantly with RACK1A and RACK1B.
BnaA01g27000D	0.178487	0.12655	0.065578	111.804	41.2037	23.2601	AT3G18080	B-S glucosidase 44	B-S glucosidase 44 (BGLU44); FUNCTIONS IN: in 6 functions; INVOLVED IN: carbohydrate metabolic process; LOCATED IN: cytosolic ribosome, cell wall, plant-type cell wall; EXPRESSED IN: 22 plant structures; EXPRESSED DURING: 13 growth stages; CONTAINS InterPro DOMAIN/s: Glycoside hydrolase, family 1 (InterPro:IPR001360), Glycoside hydrolase, catalytic core (InterPro:IPR017853), Glycoside hydrolase, …
BnaA01g27090D	0	0.00681933	0	59.6944	25.3984	19.6225	AT3G18035	winged-helix DNA-binding transcription factor family protein	A linker histone like protein
BnaA01g27100D	0	0	0	14.1167	8.55052	4.9696	AT3G18030	HAL3-like protein A	flavin mononucleotide flavoprotein involved in salt and osmotic tolerance HAL3A encodes for phosphopantothenoylcysteine decarboxylase being involved in Coenzyme A biosynthesis. HAL3A is predominant over another gene with the presumably same function (HAL3B).
BnaA01g27150D	0	0	0	4.16628	2.74226	1.41318	AT3G17910	Surfeit locus 1 cytochrome c oxidase biogenesis protein	Surfeit 1 (SURF1) mRNA. Similar to human SURF1 which is known to be involved in cytochrome c oxidase assembly.
BnaA01g27160D	0	0	0	1.17509	0.269993	0.042206	AT3G17900	unknown protein; FUNCTIONS IN: molecular_function unknown; INVOLVED IN: biological_process unknown; LOCATED IN: cellular_component unknown; EXPRESSED IN: 23 plant structures; EXPRESSED DURING: 13 growth stages; Has 45 Blast hits to 44 proteins in 14 species: Archae - 0; Bacteria - 0; Metazoa - 2; Fungi - 2; Plants - 39; Viruses - 0; Other Eukaryotes - 2 (source: NCBI BLink).	0
BnaA01g27690D	0	0	0	1.50244	1.84813	0.733507	AT3G16650	Transducin/WD40 repeat-like superfamily protein	Transducin/WD40 repeat-like superfamily protein; CONTAINS InterPro DOMAIN/s: WD40 repeat 2 (InterPro:IPR019782), WD40 repeat, conserved site (InterPro:IPR019775), WD40 repeat (InterPro:IPR001680), G-protein beta WD-40 repeat, region (InterPro:IPR020472), WD40 repeat-like-containing domain (InterPro:IPR011046), WD40-repeat-containing domain (InterPro:IPR017986), WD40/YVTN repeat-like-containing do…
BnaA01g28120D	37.9154	32.4955	18.1355	17.5249	5.21748	9.94241	AT3G16240	delta tonoplast integral protein	Delta tonoplast intrinsic protein, functions as a water channel and ammonium (NH3) transporter. Highly expressed in flower, shoot, and stem. Expression shows diurnal regulation and is induced by ammonium (NH3). Protein localized to vacuolar membrane.
BnaA01g28220D	4.33238	4.16452	4.7982	3.08444	1.79308	1.4822	AT3G16090	RING/U-box superfamily protein	Encodes one of the Arabidopsis homologs of the yeast/human Hrd1 protein: AT3G16090 (Hrd1A), AT1G65040 (Hrd1B). Involved in ERAD (Endoplasmic reticulum-associated degradation).
BnaA01g28510D	0.018083	0.0228743	0.095791	27.6968	23.7377	52.1014	AT3G15780	unknown protein; BEST Arabidopsis thaliana protein match is: unknown protein (TAIR:AT1G52550.1); Has 20 Blast hits to 20 proteins in 5 species: Archae - 0; Bacteria - 0; Metazoa - 0; Fungi - 0; Plants - 20; Viruses - 0; Other Eukaryotes - 0 (source: NCBI BLink).	0
BnaA01g28810D	0.0716787	0.091498	0.124057	0.936756	2.58797	4.97824	AT3G15356	Legume lectin family protein	Legume lectin family protein; FUNCTIONS IN: carbohydrate binding, binding; INVOLVED IN: defense response to fungus, incompatible interaction; LOCATED IN: apoplast, cell wall; EXPRESSED IN: 7 plant structures; CONTAINS InterPro DOMAIN/s: Legume lectin, beta chain (InterPro:IPR001220), Concanavalin A-like lectin/glucanase, subgroup (InterPro:IPR013320), Concanavalin A-like lectin/glucanase (InterPr…
BnaA01g29420D	70.4362	53.9392	64.6141	14.3054	3.30885	10.6881	AT3G14415	Aldolase-type TIM barrel family protein	Encodes a glycolate oxidase that modulates reactive oxygen species-mediated signal transduction during nonhost resistance.
BnaA01g29600D	12.1999	4.15191	3.46189	1.05268	1.01261	0.833323	AT3G14080	Small nuclear ribonucleoprotein family protein	Small nuclear ribonucleoprotein family protein; CONTAINS InterPro DOMAIN/s: Like-Sm ribonucleoprotein (LSM) domain (InterPro:IPR001163), Like-Sm ribonucleoprotein (LSM) domain, eukaryotic/archaea-type (InterPro:IPR006649), Like-Sm ribonucleoprotein (LSM)-related domain (InterPro:IPR010920); BEST Arabidopsis thaliana protein match is: Small nuclear ribonucleoprotein family protein (TAIR:AT1G19120.…
BnaA01g29630D	34.6388	50.0302	47.1852	0	0	0.00485233	AT3G14067	Subtilase family protein	Encodes a protein with similarity to serine protease, subtilisin, that is upregulated during senescence and expressed in the arial portions of the plant.Loss of function mutations have increased branch number but normal silique length and seed set and therefore have increased fertility.
BnaA01g29640D	3.39087	2.44591	11.4909	0	0	0	AT3G14060	unknown protein; BEST Arabidopsis thaliana protein match is: unknown protein (TAIR:AT1G54120.1); Has 30 Blast hits to 30 proteins in 8 species: Archae - 0; Bacteria - 0; Metazoa - 0; Fungi - 0; Plants - 30; Viruses - 0; Other Eukaryotes - 0 (source: NCBI BLink).	0
BnaA01g29650D	2.15197	0.82559	4.0595	0	0	0	AT3G14020	nuclear factor Y, subunit A6	nuclear factor Y, subunit A6 (NF-YA6); FUNCTIONS IN: sequence-specific DNA binding transcription factor activity; INVOLVED IN: regulation of transcription, DNA-dependent; LOCATED IN: CCAAT-binding factor complex, nucleus, chloroplast; EXPRESSED IN: 21 plant structures; EXPRESSED DURING: 13 growth stages; CONTAINS InterPro DOMAIN/s: CCAAT-binding transcription factor, subunit B (InterPro:IPR001289…
BnaA01g29850D	6.38011	6.0628	6.1158	5.72563	3.12348	3.38676	AT3G13360	WPP domain interacting protein 3	Encodes an outer nuclear membrane protein that anchors RanGAP1 to the nuclear envelope. It interacts with SUN proteins and is required for maintaining the elongated nuclear shape of epidermal cells.
BnaA01g31130D	1.94976	0.0927607	0.52955	11.9637	12.1066	9.96959	AT3G11200	alfin-like 2	Encodes a member of the Alfin1-like family of nuclear-localized PHD (plant homeodomain) domain containing proteins. All AL proteins except AL3 bind to di- or trimethylated histone H3 (H3K4me3/2). Members of this family include: AT5G05610 (AL1), AT3G11200 (AL2), AT3G42790 (AL3), AT5G26210 (AL4), AT5G20510 (AL5), AT2G02470 (AL6), AT1G14510 (AL7).
BnaA01g31290D	0.774073	0.0634727	0.092982	0.678965	0.363376	0.266453	AT3G11020	DRE/CRT-binding protein 2B	encodes a member of the DREB subfamily A-2 of ERF/AP2 transcription factor family (DREB2B). The protein contains one AP2 domain. There are eight members in this subfamily including DREB2A.
BnaA01g31500D	0.206504	0.217403	0.112715	4.0691	11.2844	3.36248	.	-	-
BnaA01g31520D	1.25242	1.07067	1.5496	2.9702	2.22748	2.26809	AT3G10650	Encodes a nucleoporin involved in mRNA export from the nucleus. It is also involved in the regulation of nuclear morphology.	BEST Arabidopsis thaliana protein match is: nucleoporin-related (TAIR:AT5G20200.1); Has 61042 Blast hits to 31782 proteins in 2093 species: Archae - 202; Bacteria - 16480; Metazoa - 16017; Fungi - 12552; Plants - 1653; Viruses - 629; Other Eukaryotes - 13509 (source: NCBI BLink).
BnaA01g31960D	0	0	0	4.27366	2.6859	5.05407	AT3G10160	DHFS-FPGS homolog C	Encodes a protein with tetrahydrofolylpolyglutamate synthase activity that is located in the mitochondrial matrix. One of the three folylpolyglutamate synthetase isoforms (FPGSs): FPGS1 (At5g05980, plastidic), FPGS2 (At3g10160, mitochondrial) and FPGS3 (At3g55630, cytosolic).
BnaA01g32050D	11.4263	21.8033	13.0443	137.446	96.869	70.5165	AT3G09820	adenosine kinase 1	Involved in the salvage synthesis of adenylates and methyl recycling
BnaA01g32170D	0.058309	0.0892577	0.0453783	0.0981143	0.12248	0.0155987	-	-	-
BnaA01g32280D	0.536112	0.743311	1.0547	1.71502	4.10143	1.13233	AT3G08760	Protein kinase superfamily protein	Encodes an osmotic stress-inducible kinase that functions as a negative regulator of osmotic stress signaling in plants.
BnaA01g32720D	0	0	0	13.1918	13.1311	7.48305	AT3G06610	DNA-binding enhancer protein-related	DNA-binding enhancer protein-related; Has 198 Blast hits to 198 proteins in 90 species: Archae - 0; Bacteria - 0; Metazoa - 126; Fungi - 17; Plants - 36; Viruses - 0; Other Eukaryotes - 19 (source: NCBI BLink).
BnaA01g34840D	0.043902	0.0142073	0	0.0328113	0.363342	6.30822	-	-	-
BnaA01g35050D	1.42633	0.670258	0.573528	0.325435	0.158729	0.060963	AT4G20270	Leucine-rich receptor-like protein kinase family protein	Encodes a CLAVATA1-related receptor kinase-like protein required for both shoot and flower meristem function. It has a broad expression pattern and is involved in vascular strand development in the leaf, control of leaf shape, size and symmetry, male gametophyte development and ovule specification and function.
BnaA01g35520D	0	0	0	1.04893	1.52435	1.23345	.	-	-
BnaA01g35710D	34.0583	40.6431	10.1148	9.02353	11.6836	2.14024	.	-	-
BnaA01g36110D	0	0.244276	0	39.2015	94.6342	1.67818	-	-	-
BnaA01g36200D	0.0474417	0.199977	0.0196027	7.98055	51.0244	17.3071	AT1G61720	NAD(P)-binding Rossmann-fold superfamily protein	Negative regulator of flavonoid biosynthesis, mutants accumulate flavonoid pigments in their seed coat, putative oxidoreductase. It is thought that a ternary complex composed of TT2, TT8 and TTG1 is necessary for correct expression of BAN in seed endothelium.
BnaA01g36380D	0	0	0	0.006562	0.11085	0.0766667	-	-	-
BnaA01g36880D	0.0182303	0	0	0.97107	2.02193	0.298031	AT3G18690	MAP kinase substrate 1	Encodes a nuclear-localized member of a plant specific gene family involved in mediating responses to pathogens. Interacts with WRKY transcriptional regulators.
BnaA01g36930D	0	0	0	0.121124	0.104014	0.0734347	AT3G17410	Protein kinase superfamily protein	Protein kinase superfamily protein; FUNCTIONS IN: protein serine/threonine kinase activity, protein kinase activity, kinase activity, ATP binding; INVOLVED IN: protein amino acid phosphorylation, N-terminal protein myristoylation; LOCATED IN: plasma membrane; EXPRESSED IN: 25 plant structures; EXPRESSED DURING: 15 growth stages; CONTAINS InterPro DOMAIN/s: Protein kinase, ATP binding site (InterP…
BnaA01g36960D	3.09877	3.21477	3.40633	11.4607	8.26095	5.61889	AT3G17430	Nucleotide-sugar transporter family protein	Nucleotide/sugar transporter family protein
BnaA01g37260D	0.380739	2.08156	0.296123	9.88985	28.4081	8.4306	.	-	-
BnaA02g01660D	8.28685	6.42589	6.62367	0.834309	0.531934	0.706239	AT5G13470	unknown protein; Has 1807 Blast hits to 1807 proteins in 277 species: Archae - 0; Bacteria - 0; Metazoa - 736; Fungi - 347; Plants - 385; Viruses - 0; Other Eukaryotes - 339 (source: NCBI BLink).	0
BnaA02g01830D	6.70706	3.85002	1.20672	1.50272	0.00970967	0.922518	AT5G13730	sigma factor 4	Encodes sigma 4 factor, involved in regulating the activity of the plastid-encoded RNA polymerase PEP. Regulates the overall quantity of NDH complexes and thus influences NDH activity.
BnaA02g02020D	161.698	82.2349	107.159	4.02887	0	0	AT5G14200	isopropylmalate dehydrogenase 1	The AtIMD1 is one out of 3 genes encoding the enzyme 3-isopropylmalate dehydrogenase involved in leucine biosynthesis in Arabidopsis. Its subcellular location has been targeted to plastids. Encodes methylthioalkylmalate dehydrogenase. Involved in glucosinolate biosynthesis, in methionine chain elongation.
BnaA02g02140D	0	0	0	5.4794	4.58062	2.68602	AT5G14390	alpha/beta-Hydrolases superfamily protein	alpha/beta-Hydrolases superfamily protein; FUNCTIONS IN: molecular_function unknown; INVOLVED IN: biological_process unknown; LOCATED IN: endomembrane system; EXPRESSED IN: 19 plant structures; EXPRESSED DURING: 11 growth stages; CONTAINS InterPro DOMAIN/s: Alpha/beta hydrolase fold-1 (InterPro:IPR000073); BEST Arabidopsis thaliana protein match is: alpha/beta-Hydrolases superfamily protein (TAIR…
BnaA02g03330D	0	0	0	0.423505	0.115689	0	AT5G16930	AAA-type ATPase family protein	AAA-type ATPase family protein; FUNCTIONS IN: nucleoside-triphosphatase activity, ATPase activity, nucleotide binding, ATP binding; LOCATED IN: endomembrane system; EXPRESSED IN: 16 plant structures; EXPRESSED DURING: 9 growth stages; CONTAINS InterPro DOMAIN/s: ATPase, AAA+ type, core (InterPro:IPR003593), ATPase, AAA-type, core (InterPro:IPR003959), Protein of unknown function DUF3523 (InterPro…
BnaA02g03440D	0	0.411359	0	3.74912	14.851	1.3207	AT5G17220	glutathione S-transferase phi 12	Encodes glutathione transferase belonging to the phi class of GSTs. Naming convention according to Wagner et al. (2002). Mutants display no pigments on leaves and stems. Likely to function as a carrier to transport anthocyanin from the cytosol to tonoplasts.
BnaA02g03520D	0	0	0.003173	1.77657	5.27009	0.494915	AT5G17320	homeodomain GLABROUS 9	Encodes a homeobox-leucine zipper family protein belonging to the HD-ZIP IV family.
BnaA02g03880D	0.0135377	0	0	3.68168	0.823658	1.13827	.	-	-
BnaA02g04330D	0	0.0252353	0.0267257	1.42735	1.28185	1.067	AT5G19580	glyoxal oxidase-related protein	glyoxal oxidase-related protein; FUNCTIONS IN: molecular_function unknown; INVOLVED IN: biological_process unknown; LOCATED IN: endomembrane system; EXPRESSED IN: 10 plant structures; EXPRESSED DURING: L mature pollen stage, M germinated pollen stage, 4 anthesis, C globular stage, petal differentiation and expansion stage; CONTAINS InterPro DOMAIN/s: Galactose oxidase/kelch, beta-propeller (Inter…
BnaA02g04440D	0	0.0784933	0.0663283	1.61927	3.29036	1.83959	AT5G19730	Pectin lyase-like superfamily protein	Pectin lyase-like superfamily protein; FUNCTIONS IN: pectinesterase activity; INVOLVED IN: cell wall modification; LOCATED IN: cell wall, plant-type cell wall, cytoplasm; EXPRESSED IN: 17 plant structures; EXPRESSED DURING: 8 growth stages; CONTAINS InterPro DOMAIN/s: Pectinesterase, active site (InterPro:IPR018040), Pectin lyase fold/virulence factor (InterPro:IPR011050), Pectinesterase, catalyt…
BnaA02g04690D	108.904	124.766	128.581	25.8288	35.0895	29.4713	AT5G20090	Uncharacterised protein family (UPF0041)	Uncharacterised protein family (UPF0041); INVOLVED IN: biological_process unknown; LOCATED IN: mitochondrion, plasma membrane, membrane; EXPRESSED IN: 26 plant structures; EXPRESSED DURING: 16 growth stages; CONTAINS InterPro DOMAIN/s: Uncharacterised protein family UPF0041 (InterPro:IPR005336); BEST Arabidopsis thaliana protein match is: Uncharacterised protein family (UPF0041) (TAIR:AT4G14695.1…
BnaA02g04710D	9.21767	9.85007	7.72909	0	0	0	AT5G20120	unknown protein; Has 54 Blast hits to 54 proteins in 26 species: Archae - 0; Bacteria - 0; Metazoa - 18; Fungi - 0; Plants - 18; Viruses - 0; Other Eukaryotes - 18 (source: NCBI BLink).	0
BnaA02g04970D	0.040941	0	0.017058	0.952301	1.34204	0.365387	.	-	-
BnaA02g04990D	14.2251	18.7425	34.4339	0.133882	0.0395773	0.116615	.	-	-
BnaA02g05110D	0.0156117	0.78784	0.00993167	7.24242	5.85359	4.62942	AT5G20890	TCP-1/cpn60 chaperonin family protein	TCP-1/cpn60 chaperonin family protein; FUNCTIONS IN: unfolded protein binding, ATP binding; INVOLVED IN: protein folding, cellular protein metabolic process; LOCATED IN: anchored to plasma membrane, cell wall; EXPRESSED IN: 24 plant structures; EXPRESSED DURING: 14 growth stages; CONTAINS InterPro DOMAIN/s: Chaperonin Cpn60/TCP-1 (InterPro:IPR002423), Chaperone, tailless complex polypeptide 1 (In…
BnaA02g05120D	16.0779	12.9684	14.0082	8.24686	6.2992	5.00473	AT5G20900	jasmonate-zim-domain protein 12	jasmonate-zim-domain protein 12 (JAZ12); FUNCTIONS IN: protein binding; INVOLVED IN: biological_process unknown; LOCATED IN: cellular_component unknown; EXPRESSED IN: 25 plant structures; EXPRESSED DURING: 13 growth stages; CONTAINS InterPro DOMAIN/s: Tify (InterPro:IPR010399), CCT domain-like (InterPro:IPR018467); BEST Arabidopsis thaliana protein match is: jasmonate-zim-domain protein 11 (TAIR:…
BnaA02g05130D	14.3484	20.8439	19.7583	34.1825	33.1951	31.3731	AT5G20920	eukaryotic translation initiation factor 2 beta subunit	protein synthesis initiation factor eIF2 beta
BnaA02g05150D	6.19278	4.60809	4.91818	0	0	0	AT5G20935	unknown protein; CONTAINS InterPro DOMAIN/s: Protein of unknown function DUF3148 (InterPro:IPR021495); Has 30201 Blast hits to 17322 proteins in 780 species: Archae - 12; Bacteria - 1396; Metazoa - 17338; Fungi - 3422; Plants - 5037; Viruses - 0; Other Eukaryotes - 2996 (source: NCBI BLink).	0
BnaA02g05290D	0.0130763	0.007166	0.001826	0.007883	0.020871	0.00492433	AT5G21150	Argonaute family protein	AGO9-dependent sRNA silencing is crucial to specify cell fate in the Arabidopsis ovule. AGO9 is expressed in reproductive companion cells but not in the associated male or female gametes or their precursors. Therefore, AGO9 acts non-cell autonomously to silencing the activity of TEs activity in the female gametophyte.Loss of function mutants produce ectopic megaspore mother cell and supernumary f…
BnaA02g05460D	0	0	0	0.368217	0.534293	0.318748	.	-	-
BnaA02g05510D	0.0157117	0.00506233	0.00261433	6.78933	12.998	2.74609	AT5G22250	Polynucleotidyl transferase, ribonuclease H-like superfamily protein	Encodes one of the homologs of the yeast CCR4-associated factor 1: AT3G44260 (CAF1a), AT5G22250 (CAF1b). Has mRNA deadenylation activity. Also plays a role in plant defense responses.
BnaA02g05520D	0	0	0	1.82949	0.885608	0.533066	AT5G22270	unknown protein; BEST Arabidopsis thaliana protein match is: unknown protein (TAIR:AT3G11600.1); Has 136 Blast hits to 136 proteins in 15 species: Archae - 0; Bacteria - 0; Metazoa - 0; Fungi - 0; Plants - 136; Viruses - 0; Other Eukaryotes - 0 (source: NCBI BLink).	0
BnaA02g05530D	0	0	0	14.2637	11.8883	8.16009	AT5G22280	unknown protein; FUNCTIONS IN: molecular_function unknown; INVOLVED IN: biological_process unknown; LOCATED IN: endomembrane system; EXPRESSED IN: 22 plant structures; EXPRESSED DURING: 13 growth stages; BEST Arabidopsis thaliana protein match is: unknown protein (TAIR:AT3G44280.1); Has 82 Blast hits to 82 proteins in 13 species: Archae - 0; Bacteria - 0; Metazoa - 0; Fungi - 0; Plants - 82; Viru…	0
BnaA02g05540D	0	0	0	1.79509	1.81385	5.21651	AT5G22290	NAC domain containing protein 89	Encodes ANAC089, a membrane-tethered transcription factor that negatively regulates floral initiation. Also controls ER-stress-induced programmed cell death.
BnaA02g05650D	101.855	114.014	15.3574	0	0	0	AT5G22430	Pollen Ole e 1 allergen and extensin family protein	Pollen Ole e 1 allergen and extensin family protein; CONTAINS InterPro DOMAIN/s: Pollen Ole e 1 allergen/extensin (InterPro:IPR006041); BEST Arabidopsis thaliana protein match is: Pollen Ole e 1 allergen and extensin family protein (TAIR:AT2G27385.3); Has 30201 Blast hits to 17322 proteins in 780 species: Archae - 12; Bacteria - 1396; Metazoa - 17338; Fungi - 3422; Plants - 5037; Viruses - 0; Oth…
BnaA02g05770D	0.101202	0.0721813	0.107605	3.3137	0.823424	3.35677	AT5G22620	phosphoglycerate/bisphosphoglycerate mutase family protein	encodes a putative 2-carboxy-D-arabinitol 1-phosphate phosphatase
BnaA02g05820D	2.66863	1.93979	1.80026	0	0.0100547	0.008422	.	-	-
BnaA02g06420D	11.8607	15.382	3.54597	3.59924	5.90156	0	AT5G60360	aleurain-like protease	Encodes a senescence-associated thiol protease.
BnaA02g06850D	0.0537493	0.0345697	3.33333e-07	0.705338	0.829074	0.110189	-	-	-
BnaA02g07110D	15.2144	377.488	14.8639	332.365	20.0406	9.73758	AT5G59330	Bifunctional inhibitor/lipid-transfer protein/seed storage 2S albumin superfamily protein	Bifunctional inhibitor/lipid-transfer protein/seed storage 2S albumin superfamily protein; FUNCTIONS IN: lipid binding; INVOLVED IN: lipid transport; LOCATED IN: endomembrane system; EXPRESSED IN: shoot apex, shoot, embryo, sepal, leaf; EXPRESSED DURING: 4 anthesis, C globular stage; CONTAINS InterPro DOMAIN/s: Bifunctional inhibitor/plant lipid transfer protein/seed storage (InterPro:IPR016140),…
BnaA02g07410D	0.0189487	0.546529	0.27036	12.3061	12.3313	2.31311	.	-	-
BnaA02g07530D	0.118965	0	0	0.494575	0.518216	0.203586	AT5G58700	phosphatidylinositol-speciwc phospholipase C4	phosphatidylinositol-speciwc phospholipase C4 (PLC4); FUNCTIONS IN: phospholipase C activity, phosphoinositide phospholipase C activity, phosphoric diester hydrolase activity; INVOLVED IN: signal transduction, intracellular signaling pathway, lipid metabolic process; LOCATED IN: plasma membrane; EXPRESSED IN: 22 plant structures; EXPRESSED DURING: 15 growth stages; CONTAINS InterPro DOMAIN/s: Pho…
BnaA02g07590D	0.183391	2.23343	0.076369	12.7676	28.0737	2.93411	AT5G58500	Protein of unknown function (DUF640)	LIGHT SENSITIVE HYPOCOTYLS 5 (LSH5); CONTAINS InterPro DOMAIN/s: Protein of unknown function DUF640 (InterPro:IPR006936); BEST Arabidopsis thaliana protein match is: Protein of unknown function (DUF640) (TAIR:AT1G07090.1); Has 1807 Blast hits to 1807 proteins in 277 species: Archae - 0; Bacteria - 0; Metazoa - 736; Fungi - 347; Plants - 385; Viruses - 0; Other Eukaryotes - 339 (source: NCBI BLink…
BnaA02g08790D	13.2688	16.8734	22.2379	3.09418	6.22611	21.3303	AT5G56260	Ribonuclease E inhibitor RraA/Dimethylmenaquinone methyltransferase	Ribonuclease E inhibitor RraA/Dimethylmenaquinone methyltransferase; FUNCTIONS IN: ribonuclease inhibitor activity; INVOLVED IN: regulation of RNA metabolic process; LOCATED IN: cellular_component unknown; EXPRESSED IN: 23 plant structures; EXPRESSED DURING: 13 growth stages; CONTAINS InterPro DOMAIN/s: Ribonuclease E inhibitor RraA/Dimethylmenaquinone methyltransferase (InterPro:IPR005493), Ribo…
BnaA02g08860D	0	0	0	0.666006	0.819731	1.02541	AT5G55750	hydroxyproline-rich glycoprotein family protein	hydroxyproline-rich glycoprotein family protein; Has 1807 Blast hits to 1807 proteins in 277 species: Archae - 0; Bacteria - 0; Metazoa - 736; Fungi - 347; Plants - 385; Viruses - 0; Other Eukaryotes - 339 (source: NCBI BLink).
BnaA02g09700D	0.88194	0.16358	0.238503	0	0	0	AT5G54270	light-harvesting chlorophyll B-binding protein 3	Lhcb3 protein is a component of the main light harvesting chlorophyll a/b-protein complex of Photosystem II (LHC II).
BnaA02g10320D	14.4694	19.3254	17.4413	46.1358	52.2115	36.6859	AT5G53310	myosin heavy chain-related	myosin heavy chain-related; FUNCTIONS IN: motor activity; INVOLVED IN: biological_process unknown; LOCATED IN: plasma membrane; EXPRESSED IN: 25 plant structures; EXPRESSED DURING: 15 growth stages; CONTAINS InterPro DOMAIN/s: Myosin tail 2 (InterPro:IPR010926); Has 30201 Blast hits to 17322 proteins in 780 species: Archae - 12; Bacteria - 1396; Metazoa - 17338; Fungi - 3422; Plants - 5037; Virus…
BnaA02g10490D	4.37079	2.33598	2.51102	9.65903	9.13807	6.23605	AT5G53070	Ribosomal protein L9/RNase H1	Ribosomal protein L9/RNase H1; FUNCTIONS IN: structural constituent of ribosome; INVOLVED IN: translation, ribosome biogenesis; LOCATED IN: ribosome, intracellular; EXPRESSED IN: 19 plant structures; EXPRESSED DURING: 13 growth stages; CONTAINS InterPro DOMAIN/s: Ribosomal protein L9 (InterPro:IPR000244), Ribosomal protein L9/RNase H1, N-terminal (InterPro:IPR009027), Ribosomal protein L9, N-term…
BnaA02g11720D	3.14773	3.33053	4.05741	22.2785	19.1388	24.3623	AT5G50410	unknown protein; Has 1807 Blast hits to 1807 proteins in 277 species: Archae - 0; Bacteria - 0; Metazoa - 736; Fungi - 347; Plants - 385; Viruses - 0; Other Eukaryotes - 339 (source: NCBI BLink).	0
BnaA02g13620D	0.0449057	0.0229227	0.039694	0.000509667	0.00764767	0	.	-	-
BnaA02g13880D	0.202436	0.444421	0.141841	0	0	0	.	-	-
BnaA02g14210D	0.68429	0.467268	0.374867	0.13516	0.144103	0.0599383	AT1G68980	Tetratricopeptide repeat (TPR)-like superfamily protein	Tetratricopeptide repeat (TPR)-like superfamily protein; CONTAINS InterPro DOMAIN/s: Pentatricopeptide repeat (InterPro:IPR002885); BEST Arabidopsis thaliana protein match is: Pentatricopeptide repeat (PPR) superfamily protein (TAIR:AT1G69290.1); Has 15528 Blast hits to 6193 proteins in 167 species: Archae - 0; Bacteria - 0; Metazoa - 21; Fungi - 63; Plants - 15194; Viruses - 0; Other Eukaryotes …
BnaA02g14450D	114.12	92.61	58.3264	64.6247	62.5326	32.7062	AT1G69620	ribosomal protein L34	putative 60S ribosomal protein L34
BnaA02g14580D	0.578563	0.422958	0.436648	1.20516	1.14467	1.36412	AT1G69170	Squamosa promoter-binding protein-like (SBP domain) transcription factor family protein	Encodes SPL6. Required for the resistance mediated by the TIR-NB-LRR RPS4 against Pseudomonas syringae carrying the avrRps4 effector. Transcriptome analysis indicates that SPL6 positively regulates a subset of defense genes.
BnaA02g14910D	1.34376	1.13262	1.47146	0.062264	0.150654	0.0993543	.	-	-
BnaA02g15440D	0	0.0300803	0	3.61073	4.93744	3.46022	AT1G71430	unknown protein; FUNCTIONS IN: molecular_function unknown; INVOLVED IN: biological_process unknown; LOCATED IN: cellular_component unknown; EXPRESSED IN: 23 plant structures; EXPRESSED DURING: 13 growth stages; Has 64 Blast hits to 64 proteins in 28 species: Archae - 0; Bacteria - 0; Metazoa - 14; Fungi - 6; Plants - 42; Viruses - 0; Other Eukaryotes - 2 (source: NCBI BLink).	0
BnaA02g15970D	0	0	0.00145067	1.05627	0.362252	0.547056	AT1G72390	CONTAINS InterPro DOMAIN/s: Spt20 family (InterPro:IPR021950); Has 8778 Blast hits to 7244 proteins in 477 species: Archae - 6; Bacteria - 326; Metazoa - 4198; Fungi - 1506; Plants - 923; Viruses - 22; Other Eukaryotes - 1797 (source: NCBI BLink).	0
BnaA02g17120D	0.840641	1.29741	0.837808	4.58786	10.3836	6.90406	-	-	-
BnaA02g17260D	0.0256583	0.00809267	0.00128167	0	0	0	AT1G75500	Walls Are Thin 1	An Arabidopsis thaliana homolog of Medicago truncatula NODULIN21 (MtN21). The gene encodes a plant-specific, predicted integral membrane protein and is a member of the Plant-Drug/Metabolite Exporter (P-DME) family (Transporter Classification number: TC 2.A.7.3) and the nodulin MtN21-like transporter family.
BnaA02g17480D	36.3709	36.7471	70.0797	10.316	18.6504	26.5228	AT1G75800	Pathogenesis-related thaumatin superfamily protein	Pathogenesis-related thaumatin superfamily protein; FUNCTIONS IN: molecular_function unknown; INVOLVED IN: response to other organism; LOCATED IN: endomembrane system; EXPRESSED IN: 22 plant structures; EXPRESSED DURING: 13 growth stages; CONTAINS InterPro DOMAIN/s: Thaumatin, conserved site (InterPro:IPR017949), Thaumatin, pathogenesis-related (InterPro:IPR001938); BEST Arabidopsis thaliana prot…
BnaA02g17560D	0.0808657	0	0	0	0.0108617	0	AT1G75850	VPS35 homolog B	VPS35 homolog B (VPS35B); CONTAINS InterPro DOMAIN/s: Vacuolar protein sorting-associated protein 35 (InterPro:IPR005378); BEST Arabidopsis thaliana protein match is: VPS35 homolog A (TAIR:AT2G17790.1); Has 618 Blast hits to 508 proteins in 209 species: Archae - 0; Bacteria - 1; Metazoa - 191; Fungi - 219; Plants - 72; Viruses - 0; Other Eukaryotes - 135 (source: NCBI BLink).
BnaA02g17610D	0.0304693	0.163232	0.444509	0.0135393	0.020643	0.073152	-	-	-
BnaA02g17740D	1.88165	0.83358	2.02187	0.20436	0.208788	0.628145	AT1G76850	exocyst complex component sec5	Encodes a member of the exocyst complex gene family. The exocyst is a protein complex involved in tethering vesicles to the plasma membrane during regulated or polarized secretion.
BnaA02g17760D	0.015416	0.029129	0.00488	0	0	0	-	-	-
BnaA02g17890D	0.811371	0.423042	0.687506	0.602726	0.313321	0.154356	-	-	-
BnaA02g18010D	0.298163	0.536762	0.556057	0.413214	1.41446	2.0929	.	-	-
BnaA02g18060D	0.00786333	0.00246933	0.0165647	0.0621897	0.140195	0.00684033	.	-	-
BnaA02g18240D	2.48328	1.96947	1.63861	12.1493	21.0605	7.2553	AT1G77660	Histone H3 K4-specific methyltransferase SET7/9 family protein	Histone H3 K4-specific methyltransferase SET7/9 family protein; CONTAINS InterPro DOMAIN/s: MORN motif (InterPro:IPR003409); BEST Arabidopsis thaliana protein match is: Histone H3 K4-specific methyltransferase SET7/9 family protein (TAIR:AT1G21920.1); Has 25589 Blast hits to 6526 proteins in 562 species: Archae - 0; Bacteria - 3550; Metazoa - 4135; Fungi - 204; Plants - 2355; Viruses - 0; Other E…
BnaA02g18370D	0	0.0487203	0.009424	29.4957	35.8137	5.44729	AT1G77510	PDI-like 1-2	Encodes a protein disulfide isomerase-like (PDIL) protein, a member of a multigene family within the thioredoxin (TRX) superfamily. Transcript levels for this gene are up-regulated in response to three different chemical inducers of ER stress (dithiothreitol, beta-mercaptoethanol, and tunicamycin). AtIRE1-2 does not appear to be required for this response, but the atbzip60 mutant has a diminished…
BnaA02g18480D	0.154666	0.212976	0.0915847	0.0122957	0.248678	0.389307	AT1G77280	Protein kinase protein with adenine nucleotide alpha hydrolases-like domain	Protein kinase protein with adenine nucleotide alpha hydrolases-like domain; FUNCTIONS IN: protein serine/threonine kinase activity, protein kinase activity, kinase activity, ATP binding; INVOLVED IN: protein amino acid phosphorylation, response to stress; LOCATED IN: cellular_component unknown; EXPRESSED IN: 16 plant structures; EXPRESSED DURING: 6 growth stages; CONTAINS InterPro DOMAIN/s: UspA…
BnaA02g19120D	0.242753	0.70414	0.571533	0	0	0	-	-	-
BnaA02g19520D	5.02904	4.74835	5.31536	4.2974	6.5613	4.82023	AT1G80620	S15/NS1, RNA-binding protein	S15/NS1, RNA-binding protein; FUNCTIONS IN: structural constituent of ribosome; INVOLVED IN: translation; LOCATED IN: small ribosomal subunit, ribosome, intracellular, chloroplast; EXPRESSED IN: 22 plant structures; EXPRESSED DURING: 13 growth stages; CONTAINS InterPro DOMAIN/s: Ribosomal protein S15 (InterPro:IPR000589), Ribosomal protein S15, bacterial-type (InterPro:IPR005290), S15/NS1, RNA-bi…
BnaA02g19820D	0	0.427278	0	0.374054	7.21419	4.35535	AT1G80330	gibberellin 3-oxidase 4	Encodes a protein with gibberellin 3-oxidase activity. The enzyme, expressed and purified in E.coli, was shown to catalyze the 3&#946;-hydroxylation of GA20 into GA29.
BnaA02g20130D	0	0	0	0.369032	1.38382	0.432948	-	-	-
BnaA02g25070D	2.37107	1.45548	1.38499	0.577579	0.471195	0.617519	AT5G47180	Plant VAMP (vesicle-associated membrane protein) family protein	Plant VAMP (vesicle-associated membrane protein) family protein; FUNCTIONS IN: structural molecule activity; LOCATED IN: plasma membrane; EXPRESSED IN: 24 plant structures; EXPRESSED DURING: 15 growth stages; CONTAINS InterPro DOMAIN/s: PapD-like (InterPro:IPR008962), Major sperm protein (InterPro:IPR000535), Vesicle-associated membrane protein (InterPro:IPR016763); BEST Arabidopsis thaliana prot…
BnaA02g26690D	0.406721	0.245554	0.311127	0	0.025756	0	AT2G03150	ATP/GTP-binding protein family	Encodes a nuclear-localized calcium-binding protein RSA1 (SHORT ROOT IN SALT MEDIUM 1), which is required for salt tolerance.
BnaA02g26700D	0.748347	0.628305	0.458472	0	0.111155	0	-	-	-
BnaA02g26760D	0	0.053408	0	1.69174	2.09261	0.811289	AT2G03290	emp24/gp25L/p24 family/GOLD family protein	emp24/gp25L/p24 family/GOLD family protein; FUNCTIONS IN: protein transmembrane transporter activity; INVOLVED IN: intracellular protein transport, transport; LOCATED IN: endomembrane system, integral to membrane, membrane; CONTAINS InterPro DOMAIN/s: GOLD (InterPro:IPR009038), emp24/gp25L/p24 (InterPro:IPR000348); BEST Arabidopsis thaliana protein match is: emp24/gp25L/p24 family/GOLD family pro…
BnaA02g27340D	25.4164	17.8697	17.8478	2.15561	1.52068	1.84687	.	-	-
BnaA02g28350D	0	0	0	0.342971	0.0764937	0.194486	.	-	-
BnaA02g29010D	10.1834	10.6119	22.7764	67.1331	49.0956	257.582	AT3G27690	photosystem II light harvesting complex gene 2.3	Encodes Lhcb2.4. Belongs to the Lhc super-gene family encodes the light-harvesting chlorophyll a/b-binding (LHC) proteins that constitute the antenna system of the photosynthetic apparatus.
BnaA02g29390D	19.3331	40.9889	55.8306	0.400911	0.108362	1.29867	.	-	-
BnaA02g30110D	0.139127	0.004491	0.194676	0.357343	0.378472	0.273602	AT5G48385	FRIGIDA-like protein	FRIGIDA-like protein; CONTAINS InterPro DOMAIN/s: Frigida-like (InterPro:IPR012474); BEST Arabidopsis thaliana protein match is: FRIGIDA-like protein (TAIR:AT4G14900.1); Has 1269 Blast hits to 1187 proteins in 101 species: Archae - 0; Bacteria - 22; Metazoa - 72; Fungi - 9; Plants - 1133; Viruses - 0; Other Eukaryotes - 33 (source: NCBI BLink).
BnaA02g30330D	15.8238	9.42257	14.6226	0	0	0	-	-	-
BnaA02g31260D	4.43023	2.64625	2.83021	0.517541	0.763252	0.617815	AT5G27700	Ribosomal protein S21e	Ribosomal protein S21e ; FUNCTIONS IN: structural constituent of ribosome; INVOLVED IN: translation, ribosome biogenesis; LOCATED IN: cytosolic small ribosomal subunit, ribosome; EXPRESSED IN: 24 plant structures; EXPRESSED DURING: 13 growth stages; CONTAINS InterPro DOMAIN/s: Ribosomal protein S21e, conserved site (InterPro:IPR018279), Ribosomal protein S21e (InterPro:IPR001931); BEST Arabidopsi…
BnaA02g31630D	0	0.265794	0	0.0133947	0	0.0578863	AT5G26667	P-loop containing nucleoside triphosphate hydrolases superfamily protein	encodes a uridine 5'-monophosphate (UMP)/cytidine 5'-monophosphate (CMP) kinase.
BnaA02g31710D	5.66158	6.40885	4.9398	11.7174	19.0763	13.276	AT5G26710	Glutamyl/glutaminyl-tRNA synthetase, class Ic	Glutamyl/glutaminyl-tRNA synthetase, class Ic; FUNCTIONS IN: glutamate-tRNA ligase activity; INVOLVED IN: glutamyl-tRNA aminoacylation, translation, tRNA aminoacylation, tRNA aminoacylation for protein translation; LOCATED IN: cytoplasm; EXPRESSED IN: 24 plant structures; EXPRESSED DURING: 13 growth stages; CONTAINS InterPro DOMAIN/s: Aminoacyl-tRNA synthetase, class I, conserved site (InterPro:I…
BnaA02g32260D	0	0.037809	0	2.75244	2.62836	1.35527	-	-	-
BnaA02g32370D	2.21521	1.32983	1.23117	2.11952	2.13345	1.10413	AT5G24750	UDP-Glycosyltransferase superfamily protein	UDP-Glycosyltransferase superfamily protein; FUNCTIONS IN: transferase activity, transferring hexosyl groups; INVOLVED IN: metabolic process; LOCATED IN: cellular_component unknown; EXPRESSED IN: 9 plant structures; EXPRESSED DURING: 6 growth stages; CONTAINS InterPro DOMAIN/s: UDP-glucuronosyl/UDP-glucosyltransferase (InterPro:IPR002213); BEST Arabidopsis thaliana protein match is: UDP-Glycosylt…
BnaA02g32400D	0.0616633	0.0228873	0.122344	0.242766	0.962101	0.224793	AT5G24620	Pathogenesis-related thaumatin superfamily protein	Pathogenesis-related thaumatin superfamily protein; INVOLVED IN: response to other organism; LOCATED IN: endomembrane system; EXPRESSED IN: 22 plant structures; EXPRESSED DURING: 13 growth stages; CONTAINS InterPro DOMAIN/s: Thaumatin, conserved site (InterPro:IPR017949), Thaumatin, pathogenesis-related (InterPro:IPR001938); BEST Arabidopsis thaliana protein match is: Pathogenesis-related thaumat…
BnaA02g32440D	0.376834	1.68632	1.04417	6.65235	7.9003	4.34294	AT5G24580	Heavy metal transport/detoxification superfamily protein	Heavy metal transport/detoxification superfamily protein ; FUNCTIONS IN: copper ion binding, metal ion binding; INVOLVED IN: copper ion transport, metal ion transport; LOCATED IN: cellular_component unknown; EXPRESSED IN: 20 plant structures; EXPRESSED DURING: 13 growth stages; CONTAINS InterPro DOMAIN/s: Heavy metal transport/detoxification protein (InterPro:IPR006121); BEST Arabidopsis thaliana…
BnaA02g32580D	0.485659	0.441403	0.251686	0	0.00944967	0.0157627	.	-	-
BnaA02g32860D	0.00968167	0.00957733	0.0212687	0	0	0	AT5G23480	SWIB/MDM2 domain;Plus-3;GYF	SWIB/MDM2 domain;Plus-3;GYF; FUNCTIONS IN: DNA binding; INVOLVED IN: histone modification, transcription initiation; LOCATED IN: nucleus; EXPRESSED IN: 12 plant structures; EXPRESSED DURING: 6 growth stages; CONTAINS InterPro DOMAIN/s: Plus-3 domain, subgroup (InterPro:IPR018144), SWIB/MDM2 domain (InterPro:IPR003121), Plus-3 (InterPro:IPR004343), GYF (InterPro:IPR003169); BEST Arabidopsis thalia…
BnaA02g32900D	0.0243777	0.101705	0.116063	0.815325	0.952552	1.46525	AT5G23370	GRAM domain-containing protein / ABA-responsive protein-related	GRAM domain-containing protein / ABA-responsive protein-related; CONTAINS InterPro DOMAIN/s: GRAM (InterPro:IPR004182); BEST Arabidopsis thaliana protein match is: GRAM domain-containing protein / ABA-responsive protein-related (TAIR:AT5G23350.1); Has 1807 Blast hits to 1807 proteins in 277 species: Archae - 0; Bacteria - 0; Metazoa - 736; Fungi - 347; Plants - 385; Viruses - 0; Other Eukaryotes …
BnaA02g33090D	0.237426	0.231107	0.229904	3.90539	5.98688	5.9399	AT5G61960	MEI2-like protein 1	A member of mei2-like gene family, predominantly plant-based family of genes encoding RNA binding proteins with characteristic presence of a highly conserved RNA binding motif first described in the mei2 gene of the fission yeast S. pombe. In silico analyses reveal nine mei2 -like genes in A. thaliana. They were grouped into four distinct clades, based on overall sequence similarity and subfamily…
BnaA02g33600D	7.8871	6.89068	7.83624	0.889847	0.903553	0.793807	AT5G62880	RAC-like 10	A member of ROP GTPase gene family.
BnaA02g33680D	12.1331	12.8394	12.8507	0	0	0	AT5G63280	C2H2-like zinc finger protein	C2H2-like zinc finger protein; FUNCTIONS IN: zinc ion binding, nucleic acid binding; INVOLVED IN: biological_process unknown; LOCATED IN: endomembrane system, intracellular; EXPRESSED IN: 22 plant structures; EXPRESSED DURING: 13 growth stages; CONTAINS InterPro DOMAIN/s: Zinc finger, C2H2-like (InterPro:IPR015880), Zinc finger, C2H2-type (InterPro:IPR007087); BEST Arabidopsis thaliana protein ma…
BnaA02g33750D	0	0	0	0.0101413	0.0354353	0.0140347	-	-	-
BnaA02g33830D	0	0	0	0.032469	0.0341847	0.018511	AT5G63640	ENTH/VHS/GAT family protein	ENTH/VHS/GAT family protein; FUNCTIONS IN: protein transporter activity; INVOLVED IN: intracellular protein transport, intra-Golgi vesicle-mediated transport; LOCATED IN: Golgi stack, plasma membrane; EXPRESSED IN: 23 plant structures; EXPRESSED DURING: 13 growth stages; CONTAINS InterPro DOMAIN/s: VHS (InterPro:IPR002014), GAT (InterPro:IPR004152), ENTH/VHS (InterPro:IPR008942); BEST Arabidopsis…
BnaA02g34020D	8.12236	11.05	10.6313	15.7236	21.464	15.0936	AT5G64030	S-adenosyl-L-methionine-dependent methyltransferases superfamily protein	S-adenosyl-L-methionine-dependent methyltransferases superfamily protein; CONTAINS InterPro DOMAIN/s: Protein of unknown function DUF248, methyltransferase putative (InterPro:IPR004159); BEST Arabidopsis thaliana protein match is: S-adenosyl-L-methionine-dependent methyltransferases superfamily protein (TAIR:AT1G29470.2); Has 79879 Blast hits to 39720 proteins in 2025 species: Archae - 377; Bacte…
BnaA02g35100D	0	0.094982	0.0738763	1.13534	1.90666	0.743501	AT5G18550	Zinc finger C-x8-C-x5-C-x3-H type family protein	Zinc finger C-x8-C-x5-C-x3-H type family protein; FUNCTIONS IN: zinc ion binding, nucleic acid binding; INVOLVED IN: biological_process unknown; LOCATED IN: cellular_component unknown; EXPRESSED IN: 17 plant structures; EXPRESSED DURING: 8 growth stages; CONTAINS InterPro DOMAIN/s: Zinc finger, CCCH-type (InterPro:IPR000571); BEST Arabidopsis thaliana protein match is: Zinc finger C-x8-C-x5-C-x3-…
BnaA02g35130D	0	0.220649	0.034144	2.56036	1.82312	0.709628	AT5G18500	Protein kinase superfamily protein	Protein kinase superfamily protein; FUNCTIONS IN: protein serine/threonine kinase activity, protein kinase activity, kinase activity, ATP binding; INVOLVED IN: protein amino acid phosphorylation; LOCATED IN: plasma membrane; EXPRESSED IN: 22 plant structures; EXPRESSED DURING: 13 growth stages; CONTAINS InterPro DOMAIN/s: Protein kinase, ATP binding site (InterPro:IPR017441), Protein kinase, cata…
BnaA02g35170D	0	0.164744	0.0289233	1.98642	1.48591	0.31143	AT5G18460	Protein of Unknown Function (DUF239)	Protein of Unknown Function (DUF239); INVOLVED IN: biological_process unknown; LOCATED IN: endomembrane system; EXPRESSED IN: 22 plant structures; EXPRESSED DURING: 12 growth stages; CONTAINS InterPro DOMAIN/s: Protein of unknown function DUF239, plant (InterPro:IPR004314); BEST Arabidopsis thaliana protein match is: Protein of Unknown Function (DUF239) (TAIR:AT1G23340.2); Has 1807 Blast hits to …
BnaA02g36020D	0.118978	0.114647	0.0387123	0.883005	1.42453	0.700954	AT1G75380	bifunctional nuclease in basal defense response 1	Encodes a nuclease involved in ABA-mediated callose deposition. It has been shown to interact with JAZ proteins, binds to a jasmonic acid-responsive element (JARE) and repress AtJMT expression.
BnaA02g36290D	4.54182	5.98617	16.0895	0.36033	0.448337	2.82302	-	-	-
BnaA02g36500D	2.98915	6.38242	6.96627	0.0631123	0.206114	0.396762	-	-	-
BnaA02g36660D	2.98065	2.64887	2.9134	0.055129	0.02145	0.0209167	.	-	-
BnaA02g36940D	0.0202267	0	0.003236	0	0	0	AT2G03440	nodulin-related protein 1	Induced at the transcriptional level by Pseudomonas syringae pv. tomato infection.
BnaA03g00730D	0.0133177	0.0434617	0.0400293	0.126367	0.0404197	0.021246	AT5G03030	Chaperone DnaJ-domain superfamily protein	Chaperone DnaJ-domain superfamily protein; FUNCTIONS IN: heat shock protein binding; INVOLVED IN: protein folding; EXPRESSED IN: 24 plant structures; EXPRESSED DURING: 15 growth stages; CONTAINS InterPro DOMAIN/s: Heat shock protein DnaJ, N-terminal (InterPro:IPR001623); BEST Arabidopsis thaliana protein match is: Chaperone DnaJ-domain superfamily protein (TAIR:AT2G35795.1); Has 904 Blast hits to…
BnaA03g00940D	2.49328	0.17964	0.160794	0.0439017	0.0425457	0.0267747	AT5G03560	Tetratricopeptide repeat (TPR)-like superfamily protein	Tetratricopeptide repeat (TPR)-like superfamily protein; CONTAINS InterPro DOMAIN/s: DnaJ homologue, subfamily C, member 28, conserved domain (InterPro:IPR018961); Has 30201 Blast hits to 17322 proteins in 780 species: Archae - 12; Bacteria - 1396; Metazoa - 17338; Fungi - 3422; Plants - 5037; Viruses - 0; Other Eukaryotes - 2996 (source: NCBI BLink).
BnaA03g01080D	3.42315	2.79604	2.52468	94.4371	80.0804	52.9841	AT5G03850	Nucleic acid-binding, OB-fold-like protein	Nucleic acid-binding, OB-fold-like protein; FUNCTIONS IN: structural constituent of ribosome; INVOLVED IN: translation, ribosome biogenesis; LOCATED IN: cytosolic small ribosomal subunit, ribosome, cell wall, plasma membrane; EXPRESSED IN: 24 plant structures; EXPRESSED DURING: 15 growth stages; CONTAINS InterPro DOMAIN/s: Nucleic acid-binding, OB-fold-like (InterPro:IPR016027), Nucleic acid-bind…
BnaA03g01120D	1.27524	1.50596	1.06475	21.8296	19.385	21.1916	AT5G03880	Thioredoxin family protein	Thioredoxin family protein; FUNCTIONS IN: electron carrier activity; INVOLVED IN: cell redox homeostasis; LOCATED IN: chloroplast thylakoid membrane, chloroplast; EXPRESSED IN: 22 plant structures; EXPRESSED DURING: 14 growth stages; CONTAINS InterPro DOMAIN/s: Thioredoxin fold (InterPro:IPR012335), Glutaredoxin active site (InterPro:IPR011767), Glutathione S-transferase, N-terminal (InterPro:IPR…
BnaA03g01330D	0.411202	0.605549	0.188507	8.70838	3.56174	1.10098	AT5G04660	cytochrome P450, family 77, subfamily A, polypeptide 4	encodes a protein with cytochrome P450 domain
BnaA03g01520D	1.43919	1.93537	2.15279	3.91312	5.42357	8.7894	AT5G04900	NYC1-like	Encodes a chlorophyll b reducatase involved in the degradation of chlorophyll b and LHCII (light harvesting complex II).
BnaA03g02520D	0.0129817	0.0280187	0	0.771165	0.485837	0.87652	AT5G08540	unknown protein; FUNCTIONS IN: molecular_function unknown; INVOLVED IN: biological_process unknown; LOCATED IN: chloroplast thylakoid membrane, chloroplast, chloroplast envelope; EXPRESSED IN: 24 plant structures; EXPRESSED DURING: 13 growth stages; Has 30201 Blast hits to 17322 proteins in 780 species: Archae - 12; Bacteria - 1396; Metazoa - 17338; Fungi - 3422; Plants - 5037; Viruses - 0; Other…	0
BnaA03g03230D	3.20564	3.80753	3.02978	0.469791	0.660387	0.49223	AT5G11110	sucrose phosphate synthase 2F	Encodes a protein with putative sucrose-phosphate synthase activity.Involved in pollen exine formation.
BnaA03g03350D	0	0	0	0	0.0375703	0	AT5G11470	bromo-adjacent homology (BAH) domain-containing protein	bromo-adjacent homology (BAH) domain-containing protein; FUNCTIONS IN: DNA binding, nucleic acid binding; INVOLVED IN: biological_process unknown; LOCATED IN: cellular_component unknown; EXPRESSED IN: 9 plant structures; EXPRESSED DURING: 4 anthesis, C globular stage, petal differentiation and expansion stage, E expanded cotyledon stage, D bilateral stage; CONTAINS InterPro DOMAIN/s: RNA recognit…
BnaA03g03550D	0.0163377	0.0221223	0.029885	0	0	0	.	-	-
BnaA03g03890D	0.0859237	0.0739927	0.021038	3.67121	2.9347	1.49721	AT5G12260	BEST Arabidopsis thaliana protein match is: glycosyltransferase family protein 2 (TAIR:AT5G60700.1); Has 1807 Blast hits to 1807 proteins in 277 species: Archae - 0; Bacteria - 0; Metazoa - 736; Fungi - 347; Plants - 385; Viruses - 0; Other Eukaryotes - 339 (source: NCBI BLink).	0
BnaA03g03940D	6.81787	6.87875	7.29505	1.72808	0.791285	1.24613	AT5G12310	RING/U-box superfamily protein	RING/U-box superfamily protein; FUNCTIONS IN: zinc ion binding; EXPRESSED IN: 24 plant structures; EXPRESSED DURING: 15 growth stages; CONTAINS InterPro DOMAIN/s: Zinc finger, RING-type, conserved site (InterPro:IPR017907), Zinc finger, RING-type (InterPro:IPR001841), Zinc finger, C3HC4 RING-type (InterPro:IPR018957); BEST Arabidopsis thaliana protein match is: RING/U-box superfamily protein (TAI…
BnaA03g04090D	0.258816	0.132745	0.0146903	3.16511	3.5011	0.970369	AT5G12960	Putative glycosyl hydrolase of unknown function (DUF1680)	FUNCTIONS IN: catalytic activity; LOCATED IN: endomembrane system; CONTAINS InterPro DOMAIN/s: Protein of unknown function DUF1680 (InterPro:IPR012878), Six-hairpin glycosidase-like (InterPro:IPR008928); BEST Arabidopsis thaliana protein match is: Putative glycosyl hydrolase of unknown function (DUF1680) (TAIR:AT5G12950.1); Has 1236 Blast hits to 1216 proteins in 340 species: Archae - 6; Bacteria…
BnaA03g04900D	1.27133	0.976199	1.07238	0.491151	0.608052	1.26346	AT5G14440	Surfeit locus protein 2 (SURF2)	Surfeit locus protein 2 (SURF2); CONTAINS InterPro DOMAIN/s: Surfeit locus 2 (InterPro:IPR008833); BEST Arabidopsis thaliana protein match is: Surfeit locus protein 2 (SURF2) (TAIR:AT5G40570.1); Has 6258 Blast hits to 4510 proteins in 365 species: Archae - 8; Bacteria - 221; Metazoa - 2197; Fungi - 751; Plants - 330; Viruses - 76; Other Eukaryotes - 2675 (source: NCBI BLink).
BnaA03g05110D	14.586	6.28556	4.69814	5.94576	0.603017	1.50861	AT5G14920	Gibberellin-regulated family protein	Encodes a GASA domain containing protein that regulates increases in plant growth through GA-induced and DELLA-dependent signal transduction and that can increase abiotic stress resistance by reducing ROS accumulation.
BnaA03g05700D	0	0	0	0.000869667	0.007808	0	.	-	-
BnaA03g05980D	36.5397	22.5208	16.1771	0.390803	0.431456	0.613572	AT5G16370	acyl activating enzyme 5	acyl activating enzyme 5 (AAE5); FUNCTIONS IN: catalytic activity; INVOLVED IN: metabolic process; LOCATED IN: peroxisome; EXPRESSED IN: leaf; CONTAINS InterPro DOMAIN/s: AMP-binding, conserved site (InterPro:IPR020845), AMP-dependent synthetase/ligase (InterPro:IPR000873); BEST Arabidopsis thaliana protein match is: AMP-dependent synthetase and ligase family protein (TAIR:AT5G16340.1); Has 1807 …
BnaA03g05990D	38.7325	30.6852	25.9404	0.0880893	0.121893	0.0953477	AT5G16380	Protein of unknown function, DUF538	Protein of unknown function, DUF538; FUNCTIONS IN: molecular_function unknown; INVOLVED IN: biological_process unknown; LOCATED IN: endomembrane system; EXPRESSED IN: 23 plant structures; EXPRESSED DURING: 13 growth stages; CONTAINS InterPro DOMAIN/s: Protein of unknown function DUF538 (InterPro:IPR007493); BEST Arabidopsis thaliana protein match is: Protein of unknown function, DUF538 (TAIR:AT3G…
BnaA03g06000D	12.9496	8.38062	6.59163	0.843037	0.434993	0.051498	AT5G16390	chloroplastic acetylcoenzyme A carboxylase 1	Encodes for the biotin carboxyl-carrier subunit of the multi-enzyme plastidial acetyl-coenzyme A carboxylase complex.
BnaA03g06270D	4.38576	5.15731	5.04215	1.60104	1.61443	1.49748	.	-	-
BnaA03g06290D	12.9326	15.4317	13.4829	11.0548	11.2237	7.95225	AT5G16880	Target of Myb protein 1	Target of Myb protein 1; FUNCTIONS IN: protein transporter activity; INVOLVED IN: intracellular protein transport, intra-Golgi vesicle-mediated transport; LOCATED IN: Golgi stack, plasma membrane; EXPRESSED IN: 24 plant structures; EXPRESSED DURING: 15 growth stages; CONTAINS InterPro DOMAIN/s: VHS (InterPro:IPR002014), Target of Myb protein 1 (InterPro:IPR014645), GAT (InterPro:IPR004152), ENTH/…
BnaA03g06600D	0.024314	1.83333e-05	0.01525	0	0	0	AT5G17410	Spc97 / Spc98 family of spindle pole body (SBP) component	Spc97 / Spc98 family of spindle pole body (SBP) component; INVOLVED IN: microtubule cytoskeleton organization; LOCATED IN: spindle pole, microtubule organizing center; EXPRESSED IN: 18 plant structures; EXPRESSED DURING: 7 growth stages; CONTAINS InterPro DOMAIN/s: Spc97/Spc98 (InterPro:IPR007259); BEST Arabidopsis thaliana protein match is: spindle pole body component 98 (TAIR:AT5G06680.1); Has …
BnaA03g06900D	3.50629	3.32208	2.51113	2.77463	2.06495	0.793113	AT5G18120	APR-like 7	Encodes a protein disulfide isomerase-like (PDIL) protein, a member of a multigene family within the thioredoxin (TRX) superfamily. This protein also belongs to the adenosine 5'-phosphosulfate reductase-like (APRL) group.
BnaA03g07170D	2.7577	4.22455	4.68137	2.14123	1.74179	1.06958	AT5G18550	Zinc finger C-x8-C-x5-C-x3-H type family protein	Zinc finger C-x8-C-x5-C-x3-H type family protein; FUNCTIONS IN: zinc ion binding, nucleic acid binding; INVOLVED IN: biological_process unknown; LOCATED IN: cellular_component unknown; EXPRESSED IN: 17 plant structures; EXPRESSED DURING: 8 growth stages; CONTAINS InterPro DOMAIN/s: Zinc finger, CCCH-type (InterPro:IPR000571); BEST Arabidopsis thaliana protein match is: Zinc finger C-x8-C-x5-C-x3-…
BnaA03g07860D	2.36242	1.3731	1.15719	1.22243	0.861679	0.836085	AT5G20040	isopentenyltransferase 9	Encodes tRNA isopentenyltransferase AtIPT9.
BnaA03g08170D	0.063269	0	0	0	0	0	AT5G20950	Glycosyl hydrolase family protein	Glycosyl hydrolase family protein; FUNCTIONS IN: hydrolase activity, hydrolyzing O-glycosyl compounds; INVOLVED IN: carbohydrate metabolic process; LOCATED IN: cell wall, membrane, plant-type cell wall; EXPRESSED IN: 25 plant structures; EXPRESSED DURING: 13 growth stages; CONTAINS InterPro DOMAIN/s: Glycoside hydrolase, family 3, N-terminal (InterPro:IPR001764), Glycoside hydrolase, family 3, C-…
BnaA03g08730D	0.653659	0.571138	0.05144	5.47654	2.56964	0.758072	AT5G22930	Protein of unknown function (DUF1635)	Protein of unknown function (DUF1635); CONTAINS InterPro DOMAIN/s: Protein of unknown function DUF1635 (InterPro:IPR012862); BEST Arabidopsis thaliana protein match is: Protein of unknown function (DUF1635) (TAIR:AT3G44940.1); Has 97 Blast hits to 97 proteins in 15 species: Archae - 0; Bacteria - 0; Metazoa - 1; Fungi - 0; Plants - 96; Viruses - 0; Other Eukaryotes - 0 (source: NCBI BLink).
BnaA03g09130D	0.01254	0.0453663	0.091629	3.86419	3.90449	2.45445	AT5G60030	unknown protein; BEST Arabidopsis thaliana protein match is: unknown protein (TAIR:AT1G75335.1); Has 1807 Blast hits to 1807 proteins in 277 species: Archae - 0; Bacteria - 0; Metazoa - 736; Fungi - 347; Plants - 385; Viruses - 0; Other Eukaryotes - 339 (source: NCBI BLink).	0
BnaA03g09150D	0.0283297	0.03271	0.0777133	0.080199	0.135947	0.0784727	AT5G59960	unknown protein; FUNCTIONS IN: molecular_function unknown; INVOLVED IN: biological_process unknown; LOCATED IN: nucleus; EXPRESSED IN: 24 plant structures; EXPRESSED DURING: 15 growth stages; Has 30201 Blast hits to 17322 proteins in 780 species: Archae - 12; Bacteria - 1396; Metazoa - 17338; Fungi - 3422; Plants - 5037; Viruses - 0; Other Eukaryotes - 2996 (source: NCBI BLink).	0
BnaA03g09190D	1.99086	3.51261	4.59341	2.08114	3.01932	3.87273	AT5G59880	actin depolymerizing factor 3	Encodes actin depolymerizing factor 3 (ADF3).
BnaA03g09200D	6.59693	9.97904	3.15781	8.84444	3.85475	1.02122	AT5G59870	histone H2A 6	Encodes HTA6, a histone H2A protein.
BnaA03g09910D	19.7059	23.683	31.0873	36.1982	33.9286	17.0188	AT5G58110	chaperone binding;ATPase activators	chaperone binding;ATPase activators; FUNCTIONS IN: ATPase activator activity, chaperone binding; INVOLVED IN: biological_process unknown; LOCATED IN: cytoplasm; EXPRESSED IN: 23 plant structures; EXPRESSED DURING: 15 growth stages; CONTAINS InterPro DOMAIN/s: Activator of Hsp90 ATPase, N-terminal (InterPro:IPR015310); Has 297 Blast hits to 292 proteins in 99 species: Archae - 0; Bacteria - 0; Met…
BnaA03g09990D	0.224245	0.0401053	0.0595963	8.04229	5.1515	2.30522	AT5G57980	RNA polymerase II fifth largest subunit, C	NRPB5-like protein of unknown function; homologous to budding yeast RPB5
BnaA03g10240D	7.92423	10.3375	11.9835	7.24877	8.04387	7.86594	AT5G57490	voltage dependent anion channel 4	Encodes a voltage-dependent anion channel (VDAC: AT3G01280/VDAC1, AT5G67500/VDAC2, AT5G15090/VDAC3, AT5G57490/VDAC4, AT5G15090/VDAC5). VDACs are reported to be porin-type, beta-barrel diffusion pores. They are prominently localized in the outer mitochondrial membrane and are involved in metabolite exchange between the organelle and the cytosol.
BnaA03g10340D	0.097705	0	0	2.20087	1.32502	2.05395	AT5G57300	S-adenosyl-L-methionine-dependent methyltransferases superfamily protein	S-adenosyl-L-methionine-dependent methyltransferases superfamily protein; FUNCTIONS IN: methyltransferase activity; LOCATED IN: mitochondrion; EXPRESSED IN: 22 plant structures; EXPRESSED DURING: 13 growth stages; CONTAINS InterPro DOMAIN/s: UbiE/COQ5 methyltransferase (InterPro:IPR004033); BEST Arabidopsis thaliana protein match is: S-adenosyl-L-methionine-dependent methyltransferases superfamil…
BnaA03g10980D	1.1848	1.06181	1.26612	1.52229	2.32041	1.70755	AT5G56270	WRKY DNA-binding protein 2	Encodes WRKY transcription factor 2, a zinc-finger protein. In wrky2 mutants, egg cells polarize normally but zygotes fail to reestablish polar organelle positioning from a transient symmetric state, resulting in equal cell division and distorted embryo development.
BnaA03g11350D	1.16919	0.6575	0.425514	11.6576	9.88056	5.28779	AT5G55510	Mitochondrial import inner membrane translocase subunit Tim17/Tim22/Tim23 family protein	Mitochondrial import inner membrane translocase subunit Tim17/Tim22/Tim23 family protein; FUNCTIONS IN: protein transporter activity, P-P-bond-hydrolysis-driven protein transmembrane transporter activity; INVOLVED IN: protein transport; LOCATED IN: mitochondrial inner membrane presequence translocase complex, chloroplast envelope; CONTAINS InterPro DOMAIN/s: Mitochondrial inner membrane transloca…
BnaA03g11980D	8.35461	1.41645	1.14388	3.00006	25.4694	10.1265	AT5G54165	unknown protein; FUNCTIONS IN: molecular_function unknown; INVOLVED IN: biological_process unknown; LOCATED IN: cellular_component unknown; Has 30201 Blast hits to 17322 proteins in 780 species: Archae - 12; Bacteria - 1396; Metazoa - 17338; Fungi - 3422; Plants - 5037; Viruses - 0; Other Eukaryotes - 2996 (source: NCBI BLink).	0
BnaA03g12000D	0.0375213	0	0	0.301733	2.46205	2.02507	AT5G54150	unknown protein; BEST Arabidopsis thaliana protein match is: unknown protein (TAIR:AT5G54148.1); Has 103 Blast hits to 99 proteins in 23 species: Archae - 0; Bacteria - 0; Metazoa - 8; Fungi - 0; Plants - 90; Viruses - 0; Other Eukaryotes - 5 (source: NCBI BLink).	0
BnaA03g12220D	0.00550367	0.0827793	0.00528933	3.45029	0.229622	0.163034	AT5G53520	oligopeptide transporter 8	Encodes an oligopeptide transporter. Target promoter of the male germline-specific transcription factor DUO1.
BnaA03g13040D	3.98565	2.74874	2.7233	5.27167	8.43296	6.79803	.	-	-
BnaA03g13250D	0.384175	1.64732	2.02897	0.0312223	0.0535227	0	AT5G51140	Pseudouridine synthase family protein	Pseudouridine synthase family protein; FUNCTIONS IN: pseudouridine synthase activity; INVOLVED IN: pseudouridine synthesis, RNA modification; LOCATED IN: cellular_component unknown; EXPRESSED IN: 23 plant structures; EXPRESSED DURING: 13 growth stages; CONTAINS InterPro DOMAIN/s: Pseudouridine synthase, catalytic domain (InterPro:IPR020103), Pseudouridine synthase, RluC/RluD (InterPro:IPR006225),…
BnaA03g13500D	3.65101	2.55292	2.76816	11.9012	10.7801	7.02546	AT5G50840	CONTAINS InterPro DOMAIN/s: Taxilin (InterPro:IPR019132); Has 30201 Blast hits to 17322 proteins in 780 species: Archae - 12; Bacteria - 1396; Metazoa - 17338; Fungi - 3422; Plants - 5037; Viruses - 0; Other Eukaryotes - 2996 (source: NCBI BLink).	0
BnaA03g13630D	0.0752007	0.0643013	0	1.92373	6.80677	1.69473	.	-	-
BnaA03g13670D	19.0131	23.9575	22.9019	12.2753	9.42239	6.76451	AT2G30050	transducin family protein / WD-40 repeat family protein	transducin family protein / WD-40 repeat family protein; FUNCTIONS IN: nucleotide binding; INVOLVED IN: membrane budding; LOCATED IN: nucleolus, heterotrimeric G-protein complex; EXPRESSED IN: 25 plant structures; EXPRESSED DURING: 15 growth stages; CONTAINS InterPro DOMAIN/s: WD40 repeat 2 (InterPro:IPR019782), WD40 repeat-like-containing domain (InterPro:IPR011046), WD40-repeat-containing domai…
BnaA03g14060D	0	0	0	0.890041	1.31635	1.04411	AT2G30590	WRKY DNA-binding protein 21	Encodes WRKY DNA-binding protein 21 (WRKY21).
BnaA03g14280D	0.002592	0.0426593	0	6.60311	3.65665	0.77965	AT2G31085	CLAVATA3/ESR-RELATED 6	Member of a large family of putative ligands homologous to the Clavata3 gene. Consists of a single exon. Can replace CLV3 function in vivo.
BnaA03g14610D	0.735941	0.422041	0.242932	0.432469	0.358835	0.325648	AT2G31580	tRNAHis guanylyltransferase	ICA1 is a nuclear localized member of the tRNA(His) guanylyl transferase superfamily. Loss of function alleles show increased sensitivity to growth at high temperatures defects in cell cycle progression and DNA repair.
BnaA03g14630D	3.52852	3.37839	3.88126	56.9655	27.1615	36.419	AT2G31610	Ribosomal protein S3 family protein	Ribosomal protein S3 family protein; FUNCTIONS IN: structural constituent of ribosome; INVOLVED IN: response to salt stress, translation, response to abiotic stimulus; LOCATED IN: in 6 components; EXPRESSED IN: root, cultured cell, leaf; CONTAINS InterPro DOMAIN/s: K Homology, prokaryotic type (InterPro:IPR009019), K Homology, type 2 (InterPro:IPR004044), K Homology (InterPro:IPR004087), Ribosoma…
BnaA03g15160D	1.37554	1.17535	1.08163	4.95085	5.35926	3.6818	AT2G32980	unknown protein; Has 158 Blast hits to 154 proteins in 73 species: Archae - 0; Bacteria - 61; Metazoa - 0; Fungi - 0; Plants - 55; Viruses - 28; Other Eukaryotes - 14 (source: NCBI BLink).	0
BnaA03g15450D	0	0	0	0.121286	0.0906373	0.0678607	-	-	-
BnaA03g15530D	0.39001	1.05597	0.381174	3.76237	2.00287	2.21556	.	-	-
BnaA03g15600D	0.298202	0.292429	0.339412	2.51573	3.74063	2.45328	.	-	-
BnaA03g15760D	0.556952	0.99198	1.92766	18.6694	22.7574	15.8191	AT2G34250	SecY protein transport family protein	SecY protein transport family protein; FUNCTIONS IN: P-P-bond-hydrolysis-driven protein transmembrane transporter activity; INVOLVED IN: response to salt stress, protein secretion; LOCATED IN: membrane; EXPRESSED IN: 23 plant structures; EXPRESSED DURING: 15 growth stages; CONTAINS InterPro DOMAIN/s: SecY protein (InterPro:IPR002208), Translocon Sec61/SecY, plug domain (InterPro:IPR019561); BEST …
BnaA03g15980D	2.18247	2.39645	2.70239	4.936	4.26263	3.64873	AT2G34730	myosin heavy chain-related	myosin heavy chain-related; BEST Arabidopsis thaliana protein match is: unknown protein (TAIR:AT5G14990.1); Has 79454 Blast hits to 45133 proteins in 2455 species: Archae - 1380; Bacteria - 12637; Metazoa - 37354; Fungi - 6686; Plants - 3988; Viruses - 410; Other Eukaryotes - 16999 (source: NCBI BLink).
BnaA03g16010D	0.02518	0.0331907	0.019137	0.00997333	0.012309	0.004386	AT2G34750	RNA polymerase I specific transcription initiation factor RRN3 protein	RNA polymerase I specific transcription initiation factor RRN3 protein; FUNCTIONS IN: RNA polymerase I transcription factor activity; INVOLVED IN: biological_process unknown; LOCATED IN: cellular_component unknown; EXPRESSED IN: 23 plant structures; EXPRESSED DURING: 13 growth stages; CONTAINS InterPro DOMAIN/s: RNA polymerase I specific transcription initiation factor RRN3 (InterPro:IPR007991); …
BnaA03g16240D	0	0	0	0.00336367	0.001424	0.0376343	AT2G35658	unknown protein; FUNCTIONS IN: molecular_function unknown; INVOLVED IN: biological_process unknown; LOCATED IN: cellular_component unknown; BEST Arabidopsis thaliana protein match is: unknown protein (TAIR:AT4G16840.1); Has 30201 Blast hits to 17322 proteins in 780 species: Archae - 12; Bacteria - 1396; Metazoa - 17338; Fungi - 3422; Plants - 5037; Viruses - 0; Other Eukaryotes - 2996 (source: NC…	0
BnaA03g16590D	6.77902	5.83258	5.21675	8.50035	5.91846	7.17977	AT2G36230	Aldolase-type TIM barrel family protein	Encodes a BBMII isomerase involved in histidine biosynthesis.
BnaA03g16700D	1.24286	0.36313	0.152413	0.113321	3.6967	0.951305	AT2G36400	growth-regulating factor 3	Growth regulating factor encoding transcription activator. One of the nine members of a GRF gene family, containing nuclear targeting domain. Mutants result in smaller leaves indicating the role of the gene in leaf development. Expressed in root, shoot and flower.
BnaA03g17570D	0.449501	0.141834	0.309332	1.23398	4.6388	1.57496	AT2G38040	acetyl Co-enzyme a carboxylase carboxyltransferase alpha subunit	encodes the carboxyltransferase alpha subunit of acetyl-CoA carboxylase, involved in de novo fatty acid biosynthesis
BnaA03g17880D	1.12792	0.867124	0.881351	0.979351	0.652962	0.73814	AT2G38570	CONTAINS InterPro DOMAIN/s: PRC-barrel-like (InterPro:IPR011033); Has 300 Blast hits to 300 proteins in 81 species: Archae - 0; Bacteria - 135; Metazoa - 0; Fungi - 0; Plants - 37; Viruses - 0; Other Eukaryotes - 128 (source: NCBI BLink).	0
BnaA03g18520D	1.89648	1.34425	1.812	5.85529	4.74266	3.6668	AT2G39290	phosphatidylglycerolphosphate synthase 1	Encodes a phosphatidylglycerolphosphate synthase 2C which is dual-targeted into chloroplasts and mitochondria. Mutant plants have mutant chloroplasts but normal mitochondria.
BnaA03g18590D	2.37916	1.7659	0.761394	7.39206	6.23487	3.5813	AT2G39390	Ribosomal L29 family protein	Ribosomal L29 family protein ; FUNCTIONS IN: structural constituent of ribosome; INVOLVED IN: translation, ribosome biogenesis; LOCATED IN: cytosolic ribosome, ribosome, cytosolic large ribosomal subunit; EXPRESSED IN: 22 plant structures; EXPRESSED DURING: 13 growth stages; CONTAINS InterPro DOMAIN/s: Ribosomal protein L29 (InterPro:IPR001854), Ribosomal protein L29, conserved site (InterPro:IPR…
BnaA03g18910D	8.31284	1.5799	3.67318	0.72647	7.84477	0.646209	AT2G40140	zinc finger (CCCH-type) family protein	CZF1; CONTAINS InterPro DOMAIN/s: Zinc finger, CCCH-type (InterPro:IPR000571), Ankyrin repeat-containing domain (InterPro:IPR020683), Ankyrin repeat (InterPro:IPR002110); BEST Arabidopsis thaliana protein match is: salt-inducible zinc finger 1 (TAIR:AT3G55980.1); Has 1196 Blast hits to 1143 proteins in 183 species: Archae - 4; Bacteria - 47; Metazoa - 401; Fungi - 61; Plants - 441; Viruses - 2; O…
BnaA03g18950D	2.77661	4.1747	5.52999	0	0.0252837	0.0125423	.	-	-
BnaA03g19270D	0	0	0	6.41769	7.32973	12.7748	AT2G40880	cystatin A	Encodes a protein with cysteine proteinase inhibitor activity. Overexpression increases tolerance to abiotic stressors (i.e.salt,osmotic, cold stress).
BnaA03g19390D	0.0458167	11.2712	0.0843417	0.879774	222.37	51.046	AT2G41225	Encodes a protein of unknown function that is involved in regulation of cell expansion. Based on sequence similarity OSR2 is localized to the plasma membrane. It is expressed in organs that are undergoing cell expansion.	unknown protein; FUNCTIONS IN: molecular_function unknown; INVOLVED IN: biological_process unknown; LOCATED IN: endomembrane system; Has 30201 Blast hits to 17322 proteins in 780 species: Archae - 12; Bacteria - 1396; Metazoa - 17338; Fungi - 3422; Plants - 5037; Viruses - 0; Other Eukaryotes - 2996 (source: NCBI BLink).
BnaA03g19720D	1.17101	1.6932	0.945869	0.0848037	0	0	AT2G42040	CONTAINS InterPro DOMAIN/s: WRC (InterPro:IPR014977); Has 219 Blast hits to 219 proteins in 19 species: Archae - 0; Bacteria - 0; Metazoa - 3; Fungi - 0; Plants - 215; Viruses - 0; Other Eukaryotes - 1 (source: NCBI BLink).	0
BnaA03g19740D	0	0	0	0.234055	0.369532	0.231428	AT2G42070	nudix hydrolase homolog 23	Encodes a plastid-localized Nudix hydrolase that has FAD pyrophosphohydrolase activity. Negative feedback regulation of the metabolism of flavins through the hydrolysis of FAD by AtNUDX23 in plastids is involved in the flavin homeostasis in plant cells.
BnaA03g20470D	8.83124	8.81207	8.63497	5.03253	4.54652	3.63582	AT2G43790	MAP kinase 6	Encodes a MAP kinase induced by pathogens, ethylene biosynthesis, oxidative stress and osmotic stress.Also involved in ovule development. Homozygous mutants in a MPK3 heterozygous background are female sterile due to defects in integument development.MPK6 appears to be associated with the microsomal compartment and may be involved in mediating secretory processes.
BnaA03g21190D	0.249616	0.520039	0.267061	2.40137	3.90428	1.37459	AT2G45930	unknown protein; FUNCTIONS IN: molecular_function unknown; INVOLVED IN: biological_process unknown; LOCATED IN: mitochondrion; BEST Arabidopsis thaliana protein match is: unknown protein (TAIR:AT4G16090.1); Has 161 Blast hits to 161 proteins in 2 species: Archae - 0; Bacteria - 0; Metazoa - 0; Fungi - 0; Plants - 161; Viruses - 0; Other Eukaryotes - 0 (source: NCBI BLink).	0
BnaA03g21570D	0.392647	0.608089	0.491703	0	0	0	AT2G46970	phytochrome interacting factor 3-like 1	encodes a novel Myc-related bHLH transcription factor, which physically associated with APRR1/TOC1 and is a member of PIF3 transcription factor family.
BnaA03g21980D	5.41481	3.81313	4.24027	10.0661	10.188	9.92287	.	-	-
BnaA03g22000D	0.089961	0.479859	0.548347	8.24853	4.39586	12.2633	.	-	-
BnaA03g22010D	0.743137	2.61095	4.07023	0.11808	0	0	AT2G28940	Protein kinase superfamily protein	Protein kinase superfamily protein; FUNCTIONS IN: protein kinase activity, kinase activity, ATP binding; INVOLVED IN: protein amino acid phosphorylation; LOCATED IN: endomembrane system; EXPRESSED IN: 19 plant structures; EXPRESSED DURING: 13 growth stages; CONTAINS InterPro DOMAIN/s: Protein kinase, catalytic domain (InterPro:IPR000719), Serine/threonine-protein kinase-like domain (InterPro:IPR0…
BnaA03g22700D	0.0533887	0.523204	0	2.19536	11.8024	3.55846	AT2G26440	Plant invertase/pectin methylesterase inhibitor superfamily	Plant invertase/pectin methylesterase inhibitor superfamily; FUNCTIONS IN: enzyme inhibitor activity, pectinesterase activity; INVOLVED IN: cell wall modification; LOCATED IN: endomembrane system, cell wall, plant-type cell wall; EXPRESSED IN: 20 plant structures; EXPRESSED DURING: 13 growth stages; CONTAINS InterPro DOMAIN/s: Pectinesterase, active site (InterPro:IPR018040), Pectin lyase fold/vi…
BnaA03g23510D	0	5.03178	0.0231903	0.618401	40.7644	5.77297	AT5G50750	reversibly glycosylated polypeptide 4	RGP4 is a reversibly glycosylated polypeptide. Analyses using tagged RGP4 suggest that it is present in the cytosol and in association with the Golgi apparatus. Recombinant RGP4 does not have UDP-arabinose mutase activity based on an in vitro assay even though the related RGP1, RGP2, and RGP3 proteins do have activity in the same assay. RGP4 can form complexes with RGP1 and RGP2. RGP4 is expresse…
BnaA03g23530D	0	6.62049	0.67259	1.1223	43.5716	10.4263	.	-	-
BnaA03g23810D	0.480099	0.404373	0.264893	4.39177	2.51321	7.54446	AT4G08950	Phosphate-responsive 1 family protein	EXORDIUM (EXO); FUNCTIONS IN: molecular_function unknown; INVOLVED IN: response to brassinosteroid stimulus; LOCATED IN: cell wall, plant-type cell wall; EXPRESSED IN: 21 plant structures; EXPRESSED DURING: 13 growth stages; CONTAINS InterPro DOMAIN/s: Phosphate-induced protein 1 (InterPro:IPR006766); BEST Arabidopsis thaliana protein match is: Phosphate-responsive 1 family protein (TAIR:AT1G3514…
BnaA03g24100D	0	0	0	76.2058	73.5586	15.6256	.	-	-
BnaA03g24630D	0.021072	0.070297	0.00829433	0	0	0	AT4G10940	RING/U-box protein	RING/U-box protein; FUNCTIONS IN: DNA binding, zinc ion binding; INVOLVED IN: regulation of transcription, DNA-dependent; EXPRESSED IN: stem, embryo, flower, seed; EXPRESSED DURING: C globular stage, petal differentiation and expansion stage, E expanded cotyledon stage; CONTAINS InterPro DOMAIN/s: Zinc finger, RING-type, conserved site (InterPro:IPR017907), Zinc finger, RING-type (InterPro:IPR001…
BnaA03g24950D	8.82485	15.034	22.3158	1.01352	2.78416	4.89079	AT4G12030	bile acid transporter 5	Required for the biosynthesis of methionine-derived glucosinolates. Involved in the transport of 2-keto acids between chloroplasts and the cytosol.
BnaA03g25250D	13.55	13.3145	13.4364	0	0	0	AT4G12610	transcription activators;DNA binding;RNA polymerase II transcription factors;catalytics;transcription initiation factors	RAP74; FUNCTIONS IN: RNA polymerase II transcription factor activity, transcription initiation factor activity, transcription activator activity, DNA binding, catalytic activity; INVOLVED IN: transcription initiation from RNA polymerase II promoter, positive regulation of transcription; LOCATED IN: nucleus, chloroplast; EXPRESSED IN: shoot, root, guard cell; CONTAINS InterPro DOMAIN/s: Transcript…
BnaA03g25580D	310.134	323.081	425.124	2.11263	4.1184	7.53427	AT4G04840	methionine sulfoxide reductase B6	methionine sulfoxide reductase B6 (MSRB6); FUNCTIONS IN: peptide-methionine-(S)-S-oxide reductase activity; INVOLVED IN: oxidation reduction; LOCATED IN: cytosol; EXPRESSED IN: 11 plant structures; EXPRESSED DURING: 7 growth stages; CONTAINS InterPro DOMAIN/s: Methionine sulphoxide reductase B (InterPro:IPR002579), Mss4-like (InterPro:IPR011057); BEST Arabidopsis thaliana protein match is: methio…
BnaA03g25870D	0	0.0393467	0	1.83347	2.45808	3.38912	AT4G03070	2-oxoglutarate (2OG) and Fe(II)-dependent oxygenase superfamily protein	Encodes a possible 2-oxoglutarate-dependent dioxygenase that is involved in glucosinolate biosynthesis. The gene is expressed in all ecotypes examined but the enzymatic activity has not been determined experimentally. In Col, there is one copy of this gene (aka AOP1.1) but Ler contains two copies, AOP1.1 and a tightly linked AOP1.2.
BnaA03g26110D	4.49416	3.80062	4.48651	38.1866	32.1721	25.563	AT4G02580	NADH-ubiquinone oxidoreductase 24 kDa subunit, putative	NADH-ubiquinone oxidoreductase 24 kDa subunit, putative; FUNCTIONS IN: NADH dehydrogenase (ubiquinone) activity, zinc ion binding; INVOLVED IN: response to oxidative stress, mitochondrial electron transport, NADH to ubiquinone; LOCATED IN: mitochondrion, mitochondrial respiratory chain complex I, respiratory chain complex I; EXPRESSED IN: 24 plant structures; EXPRESSED DURING: 15 growth stages; C…
BnaA03g26150D	0.531391	0.810579	0	0	0	0	AT4G02500	UDP-xylosyltransferase 2	Encodes a protein with xylosyltransferase activity, which is specific for UDP-xylose as donor substrate and for oligosaccharides with a degree of polymerization >4. Although the enzyme utilizes either cellopentaose or cellohexaose, its activity is four-fold higher with cellohexaose as an acceptor compared to cellopentaose. The enzyme is able to add several xylosyl residues to the acceptor forming…
BnaA03g26380D	1.50443	2.38357	0.776695	1.51974	1.82592	2.09289	AT4G02050	sugar transporter protein 7	sugar transporter protein 7 (STP7); FUNCTIONS IN: carbohydrate transmembrane transporter activity, sugar:hydrogen symporter activity; INVOLVED IN: transport, transmembrane transport; LOCATED IN: plasma membrane, membrane; EXPRESSED IN: 22 plant structures; EXPRESSED DURING: 13 growth stages; CONTAINS InterPro DOMAIN/s: Sugar transporter, conserved site (InterPro:IPR005829), Major facilitator supe…
BnaA03g26660D	0.0774747	0.121222	0.019453	0.766667	2.00159	1.56758	AT4G01450	nodulin MtN21 /EamA-like transporter family protein	nodulin MtN21-like transporter family protein
BnaA03g27180D	7.0067	10.174	9.35426	1.51495	1.17399	1.47191	.	-	-
BnaA03g28140D	3.27561	2.6534	2.25203	0.119635	0.00083	0.000667333	AT3G02830	zinc finger protein 1	Encodes a zinc finger protein that binds to PORA mRNA in vivo and recruits the Pfr form of phytochrome to the 5&#8242;-UTR of PORA mRNA to regulate translation of the mRNA.
BnaA03g28480D	3.38626	0.878496	0.734359	3.99679	3.16606	0.134818	AT3G04120	glyceraldehyde-3-phosphate dehydrogenase C subunit 1	encodes cytosolic GADPH (C subunit) involved in the glycolytic pathway but also interacts with H2O2 potentially placing it in a signalling cascade induced by ROS.
BnaA03g28730D	4.13531	4.19213	3.19054	1.20294	1.05423	1.09248	AT3G04680	CLP-similar protein 3	Encodes a nuclear protein that functions in mRNA processing. Mutations in this gene cause embryo lethality and reduced transmission through the female gametophyte. Over-expression of a CLPS3:TAP protein changes the relative levels of two alternatively processed FCA transcripts. It also causes abnormal phyllotaxy and flower development, early flowering under long and short days, and increased leve…
BnaA03g29180D	3.69969	2.82325	3.32672	2.1622	0.335394	0.022605	AT3G05840	Protein kinase superfamily protein	encodes a SHAGGY-like kinase involved in meristem organization.
BnaA03g31040D	0.572795	0.927174	0.968032	0.886873	1.42408	0.387497	AT3G08840	D-alanine--D-alanine ligase family	D-alanine--D-alanine ligase family; FUNCTIONS IN: D-alanine-D-alanine ligase activity, catalytic activity, ATP binding; INVOLVED IN: peptidoglycan biosynthetic process; LOCATED IN: chloroplast; EXPRESSED IN: 22 plant structures; EXPRESSED DURING: 13 growth stages; CONTAINS InterPro DOMAIN/s: PreATP-grasp-like fold (InterPro:IPR016185), ATP-grasp fold (InterPro:IPR011761), ATP-grasp fold, subdomai…
BnaA03g31390D	0	0.072108	0	1.31885	1.17043	1.0238	-	-	-
BnaA03g31820D	1.47653	1.12646	1.12149	7.98188	8.23976	6.80536	-	-	-
BnaA03g31830D	0.019302	0.002729	0	0.142573	0.064284	0.203186	-	-	-
BnaA03g32100D	0	0	0	0.000422333	0.000853667	0	AT3G12012	conserved peptide upstream open reading frame 20	Upstream open reading frames (uORFs) are small open reading frames found in the 5' UTR of a mature mRNA, and can potentially mediate translational regulation of the largest, or major, ORF (mORF). CPuORF20 represents a conserved upstream opening reading frame relative to major ORF AT3G12010.1
BnaA03g32210D	13.3151	17.0654	18.5752	0	0	0	AT3G12290	Amino acid dehydrogenase family protein	Amino acid dehydrogenase family protein; FUNCTIONS IN: binding, catalytic activity; INVOLVED IN: folic acid and derivative biosynthetic process, metabolic process; LOCATED IN: chloroplast; EXPRESSED IN: 25 plant structures; EXPRESSED DURING: 14 growth stages; CONTAINS InterPro DOMAIN/s: Tetrahydrofolate dehydrogenase/cyclohydrolase, NAD(P)-binding domain (InterPro:IPR020631), Tetrahydrofolate deh…
BnaA03g33240D	1.84304	3.19566	5.13975	1.53318	1.34016	0.921807	AT3G14172	FUNCTIONS IN: molecular_function unknown; INVOLVED IN: biological_process unknown; LOCATED IN: cellular_component unknown; BEST Arabidopsis thaliana protein match is: COP1-interacting protein-related (TAIR:AT1G72410.1); Has 30201 Blast hits to 17322 proteins in 780 species: Archae - 12; Bacteria - 1396; Metazoa - 17338; Fungi - 3422; Plants - 5037; Viruses - 0; Other Eukaryotes - 2996 (source: NC…	0
BnaA03g33510D	0.0672107	0.240542	0.211184	0	0	0	-	-	-
BnaA03g33520D	1.38226	1.73942	1.46979	0	0.035848	0	.	-	-
BnaA03g34520D	0	0.00676733	0	0	0	0	AT3G17420	glyoxysomal protein kinase 1	serine/threonine protein kinase-like protein
BnaA03g34530D	2.1695	2.53097	3.02399	0.127139	0.15713	0	AT3G17440	novel plant snare 13	member of NPSN Gene Family
BnaA03g35690D	20.3805	9.9063	12.1498	0	0	0	AT3G20360	TRAF-like family protein	TRAF-like family protein; FUNCTIONS IN: molecular_function unknown; INVOLVED IN: biological_process unknown; LOCATED IN: endomembrane system; CONTAINS InterPro DOMAIN/s: TRAF-like (InterPro:IPR008974), MATH (InterPro:IPR002083); BEST Arabidopsis thaliana protein match is: TRAF-like family protein (TAIR:AT3G20370.1); Has 719 Blast hits to 567 proteins in 35 species: Archae - 0; Bacteria - 0; Metaz…
BnaA03g35870D	0	0	0	0.0149433	0.09155	0.0105717	-	-	-
BnaA03g36650D	11.1579	17.3126	13.8585	6.50909	11.2595	6.41983	AT3G22480	prefoldin 2	prefoldin 2 (PDF2); FUNCTIONS IN: unfolded protein binding; INVOLVED IN: protein folding; LOCATED IN: prefoldin complex; EXPRESSED IN: 22 plant structures; EXPRESSED DURING: 13 growth stages; CONTAINS InterPro DOMAIN/s: Prefoldin beta-like (InterPro:IPR002777), Prefoldin (InterPro:IPR009053); Has 423 Blast hits to 423 proteins in 206 species: Archae - 15; Bacteria - 0; Metazoa - 139; Fungi - 122;…
BnaA03g37220D	0.476441	0.263383	0.0487467	2.58282	3.61321	0.948683	.	-	-
BnaA03g37300D	0.0445013	0.03723	0.0454653	0.202144	0.00900733	0.0717877	AT3G24315	Sec20 family protein	AtSec20; CONTAINS InterPro DOMAIN/s: Sec20 (InterPro:IPR005606); Has 291 Blast hits to 291 proteins in 130 species: Archae - 0; Bacteria - 0; Metazoa - 136; Fungi - 95; Plants - 46; Viruses - 0; Other Eukaryotes - 14 (source: NCBI BLink).
BnaA03g37330D	3.94758	3.7021	4.42432	0.016195	0	0	AT3G24360	ATP-dependent caseinolytic (Clp) protease/crotonase family protein	ATP-dependent caseinolytic (Clp) protease/crotonase family protein; FUNCTIONS IN: 3-hydroxyisobutyryl-CoA hydrolase activity, catalytic activity; INVOLVED IN: fatty acid beta-oxidation, metabolic process; LOCATED IN: membrane; EXPRESSED IN: 12 plant structures; EXPRESSED DURING: 6 growth stages; CONTAINS InterPro DOMAIN/s: Crotonase, core (InterPro:IPR001753); BEST Arabidopsis thaliana protein ma…
BnaA03g37780D	17.3627	6.42341	3.58993	5.86311	1.08621	0.384276	AT2G04570	GDSL-like Lipase/Acylhydrolase superfamily protein	GDSL-motif esterase/acyltransferase/lipase. Enzyme group with broad substrate specificity that may catalyze acyltransfer or hydrolase reactions with lipid and non-lipid substrates.
BnaA03g37820D	3.80821	2.83291	3.06036	0.470662	0.497414	0.916057	AT2G04790	unknown protein; Has 45 Blast hits to 45 proteins in 15 species: Archae - 0; Bacteria - 0; Metazoa - 0; Fungi - 0; Plants - 43; Viruses - 0; Other Eukaryotes - 2 (source: NCBI BLink).	0
BnaA03g37850D	0.01343	0.654013	0	55.4461	40.1717	0.742546	-	-	-
BnaA03g38230D	0	0	0	4.17313	4.73927	4.23068	.	-	-
BnaA03g38420D	0.0639673	0.0394517	0.0316327	0.0684547	0.0367573	0.020049	.	-	-
BnaA03g40830D	0	0.28117	0.0373143	1.53227	6.41292	2.86376	AT3G50440	methyl esterase 10	Encodes a protein shown to have methyl jasmonate esterase activity in vitro. This protein does not act on methyl IAA, MeSA, MeGA4, or MEGA9 in vitro.
BnaA03g41440D	1.06807	0.273015	0.0949317	0	0	0	AT3G51670	SEC14 cytosolic factor family protein / phosphoglyceride transfer family protein	SEC14 cytosolic factor family protein / phosphoglyceride transfer family protein; FUNCTIONS IN: transporter activity; INVOLVED IN: transport; LOCATED IN: plasma membrane; EXPRESSED IN: 23 plant structures; EXPRESSED DURING: 13 growth stages; CONTAINS InterPro DOMAIN/s: Cellular retinaldehyde-binding/triple function, C-terminal (InterPro:IPR001251), Cellular retinaldehyde-binding/triple function, …
BnaA03g41520D	0.87519	0.322327	0.730196	1.16652	2.09881	2.74693	AT3G51880	high mobility group B1	Encodes a protein belonging to the subgroup of HMGB (high mobility group B) proteins that have a distinctive DNA-binding motif, the HMG-box domain. The motif confers non-sequence specific interaction with linear DNA and structure-specific binding to distorted DNA sites. The HMGB proteins are involved in the assembly of nucleoprotein complexes. Can be phosphorylated by CK2alpha. In interphase cell…
BnaA03g42320D	1.13855	1.21446	0.767573	12.1298	26.0836	9.48035	.	-	-
BnaA03g42520D	14.1178	19.157	13.3737	0	0	0.193095	AT4G16380	Heavy metal transport/detoxification superfamily protein	Heavy metal transport/detoxification superfamily protein ; FUNCTIONS IN: metal ion binding; INVOLVED IN: metal ion transport; LOCATED IN: cellular_component unknown; CONTAINS InterPro DOMAIN/s: Heavy metal transport/detoxification protein (InterPro:IPR006121); BEST Arabidopsis thaliana protein match is: Heavy metal transport/detoxification superfamily protein (TAIR:AT1G51090.1); Has 3914 Blast hi…
BnaA03g42960D	4.25109	2.05382	2.69655	0.309752	0.249987	0.195939	AT4G17210	Plant protein of unknown function (DUF827)	Plant protein of unknown function (DUF827); FUNCTIONS IN: molecular_function unknown; INVOLVED IN: biological_process unknown; LOCATED IN: chloroplast; CONTAINS InterPro DOMAIN/s: Protein of unknown function DUF827, plant (InterPro:IPR008545); BEST Arabidopsis thaliana protein match is: Plant protein of unknown function (DUF827) (TAIR:AT1G12150.1); Has 102236 Blast hits to 56929 proteins in 2947 …
BnaA03g43260D	0	0	0	0	0.00966033	0	.	-	-
BnaA03g43480D	0	0	0	0.0806603	0.009038	0.000360667	.	-	-
BnaA03g43940D	5.36359	5.53475	5.04848	5.48937	6.25741	4.19757	AT4G19210	RNAse l inhibitor protein 2	member of RLI subfamily
BnaA03g44000D	0.381706	0.326735	0	3.81947	2.18643	0.303272	AT4G19380	Long-chain fatty alcohol dehydrogenase family protein	Long-chain fatty alcohol dehydrogenase family protein; FUNCTIONS IN: electron carrier activity, oxidoreductase activity, acting on CH-OH group of donors, FAD binding; LOCATED IN: cellular_component unknown; EXPRESSED IN: 14 plant structures; EXPRESSED DURING: 6 growth stages; CONTAINS InterPro DOMAIN/s: Glucose-methanol-choline oxidoreductase, N-terminal (InterPro:IPR000172), Glucose-methanol-cho…
BnaA03g44140D	1.02291	0.782325	0.491688	0	0	0.006405	AT4G19670	RING/U-box superfamily protein	RING/U-box superfamily protein; FUNCTIONS IN: zinc ion binding; EXPRESSED IN: 22 plant structures; EXPRESSED DURING: 13 growth stages; CONTAINS InterPro DOMAIN/s: Zinc finger, RING-type, conserved site (InterPro:IPR017907), Zinc finger, C6HC-type (InterPro:IPR002867), Zinc finger, RING-type (InterPro:IPR001841); BEST Arabidopsis thaliana protein match is: zinc finger (C3HC4-type RING finger) fami…
BnaA03g44780D	0	0	0	3.20798	0.136937	0.188671	AT4G21650	Subtilase family protein	Subtilase family protein; FUNCTIONS IN: identical protein binding, serine-type endopeptidase activity; INVOLVED IN: proteolysis, negative regulation of catalytic activity; LOCATED IN: plant-type cell wall; EXPRESSED IN: 22 plant structures; EXPRESSED DURING: 13 growth stages; CONTAINS InterPro DOMAIN/s: Protease-associated PA (InterPro:IPR003137), Proteinase inhibitor, propeptide (InterPro:IPR009…
BnaA03g45000D	0	0	0	0.208879	0.445886	0.427331	.	-	-
BnaA03g45290D	0.000544	0	0	0.00169767	0.00049	0	AT4G22320	unknown protein; BEST Arabidopsis thaliana protein match is: unknown protein (TAIR:AT5G55210.1); Has 8953 Blast hits to 5363 proteins in 542 species: Archae - 33; Bacteria - 806; Metazoa - 2454; Fungi - 831; Plants - 279; Viruses - 151; Other Eukaryotes - 4399 (source: NCBI BLink).	0
BnaA03g45390D	35.4945	36.6019	45.1564	55.321	49.7068	67.178	AT4G22570	adenine phosphoribosyl transferase 3	Encodes an adenine phosphoribosyltransferase (APT; EC 2.4.2.7), which is a constitutively expressed enzyme involved in the one-step salvage of adenine to AMP. APT3 has higher affinity for zeatin, isopentenyladenine and benzyladenine than APT1 but lower Vmax than APT1.
BnaA03g45710D	3.13366	2.17001	2.25591	0.241049	0.105667	0.029584	AT4G23060	IQ-domain 22	IQ-domain 22 (IQD22); CONTAINS InterPro DOMAIN/s: IQ calmodulin-binding region (InterPro:IPR000048); BEST Arabidopsis thaliana protein match is: IQ-domain 26 (TAIR:AT3G16490.1); Has 890 Blast hits to 763 proteins in 40 species: Archae - 0; Bacteria - 0; Metazoa - 31; Fungi - 3; Plants - 728; Viruses - 0; Other Eukaryotes - 128 (source: NCBI BLink).
BnaA03g45880D	0.0153133	0.025168	0.0522817	2.94374	2.43427	3.02231	AT4G23330	BEST Arabidopsis thaliana protein match is: eukaryotic translation initiation factor 3A (TAIR:AT4G11420.1); Has 63 Blast hits to 55 proteins in 14 species: Archae - 0; Bacteria - 0; Metazoa - 1; Fungi - 0; Plants - 62; Viruses - 0; Other Eukaryotes - 0 (source: NCBI BLink).	0
BnaA03g45980D	0.183211	0.180672	0.120115	1.89401	1.57087	1.06751	AT4G23450	RING/U-box superfamily protein	AtAIRP1 gene encodes a C3H2C3-type RING E3 Ub ligase. It has been shown to be a positive regulator in the Arabidopsis ABA-dependent drought response.
BnaA03g46260D	0	0	0	23.2353	14.1169	13.1232	AT4G23760	Cox19-like CHCH family protein	Cox19-like CHCH family protein; CONTAINS InterPro DOMAIN/s: CHCH (InterPro:IPR010625); Has 3 Blast hits to 3 proteins in 2 species: Archae - 0; Bacteria - 0; Metazoa - 0; Fungi - 0; Plants - 3; Viruses - 0; Other Eukaryotes - 0 (source: NCBI BLink).
BnaA03g46670D	0.235277	0.173476	0.211431	0.0763877	0.0133747	0.0326877	-	-	-
BnaA03g46910D	0	0	0	0.0840797	0.0342653	0.0297263	AT4G24770	31-kDa RNA binding protein	Encodes a chloroplast RNA-binding protein. A substrate of the type III effector HopU1 (mono-ADP-ribosyltransferase). Required for editing and stability of specific chloroplast mRNAs.
BnaA03g46980D	0.719232	0.956306	1.06171	8.59413	7.50049	6.20143	AT4G24840	FUNCTIONS IN: molecular_function unknown; INVOLVED IN: protein transport, Golgi organization; LOCATED IN: vacuole; EXPRESSED IN: 23 plant structures; EXPRESSED DURING: 13 growth stages; CONTAINS InterPro DOMAIN/s: COG complex component, COG2 (InterPro:IPR009316); Has 30201 Blast hits to 17322 proteins in 780 species: Archae - 12; Bacteria - 1396; Metazoa - 17338; Fungi - 3422; Plants - 5037; Viru…	0
BnaA03g47390D	0.81487	0.780589	0.748539	0	0	0	-	-	-
BnaA03g47900D	5.7412	4.82491	4.48572	0	0	0	AT4G26210	Mitochondrial ATP synthase subunit G protein	Mitochondrial ATP synthase subunit G protein; FUNCTIONS IN: hydrogen ion transmembrane transporter activity; INVOLVED IN: proton transport, ATP synthesis coupled proton transport; LOCATED IN: mitochondrial proton-transporting ATP synthase complex, coupling factor F(o); EXPRESSED IN: 22 plant structures; EXPRESSED DURING: 13 growth stages; CONTAINS InterPro DOMAIN/s: ATPase, F0 complex, subunit G,…
BnaA03g48300D	22.4284	11.5313	9.12763	7.1083	4.48644	1.54996	AT4G26840	small ubiquitin-like modifier 1	Encodes a small ubiquitin-like modifier (SUMO) polypeptide that becomes covalently attached to various intracellular protein targets, much like ubiquitination, leading to post-translational modification of those targets.
BnaA03g48470D	0	0	0	0.886532	1.89474	0.748255	.	-	-
BnaA03g50580D	0.708673	4.78862	0.519891	0	0.0329623	0	-	-	-
BnaA03g52440D	0	0	0	0	0	0.103811	AT4G33270	Transducin family protein / WD-40 repeat family protein	Encodes a CDC20 protein that interacts with APC subunits, components of the mitochondrial checkpoint complex and mitotic cyclin substrates and is indispensable for normal plant development and fertility.
BnaA03g52570D	0.994491	0.577143	0.523936	8.95002	7.26724	7.05699	AT4G33580	beta carbonic anhydrase 5	beta carbonic anhydrase 5 (BCA5); FUNCTIONS IN: carbonate dehydratase activity, zinc ion binding; INVOLVED IN: carbon utilization; LOCATED IN: chloroplast; EXPRESSED IN: 25 plant structures; EXPRESSED DURING: 13 growth stages; CONTAINS InterPro DOMAIN/s: Carbonic anhydrase, prokaryotic-like, conserved site (InterPro:IPR015892), Carbonic anhydrase (InterPro:IPR001765); BEST Arabidopsis thaliana pr…
BnaA03g52650D	9.61646	7.76932	1.70586	1.16641	0.634371	0.122271	AT4G33625	FUNCTIONS IN: molecular_function unknown; INVOLVED IN: biological_process unknown; LOCATED IN: plasma membrane, vacuole; EXPRESSED IN: cultured cell; CONTAINS InterPro DOMAIN/s: Golgi apparatus membrane protein TVP15 (InterPro:IPR013714); Has 59 Blast hits to 59 proteins in 18 species: Archae - 0; Bacteria - 0; Metazoa - 0; Fungi - 0; Plants - 50; Viruses - 0; Other Eukaryotes - 9 (source: NCBI B…	0
BnaA03g52660D	0.000172667	0	0	0	0	0	AT4G33630	Protein of unknown function (DUF3506)	Encodes one of the two plastid proteins EXECUTER (EX1, AT4G33630) and EX2 (AT1G27510). Mediates singlet oxygen induced programmed cell death.
BnaA03g52690D	3.25365	3.70535	3.05885	9.65308	7.28729	8.68313	AT4G33670	NAD(P)-linked oxidoreductase superfamily protein	Encodes a L-galactose dehydrogenase, involved in ascorbate biosynthesis
BnaA03g53510D	0.420728	1.28962	1.10716	1.54284	1.45544	1.4541	AT4G36650	plant-specific TFIIB-related protein	Encodes a protein with similarity to the general transcription factor TFIIB. pBRP binds rDNA sequences in vitro. pBRP has been localized to the outer face of the plastid membrane with GFP fusion however, under conditions of proteosome inhibition it is found in the nucleus.
BnaA03g53920D	2.44623	3.07576	2.44372	0.009111	0.043448	0.0463023	AT4G37410	cytochrome P450, family 81, subfamily F, polypeptide 4	member of CYP81F
BnaA03g54180D	17.8934	11.8679	11.613	0.729626	0.721605	0.896873	AT4G37660	Ribosomal protein L12/ ATP-dependent Clp protease adaptor protein ClpS family protein	Ribosomal protein L12/ ATP-dependent Clp protease adaptor protein ClpS family protein; FUNCTIONS IN: structural constituent of ribosome; INVOLVED IN: translation; LOCATED IN: ribosome, intracellular, large ribosomal subunit; EXPRESSED IN: 20 plant structures; EXPRESSED DURING: 13 growth stages; CONTAINS InterPro DOMAIN/s: Ribosomal protein L12, chloroplast (InterPro:IPR015608), Ribosomal protein …
BnaA03g54420D	6.01576	10.3367	8.75235	0.747887	1.70602	3.02259	AT4G39890	RAB GTPase homolog H1C	RAB GTPase homolog H1C (RABH1c); FUNCTIONS IN: protein binding, GTP binding; INVOLVED IN: protein transport, small GTPase mediated signal transduction; LOCATED IN: endomembrane system; EXPRESSED IN: 9 plant structures; EXPRESSED DURING: 6 growth stages; CONTAINS InterPro DOMAIN/s: Ras GTPase (InterPro:IPR001806), Small GTP-binding protein (InterPro:IPR005225), Small GTPase (InterPro:IPR020851), R…
BnaA03g54480D	0.413596	0.243211	0.526834	0	0	0	-	-	-
BnaA03g54820D	0.771729	0.861586	0.62998	0.078819	0.0586897	0.102575	AT5G02470	Transcription factor DP	core cell cycle genes
BnaA03g55600D	0	0	0	1.47023	1.75825	2.7051	-	-	-
BnaA03g55610D	7.80755	14.0213	6.78672	0.0244867	0	0.0247647	AT5G06870	polygalacturonase inhibiting protein 2	Encodes a polygalacturonase inhibiting protein involved in plant defense response. PGIPs inhibit the activity of pectin degrading enzymes such as those produced by fungal pathogens. PGIP2 is induced by fungal infection and methyl jasmonate.Suppressed in the proton sensitive stop1-mutant, but the transcription level was recovered by transformation of STOP2. Knockout mutant showed severe damage in …
BnaA03g56100D	7.33906	6.83563	6.54407	4.06159	4.62802	2.54344	AT5G20580	BEST Arabidopsis thaliana protein match is: FRIGIDA interacting protein 1 (TAIR:AT2G06005.1); Has 167 Blast hits to 167 proteins in 73 species: Archae - 0; Bacteria - 25; Metazoa - 58; Fungi - 25; Plants - 43; Viruses - 0; Other Eukaryotes - 16 (source: NCBI BLink).	0
BnaA03g56290D	2.31054	1.46862	1.90165	3.56252	2.6662	1.89881	AT5G53045	unknown protein; Has 122 Blast hits to 122 proteins in 57 species: Archae - 0; Bacteria - 0; Metazoa - 46; Fungi - 30; Plants - 41; Viruses - 0; Other Eukaryotes - 5 (source: NCBI BLink).	0
BnaA03g56560D	3.70895	3.49645	2.88283	12.0403	11.9332	7.97802	AT2G39990	eukaryotic translation initiation factor 2	translation initiation factor eIF2 p47 subunit homolog
BnaA03g56640D	14.5728	12.5916	13.4891	2.46835	2.17678	1.98436	AT2G39840	type one serine/threonine protein phosphatase 4	Encodes the catalytic subunit of a Type 1 phosphoprotein Ser/Thr phosphatase, expressed in roots, shoots and flowers.
BnaA03g56660D	0	0.116377	0.0384507	0.0213167	0.0126393	0.00598	AT2G42670	Protein of unknown function (DUF1637)	Protein of unknown function (DUF1637); FUNCTIONS IN: cysteamine dioxygenase activity; INVOLVED IN: oxidation reduction; LOCATED IN: cellular_component unknown; EXPRESSED IN: 24 plant structures; EXPRESSED DURING: 15 growth stages; CONTAINS InterPro DOMAIN/s: Protein of unknown function DUF1637 (InterPro:IPR012864); BEST Arabidopsis thaliana protein match is: Protein of unknown function (DUF1637) …
BnaA03g57380D	0.957706	0.595745	0.123611	3.59001	3.87597	2.5892	-	-	-
BnaA03g57760D	0.0169157	0.0958747	0.0304727	1.70675	6.0816	0.88989	AT3G25240	Protein of unknown function (DUF506)	Protein of unknown function (DUF506) ; CONTAINS InterPro DOMAIN/s: Protein of unknown function DUF506, plant (InterPro:IPR006502); BEST Arabidopsis thaliana protein match is: Protein of unknown function (DUF506) (TAIR:AT3G07350.1); Has 379 Blast hits to 377 proteins in 24 species: Archae - 0; Bacteria - 0; Metazoa - 0; Fungi - 0; Plants - 377; Viruses - 0; Other Eukaryotes - 2 (source: NCBI BLink…
BnaA03g57770D	0.008575	0.342448	0.434401	1.77802	7.72947	1.80982	AT3G25280	Major facilitator superfamily protein	Major facilitator superfamily protein; FUNCTIONS IN: transporter activity; INVOLVED IN: oligopeptide transport; LOCATED IN: membrane; CONTAINS InterPro DOMAIN/s: Oligopeptide transporter (InterPro:IPR000109), Major facilitator superfamily, general substrate transporter (InterPro:IPR016196); BEST Arabidopsis thaliana protein match is: Major facilitator superfamily protein (TAIR:AT3G25260.1); Has 3…
BnaA03g57780D	0	0.0149913	0.067826	0.168585	0.417969	0.123103	-	-	-
BnaA03g58070D	41.1278	12.0412	6.3368	4.8349	0.511857	0.0128227	AT4G17030	expansin-like B1	Encodes EXLB1 (expansin-like B1), a member of the expansin family.
BnaA03g58940D	0	0	0.836952	0	0	0	AT4G28540	casein kinase I-like 6	casein kinase I-like 6 (CKL6); FUNCTIONS IN: protein serine/threonine kinase activity, kinase activity; INVOLVED IN: protein amino acid phosphorylation; LOCATED IN: plasmodesma; EXPRESSED IN: 24 plant structures; EXPRESSED DURING: 15 growth stages; CONTAINS InterPro DOMAIN/s: Protein kinase, ATP binding site (InterPro:IPR017441), Protein kinase, catalytic domain (InterPro:IPR000719), Serine/threo…
BnaA03g58950D	3.49034	3.67712	3.87221	0.000185333	0	0.002132	.	-	-
BnaA03g59660D	0	0	0	2.03171	1.25344	1.24773	-	-	-
BnaA03g59750D	0	0	0	2.65305	1.58482	1.07774	AT1G62120	Mitochondrial transcription termination factor family protein	Mitochondrial transcription termination factor family protein; FUNCTIONS IN: molecular_function unknown; INVOLVED IN: biological_process unknown; LOCATED IN: mitochondrion; CONTAINS InterPro DOMAIN/s: Mitochodrial transcription termination factor-related (InterPro:IPR003690); BEST Arabidopsis thaliana protein match is: Mitochondrial transcription termination factor family protein (TAIR:AT1G62085.…
BnaA03g59950D	3.66363	3.53051	1.58067	0.0425077	0.0101997	0	-	-	-
BnaA03g60050D	0	0	0	0.0659427	0.0897443	0.033587	AT1G61140	SNF2 domain-containing protein / helicase domain-containing protein / zinc finger protein-related	embryo sac development arrest 16 (EDA16); FUNCTIONS IN: helicase activity, DNA binding, zinc ion binding, nucleic acid binding, ATP binding; INVOLVED IN: embryo sac development; EXPRESSED IN: 24 plant structures; EXPRESSED DURING: 15 growth stages; CONTAINS InterPro DOMAIN/s: Zinc finger, RING-type, conserved site (InterPro:IPR017907), Zinc finger, RING-type (InterPro:IPR001841), Zinc finger, C3H…
BnaA03g60140D	0.034631	0	0	0.116434	0.0851117	0.0916467	AT1G61350	ARM repeat superfamily protein	ARM repeat superfamily protein; FUNCTIONS IN: binding; INVOLVED IN: biological_process unknown; LOCATED IN: cellular_component unknown; EXPRESSED IN: 22 plant structures; EXPRESSED DURING: 13 growth stages; CONTAINS InterPro DOMAIN/s: Armadillo-like helical (InterPro:IPR011989), Armadillo (InterPro:IPR000225), Armadillo-type fold (InterPro:IPR016024); BEST Arabidopsis thaliana protein match is: A…
BnaA03g60190D	0	0	0	3.96854	5.34175	1.86575	.	-	-
BnaA03g60380D	0.0518893	0	0.00739067	0.015162	0.117783	0.0201727	AT1G62340	PA-domain containing subtilase family protein	Subtilisin-like serine protease required for epidermal surface formation in embryos and juvenile plants
BnaA03g60670D	0	1.41745	0	5.49148	28.5284	5.607	-	-	-
BnaA04g00710D	0	0.462523	0.730305	0	0	0	AT3G61430	plasma membrane intrinsic protein 1A	a member of the plasma membrane intrinsic protein subfamily PIP1. localizes to the plasma membrane and exhibits water transport activity in Xenopus oocyte. expressed ubiquitously and protein level decreases slightly during leaf development.
BnaA04g00760D	3.81235	3.87986	4.60298	0.314133	0.352242	0.383702	AT3G61320	Bestrophin-like protein	Bestrophin-like protein; CONTAINS InterPro DOMAIN/s: Bestrophin-like (InterPro:IPR021134); BEST Arabidopsis thaliana protein match is: Bestrophin-like protein (TAIR:AT2G45870.1); Has 1448 Blast hits to 1447 proteins in 512 species: Archae - 0; Bacteria - 1140; Metazoa - 0; Fungi - 113; Plants - 120; Viruses - 0; Other Eukaryotes - 75 (source: NCBI BLink).
BnaA04g00870D	0	0.776862	0	45.3145	94.2129	27.3989	AT3G61182	low-molecular-weight cysteine-rich 54	Encodes a member of a family of small,secreted, cysteine rich protein with sequence similarity to the PCP (pollen coat protein) gene family.
BnaA04g04000D	0	1.92886	0.945316	9.27142	27.0761	3.84133	.	-	-
BnaA04g04620D	14.2027	17.9204	16.476	33.8611	36.4423	25.2961	AT3G53610	RAB GTPase homolog 8	GTPase AtRAB8 (atrab8)
BnaA04g04730D	0	0	0	0.0116537	0.127002	0.0267083	AT3G53490	unknown protein; FUNCTIONS IN: molecular_function unknown; INVOLVED IN: biological_process unknown; LOCATED IN: endomembrane system; BEST Arabidopsis thaliana protein match is: unknown protein (TAIR:AT5G02720.1); Has 70 Blast hits to 70 proteins in 13 species: Archae - 0; Bacteria - 0; Metazoa - 0; Fungi - 0; Plants - 70; Viruses - 0; Other Eukaryotes - 0 (source: NCBI BLink).	0
BnaA04g05330D	0	0	0	13.1194	8.84832	3.31823	AT3G52590	ubiquitin extension protein 1	Ubiquitin extension protein
BnaA04g06890D	73.1885	46.1439	52.2211	34.6847	37.6462	35.6859	AT4G13430	isopropyl malate isomerase large subunit 1	Encodes a methylthioalkylmalate isomerase involved in glucosinolate biosynthesis.
BnaA04g06970D	0.00910333	0	0.00404967	0	0	0.0169473	AT4G13350	NSP (nuclear shuttle protein)-interacting GTPase	Encodes a GTPase that interacts with nuclear shuttle proteins (NSPs) from a number of different plant viruses. The gene is widely expressed and NIG transcript levels do not rise in response to viral infection. This cytoplasmic protein does not directly interact with a viral movement protein (MP), but, it does promote the movement of NSP from the nucleus to the cytoplasm. Overexpression of NIG in …
BnaA04g07010D	40.7777	31.4541	20.2207	14.4363	10.0795	5.27292	AT4G13200	unknown protein; FUNCTIONS IN: molecular_function unknown; INVOLVED IN: biological_process unknown; LOCATED IN: thylakoid, chloroplast thylakoid membrane, chloroplast, plastoglobule; EXPRESSED IN: 22 plant structures; EXPRESSED DURING: 13 growth stages; Has 97 Blast hits to 97 proteins in 46 species: Archae - 0; Bacteria - 65; Metazoa - 2; Fungi - 0; Plants - 28; Viruses - 0; Other Eukaryotes - 2…	0
BnaA04g07370D	7.53643	15.4692	18.9308	4.02849	4.75965	17.7143	AT5G35460	unknown protein; CONTAINS InterPro DOMAIN/s: Protein of unknown function DUF2838 (InterPro:IPR021261); Has 1807 Blast hits to 1807 proteins in 277 species: Archae - 0; Bacteria - 0; Metazoa - 736; Fungi - 347; Plants - 385; Viruses - 0; Other Eukaryotes - 339 (source: NCBI BLink).	0
BnaA04g07760D	103.509	116.762	126.445	23.6278	14.8326	91.0659	AT5G36790	Haloacid dehalogenase-like hydrolase (HAD) superfamily protein	Haloacid dehalogenase-like hydrolase (HAD) superfamily protein; FUNCTIONS IN: hydrolase activity, phosphatase activity, phosphoglycolate phosphatase activity; INVOLVED IN: metabolic process; LOCATED IN: apoplast, nucleus, chloroplast stroma, vacuole, cytoplasm; EXPRESSED IN: fruit, guard cell, leaf; EXPRESSED DURING: seedling growth; CONTAINS InterPro DOMAIN/s: HAD-superfamily hydrolase, subfamil…
BnaA04g07880D	0.626402	0.45648	0.649888	0.149417	0.0618303	0.0716763	.	-	-
BnaA04g08700D	10.5739	8.60704	10.547	4.75497	4.88969	6.56501	.	-	-
BnaA04g08730D	9.9996	10.529	9.11806	7.60108	6.42897	5.21923	.	-	-
BnaA04g08760D	4.94833	3.35382	2.9552	2.94658	2.95351	2.60327	AT5G38640	NagB/RpiA/CoA transferase-like superfamily protein	NagB/RpiA/CoA transferase-like superfamily protein; FUNCTIONS IN: GTP binding, translation initiation factor activity; INVOLVED IN: translational initiation, cellular metabolic process; LOCATED IN: eukaryotic translation initiation factor 2B complex; EXPRESSED IN: cultured cell; CONTAINS InterPro DOMAIN/s: Initiation factor 2B related (InterPro:IPR000649); BEST Arabidopsis thaliana protein match …
BnaA04g09750D	0.394879	0.270808	0.584068	1.82379	0.018167	0.789814	AT5G39960	GTP binding;GTP binding	GTP binding;GTP binding; FUNCTIONS IN: GTP binding; LOCATED IN: intracellular; EXPRESSED IN: 21 plant structures; EXPRESSED DURING: 13 growth stages; CONTAINS InterPro DOMAIN/s: GTP-binding, EngA (InterPro:IPR016484), Small GTP-binding protein (InterPro:IPR005225), GTP1/OBG (InterPro:IPR006073), Guanylate kinase (InterPro:IPR008144), GTP-binding protein, HSR1-related (InterPro:IPR002917); BEST Ar…
BnaA04g10030D	6.16473	3.52977	2.91897	1.32026	0.6315	0.686206	AT5G40160	Ankyrin repeat family protein	Encodes ankyrin repeat protein EMB506. Mutations in this locus result in embryo lethality.
BnaA04g10210D	0	0	0	1.58012	1.0456	0.714356	.	-	-
BnaA04g10450D	1.33661	0.966762	0.655322	0.420207	0.526953	0.317955	AT5G40600	unknown protein; FUNCTIONS IN: molecular_function unknown; LOCATED IN: endomembrane system; EXPRESSED IN: 22 plant structures; EXPRESSED DURING: 13 growth stages; BEST Arabidopsis thaliana protein match is: unknown protein (TAIR:AT3G27420.1); Has 1807 Blast hits to 1807 proteins in 277 species: Archae - 0; Bacteria - 0; Metazoa - 736; Fungi - 347; Plants - 385; Viruses - 0; Other Eukaryotes - 339…	0
BnaA04g10620D	10.5971	4.35648	4.03005	2.60208	0.35967	0.275165	AT5G40800	unknown protein; BEST Arabidopsis thaliana protein match is: unknown protein (TAIR:AT3G27250.1); Has 1807 Blast hits to 1807 proteins in 277 species: Archae - 0; Bacteria - 0; Metazoa - 736; Fungi - 347; Plants - 385; Viruses - 0; Other Eukaryotes - 339 (source: NCBI BLink).	0
BnaA04g10930D	0.162616	0.202481	0.208003	3.86433	4.14411	2.88129	.	-	-
BnaA04g11110D	1.35629	0.906437	1.14559	1.88244	3.23091	2.65813	AT5G41370	homolog of xeroderma pigmentosum complementation group B 1	Encodes XPB1, a DNA repair protein and transcription factor. Arabidopsis thaliana has duplicated XPB gene (AtXPB1 and AtXPB2, with high similarity to each other). XPB proteins are involved in both DNA repair and transcription, they are component of the transcription factor IIH (TFIIH) and are responsible for DNA helicase activity during nucleotide (nt) excision repair (NER). Complementation assay…
BnaA04g11290D	0	0.0502787	0	99.1315	117.92	56.252	AT5G41685	Mitochondrial outer membrane translocase complex, subunit Tom7	Mitochondrial outer membrane translocase complex, subunit Tom7; FUNCTIONS IN: protein transporter activity, P-P-bond-hydrolysis-driven protein transmembrane transporter activity; INVOLVED IN: intracellular protein transport; LOCATED IN: mitochondrial outer membrane; EXPRESSED IN: 23 plant structures; EXPRESSED DURING: 13 growth stages; CONTAINS InterPro DOMAIN/s: Mitochondrial outer membrane tran…
BnaA04g11990D	48.3687	52.8953	60.4581	32.1364	24.7493	41.6959	AT2G21160	Translocon-associated protein (TRAP), alpha subunit	Translocon-associated protein (TRAP), alpha subunit; INVOLVED IN: biological_process unknown; LOCATED IN: chloroplast thylakoid membrane, endoplasmic reticulum, plasma membrane, vacuole; EXPRESSED IN: 27 plant structures; EXPRESSED DURING: 15 growth stages; CONTAINS InterPro DOMAIN/s: Translocon-associated protein (TRAP), alpha subunit (InterPro:IPR005595); BEST Arabidopsis thaliana protein match…
BnaA04g12070D	0.0176433	0	0	0	0	0	AT2G21260	NAD(P)-linked oxidoreductase superfamily protein	NAD(P)-linked oxidoreductase superfamily protein; FUNCTIONS IN: oxidoreductase activity; INVOLVED IN: oxidation reduction; CONTAINS InterPro DOMAIN/s: Aldo/keto reductase (InterPro:IPR001395), Aldo/keto reductase subgroup (InterPro:IPR020471), Aldo/keto reductase, conserved site (InterPro:IPR018170); BEST Arabidopsis thaliana protein match is: NAD(P)-linked oxidoreductase superfamily protein (TAI…
BnaA04g12090D	0.437621	0.0365073	0.178285	0.0186167	0.07165	0.294704	AT2G21270	ubiquitin fusion degradation 1	ubiquitin fusion degradation 1 (UFD1); FUNCTIONS IN: molecular_function unknown; INVOLVED IN: ubiquitin-dependent protein catabolic process; EXPRESSED IN: 24 plant structures; EXPRESSED DURING: 13 growth stages; CONTAINS InterPro DOMAIN/s: Ubiquitin fusion degradation protein UFD1 (InterPro:IPR004854); BEST Arabidopsis thaliana protein match is: Ubiquitin fusion degradation UFD1 family protein (T…
BnaA04g12140D	0.105488	0.024185	0.0713053	0.248818	0.28712	0.251944	AT2G21350	RNA-binding CRS1 / YhbY (CRM) domain protein	RNA-binding CRS1 / YhbY (CRM) domain protein; FUNCTIONS IN: RNA binding; INVOLVED IN: biological_process unknown; LOCATED IN: chloroplast; CONTAINS InterPro DOMAIN/s: RNA-binding, CRM domain (InterPro:IPR001890); BEST Arabidopsis thaliana protein match is: RNA-binding CRS1 / YhbY (CRM) domain protein (TAIR:AT4G39040.2); Has 1900 Blast hits to 1900 proteins in 975 species: Archae - 2; Bacteria - 1…
BnaA04g13690D	0.0592953	0.260286	0.016563	2.63006	4.48887	0.743148	AT2G23530	Zinc-finger domain of monoamine-oxidase A repressor R1	Zinc-finger domain of monoamine-oxidase A repressor R1; CONTAINS InterPro DOMAIN/s: Cell division cycle-associated protein (InterPro:IPR018866); BEST Arabidopsis thaliana protein match is: Zinc-finger domain of monoamine-oxidase A repressor R1 (TAIR:AT4G37110.1); Has 512 Blast hits to 506 proteins in 112 species: Archae - 0; Bacteria - 4; Metazoa - 144; Fungi - 73; Plants - 256; Viruses - 0; Othe…
BnaA04g14000D	0.390325	0.219783	0.187742	36.5084	25.8933	13.712	AT2G23930	probable small nuclear ribonucleoprotein G	probable small nuclear ribonucleoprotein G (SNRNP-G); CONTAINS InterPro DOMAIN/s: Like-Sm ribonucleoprotein (LSM) domain (InterPro:IPR001163), Like-Sm ribonucleoprotein (LSM)-related domain (InterPro:IPR010920), Like-Sm ribonucleoprotein (LSM) domain, eukaryotic/archaea-type (InterPro:IPR006649); BEST Arabidopsis thaliana protein match is: Small nuclear ribonucleoprotein family protein (TAIR:AT3G…
BnaA04g14010D	0.439561	0.917096	0.746018	0	0	0	AT2G23945	Eukaryotic aspartyl protease family protein	Eukaryotic aspartyl protease family protein; FUNCTIONS IN: aspartic-type endopeptidase activity; INVOLVED IN: proteolysis; LOCATED IN: endomembrane system; EXPRESSED IN: 16 plant structures; EXPRESSED DURING: 9 growth stages; CONTAINS InterPro DOMAIN/s: Peptidase aspartic (InterPro:IPR021109), Peptidase aspartic, catalytic (InterPro:IPR009007), Peptidase A1 (InterPro:IPR001461); BEST Arabidopsis …
BnaA04g14090D	0.559099	0.71945	1.20187	0.358001	0.673204	0.357271	AT2G24070	Family of unknown function (DUF566)	Family of unknown function (DUF566) ; LOCATED IN: chloroplast; EXPRESSED IN: shoot apex, inflorescence meristem, root, flower, carpel; EXPRESSED DURING: petal differentiation and expansion stage; CONTAINS InterPro DOMAIN/s: Protein of unknown function DUF566 (InterPro:IPR007573); BEST Arabidopsis thaliana protein match is: Family of unknown function (DUF566) (TAIR:AT4G30710.1); Has 35333 Blast hi…
BnaA04g14180D	0	0	0	0.622192	0.619049	0.928988	.	-	-
BnaA04g14230D	1.22718	0.794791	1.07739	0.504427	0.837888	4.07958	AT2G24280	alpha/beta-Hydrolases superfamily protein	alpha/beta-Hydrolases superfamily protein; FUNCTIONS IN: serine-type peptidase activity, serine-type carboxypeptidase activity; INVOLVED IN: proteolysis; LOCATED IN: endomembrane system, lysosome; EXPRESSED IN: 22 plant structures; EXPRESSED DURING: 13 growth stages; CONTAINS InterPro DOMAIN/s: Peptidase S28 (InterPro:IPR008758); BEST Arabidopsis thaliana protein match is: Serine carboxypeptidase…
BnaA04g14750D	3.06064	2.63286	1.72688	0.167439	0.0333927	0.342107	.	-	-
BnaA04g14930D	0.32519	0.412315	0.37101	0	0	0	.	-	-
BnaA04g16100D	1.06841	1.38988	1.73799	3.90884	2.57495	2.53629	AT2G27900	CONTAINS InterPro DOMAIN/s: Protein of unknown function DUF2451, C-terminal (InterPro:IPR019514), Vacuolar protein sorting-associated protein 54 (InterPro:IPR019515); Has 316 Blast hits to 252 proteins in 92 species: Archae - 0; Bacteria - 2; Metazoa - 200; Fungi - 2; Plants - 68; Viruses - 0; Other Eukaryotes - 44 (source: NCBI BLink).	0
BnaA04g16120D	0.12873	0.0716257	0.0616927	1.26627	2.45002	0.710752	-	-	-
BnaA04g16420D	0.101825	1.17963	0.32354	15.8183	15.2266	11.4297	AT2G28370	Uncharacterised protein family (UPF0497)	Uncharacterised protein family (UPF0497); FUNCTIONS IN: molecular_function unknown; INVOLVED IN: biological_process unknown; LOCATED IN: plasma membrane; EXPRESSED IN: 23 plant structures; EXPRESSED DURING: 15 growth stages; CONTAINS InterPro DOMAIN/s: Uncharacterised protein family UPF0497, trans-membrane plant (InterPro:IPR006702); BEST Arabidopsis thaliana protein match is: Uncharacterised pro…
BnaA04g16490D	1.64206	0.513624	0.057781	19.779	11.7887	3.35934	AT2G28570	unknown protein; Has 13 Blast hits to 13 proteins in 6 species: Archae - 0; Bacteria - 0; Metazoa - 0; Fungi - 0; Plants - 13; Viruses - 0; Other Eukaryotes - 0 (source: NCBI BLink).	0
BnaA04g16590D	1.01249	0.49059	0.443211	6.50254	3.94583	11.337	AT2G28660	Chloroplast-targeted copper chaperone protein	Chloroplast-targeted copper chaperone protein; FUNCTIONS IN: copper ion binding, metal ion binding; INVOLVED IN: copper ion transport, metal ion transport; LOCATED IN: chloroplast; EXPRESSED IN: 21 plant structures; EXPRESSED DURING: 13 growth stages; CONTAINS InterPro DOMAIN/s: Heavy metal transport/detoxification protein (InterPro:IPR006121), Copper chaperone, chloroplast-targeted, predicted (I…
BnaA04g16630D	0.508531	8.89688	14.1258	0	0.958033	0.601278	AT2G28760	UDP-XYL synthase 6	UDP-XYL synthase 6 (UXS6); FUNCTIONS IN: coenzyme binding, binding, catalytic activity; INVOLVED IN: cellular metabolic process, nucleotide-sugar metabolic process, metabolic process; LOCATED IN: plasma membrane; EXPRESSED IN: 25 plant structures; EXPRESSED DURING: 13 growth stages; CONTAINS InterPro DOMAIN/s: NAD-dependent epimerase/dehydratase (InterPro:IPR001509), NAD(P)-binding domain (InterP…
BnaA04g17080D	0.19465	0.749273	0	3.17339	2.00835	1.01647	AT2G29340	NAD-dependent epimerase/dehydratase family protein	NAD-dependent epimerase/dehydratase family protein; FUNCTIONS IN: oxidoreductase activity, binding, catalytic activity; INVOLVED IN: oxidation reduction, metabolic process; EXPRESSED IN: 22 plant structures; EXPRESSED DURING: 13 growth stages; CONTAINS InterPro DOMAIN/s: NAD(P)-binding domain (InterPro:IPR016040), Glucose/ribitol dehydrogenase (InterPro:IPR002347), Short-chain dehydrogenase/reduc…
BnaA04g17390D	0	0.0362627	0	0.00113533	0.059496	0.0158667	-	-	-
BnaA04g17550D	0	0.00611867	0	0	0	0	AT2G30470	high-level expression of sugar-inducible gene 2	HSI2 is a member of a novel family of B3 domain proteins with a sequence similar to the ERF-associated amphiphilic repression (EAR) motif. It functions as an active repressor of the Spo minimal promoter (derived from a gene for sweet potato sporamin A1) through the EAR motif. It contains a plant-specific B3 DNA-binding domain. The Arabidopsis genome contains 42 genes with B3 domains which could b…
BnaA04g17640D	0.01331	0.040194	0	1.4322	4.50817	1.89386	.	-	-
BnaA04g18910D	0	0.0671	0	0	0	0	AT2G32650	RmlC-like cupins superfamily protein	RmlC-like cupins superfamily protein; CONTAINS InterPro DOMAIN/s: Cupin, RmlC-type (InterPro:IPR011051), Protein of unknown function DUF861, cupin-3 (InterPro:IPR008579), RmlC-like jelly roll fold (InterPro:IPR014710); BEST Arabidopsis thaliana protein match is: plastid transcriptionally active 18 (TAIR:AT2G32180.1); Has 271 Blast hits to 271 proteins in 67 species: Archae - 0; Bacteria - 110; Me…
BnaA04g19520D	0.343989	0.449347	0.334093	0.155755	0.174164	0.0924927	AT2G33470	glycolipid transfer protein 1	glycolipid transfer protein 1 (GLTP1); FUNCTIONS IN: glycolipid transporter activity, glycolipid binding; INVOLVED IN: glycolipid transport; LOCATED IN: plasma membrane; EXPRESSED IN: 25 plant structures; EXPRESSED DURING: 15 growth stages; CONTAINS InterPro DOMAIN/s: Glycolipid transfer protein, GLTP (InterPro:IPR014830); BEST Arabidopsis thaliana protein match is: Glycolipid transfer protein (G…
BnaA04g19870D	1.90707	3.05137	1.04877	0.143998	0.0796073	0.00703367	AT2G33850	unknown protein; FUNCTIONS IN: molecular_function unknown; INVOLVED IN: biological_process unknown; LOCATED IN: endomembrane system; EXPRESSED IN: 17 plant structures; EXPRESSED DURING: 9 growth stages; BEST Arabidopsis thaliana protein match is: unknown protein (TAIR:AT1G28400.1); Has 3053 Blast hits to 2119 proteins in 133 species: Archae - 6; Bacteria - 52; Metazoa - 135; Fungi - 96; Plants - …	0
BnaA04g20070D	0.730044	0.397264	0.446498	0.515978	0.165782	0.361112	AT2G34260	transducin family protein / WD-40 repeat family protein	Encodes a WDxR motif-containing protein that is required for gametogenesis, seed and endosperm development.
BnaA04g20160D	1.04746	0.462697	1.43694	4.8653	4.29271	12.4737	AT2G34460	NAD(P)-binding Rossmann-fold superfamily protein	NAD(P)-binding Rossmann-fold superfamily protein; FUNCTIONS IN: binding, catalytic activity; INVOLVED IN: metabolic process; LOCATED IN: chloroplast thylakoid membrane, chloroplast, plastoglobule, chloroplast envelope; EXPRESSED IN: 21 plant structures; EXPRESSED DURING: 13 growth stages; CONTAINS InterPro DOMAIN/s: NAD(P)-binding domain (InterPro:IPR016040), NmrA-like (InterPro:IPR008030); BEST …
BnaA04g20170D	0.0850067	0.247451	0.164537	4.92289	6.10264	3.65726	.	-	-
BnaA04g20220D	14.5023	13.807	12.8215	16.672	15.5336	13.9305	AT2G34520	mitochondrial ribosomal protein S14	nuclear-encoded mitochondrial ribosomal protein S14
BnaA04g20410D	9.06748	11.1778	8.2379	11.4307	10.8471	13.943	AT2G34860	DnaJ/Hsp40 cysteine-rich domain superfamily protein	embryo sac development arrest 3 (EDA3); FUNCTIONS IN: unfolded protein binding, heat shock protein binding; INVOLVED IN: megagametogenesis; LOCATED IN: chloroplast thylakoid membrane, chloroplast; EXPRESSED IN: 22 plant structures; EXPRESSED DURING: 13 growth stages; CONTAINS InterPro DOMAIN/s: Heat shock protein DnaJ, cysteine-rich domain (InterPro:IPR001305); Has 773 Blast hits to 773 proteins …
BnaA04g20440D	0.554004	0.390393	1.12532	0.186673	0.0337613	0.0123143	AT2G34940	VACUOLAR SORTING RECEPTOR 5	VACUOLAR SORTING RECEPTOR 5 (VSR5); FUNCTIONS IN: calcium ion binding; INVOLVED IN: protein targeting to vacuole; LOCATED IN: integral to plasma membrane, Golgi transport complex; EXPRESSED IN: 14 plant structures; EXPRESSED DURING: 11 growth stages; CONTAINS InterPro DOMAIN/s: Protease-associated PA (InterPro:IPR003137), EGF-like calcium-binding, conserved site (InterPro:IPR018097), EGF-like cal…
BnaA04g20460D	0.000482	0.00227367	0.00313667	0.0118843	0.00158433	0.0774973	AT2G35010	thioredoxin O1	thioredoxin O1 (TO1); INVOLVED IN: cell redox homeostasis; EXPRESSED IN: 23 plant structures; EXPRESSED DURING: 13 growth stages; CONTAINS InterPro DOMAIN/s: Thioredoxin fold (InterPro:IPR012335), Thioredoxin-like subdomain (InterPro:IPR006662), Thioredoxin, core (InterPro:IPR015467), Thioredoxin-like (InterPro:IPR017936), Thioredoxin domain (InterPro:IPR013766), Thioredoxin-like fold (InterPro:I…
BnaA04g20720D	0.34659	0.215938	0.205784	1.55883	3.95654	1.6124	AT2G35710	Nucleotide-diphospho-sugar transferases superfamily protein	Nucleotide-diphospho-sugar transferases superfamily protein; FUNCTIONS IN: transferase activity, transferring hexosyl groups, transferase activity, transferring glycosyl groups; INVOLVED IN: carbohydrate biosynthetic process, biosynthetic process; LOCATED IN: endomembrane system; EXPRESSED IN: 11 plant structures; EXPRESSED DURING: 7 growth stages; CONTAINS InterPro DOMAIN/s: Glycosyl transferase…
BnaA04g21160D	0.898547	0.628538	0.985833	0.010965	0.015608	0	-	-	-
BnaA04g21460D	0.473649	0.282645	0.301717	36.1459	31.614	22.119	AT2G37480	unknown protein; BEST Arabidopsis thaliana protein match is: unknown protein (TAIR:AT3G53670.2); Has 186 Blast hits to 186 proteins in 35 species: Archae - 0; Bacteria - 2; Metazoa - 14; Fungi - 7; Plants - 154; Viruses - 0; Other Eukaryotes - 9 (source: NCBI BLink).	0
BnaA04g21480D	2.13369	1.69521	1.77322	1.8728	1.78401	1.38813	AT2G37520	Acyl-CoA N-acyltransferase with RING/FYVE/PHD-type zinc finger domain	Acyl-CoA N-acyltransferase with RING/FYVE/PHD-type zinc finger domain; FUNCTIONS IN: DNA binding, zinc ion binding; INVOLVED IN: regulation of transcription, DNA-dependent; LOCATED IN: nucleus; EXPRESSED IN: 23 plant structures; EXPRESSED DURING: 15 growth stages; CONTAINS InterPro DOMAIN/s: Zinc finger, PHD-type, conserved site (InterPro:IPR019786), Zinc finger, PHD-type (InterPro:IPR001965), Zi…
BnaA04g21710D	10.1806	10.8951	9.51568	0	0	0	-	-	-
BnaA04g22020D	2.38356	2.00788	1.83974	0.306839	0.500606	0.221643	AT2G38430	unknown protein; BEST Arabidopsis thaliana protein match is: unknown protein (TAIR:AT3G54310.1); Has 35333 Blast hits to 34131 proteins in 2444 species: Archae - 798; Bacteria - 22429; Metazoa - 974; Fungi - 991; Plants - 531; Viruses - 0; Other Eukaryotes - 9610 (source: NCBI BLink).	0
BnaA04g22630D	2.575	1.6769	1.30717	7.47248	8.33126	4.53303	.	-	-
BnaA04g22710D	8.00154	10.2756	11.7932	8.09424	8.23177	6.65794	AT2G39970	Mitochondrial substrate carrier family protein	Encodes peroxisomal membrane protein 38 (PMP38). Mutation in this protein results in enlargement of peroxisomes. Delivers NAD+ for optimal fatty acid degradation during storage oil mobilization.
BnaA04g22770D	0.431664	0	0	0.104083	0.138415	0.000400333	AT2G39870	unknown protein; BEST Arabidopsis thaliana protein match is: unknown protein (TAIR:AT3G55690.1); Has 73 Blast hits to 71 proteins in 14 species: Archae - 0; Bacteria - 0; Metazoa - 2; Fungi - 2; Plants - 69; Viruses - 0; Other Eukaryotes - 0 (source: NCBI BLink).	0
BnaA04g22860D	2.44499	2.60951	2.14773	18.5024	16.3536	10.6648	AT2G39725	LYR family of Fe/S cluster biogenesis protein	LYR family of Fe/S cluster biogenesis protein; FUNCTIONS IN: catalytic activity; LOCATED IN: mitochondrion; EXPRESSED IN: 23 plant structures; EXPRESSED DURING: 15 growth stages; CONTAINS InterPro DOMAIN/s: Complex 1 LYR protein (InterPro:IPR008011); Has 162 Blast hits to 162 proteins in 89 species: Archae - 0; Bacteria - 0; Metazoa - 39; Fungi - 70; Plants - 45; Viruses - 0; Other Eukaryotes - 8…
BnaA04g22870D	0	0	0	2.54361	2.95273	2.41934	-	-	-
BnaA04g23880D	16.8768	14.8844	17.9901	1.67253	4.43238	0.698721	AT2G41380	S-adenosyl-L-methionine-dependent methyltransferases superfamily protein	S-adenosyl-L-methionine-dependent methyltransferases superfamily protein; FUNCTIONS IN: methyltransferase activity; INVOLVED IN: response to cadmium ion; LOCATED IN: mitochondrion; EXPRESSED IN: 12 plant structures; EXPRESSED DURING: LP.04 four leaves visible, 4 anthesis, petal differentiation and expansion stage; CONTAINS InterPro DOMAIN/s: Methyltransferase type 11 (InterPro:IPR013216); BEST Ar…
BnaA04g24270D	0.775876	0.75479	0.567307	1.97595	2.53127	2.45232	AT2G42040	CONTAINS InterPro DOMAIN/s: WRC (InterPro:IPR014977); Has 219 Blast hits to 219 proteins in 19 species: Archae - 0; Bacteria - 0; Metazoa - 3; Fungi - 0; Plants - 215; Viruses - 0; Other Eukaryotes - 1 (source: NCBI BLink).	0
BnaA04g24380D	0	0.000178	0	0.0197987	0.010376	0.009118	.	-	-
BnaA04g24880D	0.0130413	0.11602	0.0331443	2.90886	5.57867	5.6034	AT2G43160	ENTH/VHS family protein	ENTH/VHS family protein; FUNCTIONS IN: binding; LOCATED IN: plasma membrane; EXPRESSED IN: 24 plant structures; EXPRESSED DURING: 13 growth stages; CONTAINS InterPro DOMAIN/s: Epsin, N-terminal (InterPro:IPR001026), Epsin-like, N-terminal (InterPro:IPR013809), ENTH/VHS (InterPro:IPR008942); BEST Arabidopsis thaliana protein match is: ENTH/VHS family protein (TAIR:AT3G59290.1); Has 18929 Blast hit…
BnaA04g24930D	0	0.896415	0.0267867	116.611	204.143	23.3208	.	-	-
BnaA04g24940D	0	0.184854	0	54.7697	15.7242	1.05136	-	-	-
BnaA04g24950D	0	0.927735	0	33.138	77.8135	11.3455	-	-	-
BnaA04g26170D	0	0	0	1.57493	2.00945	1.84328	-	-	-
BnaA04g27460D	18.0693	23.4604	16.5125	0	0.080046	0	-	-	-
BnaA04g27840D	0	0	0	0.1552	0.219462	0.316026	.	-	-
BnaA04g27890D	1.21086	0.812394	0.951725	0.008009	0.059852	0.00755367	.	-	-
BnaA04g28030D	0.387338	0.468928	0.431628	4.25569	4.23917	2.9227	-	-	-
BnaA04g28050D	1.93542	1.75697	1.44234	0	0.03697	0	-	-	-
BnaA04g28060D	0.837012	0.864742	0.511875	0	0	0	-	-	-
BnaA04g28070D	0.800895	0.631537	0.976651	0.74055	0.358936	0.441743	-	-	-
BnaA04g28540D	2.62952	4.08071	1.45447	29.0631	32.3677	9.19134	AT2G29550	tubulin beta-7 chain	Encodes a beta-tubulin that is expressed in leaves, roots and flowers.
BnaA04g29040D	0.137543	0.0669487	0.0140853	0	0	0	-	-	-
BnaA04g29590D	6.43175	2.06043	3.88093	8.59238	7.72099	3.50254	-	-	-
BnaA05g00250D	0.0813227	1.57926	0.100713	16.7979	54.1409	44.7222	AT2G47750	putative indole-3-acetic acid-amido synthetase GH3.9	Encodes GH3.9, a member of the GH3 family auxin-responsive genes. gh3.9-1 mutants had greater primary root length, increased sensitivity to indole-3-acetic acid (IAA)-mediated root growth inhibition, but no obvious effects on apical dominance or leaf morphology.
BnaA05g00490D	0.14859	0.577035	0.156797	1.99068	10.4802	4.14188	AT2G47480	Protein of unknown function (DUF3511)	Protein of unknown function (DUF3511); CONTAINS InterPro DOMAIN/s: Protein of unknown function DUF3511 (InterPro:IPR021899); BEST Arabidopsis thaliana protein match is: Protein of unknown function (DUF3511) (TAIR:AT3G62640.1); Has 220 Blast hits to 220 proteins in 14 species: Archae - 0; Bacteria - 0; Metazoa - 0; Fungi - 0; Plants - 220; Viruses - 0; Other Eukaryotes - 0 (source: NCBI BLink).
BnaA05g00770D	3.7956	4.32044	8.8874	1.0026	1.361	0.91652	.	-	-
BnaA05g02510D	23.9496	18.5006	23.0147	4.47629	4.64686	6.19173	AT2G41870	Remorin family protein	Remorin family protein; CONTAINS InterPro DOMAIN/s: Remorin, C-terminal (InterPro:IPR005516); BEST Arabidopsis thaliana protein match is: Remorin family protein (TAIR:AT3G57540.1); Has 469 Blast hits to 467 proteins in 36 species: Archae - 0; Bacteria - 7; Metazoa - 9; Fungi - 6; Plants - 437; Viruses - 0; Other Eukaryotes - 10 (source: NCBI BLink).
BnaA05g02780D	24.3449	17.4409	17.3572	1.10987	0.676227	2.01429	.	-	-
BnaA05g03020D	1.52661	0.051317	0.806593	5.38771	3.43546	2.14125	AT2G42810	protein phosphatase 5.2	Encodes a phytochrome-specific type 5 serine/threonine protein phosphatase. It dephosphorylates active Pfr-phytochromes. Controls light signal flux by enhancing phytochrome stability and affinity for a signal transducer. It localizes to the cytoplasm in darkness and in the nucleus in light. The gene is alternately spliced. This variant does not contain membrane domains.
BnaA05g03100D	9.33799	7.33487	7.98326	6.93122	6.58911	5.84156	AT2G42710	Ribosomal protein L1p/L10e family	Ribosomal protein L1p/L10e family; FUNCTIONS IN: structural constituent of ribosome, RNA binding; INVOLVED IN: translation, RNA processing; LOCATED IN: ribosome, intracellular, large ribosomal subunit; EXPRESSED IN: 21 plant structures; EXPRESSED DURING: 13 growth stages; CONTAINS InterPro DOMAIN/s: Ribosomal protein L1 (InterPro:IPR002143), Ribosomal protein L1, bacterial-type (InterPro:IPR00587…
BnaA05g03790D	0.0182233	8.99548	39.3664	0	0	0	AT2G44160	methylenetetrahydrofolate reductase 2	methylenetetrahydrofolate reductase MTHFR2 mRNA, complete
BnaA05g03970D	2.87301	3.61969	4.65465	0.636502	0.589383	0.868984	AT2G44430	DNA-binding bromodomain-containing protein	DNA-binding bromodomain-containing protein; FUNCTIONS IN: DNA binding; EXPRESSED IN: stem, male gametophyte, flower, carpel; EXPRESSED DURING: 4 anthesis, petal differentiation and expansion stage; CONTAINS InterPro DOMAIN/s: SANT, DNA-binding (InterPro:IPR001005), Homeodomain-like (InterPro:IPR009057), Myb, DNA-binding (InterPro:IPR014778), Bromodomain (InterPro:IPR001487), MYB-like (InterPro:IP…
BnaA05g04200D	6.66827	5.58792	5.05533	0	0	0	AT2G44640	FUNCTIONS IN: molecular_function unknown; INVOLVED IN: biological_process unknown; LOCATED IN: mitochondrion, chloroplast, plasma membrane, plastid, chloroplast envelope; EXPRESSED IN: 23 plant structures; EXPRESSED DURING: 13 growth stages; CONTAINS InterPro DOMAIN/s: Protein of unknown function DUF3769 (InterPro:IPR022244); BEST Arabidopsis thaliana protein match is: pigment defective 320 (TAIR…	0
BnaA05g04910D	0	0	0	2.16731	1.78082	2.3106	AT2G45500	AAA-type ATPase family protein	AAA-type ATPase family protein; FUNCTIONS IN: nucleoside-triphosphatase activity, nucleotide binding, ATP binding; EXPRESSED IN: 11 plant structures; EXPRESSED DURING: LP.06 six leaves visible, 4 anthesis, petal differentiation and expansion stage, E expanded cotyledon stage; CONTAINS InterPro DOMAIN/s: ATPase, AAA+ type, core (InterPro:IPR003593), ATPase, AAA-type, core (InterPro:IPR003959), ATP…
BnaA05g05840D	18.8432	39.951	172.416	2.05717	1.89815	252.44	AT2G39730	rubisco activase	Rubisco activase, a nuclear-encoded chloroplast protein that consists of two isoforms arising from alternative splicing in most plants. Required for the light activation of rubisco. Involved in jasmonate-induced leaf senescence.
BnaA05g05890D	0.319468	0.42136	0.545853	0	0	0	.	-	-
BnaA05g06110D	0.445618	0.230565	0.271257	1.23692	0.718889	1.47598	AT2G39130	Transmembrane amino acid transporter family protein	Transmembrane amino acid transporter family protein; FUNCTIONS IN: amino acid transmembrane transporter activity; INVOLVED IN: biological_process unknown; LOCATED IN: plasma membrane; EXPRESSED IN: 24 plant structures; EXPRESSED DURING: 15 growth stages; CONTAINS InterPro DOMAIN/s: Amino acid transporter, transmembrane (InterPro:IPR013057); BEST Arabidopsis thaliana protein match is: Transmembran…
BnaA05g06230D	6.29913	1.55513	2.71289	0.054483	0.067001	0.0301167	.	-	-
BnaA05g06280D	0	0	0	0.0133243	0.011943	0.025744	.	-	-
BnaA05g06800D	17.1723	22.7039	24.096	2.01327	2.22313	2.16756	AT2G37790	NAD(P)-linked oxidoreductase superfamily protein	NAD(P)-linked oxidoreductase superfamily protein; FUNCTIONS IN: oxidoreductase activity; INVOLVED IN: oxidation reduction; LOCATED IN: cytosol, nucleus; EXPRESSED IN: 22 plant structures; EXPRESSED DURING: 14 growth stages; CONTAINS InterPro DOMAIN/s: Aldo/keto reductase (InterPro:IPR001395), Aldo/keto reductase subgroup (InterPro:IPR020471), Aldo/keto reductase, conserved site (InterPro:IPR01817…
BnaA05g06890D	0	6.14585	4.61571	25.726	23.4647	24.9069	AT2G37630	myb-like HTH transcriptional regulator family protein	Encodes a MYB-domain protein involved in specification of the leaf proximodistal axis. Mutation results in lobed and dissected leaves with a characteristic asymmetry. Homologous to the Antirrhinum PHANTASTICA (PHAN) and maize ROUGH SHEATH2 (RS2) genes Asymmetric placement of auxin response at the distal leaf tip precedes visible asymmetric leaf growth. Acts alongside AXR1 to exclude BP expression…
BnaA05g06920D	89.3237	70.7493	57.6328	166.006	120.835	136.031	AT2G37600	Ribosomal protein L36e family protein	Ribosomal protein L36e family protein; FUNCTIONS IN: structural constituent of ribosome; INVOLVED IN: translation; LOCATED IN: ribosome, cytosolic large ribosomal subunit; EXPRESSED IN: 22 plant structures; EXPRESSED DURING: 13 growth stages; CONTAINS InterPro DOMAIN/s: Ribosomal protein L36e (InterPro:IPR000509); BEST Arabidopsis thaliana protein match is: Ribosomal protein L36e family protein (…
BnaA05g07310D	0	0	0	2.06184	0.0131323	0.906105	-	-	-
BnaA05g09450D	3.49356	4.58099	3.79857	0	0	0.0158597	AT2G34390	NOD26-like intrinsic protein 2;1	aquaporin NIP2.1
BnaA05g09500D	0	0	0.154572	0.0335173	0.612974	0.101211	AT2G34360	MATE efflux family protein	MATE efflux family protein; FUNCTIONS IN: antiporter activity, drug transmembrane transporter activity, transporter activity; INVOLVED IN: drug transmembrane transport, transmembrane transport; LOCATED IN: membrane; EXPRESSED IN: stem, inflorescence meristem; CONTAINS InterPro DOMAIN/s: MATE family transporter related protein (InterPro:IPR015521), Multi antimicrobial extrusion protein MatE (Inter…
BnaA05g09540D	34.5746	34.2904	32.6289	14.2023	15.7577	10.5313	AT2G34300	S-adenosyl-L-methionine-dependent methyltransferases superfamily protein	S-adenosyl-L-methionine-dependent methyltransferases superfamily protein; CONTAINS InterPro DOMAIN/s: Protein of unknown function DUF248, methyltransferase putative (InterPro:IPR004159); BEST Arabidopsis thaliana protein match is: S-adenosyl-L-methionine-dependent methyltransferases superfamily protein (TAIR:AT1G29470.2); Has 54799 Blast hits to 24520 proteins in 1584 species: Archae - 172; Bacte…
BnaA05g09710D	0	0	0	0.250233	0.17484	0.133194	AT2G34050	INVOLVED IN: protein complex assembly; LOCATED IN: mitochondrion, chloroplast; EXPRESSED IN: 19 plant structures; EXPRESSED DURING: 9 growth stages; CONTAINS InterPro DOMAIN/s: ATP11 (InterPro:IPR010591); Has 304 Blast hits to 304 proteins in 167 species: Archae - 0; Bacteria - 0; Metazoa - 101; Fungi - 112; Plants - 39; Viruses - 0; Other Eukaryotes - 52 (source: NCBI BLink).	0
BnaA05g09810D	3.49546	3.62907	4.0458	0.926744	1.03686	1.01873	AT2G33845	Nucleic acid-binding, OB-fold-like protein	Nucleic acid-binding, OB-fold-like protein; FUNCTIONS IN: molecular_function unknown; INVOLVED IN: biological_process unknown; LOCATED IN: chloroplast; EXPRESSED IN: 22 plant structures; EXPRESSED DURING: 13 growth stages; CONTAINS InterPro DOMAIN/s: Nucleic acid-binding, OB-fold-like (InterPro:IPR016027), Nucleic acid-binding, OB-fold (InterPro:IPR012340); BEST Arabidopsis thaliana protein match…
BnaA05g10320D	0	0.059698	0	0.581412	0.912082	0.351193	AT2G33290	SU(VAR)3-9 homolog 2	Encodes a SU(VAR)3-9 homolog, a SET domain protein. Known SET domain proteins are involved in epigenetic control of gene expression and act as histone methyltransferases. There are 10 SUVH genes in Arabidopsis and members of this subfamily of the SET proteins have an additional conserved SRA domain. Gene is expressed in rosettes, stems, floral buds, and flowers by RT-PCR.
BnaA05g10620D	0	0.01136	0	0	0	0	.	-	-
BnaA05g10780D	0.343802	2.41545	3.87365	0.117581	0.157354	1.11914	AT2G32290	beta-amylase 6	beta-amylase 6 (BAM6); FUNCTIONS IN: cation binding, beta-amylase activity, catalytic activity; INVOLVED IN: cellulose biosynthetic process, carbohydrate metabolic process, polysaccharide catabolic process; LOCATED IN: chloroplast; EXPRESSED IN: 14 plant structures; EXPRESSED DURING: 8 growth stages; CONTAINS InterPro DOMAIN/s: Glycoside hydrolase, family 14, conserved site (InterPro:IPR018238), …
BnaA05g10820D	0	0.241263	0.0295137	2.14442	4.43393	0.543327	AT2G32370	homeodomain GLABROUS 3	Encodes a homeobox-leucine zipper family protein belonging to the HD-ZIP IV family. Together with ATML1 and PDF2, it is involved in cotyledon development.
BnaA05g11170D	65.9212	48.3151	72.2871	3.90082	5.69562	10.2013	AT2G31790	UDP-Glycosyltransferase superfamily protein	UDP-Glycosyltransferase superfamily protein; FUNCTIONS IN: UDP-glycosyltransferase activity, transferase activity, transferring glycosyl groups; INVOLVED IN: metabolic process; LOCATED IN: cellular_component unknown; EXPRESSED IN: 22 plant structures; EXPRESSED DURING: 13 growth stages; CONTAINS InterPro DOMAIN/s: UDP-glucuronosyl/UDP-glucosyltransferase (InterPro:IPR002213); BEST Arabidopsis tha…
BnaA05g12530D	6.1071	1.31389	23.7296	0.610286	0.216494	2.17158	AT2G29500	HSP20-like chaperones superfamily protein	HSP20-like chaperones superfamily protein; CONTAINS InterPro DOMAIN/s: Heat shock protein Hsp20 (InterPro:IPR002068), HSP20-like chaperone (InterPro:IPR008978); BEST Arabidopsis thaliana protein match is: HSP20-like chaperones superfamily protein (TAIR:AT1G07400.1); Has 6873 Blast hits to 6873 proteins in 1575 species: Archae - 184; Bacteria - 4083; Metazoa - 80; Fungi - 309; Plants - 1622; Virus…
BnaA05g13940D	0.200637	0.321861	0.792574	0.564681	0.765304	0.230826	AT1G55080	MED9; BEST Arabidopsis thaliana protein match is: unknown protein (TAIR:AT1G29580.1); Has 67203 Blast hits to 25757 proteins in 1293 species: Archae - 12; Bacteria - 4374; Metazoa - 24340; Fungi - 7940; Plants - 5927; Viruses - 273; Other Eukaryotes - 24337 (source: NCBI BLink).	0
BnaA05g14420D	0.057777	0	0.010428	0.121055	0.122099	0.0770047	AT1G53490	RING/U-box superfamily protein	Encodes HEI10, a RING finger-containing protein. HEI10 belongs to a group of proteins well conserved among species known as ZMM. Required for class I crossover formation.
BnaA05g15630D	0	0	0	2.24979	2.11592	1.92366	.	-	-
BnaA05g16060D	10.49	18.1103	20.4442	0	0	0.113742	AT1G49660	carboxyesterase 5	Encodes a protein with carboxylesterase whose activity was tested using pNA.
BnaA05g16090D	1.16865	1.79745	1.69442	0.272329	0.0975447	0.215518	AT1G49560	Homeodomain-like superfamily protein	Homeodomain-like superfamily protein; CONTAINS InterPro DOMAIN/s: Homeodomain-like (InterPro:IPR009057), Myb, DNA-binding (InterPro:IPR014778), Myb-like DNA-binding domain, SHAQKYF class (InterPro:IPR006447), HTH transcriptional regulator, Myb-type, DNA-binding (InterPro:IPR017930), Homeodomain-related (InterPro:IPR012287); BEST Arabidopsis thaliana protein match is: myb-like transcription factor…
BnaA05g16240D	0	0	0	4.03672	3.33575	3.05601	.	-	-
BnaA05g16260D	3.85258	5.13895	5.53185	2.8189	3.145	2.2472	AT1G49170	Protein of unknown function (DUF167)	Protein of unknown function (DUF167); CONTAINS InterPro DOMAIN/s: Protein of unknown function DUF167 (InterPro:IPR003746); BEST Arabidopsis thaliana protein match is: Protein of unknown function (DUF167) (TAIR:AT5G63440.3); Has 579 Blast hits to 579 proteins in 252 species: Archae - 16; Bacteria - 317; Metazoa - 105; Fungi - 25; Plants - 60; Viruses - 0; Other Eukaryotes - 56 (source: NCBI BLink).
BnaA05g17060D	0	0	0.00838833	0.735939	0.421495	0.313529	-	-	-
BnaA05g17230D	1.12964	19.1127	37.9161	0	0.0256253	0.076049	AT3G22415	unknown protein; Has 35333 Blast hits to 34131 proteins in 2444 species: Archae - 798; Bacteria - 22429; Metazoa - 974; Fungi - 991; Plants - 531; Viruses - 0; Other Eukaryotes - 9610 (source: NCBI BLink).	0
BnaA05g18050D	0	0	0	0.478413	0.228733	0.032054	.	-	-
BnaA05g18750D	1.91537	0.860558	1.08646	0.163653	0.24666	0.330664	AT3G20300	Protein of unknown function (DUF3537)	Protein of unknown function (DUF3537); CONTAINS InterPro DOMAIN/s: Protein of unknown function DUF3537 (InterPro:IPR021924); BEST Arabidopsis thaliana protein match is: Protein of unknown function (DUF3537) (TAIR:AT1G50630.1); Has 143 Blast hits to 143 proteins in 16 species: Archae - 0; Bacteria - 0; Metazoa - 0; Fungi - 0; Plants - 141; Viruses - 0; Other Eukaryotes - 2 (source: NCBI BLink).
BnaA05g19180D	11.4291	13.0368	14.2698	2.91199	3.10183	3.00775	AT3G19980	flower-specific, phytochrome-associated protein phosphatase 3	Encodes catalytic subunit of serine/threonine protein phosphatase 2A. It can associate with phytochromes A and B in vitro. Mutant plants display an accelerated flowering phenotype.
BnaA05g20210D	0.233642	0.358633	0.442071	0	0	0	-	-	-
BnaA05g20510D	0.177729	0.028554	0.0442587	0	0	0	-	-	-
BnaA05g20660D	4.59573	25.7385	28.0604	7.36546	5.91712	11.073	AT3G19400	Cysteine proteinases superfamily protein	Cysteine proteinases superfamily protein; FUNCTIONS IN: cysteine-type endopeptidase activity, cysteine-type peptidase activity; INVOLVED IN: proteolysis; LOCATED IN: endomembrane system; EXPRESSED IN: 21 plant structures; EXPRESSED DURING: 13 growth stages; CONTAINS InterPro DOMAIN/s: Peptidase C1A, papain (InterPro:IPR013128), Proteinase inhibitor I29, cathepsin propeptide (InterPro:IPR013201), …
BnaA05g20760D	0	0	0	0.034169	0.041838	0.0166653	-	-	-
BnaA05g21130D	4.84022	6.87257	7.84279	0.370557	1.15646	1.1501	AT3G19000	2-oxoglutarate (2OG) and Fe(II)-dependent oxygenase superfamily protein	2-oxoglutarate (2OG) and Fe(II)-dependent oxygenase superfamily protein; FUNCTIONS IN: oxidoreductase activity, acting on paired donors, with incorporation or reduction of molecular oxygen, 2-oxoglutarate as one donor, and incorporation of one atom each of oxygen into both donors, oxidoreductase activity, iron ion binding; INVOLVED IN: oxidation reduction; LOCATED IN: cellular_component unknown; …
BnaA05g22550D	12.4173	9.97045	10.6979	1.99676	2.82445	4.04609	AT3G17700	cyclic nucleotide-binding transporter 1	cyclic nucleotide-binding transporter 1, member of a family of cyclic nucleotide gated channels.
BnaA05g22560D	0.003379	0	0	0.658	0.23092	0.121754	.	-	-
BnaA05g23540D	0.443201	0.119675	0.233088	0	0	0	-	-	-
BnaA05g24880D	0.048458	0	0	0	0	0	AT3G14680	cytochrome P450, family 72, subfamily A, polypeptide 14	putative cytochrome P450
BnaA05g25830D	0.06241	0.067891	0.00658867	0.00446133	0.003235	0.13385	AT3G13470	TCP-1/cpn60 chaperonin family protein	Encodes a subunit of chloroplasts chaperonins that are involved in mediating the folding of newly synthesized, translocated, or stress-denatured proteins. Cpn60 subunits are: Cpn60alpha1 (At2g28000), AtCpn60alpha2 (At5g18820), AtCpn60beta1 (At1g55490), AtCpn60beta2 (At3g13470), AtCpn60beta3 (At5g56500), AtCpn60beta4 (At1g26230).
BnaA05g26230D	0.0817643	0.051256	0.080036	0.0197783	0.0112747	0.00680467	AT3G12980	histone acetyltransferase of the CBP family 5	Encodes an enzyme with histone acetyltransferase activity that can use both H3 and H4 histones as substrates. No single prior lysine acetylation is sufficient to block HAC5 acetylation of the H3 or H4 peptides, suggesting that HAC5 can acetylate any of several lysines present in the peptides. Di-acetylation of both lysines 9 and 14 on the H3 peptide significantly reduces the level of incorporated…
BnaA05g26520D	0	0	0	1.56165	3.35097	1.41192	AT3G12670	CTP synthase family protein	embryo defective 2742 (emb2742); FUNCTIONS IN: CTP synthase activity, catalytic activity; INVOLVED IN: response to cadmium ion, embryo development ending in seed dormancy; LOCATED IN: endomembrane system; EXPRESSED IN: 23 plant structures; EXPRESSED DURING: 13 growth stages; CONTAINS InterPro DOMAIN/s: Glutamine amidotransferase class-I, C-terminal (InterPro:IPR000991), CTP synthase (InterPro:IPR…
BnaA05g27560D	0	0	0	0.272904	0.174403	0.174922	AT3G11480	S-adenosyl-L-methionine-dependent methyltransferases superfamily protein	The gene encodes a SABATH methyltransferase that methylates both salicylic acid and benzoic acid. It is highly expressed in flowers, induced by biotic and abiotic stress and thought to be involved in direct defense mechanism.
BnaA05g30740D	2.13375	3.58432	3.29466	9.13453	8.80983	7.18339	AT3G66654	Cyclophilin-like peptidyl-prolyl cis-trans isomerase family protein	Cyclophilin-like peptidyl-prolyl cis-trans isomerase family protein; FUNCTIONS IN: peptidyl-prolyl cis-trans isomerase activity; INVOLVED IN: protein folding; LOCATED IN: Golgi apparatus, plasma membrane; EXPRESSED IN: guard cell; CONTAINS InterPro DOMAIN/s: Cyclophilin-like (InterPro:IPR015891), Peptidyl-prolyl cis-trans isomerase, cyclophilin-type (InterPro:IPR002130); BEST Arabidopsis thaliana…
BnaA05g30820D	2.6279	5.91441	7.91722	2.40572	1.52994	8.81458	AT3G06550	O-acetyltransferase family protein	Encodes a homolog of the protein Cas1p known to be involved in polysaccharide O-acetylation in Cryptococcus neoformans. Mutants show reduced cell wall polysaccharide acetylation and increased resistance to Botrytis cinerea. The protein is expressed in the Golgi and is involved in the acetylation of xylan during secondary wall biosynthesis.
BnaA05g31050D	0.030623	0.0275433	0.0305467	3.92152	3.15405	0.885606	.	-	-
BnaA05g31390D	0.039806	0.107925	0.127944	0.865087	1.36877	1.13048	AT3G05937	unknown protein; Has 30201 Blast hits to 17322 proteins in 780 species: Archae - 12; Bacteria - 1396; Metazoa - 17338; Fungi - 3422; Plants - 5037; Viruses - 0; Other Eukaryotes - 2996 (source: NCBI BLink).	0
BnaA05g31570D	0.162886	0	0	0.207846	0.142061	0.133509	AT3G05670	RING/U-box protein	RING/U-box protein; FUNCTIONS IN: DNA binding, zinc ion binding; INVOLVED IN: regulation of transcription, DNA-dependent; EXPRESSED IN: 23 plant structures; EXPRESSED DURING: 15 growth stages; CONTAINS InterPro DOMAIN/s: Zinc finger, RING-type, conserved site (InterPro:IPR017907), Zinc finger, RING-type (InterPro:IPR001841), Zinc finger, PHD-type (InterPro:IPR001965), Zinc finger, FYVE/PHD-type (…
BnaA05g31610D	0.014597	0.583785	0	27.9945	32.2244	0.530941	AT3G05600	alpha/beta-Hydrolases superfamily protein	alpha/beta-Hydrolases superfamily protein; FUNCTIONS IN: epoxide hydrolase activity, catalytic activity; EXPRESSED IN: 17 plant structures; EXPRESSED DURING: 13 growth stages; CONTAINS InterPro DOMAIN/s: Epoxide hydrolase-like (InterPro:IPR000639), Alpha/beta hydrolase fold-1 (InterPro:IPR000073); BEST Arabidopsis thaliana protein match is: alpha/beta-Hydrolases superfamily protein (TAIR:AT4G0234…
BnaA05g32410D	0	0	0	4.10203	4.23139	0.816278	AT3G03170	unknown protein; BEST Arabidopsis thaliana protein match is: unknown protein (TAIR:AT5G24890.1); Has 184 Blast hits to 184 proteins in 18 species: Archae - 0; Bacteria - 0; Metazoa - 0; Fungi - 0; Plants - 184; Viruses - 0; Other Eukaryotes - 0 (source: NCBI BLink).	0
BnaA05g33230D	9.50458	6.02932	9.01332	2.22873	0.803434	0.501247	AT3G02910	AIG2-like (avirulence induced gene) family protein	AIG2-like (avirulence induced gene) family protein; CONTAINS InterPro DOMAIN/s: Butirosin biosynthesis, BtrG-like (InterPro:IPR013024), AIG2-like (InterPro:IPR009288); BEST Arabidopsis thaliana protein match is: AIG2-like (avirulence induced gene) family protein (TAIR:AT5G46720.1); Has 320 Blast hits to 319 proteins in 102 species: Archae - 4; Bacteria - 64; Metazoa - 146; Fungi - 0; Plants - 79;…
BnaA05g34380D	16.5263	13.8515	11.4899	7.80739	7.57742	7.23873	-	-	-
BnaA05g34590D	2.67481	1.99067	1.02803	3.98286	0.488612	1.28375	AT2G39445	Phosphatidylinositol N-acetylglucosaminyltransferase, GPI19/PIG-P subunit	Phosphatidylinositol N-acetylglucosaminyltransferase, GPI19/PIG-P subunit; FUNCTIONS IN: molecular_function unknown; INVOLVED IN: biological_process unknown; LOCATED IN: chloroplast; CONTAINS InterPro DOMAIN/s: PIG-P (InterPro:IPR013717), Phosphatidylinositol N-acetylglucosaminyltransferase, GPI19/PIG-P subunit (InterPro:IPR016542); BEST Arabidopsis thaliana protein match is: Phosphatidylinositol…
BnaA05g34600D	0	0	0	6.53031	4.20914	6.3405	AT2G39450	Cation efflux family protein	Encodes a Golgi-localized manganese transporter that is involved in Mn tolerance. When expressed into yeast cells, this gene confer Mn<sup>2+</sup> and Cu<sup>2+</sup> tolerance.
BnaA05g34940D	0.731323	0.222123	0.285895	0	0	0	.	-	-
BnaA05g36600D	7.92464	9.22024	6.20451	0.488917	0.27169	0.135153	AT3G21230	4-coumarate:CoA ligase 5	The gene encodes a 4-coumarate coenzyme A ligase being able to use sinapate as substrate. The catalytic efficiency was in the following (descending) order: p-coumaric acid, caffeic acid, 5-OH-ferulic acid, ferulic acid and sinapic acid. At4CL5 was unable to use cinnamic acid as substrate. Knockout of At4CL5 (4cl5) revealed no effect on syringyl lignin content indicating that the activity observed…
BnaA05g36800D	102.476	99.1808	165.319	6.26173	8.75288	16.3356	AT3G19710	branched-chain aminotransferase4	Belongs to the branched-chain amino acid aminotransferase gene family. Encodes a methionine-oxo-acid transaminase. Involved in the methionine chain elongation pathway that leads to the ultimate biosynthesis of methionine-derived glucosinolates.
BnaA06g00200D	0.00759867	0.007223	0	12.4685	7.71366	7.08054	AT1G55680	Transducin/WD40 repeat-like superfamily protein	Transducin/WD40 repeat-like superfamily protein; CONTAINS InterPro DOMAIN/s: WD40 repeat-like-containing domain (InterPro:IPR011046), WD40 repeat 2 (InterPro:IPR019782), WD40-repeat-containing domain (InterPro:IPR017986), WD40 repeat (InterPro:IPR001680), WD40/YVTN repeat-like-containing domain (InterPro:IPR015943), WD40 repeat, subgroup (InterPro:IPR019781); BEST Arabidopsis thaliana protein mat…
BnaA06g02940D	0.384754	0.243342	0.207672	0.033398	0.0210817	0.016386	.	-	-
BnaA06g02960D	0.980175	0.399708	0.355327	7.37069	10.413	2.64115	AT1G49640	alpha/beta-Hydrolases superfamily protein	alpha/beta-Hydrolases superfamily protein; FUNCTIONS IN: hydrolase activity; INVOLVED IN: metabolic process; LOCATED IN: cellular_component unknown; CONTAINS InterPro DOMAIN/s: Alpha/beta hydrolase fold-3 (InterPro:IPR013094); BEST Arabidopsis thaliana protein match is: alpha/beta-Hydrolases superfamily protein (TAIR:AT1G49650.1); Has 9471 Blast hits to 9453 proteins in 1524 species: Archae - 114…
BnaA06g02970D	0.524976	0.518275	0.143063	6.3495	9.58346	2.70936	AT1G49650	alpha/beta-Hydrolases superfamily protein	alpha/beta-Hydrolases superfamily protein; FUNCTIONS IN: hydrolase activity; INVOLVED IN: metabolic process; EXPRESSED IN: 15 plant structures; EXPRESSED DURING: 10 growth stages; CONTAINS InterPro DOMAIN/s: Alpha/beta hydrolase fold-3 (InterPro:IPR013094); BEST Arabidopsis thaliana protein match is: carboxyesterase 5 (TAIR:AT1G49660.1); Has 9107 Blast hits to 9083 proteins in 1488 species: Archa…
BnaA06g03120D	2.23163	2.89762	2.4095	5.21571	5.26423	4.37365	AT1G49540	elongator protein 2	elongator protein 2 (ELP2); CONTAINS InterPro DOMAIN/s: WD40 repeat 2 (InterPro:IPR019782), WD40 repeat, conserved site (InterPro:IPR019775), WD40 repeat (InterPro:IPR001680), G-protein beta WD-40 repeat, region (InterPro:IPR020472), WD40 repeat-like-containing domain (InterPro:IPR011046), WD40-repeat-containing domain (InterPro:IPR017986), WD40/YVTN repeat-like-containing domain (InterPro:IPR015…
BnaA06g03180D	0	0	0	0.000912333	0.00338133	0	AT1G49340	Phosphatidylinositol 3- and 4-kinase family protein	Encodes a phosphatidylinositol 4-kinase that is expressed in inflorescences and shoots.
BnaA06g03290D	0	0	0	0.347981	0.758641	0.533706	-	-	-
BnaA06g03380D	0.0738217	0.0805647	0.081417	0	0	0	.	-	-
BnaA06g03780D	0	0	0	0.317399	0.299273	0.176125	.	-	-
BnaA06g03870D	16.8498	12.3395	10.572	0.739282	1.37972	1.61394	AT1G48320	Thioesterase superfamily protein	Encodes one of the two functional DHNA-CoA (1,4-dihydroxy-2-naphthoyl-CoA) thioesterases found in Arabidopsis.
BnaA06g04530D	0	5.50294	0.021023	1.8492	36.1781	6.52416	AT1G08065	alpha carbonic anhydrase 5	alpha carbonic anhydrase 5 (ACA5); FUNCTIONS IN: carbonate dehydratase activity, zinc ion binding; INVOLVED IN: one-carbon metabolic process; LOCATED IN: endomembrane system; EXPRESSED IN: petal, leaf whorl, sepal, flower; EXPRESSED DURING: 4 anthesis, petal differentiation and expansion stage; CONTAINS InterPro DOMAIN/s: Carbonic anhydrase, alpha-class, catalytic domain (InterPro:IPR001148), Car…
BnaA06g05380D	0.613131	1.91081	0.501605	1.5936	0.517158	0.579084	AT1G09330	unknown protein; FUNCTIONS IN: molecular_function unknown; INVOLVED IN: biological_process unknown; LOCATED IN: integral to membrane; EXPRESSED IN: 24 plant structures; EXPRESSED DURING: 15 growth stages; CONTAINS InterPro DOMAIN/s: Protein of unknown function DUF846, eukaryotic (InterPro:IPR008564); Has 518 Blast hits to 518 proteins in 206 species: Archae - 0; Bacteria - 0; Metazoa - 193; Fungi…	0
BnaA06g05540D	37.2102	23.2988	20.351	32.9213	34.6858	22.6201	AT1G57720	Translation elongation factor EF1B, gamma chain	Translation elongation factor EF1B, gamma chain; FUNCTIONS IN: copper ion binding, translation elongation factor activity; INVOLVED IN: response to cadmium ion, response to zinc ion; LOCATED IN: cell wall, plasma membrane, vacuole, membrane; EXPRESSED IN: 6 plant structures; EXPRESSED DURING: seedling growth, seed development stages; CONTAINS InterPro DOMAIN/s: Thioredoxin fold (InterPro:IPR01233…
BnaA06g05970D	0	0	0	0.837418	0.310705	0.506216	-	-	-
BnaA06g05980D	0	0	0.006481	0.00584767	0.007832	0.0369873	.	-	-
BnaA06g06030D	12.4333	5.89652	3.46881	14.0501	25.0203	11.8141	.	-	-
BnaA06g06660D	5.01078	6.36374	5.25915	16.47	15.5795	11.2089	AT1G10840	translation initiation factor 3 subunit H1	Encodes eukaryotic initiation factor 3H1 subunit (TIF3H1).
BnaA06g07710D	1.79229	0.768347	0.891701	0	0.306797	0.380636	AT1G13000	Protein of unknown function (DUF707)	Protein of unknown function (DUF707); CONTAINS InterPro DOMAIN/s: Protein of unknown function DUF707 (InterPro:IPR007877); BEST Arabidopsis thaliana protein match is: Protein of unknown function (DUF707) (TAIR:AT3G26440.2); Has 334 Blast hits to 332 proteins in 29 species: Archae - 0; Bacteria - 19; Metazoa - 0; Fungi - 0; Plants - 306; Viruses - 0; Other Eukaryotes - 9 (source: NCBI BLink).
BnaA06g09060D	0.454057	0.610373	1.31617	8.97367	7.59663	5.31527	AT1G14280	phytochrome kinase substrate 2	Encodes phytochrome kinase substrate 2. PKS proteins are critical for hypocotyl phototropism. Forms a complex with Phot1, Phot2 and NPH3.
BnaA06g09220D	0.250323	0.117611	0.139707	1.75218	1.79692	1.20201	AT1G14390	Leucine-rich repeat protein kinase family protein	Leucine-rich repeat protein kinase family protein; FUNCTIONS IN: protein serine/threonine kinase activity, protein kinase activity, ATP binding; INVOLVED IN: transmembrane receptor protein tyrosine kinase signaling pathway, protein amino acid phosphorylation; LOCATED IN: endomembrane system; EXPRESSED IN: inflorescence meristem, root, flower; EXPRESSED DURING: petal differentiation and expansion …
BnaA06g11250D	7.68236	8.22594	7.40998	32.0467	29.8568	24.5002	AT1G16740	Ribosomal protein L20	Ribosomal protein L20; FUNCTIONS IN: structural constituent of ribosome, rRNA binding; INVOLVED IN: translation, ribosome biogenesis; LOCATED IN: ribosome, intracellular; EXPRESSED IN: 22 plant structures; EXPRESSED DURING: 13 growth stages; CONTAINS InterPro DOMAIN/s: Ribosomal protein L20 (InterPro:IPR005813); BEST Arabidopsis thaliana protein match is: ribosomal protein L20 (TAIR:ATCG00660.1);…
BnaA06g11280D	10.8833	8.2249	5.20592	4.71559	4.32418	2.12065	AT1G16810	unknown protein; CONTAINS InterPro DOMAIN/s: Protein of unknown function DUF1754, eukaryotic (InterPro:IPR013865); Has 395 Blast hits to 394 proteins in 162 species: Archae - 0; Bacteria - 0; Metazoa - 181; Fungi - 91; Plants - 65; Viruses - 0; Other Eukaryotes - 58 (source: NCBI BLink).	0
BnaA06g11290D	0.0902163	0.174682	0.141227	1.16238	0.913585	0.635829	-	-	-
BnaA06g11360D	5.79828	9.38952	9.76863	39.0393	46.2914	39.7272	AT1G16890	ubiquitin-conjugating enzyme 36	UBC36/UBC13B encodes a protein that may play a role in DNA damage responses and error-free post-replicative DNA repair. It can bind to the MMZ/UEV1 proteins in vitro.
BnaA06g11370D	2.23729	2.91063	1.57804	9.58648	9.1774	5.82338	AT1G16900	Alg9-like mannosyltransferase family	Encodes the Arabidopsis ortholog of the yeast/human ALG9 catalyzing the luminal addition of two alpha-1,2 Man residues in assembling Glc3Man9GlcNAc2.
BnaA06g11380D	0.650863	0.271626	0.151795	5.44806	4.51513	2.26742	AT1G16920	RAB GTPase homolog A1B	small GTP-binding protein (Rab11)similar to YPT3/RAB11 proteins in yeast and mammals, respectively. YPT3/RAB11 is involved in intracellular protein trafficking.
BnaA06g11670D	2.31451	1.38619	1.62941	0.484697	0.344983	0.45859	AT1G17360	BEST Arabidopsis thaliana protein match is: COP1-interacting protein-related (TAIR:AT1G72410.1); Has 9949 Blast hits to 7480 proteins in 576 species: Archae - 12; Bacteria - 1007; Metazoa - 3636; Fungi - 982; Plants - 444; Viruses - 50; Other Eukaryotes - 3818 (source: NCBI BLink).	0
BnaA06g12260D	0.177962	0.214177	0.0176307	0	0.0743223	0	AT1G18030	Protein phosphatase 2C family protein	Protein phosphatase 2C family protein; FUNCTIONS IN: protein serine/threonine phosphatase activity, catalytic activity; INVOLVED IN: biological_process unknown; LOCATED IN: cellular_component unknown; EXPRESSED IN: 22 plant structures; EXPRESSED DURING: 13 growth stages; CONTAINS InterPro DOMAIN/s: Protein phosphatase 2C-related (InterPro:IPR001932), Protein phosphatase 2C (InterPro:IPR015655), P…
BnaA06g13800D	0	0.398509	0	3.5021	14.9215	0.997285	AT1G19640	jasmonic acid carboxyl methyltransferase	Encodes a S-adenosyl-L-methionine:jasmonic acid carboxyl methyltransferase that catalyzes the formation of methyljasmonate from jasmonic acid. Its expression is induced in response to wounding or methyljasmonate treatment.
BnaA06g14200D	1.75652	1.01684	1.30031	0	0	0.009407	AT1G20050	C-8,7 sterol isomerase	C-8 sterol isomerase that also plays a role in miRNA function.
BnaA06g14210D	5.10739	5.28096	4.22825	0.230391	0.136163	0.195686	AT1G20065	FUNCTIONS IN: molecular_function unknown; INVOLVED IN: biological_process unknown; LOCATED IN: endomembrane system; BEST Arabidopsis thaliana protein match is: TFIIB zinc-binding protein (TAIR:AT3G25940.1).	0
BnaA06g15600D	0.00421367	0	0	0.0116417	0.000199	0	AT3G49725	GTP-binding protein, HflX	GTP-binding protein, HflX; FUNCTIONS IN: GTP binding; LOCATED IN: intracellular, chloroplast; CONTAINS InterPro DOMAIN/s: GTP1/OBG (InterPro:IPR006073), GTP-binding protein, HflX (InterPro:IPR016496), GTP-binding protein, HSR1-related (InterPro:IPR002917); BEST Arabidopsis thaliana protein match is: GTP-binding protein, HflX (TAIR:AT5G57960.1); Has 11258 Blast hits to 11241 proteins in 2608 speci…
BnaA06g15690D	0	0.000917667	0.348781	3.27478	3.00426	2.86942	AT3G49645	unknown protein; FUNCTIONS IN: molecular_function unknown; INVOLVED IN: biological_process unknown; LOCATED IN: cellular_component unknown; Has 30201 Blast hits to 17322 proteins in 780 species: Archae - 12; Bacteria - 1396; Metazoa - 17338; Fungi - 3422; Plants - 5037; Viruses - 0; Other Eukaryotes - 2996 (source: NCBI BLink).	0
BnaA06g16010D	0	0	0	1.55345	1.32495	0.902575	-	-	-
BnaA06g16450D	0.0802717	0.0194977	0.060401	0	0	0	.	-	-
BnaA06g16690D	0	0	0	1.50039	1.29546	0.830619	-	-	-
BnaA06g16890D	2.4482	2.40736	2.51924	6.83565	7.98091	6.65955	AT3G48120	unknown protein; Has 22990 Blast hits to 12942 proteins in 666 species: Archae - 8; Bacteria - 739; Metazoa - 13803; Fungi - 2465; Plants - 1363; Viruses - 116; Other Eukaryotes - 4496 (source: NCBI BLink).	0
BnaA06g17080D	0.15546	0.0429987	0.0214087	0.272719	0.350779	0.425259	.	-	-
BnaA06g17310D	0.60707	0.47555	0.493043	4.0233	2.65777	4.28221	AT3G47590	alpha/beta-Hydrolases superfamily protein	alpha/beta-Hydrolases superfamily protein; CONTAINS InterPro DOMAIN/s: BAAT/Acyl-CoA thioester hydrolase C-terminal (InterPro:IPR014940); BEST Arabidopsis thaliana protein match is: alpha/beta-Hydrolases superfamily protein (TAIR:AT1G29840.1); Has 4006 Blast hits to 4003 proteins in 1107 species: Archae - 84; Bacteria - 2507; Metazoa - 7; Fungi - 75; Plants - 235; Viruses - 7; Other Eukaryotes - …
BnaA06g17410D	0	0	0	0.682669	0.831279	0.663943	-	-	-
BnaA06g17710D	26.3136	22.6259	10.8711	6.79417	3.35448	1.70229	AT3G46970	alpha-glucan phosphorylase 2	Encodes a cytosolic alpha-glucan phosphorylase. In vitro, the enzyme has a preference for branched polysaccharides, such as glycogen.
BnaA06g17930D	1.15758	1.03197	0.73609	0	0.036977	0.028027	AT3G46720	UDP-Glycosyltransferase superfamily protein	UDP-Glycosyltransferase superfamily protein; FUNCTIONS IN: transferase activity, transferring hexosyl groups, UDP-glycosyltransferase activity, transferase activity, transferring glycosyl groups; INVOLVED IN: metabolic process; LOCATED IN: cellular_component unknown; EXPRESSED IN: leaf whorl, hypocotyl, root, flower; EXPRESSED DURING: 4 anthesis, petal differentiation and expansion stage; CONTAIN…
BnaA06g18010D	1.07346	4.06337	3.14181	1.63369	9.73454	3.19679	AT3G46540	ENTH/VHS family protein	ENTH/VHS family protein; FUNCTIONS IN: binding; INVOLVED IN: biological_process unknown; LOCATED IN: cellular_component unknown; EXPRESSED IN: 22 plant structures; EXPRESSED DURING: 13 growth stages; CONTAINS InterPro DOMAIN/s: Epsin, N-terminal (InterPro:IPR001026), Epsin-like, N-terminal (InterPro:IPR013809), ENTH/VHS (InterPro:IPR008942); BEST Arabidopsis thaliana protein match is: ENTH/VHS fa…
BnaA06g18120D	0.159251	0.207869	0.168761	0.177962	0.076579	0.0489643	AT3G46210	Ribosomal protein S5 domain 2-like superfamily protein	Ribosomal protein S5 domain 2-like superfamily protein; FUNCTIONS IN: 3'-5'-exoribonuclease activity, RNA binding; INVOLVED IN: RNA processing; LOCATED IN: cellular_component unknown; EXPRESSED IN: 20 plant structures; EXPRESSED DURING: 13 growth stages; CONTAINS InterPro DOMAIN/s: Exoribonuclease, phosphorolytic domain 1 (InterPro:IPR001247), Ribosomal protein S5 domain 2-type fold (InterPro:IPR…
BnaA06g18180D	0.40402	0.358515	0.399219	1.26661	0.836859	0.287894	.	-	-
BnaA06g18220D	0.0625627	0	0.246223	2.14215	2.84111	3.23606	AT3G46060	RAB GTPase homolog 8A	small GTP-binding protein (ara-3)
BnaA06g18330D	0	0	0	0	0.0317287	0.05019	-	-	-
BnaA06g18390D	0.839393	0.697166	0.607152	2.5288	2.20602	2.41146	AT3G45760	Nucleotidyltransferase family protein	Nucleotidyltransferase family protein; BEST Arabidopsis thaliana protein match is: Nucleotidyltransferase family protein (TAIR:AT3G45750.1); Has 1383 Blast hits to 1289 proteins in 203 species: Archae - 0; Bacteria - 1; Metazoa - 707; Fungi - 279; Plants - 174; Viruses - 0; Other Eukaryotes - 222 (source: NCBI BLink).
BnaA06g18460D	0.009929	0	0	0.0755673	0.00383	0	AT3G45630	RNA binding (RRM/RBD/RNP motifs) family protein	RNA binding (RRM/RBD/RNP motifs) family protein; FUNCTIONS IN: RNA binding, zinc ion binding, nucleotide binding, nucleic acid binding; EXPRESSED IN: 23 plant structures; EXPRESSED DURING: 13 growth stages; CONTAINS InterPro DOMAIN/s: RNA recognition motif, RNP-1 (InterPro:IPR000504), Zinc finger, RING-type (InterPro:IPR001841), Nucleotide-binding, alpha-beta plait (InterPro:IPR012677); BEST Arab…
BnaA06g18610D	0	0	0	6.50438	3.85056	3.08569	AT3G45020	Ribosomal L18p/L5e family protein	Ribosomal L18p/L5e family protein; FUNCTIONS IN: structural constituent of ribosome; INVOLVED IN: translation; LOCATED IN: ribosome, intracellular; CONTAINS InterPro DOMAIN/s: Ribosomal protein L18/L5 (InterPro:IPR005484); Has 362 Blast hits to 362 proteins in 135 species: Archae - 0; Bacteria - 259; Metazoa - 0; Fungi - 0; Plants - 68; Viruses - 0; Other Eukaryotes - 35 (source: NCBI BLink).
BnaA06g18740D	0	0	0	0.173053	0.0657073	0.0251353	-	-	-
BnaA06g18900D	3.3757	2.24042	0.175318	23.1178	32.8083	1.80081	AT3G48460	GDSL-like Lipase/Acylhydrolase superfamily protein	GDSL-motif esterase/acyltransferase/lipase. Enzyme group with broad substrate specificity that may catalyze acyltransfer or hydrolase reactions with lipid and non-lipid substrates.
BnaA06g19120D	17.8914	15.6597	13.7438	0.0205613	0.17032	0.179399	AT3G48890	membrane-associated progesterone binding protein 3	putative progesterone-binding protein homolog (Atmp2) mRNA,
BnaA06g19200D	1.86573	1.36027	1.02047	13.1016	10.5601	6.77082	AT3G49100	Signal recognition particle, SRP9/SRP14 subunit	Signal recognition particle, SRP9/SRP14 subunit; FUNCTIONS IN: 7S RNA binding, signal recognition particle binding; INVOLVED IN: negative regulation of translational elongation, SRP-dependent cotranslational protein targeting to membrane; LOCATED IN: signal recognition particle; EXPRESSED IN: 23 plant structures; EXPRESSED DURING: 13 growth stages; CONTAINS InterPro DOMAIN/s: Signal recognition p…
BnaA06g19500D	1.48354	0.946333	1.47511	0.226889	0.031842	0.130293	-	-	-
BnaA06g20020D	0	0	0	0.053942	0.106862	0.071164	.	-	-
BnaA06g20790D	0	0.051599	0	26.6895	27.9689	19.0635	AT3G48180	unknown protein; BEST Arabidopsis thaliana protein match is: unknown protein (TAIR:AT1G19020.1); Has 84 Blast hits to 84 proteins in 15 species: Archae - 0; Bacteria - 0; Metazoa - 0; Fungi - 0; Plants - 84; Viruses - 0; Other Eukaryotes - 0 (source: NCBI BLink).	0
BnaA06g20890D	0	0	0	3.80978	3.07732	1.7376	-	-	-
BnaA06g21030D	0.140929	0.068102	0.0489103	0.0195983	0.027428	0.0131257	AT3G49430	SER/ARG-rich protein 34A	Barta et al (2010) have proposed a nomenclature for Serine/Arginine-Rich Protein Splicing Factors (SR proteins): Plant Cell. 2010, 22:2926.
BnaA06g21130D	0	0	0	0.182874	0.130882	0.301194	AT3G49600	ubiquitin-specific protease 26	Encodes a ubiquitin-specific protease which catalyzes deubiquitination of histone H2B and is required for heterochromatin silencing.Loss of function mutations display autonomous endosperm development and embryo arrest. Loss of function also results in an increase in expression of the PcG complex target gene PHE1.
BnaA06g21190D	0	0	0	1.47745	1.81452	1.28366	AT3G49645	unknown protein; FUNCTIONS IN: molecular_function unknown; INVOLVED IN: biological_process unknown; LOCATED IN: cellular_component unknown; Has 30201 Blast hits to 17322 proteins in 780 species: Archae - 12; Bacteria - 1396; Metazoa - 17338; Fungi - 3422; Plants - 5037; Viruses - 0; Other Eukaryotes - 2996 (source: NCBI BLink).	0
BnaA06g21890D	13.5978	14.2078	18.3288	7.4632	11.259	7.08972	AT5G62460	RING/FYVE/PHD zinc finger superfamily protein	RING/FYVE/PHD zinc finger superfamily protein; FUNCTIONS IN: zinc ion binding; EXPRESSED IN: 23 plant structures; EXPRESSED DURING: 15 growth stages; CONTAINS InterPro DOMAIN/s: Protein of unknown function DUF3675 (InterPro:IPR022143), Zinc finger, C3HC4 RING-type (InterPro:IPR018957), Zinc finger, RING-CH-type (InterPro:IPR011016); BEST Arabidopsis thaliana protein match is: RING/FYVE/PHD zinc f…
BnaA06g22020D	0.0416203	0	0.0528127	0	0	0	.	-	-
BnaA06g22040D	1.31804	3.07187	1.27269	0.94559	1.01986	0.250613	AT5G62530	aldehyde dehydrogenase 12A1	Encodes mitochondrial Delta-pyrroline-5- carboxylate dehydrogenase. Involved in the catabolism of proline to glutamate. Involved in protection from proline toxicity. Induced at pathogen infection sites. P5CDH and SRO5 (an overlapping gene in the sense orientation) generate 24-nt and 21-nt siRNAs, which together are components of a regulatory loop controlling reactive oxygen species (ROS) producti…
BnaA06g22790D	0.240777	0.082076	0.209305	0.023883	0.0554847	0.059267	AT5G63640	ENTH/VHS/GAT family protein	ENTH/VHS/GAT family protein; FUNCTIONS IN: protein transporter activity; INVOLVED IN: intracellular protein transport, intra-Golgi vesicle-mediated transport; LOCATED IN: Golgi stack, plasma membrane; EXPRESSED IN: 23 plant structures; EXPRESSED DURING: 13 growth stages; CONTAINS InterPro DOMAIN/s: VHS (InterPro:IPR002014), GAT (InterPro:IPR004152), ENTH/VHS (InterPro:IPR008942); BEST Arabidopsis…
BnaA06g23050D	10.0281	17.3617	16.3059	29.4468	37.7662	28.1318	AT5G63910	farnesylcysteine lyase	Encodes a farnesylcysteine lyase (EC 1.8.3.5) involved in a salvage /detoxification pathway of farnesylcysteine (FC) residues that are liberated during the degradation of prenylated proteins. Because FC is a competitive inhibitor of prenylcysteine methyltransferases involved in the down-regulation of ABA signaling, fcly mutants with elevated FC levels are hypersensitive to ABA. The protein also a…
BnaA06g23480D	6.47031	7.79862	7.27484	5.98889	7.31226	2.65165	AT5G64500	Major facilitator superfamily protein	Major facilitator superfamily protein; FUNCTIONS IN: molecular_function unknown; INVOLVED IN: transmembrane transport; LOCATED IN: membrane; EXPRESSED IN: 24 plant structures; EXPRESSED DURING: 15 growth stages; CONTAINS InterPro DOMAIN/s: Major facilitator superfamily (InterPro:IPR020846), Major facilitator superfamily MFS-1 (InterPro:IPR011701), Major facilitator superfamily, general substrate …
BnaA06g23700D	10.4885	8.80753	5.82184	4.40924	4.47643	2.49591	AT5G64740	cellulose synthase 6	Encodes a cellulose synthase isomer. CESA6 mutants have cellulose defect in the primary cell wall. Multiple lines of evidence suggest that CESA6, along with CESA1 and CESA3 are present in the same plasma membrane complex for cellulose biosynthesis. CESA2 and CESA5 are related to CESA6, having partially redundant roles. As inferred from the null role of secondary wall-type CesAs, included in a set…
BnaA06g24050D	5.64472	4.24751	6.02045	0	0	0	AT5G65120	unknown protein; BEST Arabidopsis thaliana protein match is: unknown protein (TAIR:AT5G10110.1); Has 30201 Blast hits to 17322 proteins in 780 species: Archae - 12; Bacteria - 1396; Metazoa - 17338; Fungi - 3422; Plants - 5037; Viruses - 0; Other Eukaryotes - 2996 (source: NCBI BLink).	0
BnaA06g24930D	3.05426	5.88529	1.18812	14.2998	27.7481	12.4426	AT5G67600	unknown protein; LOCATED IN: plasma membrane; EXPRESSED IN: 22 plant structures; EXPRESSED DURING: 13 growth stages; BEST Arabidopsis thaliana protein match is: unknown protein (TAIR:AT3G49845.1); Has 30201 Blast hits to 17322 proteins in 780 species: Archae - 12; Bacteria - 1396; Metazoa - 17338; Fungi - 3422; Plants - 5037; Viruses - 0; Other Eukaryotes - 2996 (source: NCBI BLink).	0
BnaA06g25280D	0	0.00674033	0.0163973	0	0	0	AT2G18330	AAA-type ATPase family protein	AAA-type ATPase family protein; FUNCTIONS IN: nucleoside-triphosphatase activity, ATPase activity, nucleotide binding, ATP binding; EXPRESSED IN: 23 plant structures; EXPRESSED DURING: 13 growth stages; CONTAINS InterPro DOMAIN/s: ATPase, AAA-type, core (InterPro:IPR003959), ATPase, AAA+ type, core (InterPro:IPR003593), ATPase, AAA-type, conserved site (InterPro:IPR003960), Protein of unknown fun…
BnaA06g25300D	4.12175	3.47313	3.20919	0.687358	0.0348663	0.767191	AT2G18328	RAD-like 4	RAD-like 4 (RL4); FUNCTIONS IN: DNA binding; EXPRESSED IN: rosette leaf; CONTAINS InterPro DOMAIN/s: SANT, DNA-binding (InterPro:IPR001005), Molecular chaperone, heat shock protein, Hsp40, DnaJ (InterPro:IPR015609), Homeodomain-like (InterPro:IPR009057), Myb, DNA-binding (InterPro:IPR014778), SANT, eukarya (InterPro:IPR017884); BEST Arabidopsis thaliana protein match is: RAD-like 1 (TAIR:AT4G3925…
BnaA06g28320D	0	0	0	5.3065	5.87416	6.40578	-	-	-
BnaA06g28650D	0	0	0	0.130874	0.029826	0.0805717	AT5G27620	cyclin H;1	core cell cycle genes
BnaA06g28690D	0.149395	0	0.149944	1.822	0.282902	0.255366	AT5G27540	MIRO-related GTP-ase 1	Encodes a protein with similarity to GTPases that is localized to the mitochondrion. Involved in embryogenesis, pollen tube growth and required for mitochondrial development.
BnaA06g29030D	0.51427	0.28803	0.174582	3.27157	2.96751	1.85183	AT5G27990	Pre-rRNA-processing protein TSR2, conserved region	Pre-rRNA-processing protein TSR2, conserved region; CONTAINS InterPro DOMAIN/s: Pre-rRNA-processing protein TSR2, conserved region (InterPro:IPR019398); BEST Arabidopsis thaliana protein match is: Pre-rRNA-processing protein TSR2, conserved region (TAIR:AT3G22510.1); Has 1807 Blast hits to 1807 proteins in 277 species: Archae - 0; Bacteria - 0; Metazoa - 736; Fungi - 347; Plants - 385; Viruses - …
BnaA06g29800D	0.222372	0.309061	0.236296	6.19211	14.1503	9.57684	AT5G48950	Thioesterase superfamily protein	Encodes one of the two functional DHNA-CoA (1,4-dihydroxy-2-naphthoyl-CoA) thioesterases found in Arabidopsis.
BnaA06g29810D	0	0.108865	0	21.3102	121.054	3.51954	AT5G48945	low-molecular-weight cysteine-rich 46	Encodes a member of a family of small,secreted, cysteine rich protein with sequence similarity to the PCP (pollen coat protein) gene family.
BnaA06g29970D	5.60684	6.2197	8.29525	3.55485	1.75574	11.1435	AT5G48790	Domain of unknown function (DUF1995)	FUNCTIONS IN: molecular_function unknown; INVOLVED IN: biological_process unknown; LOCATED IN: chloroplast; EXPRESSED IN: 22 plant structures; EXPRESSED DURING: 13 growth stages; CONTAINS InterPro DOMAIN/s: Domain of unknown function DUF1995 (InterPro:IPR018962); BEST Arabidopsis thaliana protein match is: Low PSII Accumulation 3 (TAIR:AT1G73060.1); Has 30201 Blast hits to 17322 proteins in 780 s…
BnaA06g31840D	0.109494	0.032663	0.0534853	22.0405	9.06775	51.9662	AT3G27850	ribosomal protein L12-C	50S ribosomal protein L12-C
BnaA06g32100D	0.008677	0.0330477	0.0102487	0.101847	0	0.150071	.	-	-
BnaA06g32120D	16.2137	15.7274	13.8044	6.09344	6.4661	4.18844	AT3G27430	N-terminal nucleophile aminohydrolases (Ntn hydrolases) superfamily protein	Encodes 20S proteasome beta subunit PBB1 (PBB1).
BnaA06g32520D	3.88062	3.56182	3.17343	0.978564	0.777828	0.684292	AT3G26990	ENTH/VHS family protein	ENTH/VHS family protein; FUNCTIONS IN: molecular_function unknown; INVOLVED IN: biological_process unknown; LOCATED IN: endomembrane system; EXPRESSED IN: 24 plant structures; EXPRESSED DURING: 13 growth stages; CONTAINS InterPro DOMAIN/s: Protein of unknown function DUF618 (InterPro:IPR006903), RNA polymerase II, large subunit, CTD (InterPro:IPR006569), ENTH/VHS (InterPro:IPR008942); BEST Arabid…
BnaA06g32650D	0.158676	0.583959	0.384406	1.82224	6.87192	3.57685	.	-	-
BnaA06g32910D	2.5754	2.26076	2.33033	6.1e-05	0.153306	0.991503	AT3G26420	RNA-binding (RRM/RBD/RNP motifs) family protein with retrovirus zinc finger-like domain	Zinc finger-containing glycine-rich RNA-binding protein. Cold-inducible. Contributes to the enhancement of freezing tolerance. Members of this protein family include AT3G26420 (ATRZ-1A), AT1G60650 (AtRZ-1b) and AT5G04280 (AtRZ-1c).
BnaA06g33370D	0.571385	0.58949	0.728813	0.480356	0.228789	0.302737	-	-	-
BnaA06g33690D	4.92232	7.15374	7.82531	0.622189	0.41825	1.25287	AT2G03390	uvrB/uvrC motif-containing protein	uvrB/uvrC motif-containing protein; FUNCTIONS IN: DNA binding, nuclease activity; INVOLVED IN: nucleotide-excision repair; LOCATED IN: chloroplast; EXPRESSED IN: 25 plant structures; EXPRESSED DURING: 15 growth stages; CONTAINS InterPro DOMAIN/s: Hemimethylated DNA-binding domain (InterPro:IPR011722), UvrB/UvrC protein (InterPro:IPR001943); Has 35333 Blast hits to 34131 proteins in 2444 species: …
BnaA06g33900D	0.388823	0.172165	0.236345	18.7856	10.3463	9.49351	AT2G02990	ribonuclease 1	Encodes a member of the ribonuclease T2 family that responds to inorganic phosphate starvation, and inhibits production of anthocyanin. Also involved in wound-induced signaling independent of jasmonic acid. Its expression is responsive to both phosphate (Pi) and phosphite (Phi) in roots.
BnaA06g34180D	0	0	0	3.88325	4.88404	3.26485	AT2G02360	phloem protein 2-B10	Encodes an F-box protein containing a Nictaba-related lectin domain that can act as a carbohydrate-binding protein.
BnaA06g35060D	0.0848937	0.133677	0.0577697	0	0.0410477	0.0341763	AT2G01220	Nucleotidylyl transferase superfamily protein	Nucleotidylyl transferase superfamily protein; FUNCTIONS IN: nucleotidyltransferase activity; INVOLVED IN: biosynthetic process; LOCATED IN: chloroplast envelope; EXPRESSED IN: 23 plant structures; EXPRESSED DURING: 13 growth stages; CONTAINS InterPro DOMAIN/s: Rossmann-like alpha/beta/alpha sandwich fold (InterPro:IPR014729), Cytidylyltransferase (InterPro:IPR004820); BEST Arabidopsis thaliana p…
BnaA06g35480D	3.09738	3.42504	2.82088	6.65732	5.58267	3.92974	AT5G47520	RAB GTPase homolog A5A	RAB GTPase homolog A5A (RABA5a); FUNCTIONS IN: GTP binding; INVOLVED IN: protein transport, small GTPase mediated signal transduction; LOCATED IN: plasma membrane; EXPRESSED IN: 25 plant structures; EXPRESSED DURING: 15 growth stages; CONTAINS InterPro DOMAIN/s: Ras GTPase (InterPro:IPR001806), Small GTP-binding protein (InterPro:IPR005225), Small GTPase (InterPro:IPR020851), Ras (InterPro:IPR013…
BnaA06g36690D	0	0	0	19.5352	17.0414	13.068	.	-	-
BnaA06g38030D	0	0	0	0	0	0.00105433	AT1G09970	Leucine-rich receptor-like protein kinase family protein	RLK7 belongs to a leucine-rich repeat class of receptor-likekinase (LRR-RLKs). It is involved in the control of germination speed and the tolerance to oxidant stress.
BnaA06g39510D	0.090851	0.357845	0.251917	0.669642	0.957249	0.189402	-	-	-
BnaA06g39530D	6.54727	11.1979	6.55879	0	0.394802	0.320919	AT5G26320	TRAF-like family protein	TRAF-like family protein; FUNCTIONS IN: molecular_function unknown; INVOLVED IN: biological_process unknown; LOCATED IN: endomembrane system; CONTAINS InterPro DOMAIN/s: TRAF-like (InterPro:IPR008974), MATH (InterPro:IPR002083); BEST Arabidopsis thaliana protein match is: TRAF-like family protein (TAIR:AT5G26280.1); Has 1807 Blast hits to 1807 proteins in 277 species: Archae - 0; Bacteria - 0; Me…
BnaA07g02360D	0	0	0	2.76937	3.46821	3.04597	-	-	-
BnaA07g03250D	0.73633	0.0966533	0.141577	0.374153	0.162496	0.056492	AT2G16990	Major facilitator superfamily protein	Major facilitator superfamily protein; FUNCTIONS IN: tetracycline transporter activity; INVOLVED IN: transmembrane transport; LOCATED IN: endomembrane system; EXPRESSED IN: 22 plant structures; EXPRESSED DURING: 13 growth stages; CONTAINS InterPro DOMAIN/s: Major facilitator superfamily MFS-1 (InterPro:IPR011701), Major facilitator superfamily, general substrate transporter (InterPro:IPR016196); …
BnaA07g03480D	1.57853	1.60093	1.45944	0	0	0	-	-	-
BnaA07g03870D	0	1.35864	0	1.60925	191.409	9.91992	.	-	-
BnaA07g04810D	0	0	0	0.71132	0	0.557921	AT3G25470	bacterial hemolysin-related	bacterial hemolysin-related; FUNCTIONS IN: methyltransferase activity, RNA binding, nucleic acid binding; INVOLVED IN: methylation, hemolysis by symbiont of host erythrocytes; LOCATED IN: mitochondrion; EXPRESSED IN: 23 plant structures; EXPRESSED DURING: 15 growth stages; CONTAINS InterPro DOMAIN/s: RNA-binding S4 (InterPro:IPR002942), Ribosomal RNA methyltransferase RrmJ/FtsJ (InterPro:IPR00287…
BnaA07g05870D	3.27257	3.0044	3.94819	0.248488	0	0	-	-	-
BnaA07g06900D	60.254	62.4981	39.8292	3.04432	7.22177	1.64819	AT1G31330	photosystem I subunit F	Encodes subunit F of photosystem I.
BnaA07g06950D	6.7421	6.95548	6.97248	2.69771	4.82003	4.09354	AT1G31130	unknown protein; FUNCTIONS IN: molecular_function unknown; INVOLVED IN: biological_process unknown; LOCATED IN: cellular_component unknown; EXPRESSED IN: 23 plant structures; EXPRESSED DURING: 13 growth stages; BEST Arabidopsis thaliana protein match is: unknown protein (TAIR:AT4G19950.1); Has 246 Blast hits to 244 proteins in 29 species: Archae - 2; Bacteria - 16; Metazoa - 0; Fungi - 0; Plants …	0
BnaA07g07290D	0	0	0	0.327402	0.388227	0.400095	AT1G30460	cleavage and polyadenylation specificity factor 30	Encodes AtCPSF30, the 30-KDa subunit of cleavage and polyadenylation specificity factor. AtCPSF30 is a probable processing endonuclease. Nucleus-localized RNA binding protein capable of interacting with itself and with calmodulin. Its RNA-binding activity is inhibited by calmodulin in a calcium-dependent fashion.
BnaA07g07360D	0.194722	1.09384	0.0285703	0	0	0	.	-	-
BnaA07g07500D	0.33599	0.299363	0.407212	0.130783	0.328475	0.107359	AT1G30790	F-box and associated interaction domains-containing protein	F-box and associated interaction domains-containing protein; CONTAINS InterPro DOMAIN/s: F-box domain, cyclin-like (InterPro:IPR001810), F-box domain, Skp2-like (InterPro:IPR022364), F-box associated domain, type 3 (InterPro:IPR013187), F-box associated interaction domain (InterPro:IPR017451); BEST Arabidopsis thaliana protein match is: F-box and associated interaction domains-containing protein …
BnaA07g07970D	2.85286	2.36535	2.96985	0.21888	0.233883	0.16038	-	-	-
BnaA07g08930D	6.9659	26.7805	45.5965	0.00229933	0	0.010979	AT1G27300	unknown protein; Has 54 Blast hits to 54 proteins in 19 species: Archae - 0; Bacteria - 0; Metazoa - 11; Fungi - 6; Plants - 34; Viruses - 0; Other Eukaryotes - 3 (source: NCBI BLink).	0
BnaA07g09060D	7.80392	7.21441	2.68452	1.58533	1.86189	0.324525	-	-	-
BnaA07g09210D	0.927202	0.790374	0.878304	5.84388	6.63998	4.90121	-	-	-
BnaA07g09600D	0	0	0	10.5583	12.248	14.3998	-	-	-
BnaA07g09930D	2.63378	3.07981	3.04341	0.404802	0.492511	0.508975	AT1G23530	unknown protein; BEST Arabidopsis thaliana protein match is: unknown protein (TAIR:AT1G70470.1); Has 38 Blast hits to 38 proteins in 12 species: Archae - 0; Bacteria - 0; Metazoa - 0; Fungi - 0; Plants - 37; Viruses - 0; Other Eukaryotes - 1 (source: NCBI BLink).	0
BnaA07g10030D	10.0995	14.6814	12.1978	64.9584	46.0687	14.2737	AT1G23290	Ribosomal protein L18e/L15 superfamily protein	Encodes a ribosomal protein L27A, a constituent of the large subunit of the ribosomal complex. Regulated by TCP20.
BnaA07g10100D	8.16957	10.099	20.1103	0	0	0	AT1G23130	Polyketide cyclase/dehydrase and lipid transport superfamily protein	Polyketide cyclase/dehydrase and lipid transport superfamily protein; FUNCTIONS IN: molecular_function unknown; INVOLVED IN: response to biotic stimulus, defense response; LOCATED IN: cellular_component unknown; EXPRESSED IN: 15 plant structures; EXPRESSED DURING: 10 growth stages; CONTAINS InterPro DOMAIN/s: Bet v I allergen (InterPro:IPR000916); BEST Arabidopsis thaliana protein match is: MLP-l…
BnaA07g11230D	0	0.0223993	0	0.180602	0.701862	0.209046	AT1G20870	HSP20-like chaperones superfamily protein	Encodes an anti-silencing factor that prevents gene repression and DNA hypermethylation.
BnaA07g11240D	1.10072	2.13366	0.723232	1.77057	4.76675	4.12185	AT1G20850	xylem cysteine peptidase 2	xylem cysteine peptidase 2 (XCP2); FUNCTIONS IN: cysteine-type peptidase activity, peptidase activity; INVOLVED IN: proteolysis, developmental programmed cell death; LOCATED IN: cell wall; EXPRESSED IN: 23 plant structures; EXPRESSED DURING: 13 growth stages; CONTAINS InterPro DOMAIN/s: Peptidase C1A, papain (InterPro:IPR013128), Proteinase inhibitor I29, cathepsin propeptide (InterPro:IPR013201)…
BnaA07g11280D	5.24573	5.75926	5.36278	0.924411	1.3357	0.887884	AT1G20770	unknown protein; Has 59 Blast hits to 59 proteins in 24 species: Archae - 0; Bacteria - 0; Metazoa - 26; Fungi - 4; Plants - 29; Viruses - 0; Other Eukaryotes - 0 (source: NCBI BLink).	0
BnaA07g11470D	0	0	0.0273773	2.21939	2.24075	0.92031	-	-	-
BnaA07g11510D	0.626774	0.567865	0.210415	0.543991	0.159864	0.860851	AT1G20340	Cupredoxin superfamily protein	recombination and DNA-damage resistance protein (DRT112) One of two Arabidopsis plastocyanin genes. Predominant form, expressed 10x higher than PETE1. PETE2 is thought to be post-transcriptionally regulated via copper accumulation and is involved in copper homeostasis. Mutation of this gene does not have obvious effect on photosynthesis. In plsp1-1 mutant plastids, the nonmature form of the prote…
BnaA07g11540D	14.6805	11.3655	9.78092	0.725516	0.255548	1.43319	-	-	-
BnaA07g11620D	0	0.18698	0	5.60678	4.63328	0.528266	AT1G20140	SKP1-like 4	SKP1-like 4 (SK4); CONTAINS InterPro DOMAIN/s: E3 ubiquitin ligase, SCF complex, Skp subunit (InterPro:IPR016897), SKP1 component, dimerisation (InterPro:IPR016072), SKP1 component (InterPro:IPR001232), BTB/POZ fold (InterPro:IPR011333), SKP1 component, POZ (InterPro:IPR016073); BEST Arabidopsis thaliana protein match is: SKP1-like 3 (TAIR:AT2G25700.1); Has 1439 Blast hits to 1435 proteins in 269…
BnaA07g12440D	0	0	0	2.76574	2.06706	0.712698	-	-	-
BnaA07g12530D	0.0202307	0.000928667	0.000232667	0.339404	0.53328	0.606037	AT5G66540	FUNCTIONS IN: molecular_function unknown; INVOLVED IN: rRNA processing; LOCATED IN: cytosol, nucleolus, nucleus; EXPRESSED IN: 22 plant structures; EXPRESSED DURING: 12 growth stages; CONTAINS InterPro DOMAIN/s: U3 small nucleolar ribonucleoprotein complex, subunit Mpp10p (InterPro:IPR012173), Mpp10 protein (InterPro:IPR007151); Has 30201 Blast hits to 17322 proteins in 780 species: Archae - 12; …	0
BnaA07g12820D	0.00925567	0.002876	0.00202167	0.0676037	0.0663547	0.0298087	.	-	-
BnaA07g13330D	19.5296	22.2366	21.9324	6.03027	0	23.822	AT2G27680	NAD(P)-linked oxidoreductase superfamily protein	NAD(P)-linked oxidoreductase superfamily protein; FUNCTIONS IN: oxidoreductase activity, aldo-keto reductase activity; INVOLVED IN: oxidation reduction; LOCATED IN: chloroplast stroma, chloroplast, chloroplast envelope, plant-type cell wall; EXPRESSED IN: 24 plant structures; EXPRESSED DURING: 14 growth stages; CONTAINS InterPro DOMAIN/s: Aldo/keto reductase (InterPro:IPR001395); BEST Arabidopsis…
BnaA07g13850D	10.4946	9.30839	6.66974	2.2824	2.88825	1.59659	AT2G28380	dsRNA-binding protein 2	Encodes a cytoplasmic dsRNA-binding protein DRB2. A maternally expressed imprinted gene. DRB2 and DRB4 have an antagonistic impact on polymerase IV-dependent siRNA levels.
BnaA07g14200D	10.0143	15.1924	16.2615	10.3567	10.7903	12.3609	AT5G37830	oxoprolinase 1	Encodes a 5-oxoprolinase that acts in the glutathione degradation pathway and in 5-oxoproline metabolism.
BnaA07g14380D	0	0.0254003	0.012288	0.611468	0.851074	1.31279	AT5G38280	PR5-like receptor kinase	putative receptor serine/threonine kinase PR5K (PR5K) mRNA, PR5-like receptor kinase
BnaA07g14820D	51.9304	67.6155	66.3042	27.0004	25.8565	32.9321	AT5G39950	thioredoxin 2	encodes a cytosolic thioredoxin that reduces disulfide bridges of target proteins by the reversible formation of a disulfide bridge between two neighboring Cys residues present in the active site. Thioredoxins have been found to regulate a variety of biological reactions in prokaryotic and eukaryotic cells.
BnaA07g14880D	0.018659	0.41815	0.0397753	0.0238003	0.11534	0.0213893	AT5G40240	nodulin MtN21 /EamA-like transporter family protein	nodulin MtN21-like transporter family protein
BnaA07g15010D	6.21283	4.69931	3.82578	7.45568	4.7516	2.12513	.	-	-
BnaA07g15200D	0.876978	1.50221	1.34014	3.86169	7.47562	8.33449	AT5G40970	Protein of unknown function (DUF 3339)	Protein of unknown function (DUF 3339); CONTAINS InterPro DOMAIN/s: Protein of unknown function DUF3339 (InterPro:IPR021775); BEST Arabidopsis thaliana protein match is: unknown protein (TAIR:AT3G27030.1); Has 1807 Blast hits to 1807 proteins in 277 species: Archae - 0; Bacteria - 0; Metazoa - 736; Fungi - 347; Plants - 385; Viruses - 0; Other Eukaryotes - 339 (source: NCBI BLink).
BnaA07g15440D	0	0.0289883	0	0.64819	1.92022	3.02214	AT5G41761	unknown protein; FUNCTIONS IN: molecular_function unknown; INVOLVED IN: biological_process unknown; LOCATED IN: cellular_component unknown; BEST Arabidopsis thaliana protein match is: unknown protein (TAIR:AT3G55570.1); Has 30201 Blast hits to 17322 proteins in 780 species: Archae - 12; Bacteria - 1396; Metazoa - 17338; Fungi - 3422; Plants - 5037; Viruses - 0; Other Eukaryotes - 2996 (source: NC…	0
BnaA07g15580D	2.96338	3.35635	2.89656	2.31909	2.05733	2.32592	-	-	-
BnaA07g16300D	0	0.00367367	0.00699	0	0	0	.	-	-
BnaA07g16800D	0.634088	0.612668	0.832266	0.143498	0.141299	0.0812577	AT3G56240	copper chaperone	CCH protein belongs to a family of eukaryotic proteins that participate in intracellular copper homeostasis by delivering this metal to the secretory pathway; mainly located along the vascular bundles of senescing leaves and petioles as well as in stem sieve elements; hypothesized to have a role in copper mobilization from decaying organs towards reproductive structures, as a result of metallopro…
BnaA07g16880D	14.2944	12.0367	6.87954	3.01528	2.61014	1.66579	AT3G56460	GroES-like zinc-binding alcohol dehydrogenase family protein	GroES-like zinc-binding alcohol dehydrogenase family protein; FUNCTIONS IN: oxidoreductase activity, binding, zinc ion binding, catalytic activity; INVOLVED IN: oxidation reduction, metabolic process; LOCATED IN: peroxisome; EXPRESSED IN: 22 plant structures; EXPRESSED DURING: 13 growth stages; CONTAINS InterPro DOMAIN/s: GroES-like (InterPro:IPR011032), NAD(P)-binding domain (InterPro:IPR016040)…
BnaA07g17160D	2.15366	2.3286	1.84427	0.911527	0.925186	0.79689	.	-	-
BnaA07g17620D	0.549829	3.3286	2.91516	0	0	0	AT3G58140	phenylalanyl-tRNA synthetase class IIc family protein	phenylalanyl-tRNA synthetase class IIc family protein; FUNCTIONS IN: in 6 functions; INVOLVED IN: tRNA processing, phenylalanyl-tRNA aminoacylation, translation, tRNA aminoacylation, tRNA aminoacylation for protein translation; LOCATED IN: mitochondrion, chloroplast, membrane; EXPRESSED IN: 23 plant structures; EXPRESSED DURING: 13 growth stages; CONTAINS InterPro DOMAIN/s: Phenylalanyl-tRNA synt…
BnaA07g18610D	6.3793	8.80741	6.70329	3.31698	4.81383	3.14393	AT3G59990	methionine aminopeptidase 2B	Encodes a MAP2 like methionine aminopeptidase
BnaA07g18620D	2.25894	2.20086	1.3286	2.33889	3.23651	1.35432	-	-	-
BnaA07g20300D	0.610611	0.211154	0.105272	9.43983	7.07709	3.43155	AT1G79530	glyceraldehyde-3-phosphate dehydrogenase of plastid 1	Encodes one of the chloroplast/plastid localized GAPDH isoforms (GAPCp1/At1g79530 and GAPCp2/At1g16300). gapcp double mutants display a drastic phenotype of arrested root development, dwarfism and sterility. GAPCps are important for the synthesis of serine in roots.
BnaA07g20420D	5.81156	10.3522	9.05505	5.46291	5.77198	5.16637	AT1G79230	mercaptopyruvate sulfurtransferase 1	encodes a sulfurtransferase/rhodaneses, which belongs to a group of enzymes widely distributed in all three phyla that catalyze the transfer of sulfur from a donor to a thiophilic acceptor substrate. The protein and transcript levels are NOT affected by senescence or exogenous cyanide, suggesting that sulfurtransferases are involved in cyanide detoxification.
BnaA07g20590D	22.7877	9.61691	12.571	0.468571	0.93275	1.10736	AT1G78320	glutathione S-transferase TAU 23	Encodes glutathione transferase belonging to the tau class of GSTs. Naming convention according to Wagner et al. (2002).
BnaA07g22770D	0	0	0	0.000978667	0	0	.	-	-
BnaA07g23000D	18.3362	14.3287	2.5322	2.62444	0.217784	0.149104	AT1G72610	germin-like protein 1	germin-like protein (GLP1)
BnaA07g23190D	0.0898007	0.135076	0.039682	1.08269	1.18655	0.827154	AT1G72150	PATELLIN 1	novel cell-plate-associated protein that is related in sequence to proteins involved in membrane trafficking in other eukaryotes
BnaA07g23480D	0.105944	0.100971	0.0339793	0.163783	0.151995	0.126509	AT1G71490	Tetratricopeptide repeat (TPR)-like superfamily protein	Tetratricopeptide repeat (TPR)-like superfamily protein; CONTAINS InterPro DOMAIN/s: Pentatricopeptide repeat (InterPro:IPR002885); BEST Arabidopsis thaliana protein match is: Tetratricopeptide repeat (TPR)-like superfamily protein (TAIR:AT1G22830.2); Has 41551 Blast hits to 13575 proteins in 229 species: Archae - 0; Bacteria - 0; Metazoa - 56; Fungi - 81; Plants - 40794; Viruses - 0; Other Eukar…
BnaA07g23870D	1.29466	1.58049	0.88154	4.37851	3.15879	2.18489	AT1G70280	NHL domain-containing protein	NHL domain-containing protein; CONTAINS InterPro DOMAIN/s: NHL repeat (InterPro:IPR001258), Six-bladed beta-propeller, TolB-like (InterPro:IPR011042); BEST Arabidopsis thaliana protein match is: NHL domain-containing protein (TAIR:AT1G23880.1); Has 7288 Blast hits to 4121 proteins in 430 species: Archae - 61; Bacteria - 1521; Metazoa - 1473; Fungi - 465; Plants - 266; Viruses - 2; Other Eukaryote…
BnaA07g24560D	3.0197	3.27808	2.38868	0.957118	0.560975	0.589921	AT1G68570	Major facilitator superfamily protein	Major facilitator superfamily protein; FUNCTIONS IN: transporter activity; INVOLVED IN: oligopeptide transport; LOCATED IN: membrane; EXPRESSED IN: 23 plant structures; EXPRESSED DURING: 13 growth stages; CONTAINS InterPro DOMAIN/s: Oligopeptide transporter (InterPro:IPR000109), Major facilitator superfamily, general substrate transporter (InterPro:IPR016196); BEST Arabidopsis thaliana protein ma…
BnaA07g24810D	0.918621	0.909192	0.636647	0.60372	0.296801	0.285446	AT1G68080	2-oxoglutarate (2OG) and Fe(II)-dependent oxygenase superfamily protein	2-oxoglutarate (2OG) and Fe(II)-dependent oxygenase superfamily protein; FUNCTIONS IN: oxidoreductase activity, acting on paired donors, with incorporation or reduction of molecular oxygen, iron ion binding, L-ascorbic acid binding; INVOLVED IN: oxidation reduction; EXPRESSED IN: 21 plant structures; EXPRESSED DURING: 13 growth stages; CONTAINS InterPro DOMAIN/s: Prolyl 4-hydroxylase, alpha subun…
BnaA07g24890D	1.87246	1.85994	2.12415	0.705334	0.589018	0.658069	AT1G67710	response regulator 11	Encodes an Arabidopsis response regulator (ARR) protein that acts in concert with other type-B ARRs in the cytokinin signaling pathway.
BnaA07g25160D	1.37056	0	0.611053	7.69461	8.57577	6.53762	.	-	-
BnaA07g25170D	1.48383	0	0.600571	0.0505313	0.0781717	0.0146743	.	-	-
BnaA07g25260D	0.00360467	0.000524667	0.00193867	0	0	0	AT1G65420	Protein of unknown function (DUF565)	Chloroplast localized YCF20-like gene involved in nonphotochemical quenching. Has overlapping functions with npq6.
BnaA07g25600D	0	0	0.036931	1.05432	1.56627	0.387934	.	-	-
BnaA07g25900D	0.915303	0.606141	0.621586	3.63608	1.52805	1.63218	AT1G66520	formyltransferase, putative	pigment defective 194 (pde194); FUNCTIONS IN: hydroxymethyl-, formyl- and related transferase activity, formyltetrahydrofolate deformylase activity, catalytic activity; INVOLVED IN: purine ribonucleotide biosynthetic process, biosynthetic process; EXPRESSED IN: 21 plant structures; EXPRESSED DURING: 13 growth stages; CONTAINS InterPro DOMAIN/s: Formyl transferase, C-terminal (InterPro:IPR005793),…
BnaA07g26240D	2.45193	3.58974	3.20132	2.47571	2.78127	2.45058	AT1G67190	F-box/RNI-like superfamily protein	F-box/RNI-like superfamily protein; CONTAINS InterPro DOMAIN/s: F-box domain, cyclin-like (InterPro:IPR001810), F-box domain, Skp2-like (InterPro:IPR022364); BEST Arabidopsis thaliana protein match is: F-box/RNI-like superfamily protein (TAIR:AT1G10780.1); Has 147 Blast hits to 147 proteins in 14 species: Archae - 0; Bacteria - 0; Metazoa - 2; Fungi - 0; Plants - 143; Viruses - 0; Other Eukaryote…
BnaA07g26320D	1.00972	0.310662	0.552265	0.0393693	0.00210933	0.0626253	AT1G67310	Calmodulin-binding transcription activator protein with CG-1 and Ankyrin domains	Calmodulin-binding transcription activator protein with CG-1 and Ankyrin domains; FUNCTIONS IN: calmodulin binding, transcription regulator activity; INVOLVED IN: regulation of transcription; LOCATED IN: cytosol; EXPRESSED IN: 23 plant structures; EXPRESSED DURING: 13 growth stages; CONTAINS InterPro DOMAIN/s: Immunoglobulin E-set (InterPro:IPR014756), Ankyrin repeat-containing domain (InterPro:I…
BnaA07g26660D	0.140496	0.0744277	0.074384	2.95241	1.26178	8.31316	.	-	-
BnaA07g27230D	9.33801	0	0	0.676791	0.369631	0.000811	AT1G68560	alpha-xylosidase 1	Encodes a bifunctional alpha-l-arabinofuranosidase/beta-d-xylosidase that belongs to family 3 of glycoside hydrolases.
BnaA07g27380D	2.41954	2.11512	2.09396	4.47702	3.25657	4.27938	AT1G68730	Zim17-type zinc finger protein	Zim17-type zinc finger protein; LOCATED IN: chloroplast; CONTAINS InterPro DOMAIN/s: Zinc finger, Zim17-type (InterPro:IPR007853); BEST Arabidopsis thaliana protein match is: Zim17-type zinc finger protein (TAIR:AT5G27280.1); Has 375 Blast hits to 375 proteins in 159 species: Archae - 0; Bacteria - 0; Metazoa - 108; Fungi - 113; Plants - 110; Viruses - 0; Other Eukaryotes - 44 (source: NCBI BLink…
BnaA07g27780D	0	0.126451	0.0949603	0.126805	0.138948	0.0764707	AT1G69250	Nuclear transport factor 2 (NTF2) family protein with RNA binding (RRM-RBD-RNP motifs) domain	Nuclear transport factor 2 (NTF2) family protein with RNA binding (RRM-RBD-RNP motifs) domain; FUNCTIONS IN: RNA binding, nucleotide binding, nucleic acid binding; INVOLVED IN: transport, nucleocytoplasmic transport; LOCATED IN: intracellular; EXPRESSED IN: 23 plant structures; EXPRESSED DURING: 13 growth stages; CONTAINS InterPro DOMAIN/s: Nuclear transport factor 2 (InterPro:IPR002075), RNA rec…
BnaA07g27940D	34.6244	90.6446	105.015	12.5472	17.0571	28.5785	AT1G69410	eukaryotic elongation factor 5A-3	Encodes eIF5A-2, a putative eukaryotic translation initiation factor. There are three eIF5A coding genes in Arabidopsis: eIF5A-1/At1g13950, eIF5A-2/At1g26630 and eIF5A-3/At1g69410.
BnaA07g28110D	24.8702	12.8577	11.2798	30.107	25.218	18.1542	.	-	-
BnaA07g28200D	0.132408	0.0670663	0.0793667	0.562186	0.740679	0.747581	AT1G66650	Protein with RING/U-box and TRAF-like domains	Protein with RING/U-box and TRAF-like domains; FUNCTIONS IN: ubiquitin-protein ligase activity, zinc ion binding; INVOLVED IN: multicellular organismal development, protein ubiquitination, ubiquitin-dependent protein catabolic process; LOCATED IN: intracellular, nucleus; EXPRESSED IN: 8 plant structures; EXPRESSED DURING: 4 anthesis, F mature embryo stage, petal differentiation and expansion stag…
BnaA07g28810D	27.1033	19.1158	53.951	8.09895	19.6766	40.9558	AT1G70700	TIFY domain/Divergent CCT motif family protein	JAZ9 is a protein presumed to be involved in jasmonate signaling. JAZ9 transcript levels rise in response to a jasmonate stimulus. JAZ9 can interact with the COI1 F-box subunit of an SCF E3 ubiquitin ligase in a yeast-two-hybrid assay only in the presence of jasmonate-isoleucine (JA-ILE) or coronatine. The Jas domain appears to be important for JAZ9-COI1 interactions in the presence of coronatine…
BnaA07g29220D	1.08673	2.2046	0.286249	0.42097	8.8549	0.807064	AT1G71250	GDSL-like Lipase/Acylhydrolase superfamily protein	GDSL-motif esterase/acyltransferase/lipase. Enzyme group with broad substrate specificity that may catalyze acyltransfer or hydrolase reactions with lipid and non-lipid substrates.
BnaA07g29240D	5.53502	6.56497	6.72271	14.0494	12.6953	9.73905	AT1G71300	Vps52 / Sac2 family	Vps52 / Sac2 family ; CONTAINS InterPro DOMAIN/s: Vps52/Sac2 (InterPro:IPR007258); BEST Arabidopsis thaliana protein match is: Vps52 / Sac2 family (TAIR:AT1G71270.1); Has 611 Blast hits to 569 proteins in 208 species: Archae - 8; Bacteria - 23; Metazoa - 207; Fungi - 140; Plants - 62; Viruses - 0; Other Eukaryotes - 171 (source: NCBI BLink).
BnaA07g29260D	5.00845	7.40824	9.93029	3.95097	6.67166	4.35456	.	-	-
BnaA07g29320D	0.0224773	0.041299	0.0362467	1.7376	1.89294	0.891998	AT1G71410	ARM repeat superfamily protein	ARM repeat superfamily protein; FUNCTIONS IN: binding, protein kinase activity, kinase activity, ATP binding; INVOLVED IN: protein amino acid phosphorylation; LOCATED IN: membrane; EXPRESSED IN: 24 plant structures; EXPRESSED DURING: 15 growth stages; CONTAINS InterPro DOMAIN/s: Protein kinase, catalytic domain (InterPro:IPR000719), Armadillo-type fold (InterPro:IPR016024), Serine/threonine-prote…
BnaA07g29330D	0.189884	0.0500327	0.0360593	1.15868	0.930867	0.545808	AT1G71420	Tetratricopeptide repeat (TPR)-like superfamily protein	Tetratricopeptide repeat (TPR)-like superfamily protein; CONTAINS InterPro DOMAIN/s: Pentatricopeptide repeat (InterPro:IPR002885); BEST Arabidopsis thaliana protein match is: Tetratricopeptide repeat (TPR)-like superfamily protein (TAIR:AT5G09950.1); Has 35655 Blast hits to 13198 proteins in 229 species: Archae - 0; Bacteria - 0; Metazoa - 33; Fungi - 71; Plants - 35090; Viruses - 0; Other Eukar…
BnaA07g29390D	21.9262	18.3809	18.8319	22.7774	14.0764	46.8773	AT1G71500	Rieske (2Fe-2S) domain-containing protein	Encodes PSB33, a protein conserved in the plastid lineage. PSB33 is associated with the chloroplast thylakoid membrane and provides stability to Photosystem II.
BnaA07g29530D	0.825486	1.64288	0.959712	7.93522	14.0429	11.1144	AT1G71750	Hypoxanthine-guanine phosphoribosyltransferase	Encodes a protein with hypoxanthine-guanine-phosphoribosyltransferase activity. Unlike some related enzymes, it does not appear to act on xanthine in vitro. The enzyme catalyzes reactions occurring in both directions, but appears to prefer acting on guanine, followed by hypoxanthine, in vitro. The enzyme is likely to function in purine salvage pathways and appears to be important for seed germina…
BnaA07g29820D	4.69811	4.95871	6.23936	28.1985	29.0555	28.2043	AT1G72020	unknown protein; Has 52 Blast hits to 52 proteins in 18 species: Archae - 0; Bacteria - 0; Metazoa - 0; Fungi - 0; Plants - 52; Viruses - 0; Other Eukaryotes - 0 (source: NCBI BLink).	0
BnaA07g29830D	2.84028	1.03284	0.918553	5.19051	3.48395	4.10285	AT1G72040	P-loop containing nucleoside triphosphate hydrolases superfamily protein	Encodes a multisubstrate deoxyribonucleoside kinase that salvages DNA precursors.
BnaA07g29850D	0	0	0	0.790483	0.684431	0.594579	-	-	-
BnaA07g30020D	0.043127	0.0251637	0.105957	4.70136	4.79911	15.8736	.	-	-
BnaA07g30270D	0	0	0	3.00022	2.16447	1.98726	AT1G72530	plastid developmental protein DAG, putative	plastid developmental protein DAG, putative; BEST Arabidopsis thaliana protein match is: cobalt ion binding (TAIR:AT3G15000.1); Has 238 Blast hits to 218 proteins in 13 species: Archae - 0; Bacteria - 0; Metazoa - 0; Fungi - 0; Plants - 238; Viruses - 0; Other Eukaryotes - 0 (source: NCBI BLink).
BnaA07g30430D	2.80931	1.53089	1.92886	1.34247	2.07035	2.19758	AT1G72770	HYPERSENSITIVE TO ABA1	mutant has ABA hypersensitive inhibition of seed germination; Protein Phosphatase 2C; regulates the activation of the Snf1-related kinase OST1 by abscisic acid.
BnaA07g30760D	0.61356	1.79	2.01131	0	0	0.742172	.	-	-
BnaA07g30870D	0	0	0	0.0123177	0	0	AT1G73430	sec34-like family protein	sec34-like family protein; FUNCTIONS IN: molecular_function unknown; INVOLVED IN: intracellular protein transport; LOCATED IN: chloroplast, membrane, cis-Golgi network; EXPRESSED IN: 21 plant structures; EXPRESSED DURING: 13 growth stages; CONTAINS InterPro DOMAIN/s: Sec34-like protein (InterPro:IPR007265); Has 353 Blast hits to 340 proteins in 172 species: Archae - 0; Bacteria - 4; Metazoa - 117…
BnaA07g31180D	0.0125763	0.012264	0	30.981	12.7542	0.54404	AT1G74020	strictosidine synthase 2	Encodes AtSS-2 strictosidine synthase.
BnaA07g31250D	0.0384347	0.960378	0.0791433	3.44916	13.2418	1.17853	.	-	-
BnaA07g31580D	0.0935	0	0	2.22172	1.20379	0.35529	AT1G74458	unknown protein; LOCATED IN: endomembrane system; Has 9 Blast hits to 9 proteins in 4 species: Archae - 0; Bacteria - 0; Metazoa - 0; Fungi - 0; Plants - 9; Viruses - 0; Other Eukaryotes - 0 (source: NCBI BLink).	0
BnaA07g31630D	0	0	0	15.5129	12.073	8.70094	AT1G74520	HVA22 homologue A	Part of the AtHVA22a family. Protein expression is ABA- and stress-inducible.
BnaA07g31660D	0.051786	0	0	0.831086	0.647967	0.597141	AT1G74590	glutathione S-transferase TAU 10	Encodes glutathione transferase belonging to the tau class of GSTs. Naming convention according to Wagner et al. (2002).
BnaA07g31750D	1.38074	1.40834	1.1981	4.46078	3.61037	3.37601	AT1G74800	Galactosyltransferase family protein	Encodes a hydroxyproline galactosyltransferase GALT5. Functions together with GALT2 as redundant GALTs that control AGP (arabinogalactan-proteins) O-glycosylation, which is essential for normal growth and development.
BnaA07g31780D	0.806016	0.143336	0.872512	2.06307	2.73247	5.08727	AT1G74850	plastid transcriptionally active 2	Present in transcriptionally active plastid chromosomes. Involved in plastid gene expression.
BnaA07g31880D	3.66285	0.309749	3.69718	34.5437	36.291	16.4396	AT1G74950	TIFY domain/Divergent CCT motif family protein	TIFY10B; CONTAINS InterPro DOMAIN/s: Tify (InterPro:IPR010399), CCT domain-like (InterPro:IPR018467); BEST Arabidopsis thaliana protein match is: jasmonate-zim-domain protein 1 (TAIR:AT1G19180.1); Has 432 Blast hits to 427 proteins in 29 species: Archae - 0; Bacteria - 0; Metazoa - 0; Fungi - 0; Plants - 432; Viruses - 0; Other Eukaryotes - 0 (source: NCBI BLink).
BnaA07g31960D	4.48309	4.72271	5.07932	7.09311	7.11753	5.70949	AT1G75200	flavodoxin family protein / radical SAM domain-containing protein	flavodoxin family protein / radical SAM domain-containing protein; FUNCTIONS IN: iron-sulfur cluster binding, oxidoreductase activity, FMN binding, catalytic activity; EXPRESSED IN: 18 plant structures; EXPRESSED DURING: 7 growth stages; CONTAINS InterPro DOMAIN/s: Flavodoxin/nitric oxide synthase (InterPro:IPR008254), Radical SAM (InterPro:IPR007197), Wyosine base formation (InterPro:IPR013917);…
BnaA07g32110D	0.0398187	0.0504447	0.039769	0.62347	0.599838	0.622981	AT1G75810	unknown protein; FUNCTIONS IN: molecular_function unknown; INVOLVED IN: biological_process unknown; LOCATED IN: endomembrane system; EXPRESSED IN: 24 plant structures; EXPRESSED DURING: 15 growth stages; Has 13 Blast hits to 13 proteins in 5 species: Archae - 0; Bacteria - 0; Metazoa - 0; Fungi - 0; Plants - 13; Viruses - 0; Other Eukaryotes - 0 (source: NCBI BLink).	0
BnaA07g32780D	0	0	0	9.61012	4.45649	11.6132	AT1G76450	Photosystem II reaction center PsbP family protein	Photosystem II reaction center PsbP family protein; FUNCTIONS IN: calcium ion binding; INVOLVED IN: photosynthesis; LOCATED IN: thylakoid, thylakoid lumen, chloroplast thylakoid membrane, chloroplast thylakoid lumen, chloroplast; EXPRESSED IN: 23 plant structures; EXPRESSED DURING: 14 growth stages; CONTAINS InterPro DOMAIN/s: Photosystem II oxygen evolving complex protein PsbP (InterPro:IPR00268…
BnaA07g33140D	58.3906	53.5333	57.6829	13.3635	17.4256	18.5902	-	-	-
BnaA07g33950D	0	0	0	0.668841	0.388609	0.503133	-	-	-
BnaA07g34020D	1.62971	0.558768	0	2.74384	2.03256	0.178213	AT1G78170	unknown protein; BEST Arabidopsis thaliana protein match is: unknown protein (TAIR:AT1G22250.1); Has 66 Blast hits to 66 proteins in 11 species: Archae - 0; Bacteria - 0; Metazoa - 0; Fungi - 0; Plants - 66; Viruses - 0; Other Eukaryotes - 0 (source: NCBI BLink).	0
BnaA07g34250D	0.037067	0.111527	0.129588	1.21737	0.857948	0.9208	AT1G78600	light-regulated zinc finger protein 1	light-regulated zinc finger protein 1 (LZF1); CONTAINS InterPro DOMAIN/s: Zinc finger, B-box (InterPro:IPR000315); BEST Arabidopsis thaliana protein match is: B-box zinc finger family protein (TAIR:AT1G06040.1); Has 1826 Blast hits to 1364 proteins in 120 species: Archae - 0; Bacteria - 0; Metazoa - 16; Fungi - 0; Plants - 1701; Viruses - 0; Other Eukaryotes - 109 (source: NCBI BLink).
BnaA07g35160D	2.61306	1.12666	1.99862	3.90312	4.30592	4.22749	AT1G80950	Phospholipid/glycerol acyltransferase family protein	Phospholipid/glycerol acyltransferase family protein; FUNCTIONS IN: acyltransferase activity; INVOLVED IN: metabolic process; LOCATED IN: endoplasmic reticulum, nucleus; EXPRESSED IN: 25 plant structures; EXPRESSED DURING: 15 growth stages; CONTAINS InterPro DOMAIN/s: Phospholipid/glycerol acyltransferase (InterPro:IPR002123); BEST Arabidopsis thaliana protein match is: calcineurin B subunit-rela…
BnaA07g36520D	1.70357	1.0506	1.26731	0.200146	0.017721	0.456643	AT1G28670	GDSL-like Lipase/Acylhydrolase superfamily protein	Arabidopsis thaliana lipase
BnaA07g36910D	9.84244	10.2402	11.9484	0.968538	1.05148	0.243289	AT1G25420	Regulator of Vps4 activity in the MVB pathway protein	Regulator of Vps4 activity in the MVB pathway protein; CONTAINS InterPro DOMAIN/s: Protein of unknown function DUF292, eukaryotic (InterPro:IPR005061); BEST Arabidopsis thaliana protein match is: Regulator of Vps4 activity in the MVB pathway protein (TAIR:AT1G34220.2); Has 638 Blast hits to 625 proteins in 177 species: Archae - 0; Bacteria - 0; Metazoa - 143; Fungi - 157; Plants - 289; Viruses - …
BnaA07g37120D	0	0	0	0	0.896651	0.244244	AT1G25550	myb-like transcription factor family protein	myb-like transcription factor family protein; CONTAINS InterPro DOMAIN/s: Homeodomain-like (InterPro:IPR009057), Myb, DNA-binding (InterPro:IPR014778), Myb-like DNA-binding domain, SHAQKYF class (InterPro:IPR006447), HTH transcriptional regulator, Myb-type, DNA-binding (InterPro:IPR017930), Homeodomain-related (InterPro:IPR012287); BEST Arabidopsis thaliana protein match is: myb-like transcriptio…
BnaA07g37130D	1.36741	1.91322	2.28954	6.41004	8.69486	8.69021	AT1G25520	Uncharacterized protein family (UPF0016)	Uncharacterized protein family (UPF0016); INVOLVED IN: response to karrikin; LOCATED IN: membrane; EXPRESSED IN: 22 plant structures; EXPRESSED DURING: 13 growth stages; CONTAINS InterPro DOMAIN/s: Uncharacterised protein family UPF0016 (InterPro:IPR001727); BEST Arabidopsis thaliana protein match is: Uncharacterized protein family (UPF0016) (TAIR:AT1G68650.1); Has 1806 Blast hits to 1733 protein…
BnaA07g37150D	12.2108	18.8518	19.8695	0	0	0	AT1G25490	ARM repeat superfamily protein	One of three genes encoding phosphoprotein phosphatase 2A regulatory subunit A; Recessive ethylene-response mutant EER1 displays increased ethylene sensitivity in the hypocotyl and stem
BnaA07g37570D	0	0	0	0	0.0702917	0.563027	.	-	-
BnaA07g37890D	7.78762	6.79633	6.61879	1.4936	2.21123	2.59009	AT3G55380	ubiquitin-conjugating enzyme 14	ubiquitin-conjugating enzyme 14 (UBC14); CONTAINS InterPro DOMAIN/s: Ubiquitin-conjugating enzyme/RWD-like (InterPro:IPR016135), Ubiquitin-conjugating enzyme, E2 (InterPro:IPR000608); BEST Arabidopsis thaliana protein match is: ubiquitin carrier protein 7 (TAIR:AT5G59300.1); Has 10102 Blast hits to 10062 proteins in 394 species: Archae - 0; Bacteria - 0; Metazoa - 4371; Fungi - 2215; Plants - 187…
BnaA07g38070D	3.59258	5.08882	5.39582	0	0	0.0143407	AT3G61350	SKP1 interacting partner 4	Encodes an SKP1 interacting partner (SKIP4).
BnaA07g38410D	0.12157	0.179402	0.339658	0	0	0	-	-	-
BnaA07g38420D	0.019279	0.0502433	0.000268333	0.751076	4.21595	3.09093	-	-	-
BnaA07g38720D	2.68841	3.99249	4.43463	0.123044	0.288386	0.320608	.	-	-
BnaA07g39020D	4.62389	4.96715	4.02522	6.61208	5.41433	5.00981	AT1G73720	transducin family protein / WD-40 repeat family protein	Encodes SMU1, a protein involved in RNA splicing.
BnaA08g01030D	3.50972	3.24769	2.32219	15.2436	13.6489	5.67466	AT1G53710	Calcineurin-like metallo-phosphoesterase superfamily protein	Calcineurin-like metallo-phosphoesterase superfamily protein; FUNCTIONS IN: hydrolase activity, protein serine/threonine phosphatase activity; INVOLVED IN: biological_process unknown; LOCATED IN: endomembrane system; EXPRESSED IN: 21 plant structures; EXPRESSED DURING: 13 growth stages; CONTAINS InterPro DOMAIN/s: Metallophosphoesterase (InterPro:IPR004843); Has 794 Blast hits to 778 proteins in …
BnaA08g02230D	0	0.500837	0	0	0	0	AT1G50140	P-loop containing nucleoside triphosphate hydrolases superfamily protein	P-loop containing nucleoside triphosphate hydrolases superfamily protein; FUNCTIONS IN: nucleoside-triphosphatase activity, ATPase activity, nucleotide binding, ATP binding; INVOLVED IN: biological_process unknown; LOCATED IN: cellular_component unknown; EXPRESSED IN: 23 plant structures; EXPRESSED DURING: 15 growth stages; CONTAINS InterPro DOMAIN/s: ATPase, AAA-type, core (InterPro:IPR003959), …
BnaA08g02930D	0.00291133	0.001783	0.000441333	0	0	0	AT1G48920	nucleolin like 1	Encodes ATNUC-L1 (NUCLEOLIN LIKE 1), the predominant form of the two nucleolin proteins found in Arabidopsis. This protein is involved in rRNA processing, ribosome biosynthesis, and vascular pattern formation. PARL1 localizes to the nucleolus and parl1 mutants accumulate elevated levels of the unspliced 35S pre-rRNA. parl1 mutants also have defects in cotyledon, leaf, sepal, and petal vein patter…
BnaA08g03160D	27.2872	19.7132	29.3261	0	0.211824	0.237264	-	-	-
BnaA08g04960D	3.53463	3.82589	3.98861	0	0.047831	0.0133417	.	-	-
BnaA08g06380D	4.12277	4.0168	3.7486	5.23198	4.56779	2.80517	AT1G34570	Essential protein Yae1, N-terminal	Essential protein Yae1, N-terminal; CONTAINS InterPro DOMAIN/s: Essential protein Yae1, N-terminal (InterPro:IPR019191); BEST Arabidopsis thaliana protein match is: Essential protein Yae1, N-terminal (TAIR:AT3G15750.1); Has 136 Blast hits to 136 proteins in 50 species: Archae - 0; Bacteria - 0; Metazoa - 55; Fungi - 17; Plants - 55; Viruses - 0; Other Eukaryotes - 9 (source: NCBI BLink).
BnaA08g06730D	0	0.023125	0	4.21349	5.38529	6.0966	AT1G32990	plastid ribosomal protein l11	mutant has Decreased effective quantum yield of photosystem II; Pale green plants; Reduced growth rate; Plastid Ribosomal Protein L11
BnaA08g07390D	1.53134	3.72075	5.28573	0	0.0194067	0	-	-	-
BnaA08g07580D	0.467956	0.520086	0.788209	0.249353	0.066393	0.0795977	AT4G14040	selenium-binding protein 2	selenium-binding protein 2 (SBP2); FUNCTIONS IN: selenium binding; INVOLVED IN: polar nucleus fusion; LOCATED IN: cellular_component unknown; EXPRESSED IN: guard cell; EXPRESSED DURING: seedling growth; CONTAINS InterPro DOMAIN/s: Cytochrome cd1-nitrite reductase-like, C-terminal haem d1 (InterPro:IPR011048), Selenium-binding protein (InterPro:IPR008826); BEST Arabidopsis thaliana protein match i…
BnaA08g07630D	1.78359	1.82041	1.8054	2.79709	2.43788	1.74085	AT4G14110	COP9 signalosome, subunit CSN8	Represses photomorphogenesis and induces skotomorphogenesis in the dark. A component of the COP9 signalosome complex.
BnaA08g07710D	0.135206	0	0	17.1221	5.36327	0.637873	.	-	-
BnaA08g07730D	0.006945	0	0	0.228398	0.12236	0.10477	-	-	-
BnaA08g08050D	0.776091	0.942292	1.03083	0	0	0	.	-	-
BnaA08g10750D	0.495802	0.322448	0.0595777	7.68025	5.00226	1.96794	-	-	-
BnaA08g12450D	3.16835	8.08343	4.03522	22.6324	19.8094	10.3717	AT4G31490	Coatomer, beta subunit	Coatomer, beta subunit; FUNCTIONS IN: clathrin binding, structural molecule activity, binding; INVOLVED IN: intracellular protein transport, vesicle-mediated transport; LOCATED IN: membrane; EXPRESSED IN: guard cell, leaf; CONTAINS InterPro DOMAIN/s: Coatomer, beta subunit, C-terminal (InterPro:IPR011710), Armadillo-like helical (InterPro:IPR011989), Coatomer, beta subunit (InterPro:IPR016460), A…
BnaA08g12540D	0.192243	0.10759	0.168112	0.032569	0.0607727	0	AT4G31360	selenium binding	selenium binding; FUNCTIONS IN: selenium binding; INVOLVED IN: cell redox homeostasis; EXPRESSED IN: 22 plant structures; EXPRESSED DURING: 12 growth stages; CONTAINS InterPro DOMAIN/s: Selenoprotein, Rdx type (InterPro:IPR011893); BEST Arabidopsis thaliana protein match is: selenium binding (TAIR:AT2G24440.1); Has 221 Blast hits to 197 proteins in 65 species: Archae - 0; Bacteria - 10; Metazoa -…
BnaA08g13000D	0.21727	0.411307	0.0945613	0.805711	0.586716	0.499696	AT4G30550	Class I glutamine amidotransferase-like superfamily protein	Class I glutamine amidotransferase-like superfamily protein; FUNCTIONS IN: catalytic activity, acyltransferase activity; INVOLVED IN: L-methionine biosynthetic process from homoserine via O-succinyl-L-homoserine and cystathionine; LOCATED IN: endomembrane system, cytoplasm; EXPRESSED IN: 23 plant structures; EXPRESSED DURING: 15 growth stages; CONTAINS InterPro DOMAIN/s: Homoserine O-succinyltran…
BnaA08g13140D	1.37908	0.862849	3.71607	0.117068	0.032005	1.4472	AT4G30210	P450 reductase 2	Encodes NADPH-cytochrome P450 reductase that catalyzes the first oxidative step of the phenylpropanoid general pathway.
BnaA08g13480D	0	0	0	17.4605	8.21791	6.18238	AT4G29260	HAD superfamily, subfamily IIIB acid phosphatase	HAD superfamily, subfamily IIIB acid phosphatase ; FUNCTIONS IN: acid phosphatase activity; INVOLVED IN: biological_process unknown; LOCATED IN: plasma membrane, vacuole; EXPRESSED IN: 26 plant structures; EXPRESSED DURING: 15 growth stages; CONTAINS InterPro DOMAIN/s: Acid phosphatase (Class B) (InterPro:IPR005519), Vegetative storage protein/acid phosphatase (InterPro:IPR014403), Acid phosphata…
BnaA08g13580D	0	0	0	8.82789	6.46209	4.1164	-	-	-
BnaA08g13990D	0	0.00555333	0.0365837	0.35822	0.429459	0.544098	AT4G27880	Protein with RING/U-box and TRAF-like domains	Protein with RING/U-box and TRAF-like domains; FUNCTIONS IN: ubiquitin-protein ligase activity, zinc ion binding; INVOLVED IN: multicellular organismal development, protein ubiquitination, ubiquitin-dependent protein catabolic process; LOCATED IN: mitochondrion, nucleus; EXPRESSED IN: 24 plant structures; EXPRESSED DURING: 15 growth stages; CONTAINS InterPro DOMAIN/s: TRAF-like (InterPro:IPR00897…
BnaA08g14300D	0	0	0	0	0	0.0183167	AT4G26780	Co-chaperone GrpE family protein	unknown function
BnaA08g14340D	1.40933	0.687963	0.525499	0.209607	0.0782083	0.0308703	.	-	-
BnaA08g14470D	0.022851	0.027095	0.044042	0	0	0	.	-	-
BnaA08g14500D	0	0	0	2.18945	2.49019	1.08978	.	-	-
BnaA08g14510D	0.0500377	0.082424	0	0.193461	0.0332733	0.106005	.	-	-
BnaA08g14610D	7.29164	8.39183	8.00599	8.46617	8.39224	7.70932	AT4G24820	26S proteasome, regulatory subunit Rpn7;Proteasome component (PCI) domain	26S proteasome, regulatory subunit Rpn7;Proteasome component (PCI) domain; FUNCTIONS IN: molecular_function unknown; INVOLVED IN: protein catabolic process, ubiquitin-dependent protein catabolic process; LOCATED IN: proteasome complex, nucleus, plasma membrane, proteasome regulatory particle, lid subcomplex, membrane; EXPRESSED IN: 23 plant structures; EXPRESSED DURING: 13 growth stages; CONTAINS…
BnaA08g14700D	0.492764	0.947882	1.36843	0.0438917	0.00329033	0.020756	AT4G24550	Clathrin adaptor complexes medium subunit family protein	Clathrin adaptor complexes medium subunit family protein; INVOLVED IN: intracellular protein transport, transport, vesicle-mediated transport; LOCATED IN: clathrin vesicle coat, clathrin adaptor complex; EXPRESSED IN: 22 plant structures; EXPRESSED DURING: 13 growth stages; CONTAINS InterPro DOMAIN/s: Clathrin adaptor, mu subunit, C-terminal (InterPro:IPR008968), Clathrin adaptor, mu subunit (Int…
BnaA08g15020D	0	0.996243	0	1.27669	50.78	27.698	.	-	-
BnaA08g15090D	2.72398	1.36522	1.93013	1.55644	1.38317	1.11227	AT4G23770	unknown protein; BEST Arabidopsis thaliana protein match is: unknown protein (TAIR:AT4G23780.1); Has 17 Blast hits to 17 proteins in 6 species: Archae - 0; Bacteria - 2; Metazoa - 0; Fungi - 0; Plants - 13; Viruses - 0; Other Eukaryotes - 2 (source: NCBI BLink).	0
BnaA08g15540D	0.0598613	0.067007	0.040406	0.580255	1.0345	0.951668	AT4G37020	BEST Arabidopsis thaliana protein match is: eukaryotic initiation factor 4A-III (TAIR:AT3G19760.1); Has 30201 Blast hits to 17322 proteins in 780 species: Archae - 12; Bacteria - 1396; Metazoa - 17338; Fungi - 3422; Plants - 5037; Viruses - 0; Other Eukaryotes - 2996 (source: NCBI BLink).	0
BnaA08g15710D	1.33772	1.76867	0.684844	6.84353	3.80918	1.46117	AT4G37590	Phototropic-responsive NPH3 family protein	A member of the NPY gene family (NPY1/AT4G31820, NPY2/AT2G14820, NPY3/AT5G67440, NPY4/AT2G23050, NPY5/AT4G37590). Involved in auxin-mediated organogenesis.
BnaA08g16340D	3.99986	1.4197	1.63235	0.0507367	0	2.86667e-05	AT4G39680	SAP domain-containing protein	SAP domain-containing protein; FUNCTIONS IN: DNA binding, nucleic acid binding; INVOLVED IN: biological_process unknown; LOCATED IN: cytosol, nucleus, chloroplast; EXPRESSED IN: 26 plant structures; EXPRESSED DURING: 14 growth stages; CONTAINS InterPro DOMAIN/s: DNA-binding SAP (InterPro:IPR003034); Has 10985 Blast hits to 6880 proteins in 693 species: Archae - 26; Bacteria - 1256; Metazoa - 3900…
BnaA08g16450D	2.35146	5.94297	5.10864	4.4656	5.66345	4.74539	.	-	-
BnaA08g16780D	0.757298	0.834215	0.799933	0.0339797	0.133588	0.058798	AT4G39070	B-box zinc finger family protein	Encodes BZS1, a brassinosteroids-regulated BZR1 target (BRBT) gene. BZS1 is a putative zinc finger transcription factor. Expression of BZS1 was increased under BR-deficient condition and repressed by BR. Transgenic Arabidopsis plants overexpressing BZS1 showed a hypersensitivity to the BR biosynthetic inhibitor brassinazole (BRZ). In contrast, transgenic plants expressing reduced level of BZS1 ha…
BnaA08g16810D	1.29617	1.51439	1.38299	0.897628	1.3323	0.683946	AT4G38980	unknown protein; Has 44 Blast hits to 44 proteins in 19 species: Archae - 0; Bacteria - 2; Metazoa - 2; Fungi - 8; Plants - 24; Viruses - 0; Other Eukaryotes - 8 (source: NCBI BLink).	0
BnaA08g18690D	2.81442	1.56492	0.966777	9.67787	10.0939	2.99437	AT1G27950	glycosylphosphatidylinositol-anchored lipid protein transfer 1	Encodes LTPG1, a lipid transfer protein with a predicted GPI (glycosylphosphatidylinositol)-anchor domain. Localized in the plasma membrane. Disruption of the LTPG1 gene causes alterations of cuticular lipid composition, but no significant changes on total wax and cutin monomer loads are seen.
BnaA08g19240D	2.56832	3.26824	3.8492	0.858017	0.722462	3.48727	AT1G25220	anthranilate synthase beta subunit 1	Catalyzes the first step of tryptophan biosynthesis: Chorismate L-Glutamine = Anthranilate Pyruvate L-Glutamate. Functions as a heterocomplex with anthranilate synthase alpha subunit (ASA1 or ASA2).
BnaA08g19440D	0	0	0	11.1483	10.3903	6.50821	AT1G25490	ARM repeat superfamily protein	One of three genes encoding phosphoprotein phosphatase 2A regulatory subunit A; Recessive ethylene-response mutant EER1 displays increased ethylene sensitivity in the hypocotyl and stem
BnaA08g19580D	0.633321	0.392371	0.311817	4.79103	4.08437	4.13454	AT1G26120	alpha/beta-Hydrolases superfamily protein	Isoprenylcysteine methylesterase-like 1 (ICME-LIKE1); FUNCTIONS IN: hydrolase activity; INVOLVED IN: metabolic process; LOCATED IN: cellular_component unknown; CONTAINS InterPro DOMAIN/s: Carboxylesterase, type B (InterPro:IPR002018), Alpha/beta hydrolase fold-3 (InterPro:IPR013094); BEST Arabidopsis thaliana protein match is: prenylcysteine methylesterase (TAIR:AT5G15860.1); Has 9242 Blast hits …
BnaA08g20120D	0	0	0	1.18584	0.690953	0.541003	AT1G27120	Galactosyltransferase family protein	Galactosyltransferase family protein; FUNCTIONS IN: transferase activity, transferring hexosyl groups, transferase activity, transferring glycosyl groups; INVOLVED IN: protein amino acid glycosylation; LOCATED IN: endomembrane system, membrane; EXPRESSED IN: 23 plant structures; EXPRESSED DURING: 13 growth stages; CONTAINS InterPro DOMAIN/s: Galectin, carbohydrate recognition domain (InterPro:IPR…
BnaA08g20970D	0.173838	1.53714	1.57648	0	0	0.0852447	AT1G22070	TGA1A-related gene 3	Encodes a transcription factor. Like other TGAla-related factors, TGA3 has a highly conserved bZIP region and exhibits similar DNA-binding properties.
BnaA08g21220D	0	0	0	5.20053	5.10039	2.6882	AT1G21690	ATPase family associated with various cellular activities (AAA)	embryo defective 1968 (EMB1968); FUNCTIONS IN: in 6 functions; INVOLVED IN: embryo development ending in seed dormancy; LOCATED IN: DNA replication factor C complex, nucleolus; EXPRESSED IN: 24 plant structures; EXPRESSED DURING: 13 growth stages; CONTAINS InterPro DOMAIN/s: ATPase, AAA+ type, core (InterPro:IPR003593), ATPase, AAA-type, core (InterPro:IPR003959), Replication factor C (InterPro:I…
BnaA08g21770D	0	0	0	27.905	23.9852	15.8377	-	-	-
BnaA08g22240D	0.267932	0.636989	0.200738	4.42262	4.57833	3.35702	AT1G19050	response regulator 7	Encodes a member of the Arabidopsis response regulator (ARR) family, most closely related to ARR15. A two-component response regulator protein containing a phosphate accepting domain in the receiver domain but lacking a DNA binding domain in the output domain. Involved in response to cytokinin and meristem stem cell maintenance. Arr7 protein is stabilized by cytokinin.
BnaA08g22520D	0.914959	0.567589	0.587675	0.273348	0.311813	0.124131	AT1G18630	glycine-rich RNA-binding protein 6	encodes a glycine-rich RNA binding protein.
BnaA08g22660D	0.742381	1.15346	0.718075	0.960384	1.18281	0.541193	AT1G18340	basal transcription factor complex subunit-related	basal transcription factor complex subunit-related; FUNCTIONS IN: general RNA polymerase II transcription factor activity; INVOLVED IN: DNA repair, regulation of transcription, DNA-dependent; LOCATED IN: core TFIIH complex; EXPRESSED IN: 17 plant structures; EXPRESSED DURING: 9 growth stages; CONTAINS InterPro DOMAIN/s: Transcription factor Tfb4 (InterPro:IPR004600); Has 359 Blast hits to 354 pro…
BnaA08g22810D	18.0168	22.4663	35.3539	14.044	10.0175	40.8354	AT1G18060	unknown protein; INVOLVED IN: biological_process unknown; LOCATED IN: chloroplast; EXPRESSED IN: 22 plant structures; EXPRESSED DURING: 13 growth stages; Has 74 Blast hits to 74 proteins in 29 species: Archae - 0; Bacteria - 19; Metazoa - 0; Fungi - 0; Plants - 49; Viruses - 0; Other Eukaryotes - 6 (source: NCBI BLink).	0
BnaA08g22830D	4.70896	3.28584	3.9794	2.52536	2.5741	2.34036	AT1G17980	poly(A) polymerase 1	Encodes a poly(A) polymerase. Located in the nucleus. It limits founder-cell recruitment to organ primordia and suppresses the salicylic acid-independent immune response downstream of EDS1/PAD4.
BnaA08g23390D	2.65595	1.59648	0	9.85367	10.1409	1.93353	AT1G17060	cytochrome p450 72c1	Encodes a protein with similarity to other cytochrome P450's and is a homolog of BAS1. Over expression causes a dwarf phenotype resembling brassinolide resistant mutants. Double mutant analysis of sob7/bas1 loss of function mutants suggests these genes have redundant functions in light responsiveness. SOB7 may function in metabolizing brassinolides. Expressed in leaf, root, stem and silique but e…
BnaA08g23400D	2.5684	2.11795	1.33647	0.270144	0.26355	0	AT1G16960	Ubiquitin domain-containing protein	Ubiquitin domain-containing protein; FUNCTIONS IN: molecular_function unknown; INVOLVED IN: N-terminal protein myristoylation; LOCATED IN: cellular_component unknown; BEST Arabidopsis thaliana protein match is: Ubiquitin domain-containing protein (TAIR:AT1G53400.1); Has 325 Blast hits to 324 proteins in 115 species: Archae - 0; Bacteria - 0; Metazoa - 145; Fungi - 67; Plants - 89; Viruses - 0; Ot…
BnaA08g23840D	0.735325	0.999539	1.07787	0	0.949552	0	AT1G15420	CONTAINS InterPro DOMAIN/s: Small-subunit processome, Utp12 (InterPro:IPR007148); Has 764 Blast hits to 656 proteins in 193 species: Archae - 0; Bacteria - 42; Metazoa - 237; Fungi - 154; Plants - 85; Viruses - 23; Other Eukaryotes - 223 (source: NCBI BLink).	0
BnaA08g23930D	3.70402	3.02717	4.23833	3.03996	2.17368	2.0294	AT1G14560	Mitochondrial substrate carrier family protein	Encodes a mitochondrial CoA transporter.
BnaA08g23990D	8.40441	4.98284	4.35972	9.41868	8.62048	10.0024	AT1G14410	ssDNA-binding transcriptional regulator	Encodes a homolog of the potato p24 protein. Binds single strand telomeric repeats. Negatively regulates telomerase activity and telomere length.
BnaA08g24010D	3.81848	3.03057	2.83369	24.3407	32.2351	24.6075	AT1G14400	ubiquitin carrier protein 1	ubiquitin carrier protein
BnaA08g24030D	0.0179	0.023249	0.0255167	0.025091	0.089015	0.160147	AT1G14340	RNA-binding (RRM/RBD/RNP motifs) family protein	RNA-binding (RRM/RBD/RNP motifs) family protein; FUNCTIONS IN: oxidoreductase activity, nucleotide binding, nucleic acid binding; INVOLVED IN: oxidation reduction; EXPRESSED IN: 22 plant structures; EXPRESSED DURING: 13 growth stages; CONTAINS InterPro DOMAIN/s: Aldo/keto reductase (InterPro:IPR001395), RNA recognition motif, RNP-1 (InterPro:IPR000504), Nucleotide-binding, alpha-beta plait (Inter…
BnaA08g25120D	4.17631	2.03255	1.41534	0	0	0	AT1G11820	O-Glycosyl hydrolases family 17 protein	O-Glycosyl hydrolases family 17 protein; FUNCTIONS IN: cation binding, hydrolase activity, hydrolyzing O-glycosyl compounds, catalytic activity; INVOLVED IN: carbohydrate metabolic process; LOCATED IN: endomembrane system; CONTAINS InterPro DOMAIN/s: Glycoside hydrolase, catalytic core (InterPro:IPR017853), Glycoside hydrolase, family 17 (InterPro:IPR000490), Glycoside hydrolase, subgroup, cataly…
BnaA08g25190D	10.0784	7.38688	7.99875	0	0	0	-	-	-
BnaA08g25520D	52.9983	34.5362	28.637	30.9627	18.5358	15.7916	AT1G10940	Protein kinase superfamily protein	Encodes a plant protein kinase similar to the calcium/calmodulin-dependent protein kinase subfamily and the SNF1 kinase subfamily (SnRK2) whose activity is activated by ionic (salt) and non-ionic (mannitol) osmotic stress. Kinase activity of its homolog in tobacco is induced by hyperosmotic condition within 1 minute.
BnaA08g25560D	1.22103	0.930451	0.86322	1.09071	0.526427	0.534946	AT1G10820	Protein of unknown function (DUF3755)	Protein of unknown function (DUF3755); CONTAINS InterPro DOMAIN/s: Protein of unknown function DUF3755 (InterPro:IPR022228); BEST Arabidopsis thaliana protein match is: Protein of unknown function (DUF3755) (TAIR:AT1G60670.2); Has 155 Blast hits to 155 proteins in 22 species: Archae - 0; Bacteria - 0; Metazoa - 0; Fungi - 0; Plants - 148; Viruses - 0; Other Eukaryotes - 7 (source: NCBI BLink).
BnaA08g25710D	6.46861	4.84882	4.62815	1.80253	1.49084	2.18611	AT1G10510	RNI-like superfamily protein	embryo defective 2004 (emb2004); INVOLVED IN: embryo development ending in seed dormancy; LOCATED IN: mitochondrion, chloroplast, plastid, chloroplast envelope; EXPRESSED IN: 23 plant structures; EXPRESSED DURING: 13 growth stages; BEST Arabidopsis thaliana protein match is: RAN GTPase activating protein 1 (TAIR:AT3G63130.2); Has 21704 Blast hits to 6781 proteins in 315 species: Archae - 0; Bacte…
BnaA08g25920D	1.05834	0.885904	1.55345	19.6318	17.7652	19.6483	.	-	-
BnaA08g26110D	1.27461	0.89787	0.71977	0	0	0	AT1G09830	Glycinamide ribonucleotide (GAR) synthetase	glycinamide ribonucleotide synthetase (GAR synthetase) that catalyzes the conversion of phosphoribosyl amine to phosphoribosyl glycineamide
BnaA08g26910D	30.4939	35.6656	36.1868	6.45401	5.28707	3.835	AT1G08480	predicted to encode subunit 6 of mitochondrial complex II and to participate in the respiratory chain	unknown protein; FUNCTIONS IN: molecular_function unknown; INVOLVED IN: biological_process unknown; LOCATED IN: mitochondrion, plasma membrane, plastid, vacuole; EXPRESSED IN: 27 plant structures; EXPRESSED DURING: 15 growth stages; Has 39 Blast hits to 39 proteins in 13 species: Archae - 0; Bacteria - 0; Metazoa - 0; Fungi - 0; Plants - 39; Viruses - 0; Other Eukaryotes - 0 (source: NCBI BLink).
BnaA08g27280D	0.013504	0.625922	0.0515987	0.00648033	1.56066	0.0555707	AT1G02950	glutathione S-transferase F4	Encodes glutathione transferase belonging to the phi class of GSTs. Naming convention according to Wagner et al. (2002).
BnaA08g28590D	0.0687737	0.094468	0.00883533	1.96537	4.87967	1.96265	-	-	-
BnaA08g28610D	10.178	11.4109	11.9878	9.1481	8.83791	8.51835	AT1G06410	trehalose-phosphatase/synthase 7	Encodes an enzyme putatively involved in trehalose biosynthesis. Though the protein has both trehalose-6-phosphate synthase (TPS)-like and trehalose-6-phosphate phosphatase (TPP)-like domains, neither activity has been detected in enzymatic assays nor has the protein been able to complement yeast TPS or TPP mutants.
BnaA08g28660D	0.0320037	0.104468	0.0577133	0	0	0	-	-	-
BnaA08g29620D	0.444173	0.253904	0.252386	0.682602	0.31592	0.518119	-	-	-
BnaA08g29650D	0.863949	1.22263	1.24406	6.8398	3.52643	2.10663	-	-	-
BnaA08g29800D	0.105742	1.72014	0.88342	0	0	0	AT4G13270	Late embryogenesis abundant (LEA) hydroxyproline-rich glycoprotein family	Late embryogenesis abundant (LEA) hydroxyproline-rich glycoprotein family; FUNCTIONS IN: molecular_function unknown; INVOLVED IN: biological_process unknown; LOCATED IN: chloroplast; EXPRESSED IN: 23 plant structures; EXPRESSED DURING: 13 growth stages; CONTAINS InterPro DOMAIN/s: Late embryogenesis abundant protein, group 2 (InterPro:IPR004864); BEST Arabidopsis thaliana protein match is: Late e…
BnaA08g29860D	0	0	0	0.000864667	0.000261333	0	AT1G50300	TBP-associated factor 15	TBP-associated factor 15 (TAF15); FUNCTIONS IN: RNA binding, nucleotide binding, zinc ion binding, nucleic acid binding; INVOLVED IN: biological_process unknown; LOCATED IN: intracellular; EXPRESSED IN: 22 plant structures; EXPRESSED DURING: 9 growth stages; CONTAINS InterPro DOMAIN/s: RNA recognition motif, RNP-1 (InterPro:IPR000504), Nucleotide-binding, alpha-beta plait (InterPro:IPR012677), Zi…
BnaA08g30740D	1.80567	4.23365	4.02645	15.8318	13.6004	12.6249	AT4G29010	Enoyl-CoA hydratase/isomerase family	Functions in beta-oxidation of fatty acids, similar to CuMFP with L-3-hydroxyacyl-CoA hydrolyase , L-3-hydroxyacyl-dehydrogenase, D-3-hydroxyacyl-CoA epimerase, and 3, 2-enoyl-CoA isomerase activities
BnaA08g30830D	39.3844	16.7312	4.2828	9.26101	1.31054	0.0934433	AT4G25790	CAP (Cysteine-rich secretory proteins, Antigen 5, and Pathogenesis-related 1 protein) superfamily protein	CAP (Cysteine-rich secretory proteins, Antigen 5, and Pathogenesis-related 1 protein) superfamily protein; FUNCTIONS IN: molecular_function unknown; INVOLVED IN: biological_process unknown; LOCATED IN: endomembrane system, extracellular region; EXPRESSED IN: root; CONTAINS InterPro DOMAIN/s: Allergen V5/Tpx-1 related, conserved site (InterPro:IPR018244), Allergen V5/Tpx-1 related (InterPro:IPR001…
BnaA08g31060D	11.661	9.10579	8.55247	1.42922	0.984319	1.2812	.	-	-
BnaA09g00210D	7.36396	36.287	64.6809	3.12053	1.86697	9.89037	-	-	-
BnaA09g00230D	0.00740067	0.042291	0.0380097	0	0.00607833	0.008045	AT4G01060	CAPRICE-like MYB3	Encodes a Myb-related protein similar to CPC. Involved in epidermal cell differentiation. Mutants have reduced numbers of root hairs and increased trichome branching. Involved in endoreduplication. Loss of function mutants are hypertrophic and early flowering.
BnaA09g00650D	0.292648	0.210055	0.189558	0.00654133	0.0391963	0.0162317	AT4G02540	Cysteine/Histidine-rich C1 domain family protein	Cysteine/Histidine-rich C1 domain family protein; FUNCTIONS IN: zinc ion binding; INVOLVED IN: biological_process unknown; LOCATED IN: cellular_component unknown; EXPRESSED IN: 22 plant structures; EXPRESSED DURING: 13 growth stages; CONTAINS InterPro DOMAIN/s: DC1 (InterPro:IPR004146), Zinc finger, PHD-type (InterPro:IPR001965), C1-like (InterPro:IPR011424), Zinc finger, PHD-finger (InterPro:IPR…
BnaA09g00710D	10.0688	9.0613	20.7738	3.8798	1.72491	2.75877	AT4G02280	sucrose synthase 3	Encodes a protein with sucrose synthase activity (SUS3). It appears to be important for sucrose metabolism in developing seeds, especially during the late maturation phase, about 18 days after flowering.
BnaA09g00760D	0.62533	0.720344	0.549191	0.113115	0.36304	0.0542283	AT4G02400	U3 ribonucleoprotein (Utp) family protein	U3 ribonucleoprotein (Utp) family protein; FUNCTIONS IN: molecular_function unknown; INVOLVED IN: rRNA processing; LOCATED IN: small-subunit processome; EXPRESSED IN: 23 plant structures; EXPRESSED DURING: 13 growth stages; CONTAINS InterPro DOMAIN/s: Small-subunit processome, Utp14 (InterPro:IPR006709); BEST Arabidopsis thaliana protein match is: U3 ribonucleoprotein (Utp) family protein (TAIR:A…
BnaA09g00810D	0.630908	0.700215	0.550419	0	0	0	AT4G02540	Cysteine/Histidine-rich C1 domain family protein	Cysteine/Histidine-rich C1 domain family protein; FUNCTIONS IN: zinc ion binding; INVOLVED IN: biological_process unknown; LOCATED IN: cellular_component unknown; EXPRESSED IN: 22 plant structures; EXPRESSED DURING: 13 growth stages; CONTAINS InterPro DOMAIN/s: DC1 (InterPro:IPR004146), Zinc finger, PHD-type (InterPro:IPR001965), C1-like (InterPro:IPR011424), Zinc finger, PHD-finger (InterPro:IPR…
BnaA09g00820D	10.7387	10.2146	10.8996	1.4904	1.72812	1.90519	AT4G02480	AAA-type ATPase family protein	AAA-type ATPase family protein; FUNCTIONS IN: nucleoside-triphosphatase activity, ATPase activity, nucleotide binding, ATP binding; LOCATED IN: chloroplast; EXPRESSED IN: 24 plant structures; EXPRESSED DURING: 14 growth stages; CONTAINS InterPro DOMAIN/s: ATPase, AAA+ type, core (InterPro:IPR003593), ATPase, AAA-type, core (InterPro:IPR003959), SMAD/FHA domain (InterPro:IPR008984), ATPase, AAA-ty…
BnaA09g00900D	31.5541	33.8427	37.4573	7.94425	8.22874	10.7337	AT4G02580	NADH-ubiquinone oxidoreductase 24 kDa subunit, putative	NADH-ubiquinone oxidoreductase 24 kDa subunit, putative; FUNCTIONS IN: NADH dehydrogenase (ubiquinone) activity, zinc ion binding; INVOLVED IN: response to oxidative stress, mitochondrial electron transport, NADH to ubiquinone; LOCATED IN: mitochondrion, mitochondrial respiratory chain complex I, respiratory chain complex I; EXPRESSED IN: 24 plant structures; EXPRESSED DURING: 15 growth stages; C…
BnaA09g01190D	6.4067	7.29749	10.1151	1.04448	1.80975	3.28632	AT4G02980	endoplasmic reticulum auxin binding protein 1	Auxin binding protein involved in cell elongation and cell division. ABP1 is ubiquitinated in vitro and in planta by AtRma2.
BnaA09g01490D	5.5039	6.67567	9.41412	3.62101	3.18111	9.09462	AT4G03320	translocon at the inner envelope membrane of chloroplasts 20-IV	Encodes a component of the TIC (translocon at the inner envelope membrane of chloroplasts) protein translocation machinery mediating the protein translocation across the inner envelope of plastids. The Arabidopsis genome encodes four Tic20 homologous proteins, AT1G04940(Tic20-I), AT2G47840(Tic20-II), AT4G03320(Tic20-IV) and AT5G55710(Tic20-V).
BnaA09g01530D	2.54404	2.0404	1.53487	3.91201	2.15374	2.95535	AT4G03390	STRUBBELIG-receptor family 3	STRUBBELIG-receptor family 3 (SRF3); FUNCTIONS IN: protein serine/threonine kinase activity, kinase activity, ATP binding; INVOLVED IN: transmembrane receptor protein tyrosine kinase signaling pathway, protein amino acid phosphorylation; LOCATED IN: plasma membrane; EXPRESSED IN: 23 plant structures; EXPRESSED DURING: 13 growth stages; CONTAINS InterPro DOMAIN/s: Protein kinase, catalytic domain …
BnaA09g01880D	0.10503	0.0101977	0.00722567	0.558438	0.222655	0.080876	AT3G27050	unknown protein; Has 43 Blast hits to 43 proteins in 17 species: Archae - 0; Bacteria - 0; Metazoa - 0; Fungi - 0; Plants - 40; Viruses - 0; Other Eukaryotes - 3 (source: NCBI BLink).	0
BnaA09g02580D	3.40928	4.41049	2.40432	0.664244	0.0719223	0.568352	AT3G29240	Protein of unknown function (DUF179)	Protein of unknown function (DUF179); FUNCTIONS IN: molecular_function unknown; INVOLVED IN: biological_process unknown; LOCATED IN: chloroplast thylakoid lumen, chloroplast; EXPRESSED IN: 22 plant structures; EXPRESSED DURING: 13 growth stages; CONTAINS InterPro DOMAIN/s: Protein of unknown function DUF179 (InterPro:IPR003774); BEST Arabidopsis thaliana protein match is: Protein of unknown funct…
BnaA09g02830D	4.47596	2.13823	0.975444	0.034263	0.0908623	0	AT5G47920	unknown protein; BEST Arabidopsis thaliana protein match is: unknown protein (TAIR:AT5G13880.1); Has 1807 Blast hits to 1807 proteins in 277 species: Archae - 0; Bacteria - 0; Metazoa - 736; Fungi - 347; Plants - 385; Viruses - 0; Other Eukaryotes - 339 (source: NCBI BLink).	0
BnaA09g03120D	0	0	0	0	0.675802	0	AT5G48720	x-ray induced transcript 1	Encodes XRI1 (X-ray induced 1). Required for post-meiotic stages of pollen development and male and female meiosis. Maybe required for meiotic DNA repair. Inducible by X-ray. Homozygous xri1 mutants are sterile due to extensive chromosome fragmentation.
BnaA09g03280D	7.12242	7.74488	7.80398	1.54324	0.726238	0.689489	AT5G49280	hydroxyproline-rich glycoprotein family protein	hydroxyproline-rich glycoprotein family protein; Has 30201 Blast hits to 17322 proteins in 780 species: Archae - 12; Bacteria - 1396; Metazoa - 17338; Fungi - 3422; Plants - 5037; Viruses - 0; Other Eukaryotes - 2996 (source: NCBI BLink).
BnaA09g03490D	4.26781	5.89022	5.11944	5.53066	7.66855	4.42497	AT5G28830	calcium-binding EF hand family protein	calcium-binding EF hand family protein; FUNCTIONS IN: calcium ion binding; INVOLVED IN: biological_process unknown; LOCATED IN: cellular_component unknown; CONTAINS InterPro DOMAIN/s: Calcium-binding EF-hand (InterPro:IPR002048); BEST Arabidopsis thaliana protein match is: Calcium-binding EF-hand family protein (TAIR:AT4G38810.2); Has 259 Blast hits to 210 proteins in 27 species: Archae - 0; Bact…
BnaA09g03960D	1.59811	2.35911	3.0516	73.8223	103.928	30.4326	-	-	-
BnaA09g04020D	5.35779	2.2418	3.56209	0	0.010901	0.232712	.	-	-
BnaA09g04080D	4.75519	3.73871	3.11799	12.4695	9.50545	6.33385	AT5G26800	FUNCTIONS IN: molecular_function unknown; INVOLVED IN: biological_process unknown; LOCATED IN: mitochondrion; CONTAINS InterPro DOMAIN/s: IGR protein motif (InterPro:IPR019083); BEST Arabidopsis thaliana protein match is: unknown protein (TAIR:AT3G05810.1); Has 1807 Blast hits to 1807 proteins in 277 species: Archae - 0; Bacteria - 0; Metazoa - 736; Fungi - 347; Plants - 385; Viruses - 0; Other E…	0
BnaA09g04120D	0.97295	0.785107	0.80542	2.97828	2.55074	2.42258	AT5G26610	D111/G-patch domain-containing protein	D111/G-patch domain-containing protein; FUNCTIONS IN: zinc ion binding, nucleic acid binding; INVOLVED IN: biological_process unknown; LOCATED IN: intracellular; EXPRESSED IN: 24 plant structures; EXPRESSED DURING: 13 growth stages; CONTAINS InterPro DOMAIN/s: Zinc finger, C2H2-like (InterPro:IPR015880), Zinc finger, C2H2-type (InterPro:IPR007087), D111/G-patch (InterPro:IPR000467), Zinc finger, …
BnaA09g04520D	3.46295	1.36672	3.52702	0.115252	0.0144713	0.0782923	AT5G25610	BURP domain-containing protein	responsive to dehydration 22 (RD22) mediated by ABA
BnaA09g05110D	4.05587	0.849881	0.501477	2.4931	1.5633	0.710416	AT5G23900	Ribosomal protein L13e family protein	Ribosomal protein L13e family protein; FUNCTIONS IN: structural constituent of ribosome; INVOLVED IN: translation, ribosome biogenesis; LOCATED IN: cytosolic ribosome, ribosome, cytosolic large ribosomal subunit, membrane; EXPRESSED IN: 24 plant structures; EXPRESSED DURING: 13 growth stages; CONTAINS InterPro DOMAIN/s: Ribosomal protein L13e, conserved site (InterPro:IPR018256), Ribosomal protei…
BnaA09g05120D	1.74965	1.52739	2.96167	0	0	0	AT5G23890	LOCATED IN: mitochondrion, chloroplast thylakoid membrane, chloroplast, plastid, chloroplast envelope; EXPRESSED IN: 24 plant structures; EXPRESSED DURING: 14 growth stages; CONTAINS InterPro DOMAIN/s: S-layer homology domain (InterPro:IPR001119); BEST Arabidopsis thaliana protein match is: unknown protein (TAIR:AT5G52410.2); Has 1807 Blast hits to 1807 proteins in 277 species: Archae - 0; Bacter…	0
BnaA09g05160D	0	0	0	0.0237933	0.071825	0.0750453	-	-	-
BnaA09g05800D	0.211758	0.312781	0.055651	0	0	0	AT5G61770	PETER PAN-like protein	PETER PAN-like protein (PPAN); CONTAINS InterPro DOMAIN/s: Brix domain (InterPro:IPR007109); Has 946 Blast hits to 859 proteins in 217 species: Archae - 0; Bacteria - 10; Metazoa - 449; Fungi - 173; Plants - 58; Viruses - 18; Other Eukaryotes - 238 (source: NCBI BLink).
BnaA09g05980D	0.952095	0.9076	0.893568	12.4056	13.8392	8.69318	-	-	-
BnaA09g07300D	1.87229	2.86707	5.39554	0.423345	1.40978	2.78891	AT5G67560	ADP-ribosylation factor-like A1D	A member of ARF-like GTPase family. A thaliana has 21 members, in two subfamilies, ARF and ARF-like (ARL) GTPases. Possible pseudogene because it lacks an N-terminal part that is conserved among the other ARL8 proteins.
BnaA09g07560D	1.39987	1.34038	1.40754	2.25229	2.20824	2.60694	AT5G67170	SEC-C motif-containing protein / OTU-like cysteine protease family protein	SEC-C motif-containing protein / OTU-like cysteine protease family protein; CONTAINS InterPro DOMAIN/s: Ovarian tumour, otubain (InterPro:IPR003323), SEC-C motif (InterPro:IPR004027); BEST Arabidopsis thaliana protein match is: OTU-like cysteine protease family protein (TAIR:AT2G27350.6); Has 2803 Blast hits to 2797 proteins in 825 species: Archae - 0; Bacteria - 1391; Metazoa - 518; Fungi - 199;…
BnaA09g08130D	28.3296	48.2531	26.5198	7.12761	9.5712	4.40557	AT5G66040	sulfurtransferase protein 16	Encodes a protein with thiosulfate sulfurtransferase/rhodanese activity in vitro, however, it is likely to use a substrate other than thiosulfate or 3-mercaptopyruvate in vivo.
BnaA09g09110D	3.18522	4.24607	4.27032	0.278672	0.213905	0.235198	AT2G17420	NADPH-dependent thioredoxin reductase A	NADPH-dependent thioredoxin reductase, major cytosolic isoform
BnaA09g09130D	2.95094	2.36722	2.63705	0.817758	0.767071	0.945695	AT2G17440	plant intracellular ras group-related LRR 5	Encodes PIRL5, a member of the Plant Intracellular Ras-group-related LRRs (Leucine rich repeat proteins). PIRLs are a distinct, plant-specific class of intracellular LRRs that likely mediate protein interactions, possibly in the context of signal transduction.
BnaA09g09930D	0.027783	0.011743	0.013305	0	0	0	AT2G19660	Cysteine/Histidine-rich C1 domain family protein	Cysteine/Histidine-rich C1 domain family protein; FUNCTIONS IN: molecular_function unknown; INVOLVED IN: intracellular signaling pathway; LOCATED IN: cellular_component unknown; EXPRESSED IN: root, carpel; EXPRESSED DURING: petal differentiation and expansion stage; CONTAINS InterPro DOMAIN/s: Protein kinase C-like, phorbol ester/diacylglycerol binding (InterPro:IPR002219), DC1 (InterPro:IPR00414…
BnaA09g10380D	28.7923	21.6997	17.1411	12.8557	10.746	7.03499	AT3G24830	Ribosomal protein L13 family protein	Ribosomal protein L13 family protein; FUNCTIONS IN: structural constituent of ribosome; INVOLVED IN: translation; LOCATED IN: cytosolic ribosome, cytosolic large ribosomal subunit, large ribosomal subunit, membrane; EXPRESSED IN: 22 plant structures; EXPRESSED DURING: 13 growth stages; CONTAINS InterPro DOMAIN/s: Ribosomal protein L13 (InterPro:IPR005822), Ribosomal protein L13, eukaryotic/archae…
BnaA09g10740D	0.0929973	0.058527	0.0305577	11.9569	11.1458	6.13116	.	-	-
BnaA09g11290D	1.99289	4.19227	5.90708	0.338087	0.856041	0.596548	AT1G63930	from the Czech 'roh' meaning 'corner'	from the Czech 'roh' meaning 'corner' (ROH1); CONTAINS InterPro DOMAIN/s: Protein BYPASS related (InterPro:IPR008511); BEST Arabidopsis thaliana protein match is: Protein of unknown function (DUF793) (TAIR:AT4G23530.1); Has 150 Blast hits to 147 proteins in 21 species: Archae - 0; Bacteria - 0; Metazoa - 3; Fungi - 1; Plants - 145; Viruses - 0; Other Eukaryotes - 1 (source: NCBI BLink).
BnaA09g12920D	0.137901	0.371617	0.116496	0.728543	0.883501	0.708217	AT1G63100	GRAS family transcription factor	GRAS family transcription factor; CONTAINS InterPro DOMAIN/s: Transcription factor GRAS (InterPro:IPR005202); BEST Arabidopsis thaliana protein match is: GRAS family transcription factor (TAIR:AT3G54220.1); Has 2506 Blast hits to 2453 proteins in 309 species: Archae - 0; Bacteria - 4; Metazoa - 16; Fungi - 0; Plants - 2441; Viruses - 0; Other Eukaryotes - 45 (source: NCBI BLink).
BnaA09g14060D	0.0476477	0	0.0108017	0.598049	0.396173	0.350811	.	-	-
BnaA09g15710D	0.518018	10.3037	0.925304	19.3223	127.581	56.7075	-	-	-
BnaA09g16470D	3.65267	8.39886	6.926	0.0379867	0.026564	0.0465457	.	-	-
BnaA09g16590D	9.1288	4.3994	2.45473	6.83801	2.42878	1.93637	AT5G43700	AUX/IAA transcriptional regulator family protein	Auxin inducible protein similar to transcription factors.
BnaA09g16630D	30.5839	41.9646	48.8995	4.1723	4.41347	9.59214	AT5G43850	RmlC-like cupins superfamily protein	ARD4; FUNCTIONS IN: acireductone dioxygenase [iron(II)-requiring] activity, metal ion binding; INVOLVED IN: L-methionine salvage from methylthioadenosine, oxidation reduction; LOCATED IN: cellular_component unknown; EXPRESSED IN: 22 plant structures; EXPRESSED DURING: 13 growth stages; CONTAINS InterPro DOMAIN/s: Acireductone dioxygenase, ARD (InterPro:IPR004313), Cupin, RmlC-type (InterPro:IPR01…
BnaA09g16850D	0.469251	0.419256	0	2.72215	5.46314	0.828221	AT5G44020	HAD superfamily, subfamily IIIB acid phosphatase	HAD superfamily, subfamily IIIB acid phosphatase ; FUNCTIONS IN: acid phosphatase activity; INVOLVED IN: biological_process unknown; LOCATED IN: chloroplast, vacuole, membrane; EXPRESSED IN: 23 plant structures; EXPRESSED DURING: 13 growth stages; CONTAINS InterPro DOMAIN/s: Acid phosphatase (Class B) (InterPro:IPR005519), Vegetative storage protein/acid phosphatase (InterPro:IPR014403), Acid pho…
BnaA09g17860D	0.0196177	0.007844	0	0.0241297	0.0293803	0.0412747	-	-	-
BnaA09g17870D	0	7.96667e-05	0	0.022483	0.004968	0.000480333	AT5G46160	Ribosomal protein L14p/L23e family protein	Ribosomal protein L14p/L23e family protein; FUNCTIONS IN: structural constituent of ribosome; INVOLVED IN: translation; LOCATED IN: ribosome, intracellular, large ribosomal subunit; EXPRESSED IN: 22 plant structures; EXPRESSED DURING: 13 growth stages; CONTAINS InterPro DOMAIN/s: Ribosomal protein L14, bacterial-type (InterPro:IPR005745), Ribosomal protein L14b/L23e (InterPro:IPR000218), Ribosoma…
BnaA09g19200D	2.39591	0.982106	0.642248	0.089647	0	0	AT2G03260	EXS (ERD1/XPR1/SYG1) family protein	EXS (ERD1/XPR1/SYG1) family protein; LOCATED IN: integral to membrane; EXPRESSED IN: shoot apex, root; CONTAINS InterPro DOMAIN/s: SPX, N-terminal (InterPro:IPR004331), EXS, C-terminal (InterPro:IPR004342); BEST Arabidopsis thaliana protein match is: EXS (ERD1/XPR1/SYG1) family protein (TAIR:AT1G14040.1); Has 1118 Blast hits to 1057 proteins in 200 species: Archae - 0; Bacteria - 0; Metazoa - 258…
BnaA09g19490D	0	0.50264	0	68.7158	42.3826	1.75438	.	-	-
BnaA09g20480D	0	0	0.001015	0.0295867	0.02302	0.0342213	-	-	-
BnaA09g21120D	0.664986	0.745546	0.444732	0.0159693	0.014094	0.010056	AT4G12070	unknown protein; INVOLVED IN: biological_process unknown; LOCATED IN: plasma membrane; EXPRESSED IN: 22 plant structures; EXPRESSED DURING: 13 growth stages; Has 30201 Blast hits to 17322 proteins in 780 species: Archae - 12; Bacteria - 1396; Metazoa - 17338; Fungi - 3422; Plants - 5037; Viruses - 0; Other Eukaryotes - 2996 (source: NCBI BLink).	0
BnaA09g21800D	14.7677	22.0587	11.9901	3.15246	6.05039	2.39323	AT4G11370	RING-H2 finger A1A	Encodes a putative RING-H2 finger protein RHA1a.
BnaA09g21880D	0.116961	0.0905833	0.077149	0	0.267313	0.692884	AT4G11260	phosphatase-related	Functions in plant disease resistance signaling, SCF(TIR1) mediated degradation of Aux/IAA proteins and HSP90 mediated degradation of R resistance proteins. AtSGT1a and AtSGT1b are functionally redundant in the resistance to pathogenes. AtSGT1b was more highly expressed than AtSGT1. The N-terminal TPR domain of AtSGT1a reduces the steady-state level of Arabidopsis SGT1 proteins whereas the same d…
BnaA09g21890D	9.67817	8.27491	7.20055	3.90553	4.83881	2.30582	AT4G11240	Calcineurin-like metallo-phosphoesterase superfamily protein	encodes a type I serine/threonine protein phosphatase expressed in expressed in roots, rosettes and flowers.
BnaA09g21920D	0.100633	0.13332	0.0522297	0	0	0	AT4G11220	VIRB2-interacting protein 2	VIRB2-interacting protein 2 (BTI2); INVOLVED IN: biological_process unknown; LOCATED IN: endoplasmic reticulum, plasma membrane, endoplasmic reticulum membrane; EXPRESSED IN: 26 plant structures; EXPRESSED DURING: 16 growth stages; CONTAINS InterPro DOMAIN/s: Reticulon (InterPro:IPR003388); BEST Arabidopsis thaliana protein match is: VIRB2-interacting protein 1 (TAIR:AT4G23630.1); Has 1807 Blast …
BnaA09g21970D	5.23615	3.29053	3.01606	0.0680227	0	0.0287547	.	-	-
BnaA09g22230D	0.718355	0.515357	0.377689	0.236272	0.320814	0.193131	AT4G10890	unknown protein; CONTAINS InterPro DOMAIN/s: Protein of unknown function DUF2439 (InterPro:IPR018838); BEST Arabidopsis thaliana protein match is: unknown protein (TAIR:AT1G43722.1); Has 30201 Blast hits to 17322 proteins in 780 species: Archae - 12; Bacteria - 1396; Metazoa - 17338; Fungi - 3422; Plants - 5037; Viruses - 0; Other Eukaryotes - 2996 (source: NCBI BLink).	0
BnaA09g22320D	3.20263	4.80847	3.67379	1.12489	1.11777	0.925475	AT4G10810	unknown protein; FUNCTIONS IN: molecular_function unknown; INVOLVED IN: biological_process unknown; LOCATED IN: chloroplast; EXPRESSED IN: 23 plant structures; EXPRESSED DURING: 15 growth stages; BEST Arabidopsis thaliana protein match is: unknown protein (TAIR:AT4G24026.1); Has 1807 Blast hits to 1807 proteins in 277 species: Archae - 0; Bacteria - 0; Metazoa - 736; Fungi - 347; Plants - 385; Vi…	0
BnaA09g22370D	0.0122267	0.007208	4.53333e-05	9.4e-05	5.03333e-05	4.56667e-05	-	-	-
BnaA09g22470D	0.309495	0.123801	0.100707	11.8517	10.3837	8.98486	AT4G10610	CTC-interacting domain 12	RNA-binding protein, putative. Member of a family of proteins having an PABC binding domain (PAM motif).
BnaA09g22810D	0	0.00979	0	0	1.49246	0	AT4G09820	basic helix-loop-helix (bHLH) DNA-binding superfamily protein	TT8 is a regulation factor that acts in a concerted action with TT1, PAP1 and TTG1 on the regulation of flavonoid pathways, namely proanthocyanidin and anthocyanin biosynthesis. Affects dihydroflavonol 4-reductase gene expression. It is thought that a ternary complex composed of TT2, TT8 and TTG1 is necessary for correct expression of BAN in seed endothelium. Also important for important for marg…
BnaA09g23050D	5.13631	20.0962	44.7403	0.00923967	0	1.43033	AT4G09350	Chaperone DnaJ-domain superfamily protein	Chaperone DnaJ-domain superfamily protein; FUNCTIONS IN: heat shock protein binding; INVOLVED IN: protein folding; LOCATED IN: chloroplast; EXPRESSED IN: 21 plant structures; EXPRESSED DURING: 13 growth stages; CONTAINS InterPro DOMAIN/s: Molecular chaperone, heat shock protein, Hsp40, DnaJ (InterPro:IPR015609), Heat shock protein DnaJ, N-terminal (InterPro:IPR001623), Heat shock protein DnaJ, co…
BnaA09g23150D	1.49381	1.47957	0.745993	0	0	0	-	-	-
BnaA09g23170D	0	0	0	0.224053	0.246908	0.399707	AT1G34220	Regulator of Vps4 activity in the MVB pathway protein	Regulator of Vps4 activity in the MVB pathway protein; CONTAINS InterPro DOMAIN/s: Protein of unknown function DUF292, eukaryotic (InterPro:IPR005061); BEST Arabidopsis thaliana protein match is: Regulator of Vps4 activity in the MVB pathway protein (TAIR:AT4G35730.1); Has 2168 Blast hits to 1128 proteins in 249 species: Archae - 0; Bacteria - 95; Metazoa - 396; Fungi - 227; Plants - 323; Viruses…
BnaA09g23550D	4.19778	5.36981	13.4386	1.35532	0	0	AT1G33700	Beta-glucosidase, GBA2 type family protein	Beta-glucosidase, GBA2 type family protein; FUNCTIONS IN: catalytic activity, glucosylceramidase activity; INVOLVED IN: glucosylceramide catabolic process, sphingolipid metabolic process; LOCATED IN: vacuole; EXPRESSED IN: 8 plant structures; EXPRESSED DURING: 4 anthesis, petal differentiation and expansion stage; CONTAINS InterPro DOMAIN/s: Glucosylceramidase (InterPro:IPR006775), Six-hairpin gl…
BnaA09g23770D	1.73367	0.564864	0.520041	0.114701	0.046967	0.0922647	.	-	-
BnaA09g23980D	2.32228	1.39643	0.256154	18.1589	43.097	12.0884	AT1G33055	unknown protein; FUNCTIONS IN: molecular_function unknown; INVOLVED IN: anaerobic respiration; LOCATED IN: endomembrane system; EXPRESSED IN: 13 plant structures; EXPRESSED DURING: 6 growth stages; Has 20 Blast hits to 20 proteins in 8 species: Archae - 0; Bacteria - 0; Metazoa - 0; Fungi - 0; Plants - 20; Viruses - 0; Other Eukaryotes - 0 (source: NCBI BLink).	0
BnaA09g24090D	0	0	0	7.31968	8.19576	11.5638	-	-	-
BnaA09g24200D	0	0	0	0.352229	0.355271	0.145547	.	-	-
BnaA09g24650D	0	0	0	0.44796	0.541004	2.33378	AT1G32100	pinoresinol reductase 1	Encodes a pinoresinol reductase involved in lignan biosynthesis. Expressed strongly in roots and less strongly in stems. Shows specificity for pinoresinol and not lariciresinol.
BnaA09g27160D	0	0.00101267	0	0.0828817	0.006216	0.0558893	.	-	-
BnaA09g27730D	0	0	0	2.62535	3.08636	2.30953	AT1G27840	Transducin/WD40 repeat-like superfamily protein	Encodes a DDB1a interacting protein ATCSA-1 required for UV-B tolerance and genomic integrity.
BnaA09g27980D	0.347891	0.496667	0.72178	0.182175	0.257927	0.232696	AT1G27350	Ribosome associated membrane protein RAMP4	Ribosome associated membrane protein RAMP4; CONTAINS InterPro DOMAIN/s: Ribosome associated membrane RAMP4 (InterPro:IPR010580); BEST Arabidopsis thaliana protein match is: Ribosome associated membrane protein RAMP4 (TAIR:AT1G27330.1); Has 348 Blast hits to 348 proteins in 106 species: Archae - 0; Bacteria - 0; Metazoa - 210; Fungi - 0; Plants - 100; Viruses - 0; Other Eukaryotes - 38 (source: NC…
BnaA09g28050D	0.331024	0.481714	0.554045	0.0131277	0.008832	0	.	-	-
BnaA09g28060D	0.743833	0.891701	1.34183	0.253788	0.341641	0.482662	AT1G24267	Protein of unknown function (DUF1664)	Protein of unknown function (DUF1664); FUNCTIONS IN: molecular_function unknown; INVOLVED IN: biological_process unknown; LOCATED IN: cellular_component unknown; EXPRESSED IN: cultured cell; CONTAINS InterPro DOMAIN/s: Protein of unknown function DUF1664 (InterPro:IPR012458); BEST Arabidopsis thaliana protein match is: Protein of unknown function (DUF1664) (TAIR:AT1G24265.2); Has 154 Blast hits t…
BnaA09g28310D	0.295936	0.0346823	0.187168	0	0	0	.	-	-
BnaA09g28400D	0	0.0329257	0.0634313	4.35495	16.0138	17.4324	AT1G25275	unknown protein; FUNCTIONS IN: molecular_function unknown; INVOLVED IN: response to karrikin; LOCATED IN: endomembrane system; EXPRESSED IN: 23 plant structures; EXPRESSED DURING: 13 growth stages; Has 18 Blast hits to 18 proteins in 4 species: Archae - 0; Bacteria - 0; Metazoa - 0; Fungi - 0; Plants - 18; Viruses - 0; Other Eukaryotes - 0 (source: NCBI BLink).	0
BnaA09g29500D	4.50586	1.39985	2.15897	1.59018	1.20351	1.22812	AT1G27070	5'-AMP-activated protein kinase-related	5'-AMP-activated protein kinase-related; BEST Arabidopsis thaliana protein match is: 5'-AMP-activated protein kinase-related (TAIR:AT5G03420.1); Has 814 Blast hits to 789 proteins in 227 species: Archae - 3; Bacteria - 97; Metazoa - 231; Fungi - 191; Plants - 199; Viruses - 0; Other Eukaryotes - 93 (source: NCBI BLink).
BnaA09g31190D	0.0156103	0.0311287	0.0121163	5.08924	4.46058	2.87584	-	-	-
BnaA09g33190D	0.0389443	0.0318353	0	0.0732807	0.387868	0.071731	AT3G52780	Purple acid phosphatases superfamily protein	PAP20; FUNCTIONS IN: protein serine/threonine phosphatase activity, acid phosphatase activity; INVOLVED IN: biological_process unknown; LOCATED IN: endomembrane system; EXPRESSED IN: 10 plant structures; EXPRESSED DURING: 4 anthesis, petal differentiation and expansion stage; CONTAINS InterPro DOMAIN/s: Metallophosphoesterase (InterPro:IPR004843), Purple acid phosphatase-like, N-terminal (InterPr…
BnaA09g35980D	0	0	0	0.847375	2.62257	1.36631	AT3G56580	RING/U-box superfamily protein	Encodes a functional E3 ubiquitin ligase involved in the dehydration stress response and regulation of proline biosynthesis.
BnaA09g36280D	0.0290193	0	0.013813	1.19788	0.716463	0.601152	.	-	-
BnaA09g36390D	0	0	0	0.398174	0.286716	0.652648	AT3G57050	cystathionine beta-lyase	Encodes second enzyme in the methionine biosynthetic pathway
BnaA09g37290D	6.1188	8.07356	7.45324	10.0755	9.18405	12.4923	AT3G58140	phenylalanyl-tRNA synthetase class IIc family protein	phenylalanyl-tRNA synthetase class IIc family protein; FUNCTIONS IN: in 6 functions; INVOLVED IN: tRNA processing, phenylalanyl-tRNA aminoacylation, translation, tRNA aminoacylation, tRNA aminoacylation for protein translation; LOCATED IN: mitochondrion, chloroplast, membrane; EXPRESSED IN: 23 plant structures; EXPRESSED DURING: 13 growth stages; CONTAINS InterPro DOMAIN/s: Phenylalanyl-tRNA synt…
BnaA09g37720D	0.000420667	0.00299233	0.00330833	0.0489637	0.0513917	0.0366333	-	-	-
BnaA09g38020D	0	0	0	0.376552	0.145362	0.119777	AT3G59810	Small nuclear ribonucleoprotein family protein	Small nuclear ribonucleoprotein family protein; CONTAINS InterPro DOMAIN/s: Like-Sm ribonucleoprotein (LSM) domain (InterPro:IPR001163), Like-Sm ribonucleoprotein (LSM) domain, eukaryotic/archaea-type (InterPro:IPR006649), Like-Sm ribonucleoprotein (LSM)-related domain (InterPro:IPR010920); BEST Arabidopsis thaliana protein match is: Small nuclear ribonucleoprotein family protein (TAIR:AT2G43810.…
BnaA09g38280D	0.60516	0.260593	0.307556	2.71149	3.16009	1.33922	AT3G60200	unknown protein; BEST Arabidopsis thaliana protein match is: unknown protein (TAIR:AT2G44600.1); Has 60 Blast hits to 60 proteins in 12 species: Archae - 0; Bacteria - 0; Metazoa - 8; Fungi - 0; Plants - 51; Viruses - 0; Other Eukaryotes - 1 (source: NCBI BLink).	0
BnaA09g39810D	0.540955	0.0594283	0.041674	0.199656	0.206892	0.248472	AT3G62330	Zinc knuckle (CCHC-type) family protein	Zinc knuckle (CCHC-type) family protein; FUNCTIONS IN: zinc ion binding, nucleic acid binding; INVOLVED IN: biological_process unknown; LOCATED IN: cellular_component unknown; EXPRESSED IN: 22 plant structures; EXPRESSED DURING: 13 growth stages; CONTAINS InterPro DOMAIN/s: Zinc finger, CCHC-type (InterPro:IPR001878); Has 1256 Blast hits to 1123 proteins in 138 species: Archae - 0; Bacteria - 13;…
BnaA09g39850D	57.6009	61.4052	86.2012	144.992	147.391	144.058	AT3G62400	unknown protein; Has 30201 Blast hits to 17322 proteins in 780 species: Archae - 12; Bacteria - 1396; Metazoa - 17338; Fungi - 3422; Plants - 5037; Viruses - 0; Other Eukaryotes - 2996 (source: NCBI BLink).	0
BnaA09g40160D	8.93456	8.09038	8.18762	1.91315	1.18416	0.686339	AT3G62810	complex 1 family protein / LVR family protein	complex 1 family protein / LVR family protein; Has 30201 Blast hits to 17322 proteins in 780 species: Archae - 12; Bacteria - 1396; Metazoa - 17338; Fungi - 3422; Plants - 5037; Viruses - 0; Other Eukaryotes - 2996 (source: NCBI BLink).
BnaA09g40230D	4.99297	3.84544	3.20531	2.23342	1.74128	0.936538	.	-	-
BnaA09g40250D	1.19592	1.96615	3.11956	0	0	0	-	-	-
BnaA09g40660D	3.5995	3.26068	2.67091	1.26308	0	0	AT2G26140	FTSH protease 4	encodes an FtsH protease that is localized to the mitochondrion
BnaA09g40740D	8.71604	2.0718	1.51244	0.052487	0.0756743	0.0380927	AT2G25770	Polyketide cyclase/dehydrase and lipid transport superfamily protein	Polyketide cyclase/dehydrase and lipid transport superfamily protein; CONTAINS InterPro DOMAIN/s: Polyketide cyclase/dehydrase (InterPro:IPR019587); BEST Arabidopsis thaliana protein match is: Polyketide cyclase/dehydrase and lipid transport superfamily protein (TAIR:AT4G32870.1); Has 173 Blast hits to 173 proteins in 49 species: Archae - 0; Bacteria - 50; Metazoa - 0; Fungi - 0; Plants - 119; Vi…
BnaA09g40910D	0.118043	0.11862	0.054676	1.18793	0.535469	0.381898	AT2G25530	AFG1-like ATPase family protein	AFG1-like ATPase family protein; FUNCTIONS IN: ATPase activity, ATP binding; INVOLVED IN: biological_process unknown; LOCATED IN: cellular_component unknown; EXPRESSED IN: 23 plant structures; EXPRESSED DURING: 14 growth stages; CONTAINS InterPro DOMAIN/s: ATPase, AFG1-like (InterPro:IPR005654); BEST Arabidopsis thaliana protein match is: AFG1-like ATPase family protein (TAIR:AT4G28070.2); Has 38…
BnaA09g41060D	0.02224	0.006189	0	0	0	0.006158	.	-	-
BnaA09g41220D	4.15756	4.90064	4.36674	19.9653	19.9836	16.1181	.	-	-
BnaA09g41230D	8.71291	12.1095	11.32	24.6098	22.5108	19.7929	AT2G24765	ADP-ribosylation factor 3	GTPase required for Golgi targeting of GRIP domain proteins. AtARL1 binds directly to the GRIP domain of AtGRIP in a GTP-dependent manner
BnaA09g42030D	0.494	0.382088	0.24459	8.76663	6.19987	3.21282	AT2G23350	poly(A) binding protein 4	polyadenylate-binding protein, putative / PABP, putative.Member of the Class II family of PABP proteins. Highly and ubiquitously expressed.
BnaA09g42380D	8.83592	2.30701	1.06388	15.1012	5.91137	3.00105	.	-	-
BnaA09g42640D	3.04088	4.22415	3.39412	27.6989	30.8549	16.4127	AT2G22425	Microsomal signal peptidase 12 kDa subunit (SPC12)	Microsomal signal peptidase 12 kDa subunit (SPC12); FUNCTIONS IN: peptidase activity; INVOLVED IN: signal peptide processing; LOCATED IN: endomembrane system, signal peptidase complex, integral to membrane; EXPRESSED IN: 22 plant structures; EXPRESSED DURING: 13 growth stages; CONTAINS InterPro DOMAIN/s: Microsomal signal peptidase 12kDa subunit (InterPro:IPR009542); BEST Arabidopsis thaliana pro…
BnaA09g42790D	0.999101	1.62773	0.271395	17.267	3.32178	4.97895	AT2G22170	Lipase/lipooxygenase, PLAT/LH2 family protein	Lipase/lipooxygenase, PLAT/LH2 family protein; FUNCTIONS IN: molecular_function unknown; INVOLVED IN: biological_process unknown; LOCATED IN: thylakoid, chloroplast, membrane; EXPRESSED IN: 19 plant structures; EXPRESSED DURING: 13 growth stages; CONTAINS InterPro DOMAIN/s: Lipoxygenase, LH2 (InterPro:IPR001024), Lipase/lipooxygenase, PLAT/LH2 (InterPro:IPR008976); BEST Arabidopsis thaliana prote…
BnaA09g42960D	1.23423	1.25446	1.1277	4.17344	3.07206	3.09323	AT2G21710	Mitochondrial transcription termination factor family protein	embryo defective 2219 (EMB2219); INVOLVED IN: embryo development ending in seed dormancy; LOCATED IN: cellular_component unknown; EXPRESSED IN: 9 plant structures; EXPRESSED DURING: LP.04 four leaves visible, F mature embryo stage, petal differentiation and expansion stage, E expanded cotyledon stage, D bilateral stage; CONTAINS InterPro DOMAIN/s: Mitochodrial transcription termination factor-rel…
BnaA09g43250D	8.35362	5.58189	4.46573	40.2476	37.9142	21.0204	AT2G21290	unknown protein; FUNCTIONS IN: molecular_function unknown; INVOLVED IN: biological_process unknown; LOCATED IN: mitochondrion; EXPRESSED IN: 22 plant structures; EXPRESSED DURING: 13 growth stages; Has 63 Blast hits to 63 proteins in 12 species: Archae - 0; Bacteria - 0; Metazoa - 0; Fungi - 0; Plants - 63; Viruses - 0; Other Eukaryotes - 0 (source: NCBI BLink).	0
BnaA09g44440D	0.0213433	0.0106497	0.0539803	0.00554667	0.0337177	0.00524367	AT1G18860	WRKY DNA-binding protein 61	member of WRKY Transcription Factor; Group II-b
BnaA09g44770D	0	0	0.0102413	1.0258	2.37994	0.599905	AT1G18130	Class II aaRS and biotin synthetases superfamily protein	Class II aaRS and biotin synthetases superfamily protein; FUNCTIONS IN: threonine-tRNA ligase activity, aminoacyl-tRNA ligase activity, ATP binding; INVOLVED IN: threonyl-tRNA aminoacylation, translation; LOCATED IN: membrane; EXPRESSED IN: leaf; CONTAINS InterPro DOMAIN/s: Anticodon-binding (InterPro:IPR004154), Threonyl-tRNA synthetase, class IIa, conserved region (InterPro:IPR018158); BEST Ara…
BnaA09g45430D	4.23389	6.69843	8.00132	0	0	0	AT1G14830	DYNAMIN-like 1C	Encodes a dynamin-like protein that is involved in mitochondrial morphogenesis and pollen development. Protein is localized as speckles in the cytoplasm, partially co-localizes with mitochondrial markers, cell plate of dividing cells, and the tip of root hairs, root cap cells, and expanding part of trichoblasts.
BnaA09g45460D	0	0.345142	0.88215	0	0	0	AT1G14780	MAC/Perforin domain-containing protein	MAC/Perforin domain-containing protein; CONTAINS InterPro DOMAIN/s: Membrane attack complex component/perforin (MACPF) domain (InterPro:IPR020864); BEST Arabidopsis thaliana protein match is: MAC/Perforin domain-containing protein (TAIR:AT4G24290.2); Has 221 Blast hits to 220 proteins in 25 species: Archae - 0; Bacteria - 0; Metazoa - 19; Fungi - 0; Plants - 202; Viruses - 0; Other Eukaryotes - 0…
BnaA09g45510D	10.6834	8.82899	13.0086	0.964848	0.593473	2.18657	AT1G14720	xyloglucan endotransglucosylase/hydrolase 28	member of Glycoside Hydrolase Family 16
BnaA09g45520D	0.000704667	0	0	0	0	0	AT1G14710	hydroxyproline-rich glycoprotein family protein	hydroxyproline-rich glycoprotein family protein; BEST Arabidopsis thaliana protein match is: oxidoreductase, 2OG-Fe(II) oxygenase family protein (TAIR:AT4G02940.1); Has 6006 Blast hits to 3456 proteins in 374 species: Archae - 2; Bacteria - 410; Metazoa - 1957; Fungi - 511; Plants - 1958; Viruses - 385; Other Eukaryotes - 783 (source: NCBI BLink).
BnaA09g45540D	0.0363433	0.776106	0	0.322189	0.191607	0	AT1G14690	microtubule-associated protein 65-7	microtubule-associated protein 65-7 (MAP65-7); CONTAINS InterPro DOMAIN/s: Microtubule-associated protein, MAP65/ASE1-type (InterPro:IPR007145); BEST Arabidopsis thaliana protein match is: Microtubule associated protein (MAP65/ASE1) family protein (TAIR:AT2G01910.1); Has 3902 Blast hits to 3379 proteins in 390 species: Archae - 69; Bacteria - 268; Metazoa - 1928; Fungi - 367; Plants - 438; Viruse…
BnaA09g45620D	0.262732	0.348797	0.206408	9.57735	6.97024	2.32367	AT1G14320	Ribosomal protein L16p/L10e family protein	Encodes a ribosomal protein L10 and may be involved in translation regulation. Semi-dominant mutations in SAC552 can suppress defects in acaulis5, which encodes a thermospermine synthase, by enhancing translation of acl5 and itself.
BnaA09g45650D	0.187486	0.070063	0.0780723	1.83549	2.02898	0.446823	.	-	-
BnaA09g46280D	0.181885	0	0	0.0124133	0.142836	0	.	-	-
BnaA09g46480D	8.25397	5.69053	4.81347	0.0983947	0.151559	0.152757	.	-	-
BnaA09g46780D	255.109	331.255	326.69	76.9166	44.5363	194.639	AT1G12900	glyceraldehyde 3-phosphate dehydrogenase A subunit 2	glyceraldehyde 3-phosphate dehydrogenase A subunit 2 (GAPA-2); FUNCTIONS IN: NAD or NADH binding, glyceraldehyde-3-phosphate dehydrogenase activity; INVOLVED IN: oxidation reduction, glycolysis, glucose metabolic process; LOCATED IN: apoplast, chloroplast stroma, chloroplast, membrane, chloroplast envelope; EXPRESSED IN: 24 plant structures; EXPRESSED DURING: 14 growth stages; CONTAINS InterPro D…
BnaA09g46850D	0.00454833	0.0217153	0.0372447	6.22754	8.15259	7.22873	AT1G12760	Zinc finger, C3HC4 type (RING finger) family protein	Zinc finger, C3HC4 type (RING finger) family protein; FUNCTIONS IN: ubiquitin-protein ligase activity, zinc ion binding; LOCATED IN: chloroplast; CONTAINS InterPro DOMAIN/s: Zinc finger, RING-type (InterPro:IPR001841), Zinc finger, C3HC4 RING-type (InterPro:IPR018957); BEST Arabidopsis thaliana protein match is: Zinc finger, C3HC4 type (RING finger) family protein (TAIR:AT1G63170.1); Has 9873 Bla…
BnaA09g47040D	8.41134	6.93815	6.75166	5.48238	6.16746	4.50294	AT1G12580	phosphoenolpyruvate carboxylase-related kinase 1	phosphoenolpyruvate carboxylase-related kinase 1 (PEPKR1); FUNCTIONS IN: protein serine/threonine kinase activity, protein kinase activity, kinase activity, ATP binding; INVOLVED IN: protein amino acid phosphorylation; LOCATED IN: cellular_component unknown; EXPRESSED IN: 22 plant structures; EXPRESSED DURING: 13 growth stages; CONTAINS InterPro DOMAIN/s: Protein kinase, ATP binding site (InterPr…
BnaA09g47070D	0.012692	0.24433	0.152545	0	0	0	AT1G12540	basic helix-loop-helix (bHLH) DNA-binding superfamily protein	basic helix-loop-helix (bHLH) DNA-binding superfamily protein; FUNCTIONS IN: DNA binding, sequence-specific DNA binding transcription factor activity; INVOLVED IN: regulation of transcription; LOCATED IN: nucleus; CONTAINS InterPro DOMAIN/s: Helix-loop-helix DNA-binding domain (InterPro:IPR001092), Helix-loop-helix DNA-binding (InterPro:IPR011598); BEST Arabidopsis thaliana protein match is: basi…
BnaA09g47080D	7.55403	7.76914	6.41614	0.71622	0.816352	0.338673	AT1G12530	unknown protein; BEST Arabidopsis thaliana protein match is: unknown protein (TAIR:AT1G56420.1); Has 54 Blast hits to 53 proteins in 13 species: Archae - 0; Bacteria - 0; Metazoa - 0; Fungi - 0; Plants - 54; Viruses - 0; Other Eukaryotes - 0 (source: NCBI BLink).	0
BnaA09g47280D	5.29044	5.31139	5.86725	4.79821	3.51246	5.96243	AT1G12244	Polynucleotidyl transferase, ribonuclease H-like superfamily protein	Polynucleotidyl transferase, ribonuclease H-like superfamily protein; FUNCTIONS IN: hydrolase activity, acting on ester bonds, nucleic acid binding; INVOLVED IN: DNA repair, nucleobase, nucleoside, nucleotide and nucleic acid metabolic process, DNA recombination, response to DNA damage stimulus; LOCATED IN: endomembrane system, cytoplasm; CONTAINS InterPro DOMAIN/s: Resolvase, RNase H-like fold (…
BnaA09g47330D	0.260867	0.218053	0.106857	0	0	0	-	-	-
BnaA09g47380D	0.310691	0.0451017	0	0	0.180468	0.107983	AT1G12110	nitrate transporter 1.1	Encodes NRT1.1 (CHL1), a dual-affinity nitrate transporter. The protein is expressed in guard cells and function in stomatal opening. Mutants have less transpiration and are more tolerant to drought. Expressed in lateral roots. Involved in nitrate signaling which enables the plant root system to detect and exploit nitrate-rich soil patches. Comparing to the wild type, the mutant displays a strong…
BnaA09g48360D	10.9342	5.77501	5.61766	0	0	0	AT1G09580	emp24/gp25L/p24 family/GOLD family protein	emp24/gp25L/p24 family/GOLD family protein; FUNCTIONS IN: protein transmembrane transporter activity; INVOLVED IN: intracellular protein transport, transport; LOCATED IN: endomembrane system, integral to membrane, membrane; CONTAINS InterPro DOMAIN/s: GOLD (InterPro:IPR009038), emp24/gp25L/p24 (InterPro:IPR000348); BEST Arabidopsis thaliana protein match is: emp24/gp25L/p24 family/GOLD family pro…
BnaA09g49220D	1.55562	1.07301	0.898235	20.3697	15.3482	10.0236	AT1G07830	ribosomal protein L29 family protein	ribosomal protein L29 family protein; FUNCTIONS IN: structural constituent of ribosome; INVOLVED IN: translation; LOCATED IN: mitochondrion, ribosome, mitochondrial ribosome, intracellular; EXPRESSED IN: 22 plant structures; EXPRESSED DURING: 13 growth stages; CONTAINS InterPro DOMAIN/s: Ribosomal protein L47, mitochondrial (InterPro:IPR010729), Ribosomal protein L29 (InterPro:IPR001854); Has 365…
BnaA09g49250D	0.150889	0.52474	0.174147	2.12315	16.5085	2.29567	AT1G07750	RmlC-like cupins superfamily protein	RmlC-like cupins superfamily protein; FUNCTIONS IN: copper ion binding, zinc ion binding, nutrient reservoir activity; INVOLVED IN: biological_process unknown; LOCATED IN: cellular_component unknown; EXPRESSED IN: 26 plant structures; EXPRESSED DURING: 14 growth stages; CONTAINS InterPro DOMAIN/s: Cupin, RmlC-type (InterPro:IPR011051), Cupin 1 (InterPro:IPR006045), RmlC-like jelly roll fold (Inte…
BnaA09g51700D	0.301328	0.067483	1.68052	0.0440007	0.0285537	0.0511593	AT4G00370	Major facilitator superfamily protein	Encodes an inorganic phosphate transporter (PHT4;4) that can transport ascorbate and is located in the chloroplast envelope membrane. It has been shown to play a role in the xanthophyll cycle during photosynthesis and may be required for tolerance to strong light stress.
BnaA09g51840D	0.560935	0.861102	1.75179	0.528281	0.423067	0.288292	AT4G00590	N-terminal nucleophile aminohydrolases (Ntn hydrolases) superfamily protein	N-terminal nucleophile aminohydrolases (Ntn hydrolases) superfamily protein; FUNCTIONS IN: hydrolase activity; EXPRESSED IN: 19 plant structures; EXPRESSED DURING: 8 growth stages; CONTAINS InterPro DOMAIN/s: Peptidase T2, asparaginase 2 (InterPro:IPR000246); BEST Arabidopsis thaliana protein match is: N-terminal nucleophile aminohydrolases (Ntn hydrolases) superfamily protein (TAIR:AT3G16150.1);…
BnaA09g52050D	0.621666	1.16538	0.640104	0.286026	0.361621	0.293171	AT4G00860	Protein of unknown function (DUF1138)	putative pathogenesis-related protein whose transcript level is induced in response to ozone and pathogenic Pseudomonas strains.
BnaA09g52100D	3.50308	2.46749	2.63854	0.329839	0.466565	0.251675	AT4G00950	Protein of unknown function (DUF688)	maternal effect embryo arrest 47 (MEE47); CONTAINS InterPro DOMAIN/s: Protein of unknown function DUF688 (InterPro:IPR007789); Has 1807 Blast hits to 1807 proteins in 277 species: Archae - 0; Bacteria - 0; Metazoa - 736; Fungi - 347; Plants - 385; Viruses - 0; Other Eukaryotes - 339 (source: NCBI BLink).
BnaA09g53000D	20.5266	18.9917	25.7423	4.68257	4.80024	5.43905	AT1G63010	Major Facilitator Superfamily with SPX (SYG1/Pho81/XPR1) domain-containing protein	Major Facilitator Superfamily with SPX (SYG1/Pho81/XPR1) domain-containing protein; INVOLVED IN: transmembrane transport; LOCATED IN: vacuolar membrane, plant-type vacuole; EXPRESSED IN: 25 plant structures; EXPRESSED DURING: 13 growth stages; CONTAINS InterPro DOMAIN/s: SPX, N-terminal (InterPro:IPR004331), Major facilitator superfamily MFS-1 (InterPro:IPR011701), Major facilitator superfamily, …
BnaA09g53830D	0	0	0	0.154245	0.178259	0.224279	-	-	-
BnaA09g54060D	0	0	0	0.510026	0.358719	0.702518	-	-	-
BnaA09g55490D	0.036917	0.126304	0.148293	1.90883	9.24239	0.80989	-	-	-
BnaA09g55520D	0.0236787	0.02217	0.0361803	15.4585	45.6497	6.87404	-	-	-
BnaA09g55630D	0.701986	0.415627	0.645387	0.0324517	0.042529	0.01348	-	-	-
BnaA09g55740D	0.309211	0.292322	0.382436	0.13629	0.00753067	0.000119	-	-	-
BnaA09g55940D	0	1.98016	2.06626	20.0778	10.0754	14.4543	-	-	-
BnaA09g56340D	0.090051	0.116794	0	3.70832	4.3354	1.66385	AT1G16360	LEM3 (ligand-effect modulator 3) family protein / CDC50 family protein	LEM3 (ligand-effect modulator 3) family protein / CDC50 family protein; INVOLVED IN: biological_process unknown; LOCATED IN: membrane; EXPRESSED IN: 8 plant structures; EXPRESSED DURING: L mature pollen stage, M germinated pollen stage, 4 anthesis, petal differentiation and expansion stage; CONTAINS InterPro DOMAIN/s: Protein of unknown function DUF284, transmembrane eukaryotic (InterPro:IPR00504…
BnaA09g56390D	0	0	0	13.7373	14.3847	10.86	AT1G16240	syntaxin of plants 51	Encodes one of 24 Arabidopsis syntaxins. Its mRNA has been shown to be expressed.
BnaA09g56940D	6.18511	6.34146	5.34145	0.389123	0.460814	0.345156	AT1G14610	valyl-tRNA synthetase / valine--tRNA ligase (VALRS)	Required for proper proliferation of basal cells.
BnaA09g57040D	14.6886	10.6114	10.7852	0	0	0	AT1G14510	alfin-like 7	Encodes a member of the Alfin1-like family of nuclear-localized PHD (plant homeodomain) domain containing proteins. All AL proteins except AL3 bind to di- or trimethylated histone H3 (H3K4me3/2). Members of this family include: AT5G05610 (AL1), AT3G11200 (AL2), AT3G42790 (AL3), AT5G26210 (AL4), AT5G20510 (AL5), AT2G02470 (AL6), AT1G14510 (AL7).
BnaA10g00850D	0	0	0	0.745696	0.558142	0.324423	-	-	-
BnaA10g01010D	11.9333	10.4357	11.1614	19.3456	16.7591	19.1516	AT1G02350	protoporphyrinogen oxidase-related	protoporphyrinogen oxidase-related; FUNCTIONS IN: molecular_function unknown; INVOLVED IN: siroheme biosynthetic process; Has 0 Blast hits to 0 proteins in 0 species (source: NCBI BLink).
BnaA10g01510D	0.155521	1.24195	0	1.05416	15.6747	3.84581	AT1G02930	glutathione S-transferase 6	Encodes glutathione transferase belonging to the phi class of GSTs. Naming convention according to Wagner et al. (2002).
BnaA10g03020D	0	0	0	0.301016	0.254186	0.456212	AT1G04880	HMG (high mobility group) box protein with ARID/BRIGHT DNA-binding domain	HMG (high mobility group) box protein with ARID/BRIGHT DNA-binding domain; FUNCTIONS IN: sequence-specific DNA binding transcription factor activity; INVOLVED IN: regulation of transcription; LOCATED IN: intracellular, nucleus; EXPRESSED IN: 10 plant structures; EXPRESSED DURING: 7 growth stages; CONTAINS InterPro DOMAIN/s: High mobility group, superfamily (InterPro:IPR009071), High mobility grou…
BnaA10g03460D	7.06634	12.8214	17.0169	1.26678	4.38699	2.64747	AT1G05300	zinc transporter 5 precursor	member of Fe(II) transporter isolog family
BnaA10g05770D	0	0	0	0	0	4.07724	-	-	-
BnaA10g08980D	0	0	0	0.119921	0.109729	0.106318	-	-	-
BnaA10g09180D	0.71014	0.854885	1.03833	2.32576	2.84154	2.25592	AT5G54860	Major facilitator superfamily protein	Major facilitator superfamily protein; FUNCTIONS IN: transporter activity; INVOLVED IN: transport; LOCATED IN: endomembrane system, membrane; EXPRESSED IN: 23 plant structures; EXPRESSED DURING: 15 growth stages; CONTAINS InterPro DOMAIN/s: Major facilitator superfamily, general substrate transporter (InterPro:IPR016196), Biopterin transport-related protein BT1 (InterPro:IPR004324); BEST Arabidop…
BnaA10g11820D	0	0.267399	0	0.0293483	0	0	AT5G58510	unknown protein; FUNCTIONS IN: molecular_function unknown; INVOLVED IN: biological_process unknown; LOCATED IN: chloroplast; EXPRESSED IN: 23 plant structures; EXPRESSED DURING: 14 growth stages; BEST Arabidopsis thaliana protein match is: unknown protein (TAIR:AT5G55060.2); Has 30201 Blast hits to 17322 proteins in 780 species: Archae - 12; Bacteria - 1396; Metazoa - 17338; Fungi - 3422; Plants …	0
BnaA10g12550D	10.2193	5.42293	4.92867	0	0	0	-	-	-
BnaA10g13370D	6.20233	3.1126	5.0023	3.23828	3.41404	3.21288	AT5G60570	Galactose oxidase/kelch repeat superfamily protein	Galactose oxidase/kelch repeat superfamily protein; CONTAINS InterPro DOMAIN/s: Galactose oxidase/kelch, beta-propeller (InterPro:IPR011043), Kelch repeat type 1 (InterPro:IPR006652), Kelch related (InterPro:IPR013089), Kelch-type beta propeller (InterPro:IPR015915); BEST Arabidopsis thaliana protein match is: Galactose oxidase/kelch repeat superfamily protein (TAIR:AT1G26930.1); Has 1807 Blast h…
BnaA10g13430D	17.7187	19.2741	21.1022	44.8094	74.2625	109.285	-	-	-
BnaA10g13600D	0.0662373	0.0187903	0.0250793	0	0	0.026956	.	-	-
BnaA10g14970D	4.24108	0.408808	0.233533	0	0	0	AT5G20510	alfin-like 5	Encodes a member of the Alfin1-like family of nuclear-localized PHD (plant homeodomain) domain containing proteins. All AL proteins except AL3 bind to di- or trimethylated histone H3 (H3K4me3/2). Members of this family include: AT5G05610 (AL1), AT3G11200 (AL2), AT3G42790 (AL3), AT5G26210 (AL4), AT5G20510 (AL5), AT2G02470 (AL6), AT1G14510 (AL7).
BnaA10g15810D	4.0127	2.55854	1.94768	2.39336	1.98435	0.942008	AT5G19300	CONTAINS InterPro DOMAIN/s: Nucleic acid-binding, OB-fold-like (InterPro:IPR016027), Protein of unknown function DUF171 (InterPro:IPR003750); Has 3649 Blast hits to 1964 proteins in 291 species: Archae - 113; Bacteria - 121; Metazoa - 1082; Fungi - 399; Plants - 227; Viruses - 4; Other Eukaryotes - 1703 (source: NCBI BLink).	0
BnaA10g15850D	15.4695	11.8146	12.1114	1.40755	0.314316	2.75437	AT5G19220	ADP glucose pyrophosphorylase large subunit 1	Encodes the large subunit of ADP-glucose pyrophosphorylase which catalyzes the first, rate limiting step in starch biosynthesis. The large subunit plays a regulatory role whereas the small subunit (ApS) is the catalytic isoform. Four isoforms (ApL1-4) have been identified. ApL1 is the major large subunit isoform present in leaves. Mutational analysis of APS1 suggests that APL1 and APL2 can compen…
BnaA10g16180D	0	0	0	0.00111	0.00607433	0.00497967	AT5G18830	squamosa promoter binding protein-like 7	Encodes a member of the Squamosa Binding Protein family of transcriptional regulators. SPL7 is expressed highly in roots and appears to play a role in copper homeostasis. Mutants are hypersensitive to copper deficient conditions and display a retarded growth phenotype. SPL7 binds to the promoter of the copper responsive miRNAs miR398b and miR389c.
BnaA10g16640D	4.2961	4.42669	4.37896	11.8663	9.90728	9.43805	AT5G18200	UTP:galactose-1-phosphate uridylyltransferases;ribose-5-phosphate adenylyltransferases	encodes an adenylyltransferase
BnaA10g16670D	0.670708	0.720247	0.576946	6.43856	7.74944	6.31077	AT5G18150	Methyltransferase-related protein	Methyltransferase-related protein; FUNCTIONS IN: molecular_function unknown; INVOLVED IN: biological_process unknown; LOCATED IN: endomembrane system; EXPRESSED IN: 24 plant structures; EXPRESSED DURING: 15 growth stages; BEST Arabidopsis thaliana protein match is: unknown protein (TAIR:AT5G14602.1); Has 1807 Blast hits to 1807 proteins in 277 species: Archae - 0; Bacteria - 0; Metazoa - 736; Fun…
BnaA10g16710D	2.03896	1.70212	0.964812	0	0	0.295388	AT5G18110	novel cap-binding protein	novel cap-binding protein (NCBP); FUNCTIONS IN: RNA binding, translation initiation factor activity; INVOLVED IN: translational initiation; LOCATED IN: cytoplasm; EXPRESSED IN: 23 plant structures; EXPRESSED DURING: 15 growth stages; CONTAINS InterPro DOMAIN/s: Eukaryotic translation initiation factor 4E (eIF-4E) (InterPro:IPR001040), Eukaryotic translation initiation factor 4E (eIF-4E), conserve…
[truncated: 1,570 more rows]

## Sheet: Table S7
Supplementary Table S7 Expression patterns of differentially expression genes (DEGs) overlapped with GWAS for seed weight (SW) between R01 and R56
Gene ID	R01_2W	R01_3W	R01_4W	R56_2W	R56_3W	R56_4W	Arabidopsis	Annotation			Function
BnaA02g13620D	0.0449057	0.0229227	0.039694	0.000509667	0.00764767	0	.	-	-	-	-
BnaA02g13880D	0.202436	0.444421	0.141841	0	0	0	.	-	-	-	-
[truncated: 50 more rows]

## Sheet: Table S8
Supplementary Table S8 Expression patterns of differentially expression genes (DEGs) overlapped with GWAS for seed per pod (SP) between A01 and A56
[truncated: 28 more rows]
